# Supplementary material for: Hydrogenation of CO2 to methanol by the diphosphine–ruthenium(ii) cationic complex: a DFT investigation to shed light on the decisive role of carboxylic acids as promoters
Source: Royal Society of Chemistry journal article supplement (doi:10.1039/d1cy00502b), 2021-01-01
Supplement: d1cy00502b1.pdf [file d1cy00502b1.pdf]

## Supporting Information

### Hydrogenation of CO<sub>2</sub> to methanol by the diphosphine–ruthenium(II) cationic complex: a DFT investigation to shed light on the decisive role of carboxylic acids as promoters

Valeria Butera,<sup>\*a</sup> Hermann Detz<sup>a,b</sup>

<sup>a</sup> CEITEC - Central European Institute of Technology Central European Institute of Technology, Brno University of Technology, Purkyňova 123, Brno 612 00, Czech Republic.

<sup>b</sup> Center for Micro- and Nanostructures & Institute of Solid State Electronics, TU Wien, 1040 Vienna, Austria.

#### Corresponding Author

Email: butera@vutbr.cz

#### Table of contents

|                                                                                                                                                                                                                                              |             |
|----------------------------------------------------------------------------------------------------------------------------------------------------------------------------------------------------------------------------------------------|-------------|
| <b>S1. Selection of the computational protocol</b>                                                                                                                                                                                           | <b>S2</b>   |
| <b>S2. Scan calculation</b>                                                                                                                                                                                                                  | <b>S3</b>   |
| <b>S3. Potential spontaneous proton transfer from one acetic acid molecule to chloride for the production and release of HCl.</b>                                                                                                            | <b>S6</b>   |
| <b>S4. Further investigated mechanisms for the methanol production.</b>                                                                                                                                                                      | <b>S6</b>   |
| <b>S5. Evaluation of the thermal corrections to free Gibbs Energies at the experimental temperature (160°C) vs the room temperature.</b>                                                                                                     | <b>S8</b>   |
| <b>S6. Details concerning the approach used to calculate the Gibbs free energy in solution.</b>                                                                                                                                              | <b>S9</b>   |
| <b>S7. Cartesian coordinates (Å) and zero-point corrected energies, (Hartrees) of optimized structures of stationary points for the hydrogenation of CO<sub>2</sub> in absence of acid.</b>                                                  | <b>S9</b>   |
| <b>S8. Cartesian coordinates (Å) and zero-point corrected energies, (Hartrees) of optimized structures of stationary points for the formation of the active specie Ru<sub>2</sub><sub>ace</sub> H in presence of <u>acetate anion</u>.</b>   | <b>S46</b>  |
| <b>S9. Cartesian coordinates (Å) and zero-point corrected energies, (Hartrees) of optimized structures of stationary points for the formation of the active specie Ru<sub>2</sub><sub>ace</sub> H in presence of <u>hexanoate anion</u>.</b> | <b>S58</b>  |
| <b>S10. Cartesian coordinates (Å) and zero-point corrected energies, (Hartrees) of optimized structures of stationary points for the formation of the the methanol formation in presence of <u>acetate anion</u>.</b>                        | <b>S71</b>  |
| <b>S11. Cartesian coordinates (Å) and zero-point corrected energies, (Hartrees) of optimized structures of stationary points for the methanol formation in presence of <u>hexanoate anion</u>.</b>                                           | <b>S105</b> |
| <b>S12. Cartesian coordinates of the optimized stationary points along the side reaction</b>                                                                                                                                                 | <b>S144</b> |

### S1. Selection of the computational protocol.

The optimization of the complex **Ru2<sup>+</sup>** has been performed using several exchange–correlation functionals, including functionals developed to properly take into consideration weak interactions such as M06-L and  $\omega$ -B97XD, to test the reliability of the B3LYP results. Furthermore, both LANL2DZ and SDD effective core potentials (ECPs) were tested for describing Ru atom. Geometric parameters that include calculated bond distances and angles were compared to the experimental ones reported by Sun and co-workers,<sup>12</sup> and all the values are listed in table S1. According to our results, the inclusion of dispersion forces is not really beneficial, while the well-known B3LYP functional shows the best overall fitting of the selected parameters. Moreover, the use of SDD pseudo potential over LANL2DZ leads to bond distances that are closer to the experimental values. Based on those observations, B3LYP/SDD method has been selected for our DFT study. However, the search of critical transition states along with the check of very

|                   | Exp   | M06L/<br>LANL2DZ | B3LYP/<br>SDD | B3LYP/<br>LANL2DZ | $\omega$ -B97XD/<br>LANL2DZ | $\omega$ -B97XD/<br>SDD |
|-------------------|-------|------------------|---------------|-------------------|-----------------------------|-------------------------|
| <b>Ru1–Cl1</b>    | 2.409 | 2.491            | 2.433         | 2.439             | 2.453                       | 2.446                   |
| <b>Ru1–P2</b>     | 2.328 | 2.335            | 2.342         | 2.394             | 2.328                       | 2.333                   |
| <b>Ru1–P1</b>     | 2.329 | 2.358            | 2.362         | 2.407             | 2.362                       | 2.359                   |
| <b>Ru1–C4</b>     | 2.221 | 2.248            | 2.284         | 2.316             | 2.286                       | 2.243                   |
| <b>P3–O1</b>      | 1.480 | 1.505            | 1.498         | 1.503             | 1.502                       | 1.502                   |
| <b>P1–Ru1–Cl1</b> | 87.8  | 102.6            | 89.1          | 84.8              | 101.3                       | 101.7                   |
| <b>P2–Ru1–Cl1</b> | 85.1  | 88.7             | 88.4          | 84.4              | 89.3                        | 89.0                    |
| <b>P1–Ru1–P2</b>  | 86.8  | 85.7             | 92.7          | 89.6              | 86.0                        | 86.0                    |

high energy barriers were calculated using  $\omega$ -B97XD functional to confirm the reliability of the B3LYP functional.

Table S1. DFT optimized geometrical structure of cationic portion of **Ru2<sup>+</sup>**. Selected bond lengths (Å) and angles (°) compared with available experimental values<sup>12</sup>

## S2. Scan calculations

The computational protocol used for the scan calculations discussed below is the same described in the “Computational Details” section of the main text. Therefore, Ru metal center, has been described using the relativistic compact Stuttgart/Dresden (SDD) effective core potential<sup>34</sup>. The standard 6-31G\* basis sets of Pople and co-workers were employed for the rest of the atoms, except C and H atoms of phenyl rings on which the smaller 3-21G basis were used. B3LYP functional has been selected. In order to get a better estimation of the energy associated to the maxima of each scan calculation, the corresponding structures have been used to run single point calculations performed using the bigger 6-311+G\*\* basis sets for all the atoms but Ru, for which SDD was kept. Single point calculations included also the effect of the solvent following the method described in the main text.

### S2.1. Scan\_1

In **scan\_1**, shown in figure S1, the H<sub>2</sub> molecule approaches to the metal center moving in between the p-cymene molecule and one phenyl ligand of Ru. The relaxed scan calculation involves 10 steps in which the initial Ru-H<sub>2</sub> distance in **1\_H<sub>2eq</sub>\*** is set to 3.830 Å and is decreased by 0.200 Å to the final bond distance of 1.830 Å in **2\_H<sub>2eq</sub>\***. The scan calculation underlines the presence of a maximum **ts1\_H<sub>2eq</sub>\***, whose structure has been used as starting structure for the search of a transition state. However, all our attempts, that include also the use of ω-B97XD and M06-L functionals, have failed and no stationary point with a unique imaginary frequency has been intercepted.

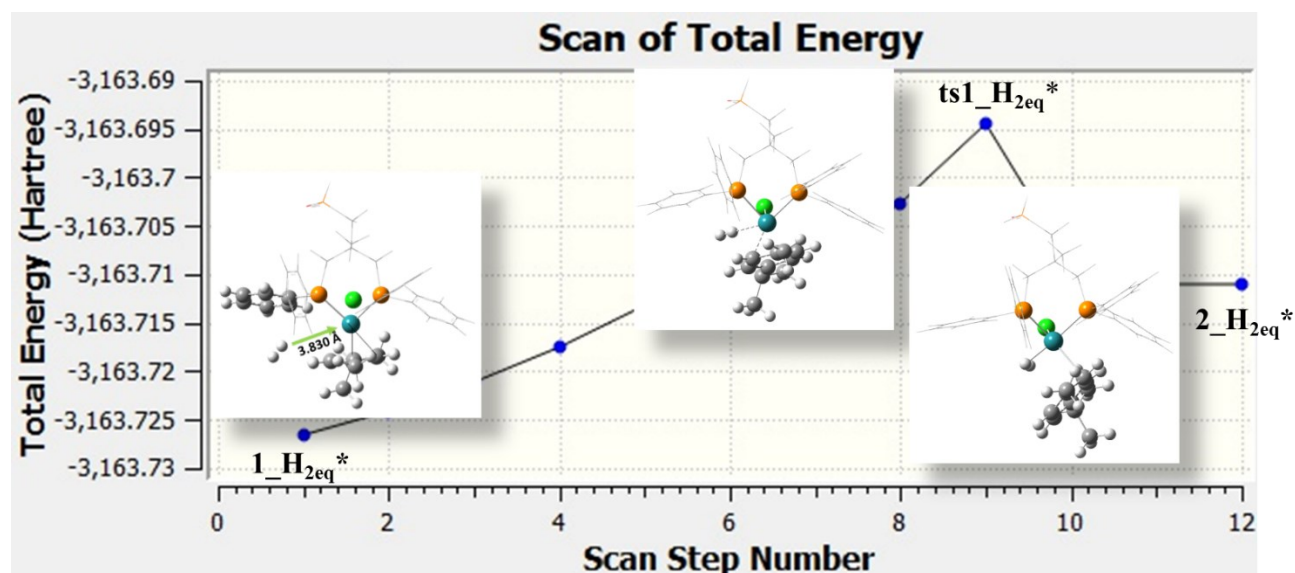

Figure S1. Calculated **Scan\_1** and related structures.

### S2.2. Scan\_2

In **scan\_2**, shown in figure S2, the H<sub>2</sub> molecule approaches to the metal center from the axial direction. The relaxed scan calculation involves 9 steps in which the initial Ru-H<sub>2</sub> distance in **1\_H<sub>2eq</sub>\*** is set to 3.500 Å and is decreased by 0.200 Å to the final bond distance of 1.700 Å in **2\_H<sub>2eq</sub>\***. The scan calculation underlines the presence of a maximum **ts1\_H<sub>2eq</sub>\***, whose structure has been used as starting structure for the search of a transition state, which, also in this case, was not found. The following steps of the investigated reaction mechanism are discussed in the main text.

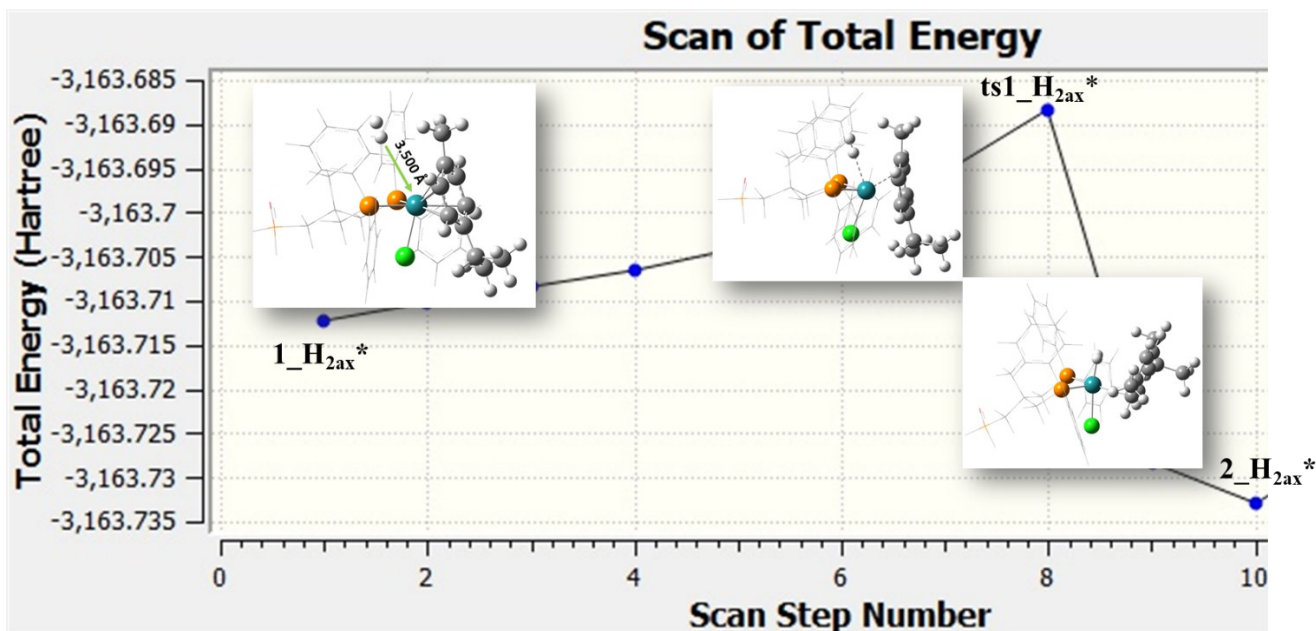

Figure S2. Calculated **Scan\_2** and related structures.

### S2.3. Scan\_3

In **scan\_3**, shown in figure S3, carbon dioxide approaches to the metal center from the equatorial direction. The relaxed scan calculation involves 8 steps in which the initial Ru-O distance in **1\_CO<sub>2eq</sub>\*** is set to 3.200 Å and is decreased by 0.100 Å to the final bond distance of 2.400 Å in **2\_CO<sub>2eq</sub>\***. The scan calculation underlines the presence of a maximum **ts1\_CO<sub>2eq</sub>\***, whose structure has been used as starting structure for the search of a transition state, with no success. As discussed in the main text, the coordination of a hydrogen molecule in axial position leads to the formation of **3\_H<sub>2ax</sub>** intermediate and the reaction does not continue.

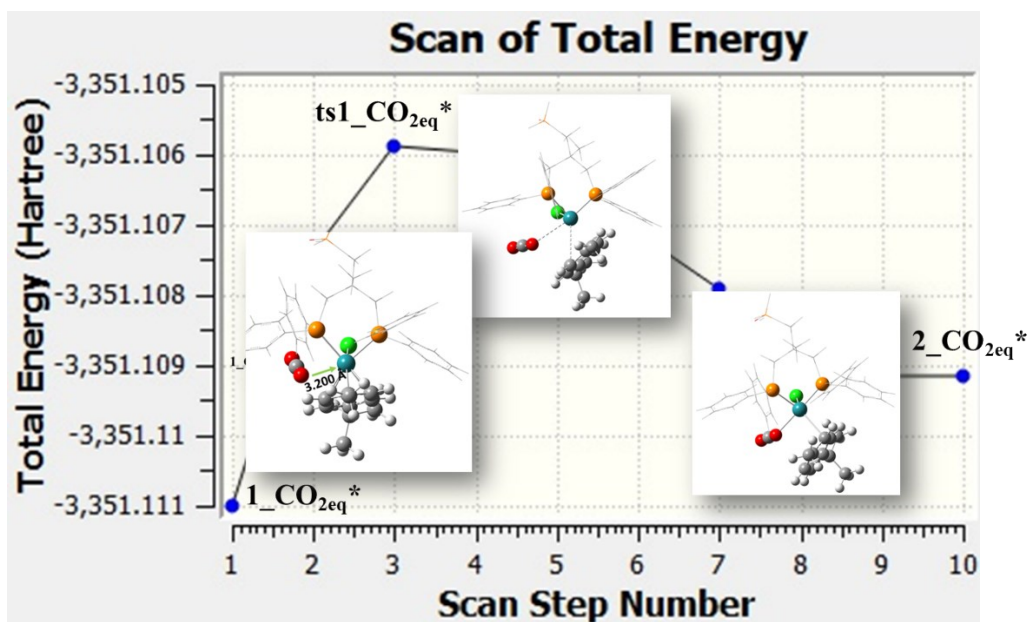

Figure S3. Calculated **Scan\_3** and related structures.

#### S2.4. Scan\_4

In **scan\_4**, shown in figure S4, carbon dioxide approaches to the metal center from the axial direction. The relaxed scan calculation involves 10 steps in which the initial Ru-O distance in  $1\_CO_{2eq}^*$  is set to 4.174 Å and is decreased by 0.200 Å to the final bond distance of 2.174 Å in  $2\_CO_{2ax}^*$ . The scan calculation underlines the presence of a maximum  $ts1\_CO_{2eq}^*$ , whose structure has been used as starting structure for the search of a transition state, which has been identified. The further details of the reaction mechanism are discussed in the main text.

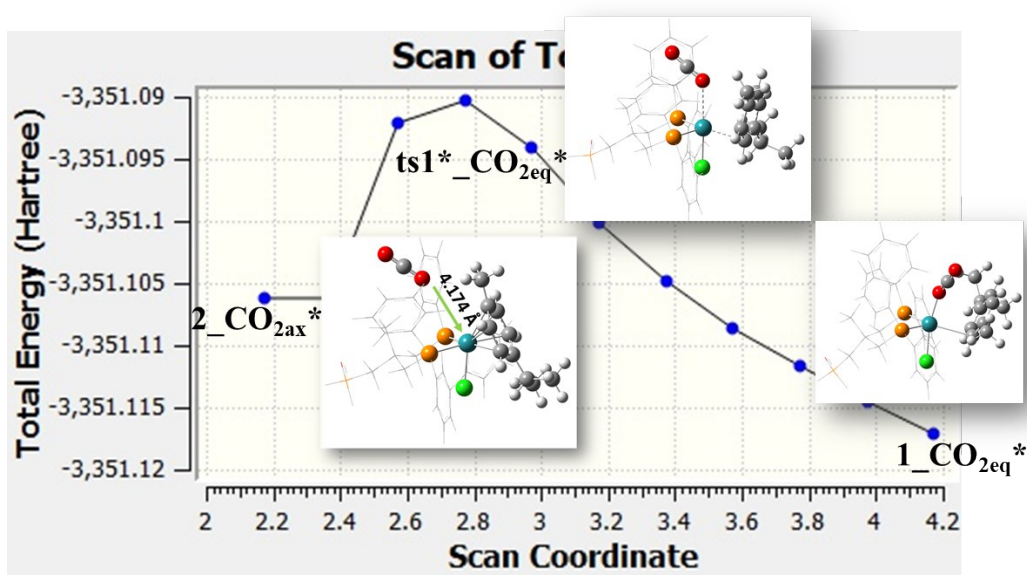

Figure S4. Calculated **Scan\_4** and related structures

### S3. Potential spontaneous proton transfer from one acetic acid molecule to chloride for the production and release of HCl.

To investigate the potential spontaneous proton transfer from a molecule of acetic acid to the chloride, with consequent formation and release of HCl, the Ru<sup>2+</sup> cation complex has been optimized in presence of a molecule of the acid, as in **Ru<sup>2+</sup>+CH<sub>3</sub>OH** shown in figure S5a. Our calculations show that no spontaneous proton occurs during the relaxation. The same result has been obtained also using ωB97XD functional to better taking into account the weak interactions. Moreover, the structure of the complex in which acetate anion has replaced the chloride anion while HCl has been formed and released, as in figure 5b, is 18.2 kcal/mol less stable than the starting complex, **Ru<sup>2+</sup>+CH<sub>3</sub>OH**.

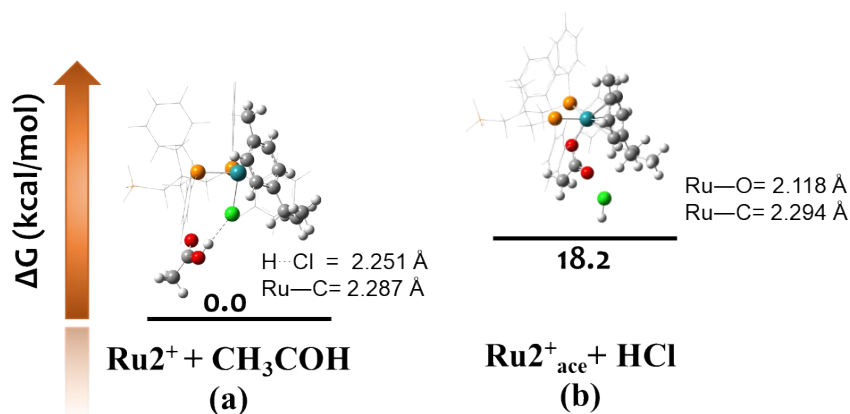

Figure S5. Optimized structures of **Ru<sup>2+</sup>+CH<sub>3</sub>OH** and **Ru<sup>2+</sup><sub>ace</sub>+HCl**. Energies are in kcal/mol and relative to the most stable intermediate **Ru<sup>2+</sup>+CH<sub>3</sub>OH**.

Starting from **Ru<sup>2+</sup><sub>ace</sub>+HCl**, a relaxed scan calculation, **Scan\_5**, has been performed in which the H<sub>2</sub>-Ru distance is decreased from 1.908 to 1.608 Å, as shown in figure S6. The scan shows that *p*-cymene is not released as a consequence of the hydrogen coordination. Those findings further support that the active specie formation occurs following the mechanism presented previously.

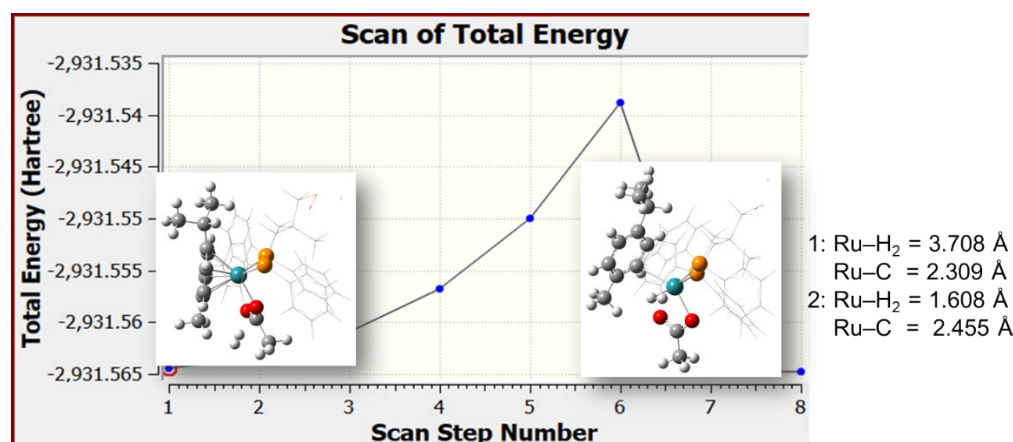

Figure S6. Calculated **Scan\_5** and related structures.

### S4. Further investigated mechanisms for the methanol production.

#### S4.1.

Figure S7 shows the B3LYP gas-phase zero-point-corrected energy profile for the hydrogenation reaction of formate by an uncoordinated H<sub>2</sub> molecule that leads to the production of formic acid. The computed energy barrier is very high and corresponds to 68.7 kcal/mol. To test the reliability of the B3LYP results, the discussed stationary points have been re-optimized using the exchange–correlation functional  $\omega$ -B97XD, whose calculated energy barrier is 67.7 kcal/mol. Such calculations have demonstrated that the energetics is not significantly influenced by the inclusion of dispersion corrections. Due to the prohibitive energy barrier, this reaction is not likely to take place and the further steps were not investigated.

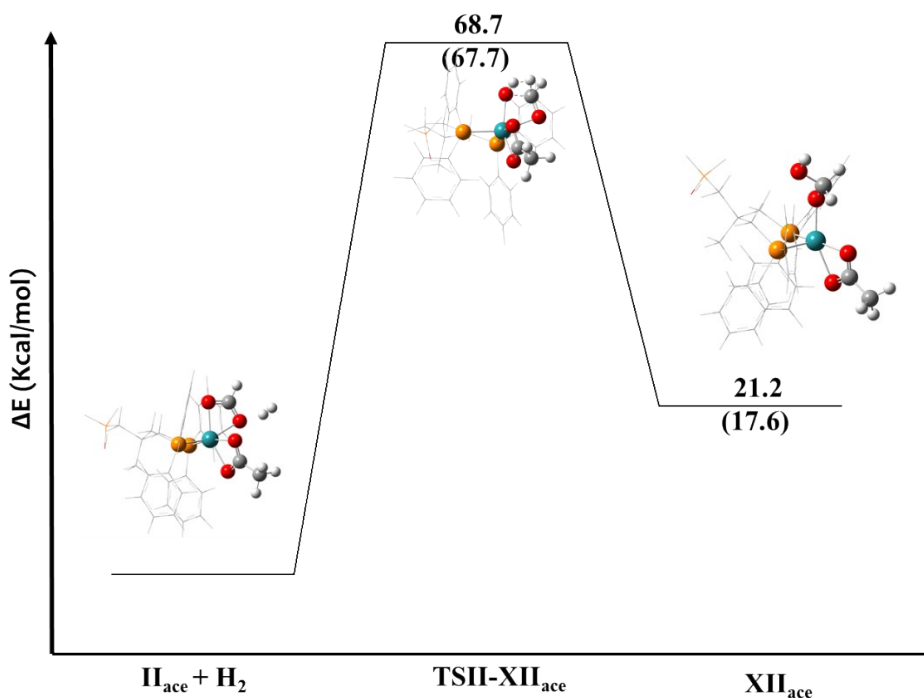

Figure S7. Calculated B3LYP gas-phase zero-point-corrected energy profile for the hydrogenation reaction of formate by an uncoordinated H<sub>2</sub> molecule.  $\omega$ -B97XD calculated values are shown in parenthesis. Energies are in kilocalories per mole.

#### S4.2.

As mentioned in the main text, the carboxylic acid plays a decisive role in replacing the p-cymene ligand, and favoring the formation of the metal-hydride active specie and the release of HCl. Furthermore, it has been observed that in presence of carboxylic acid the CO<sub>2</sub> molecule coordinate to the metal center via a C–Ru bond that activates the molecule toward the nucleophilic attack of the metal-coordinated hydride, which leads to the formation of formate. We have also investigated if the carboxylic acid has a direct role in the formate-to-methanol conversion. In this regard, the heterolytic breaking of an uncoordinated H<sub>2</sub> molecule that leads to a proton transfer to one oxygen of the formate and a hydride attack to the carboxylic carbon of the acetate has been investigated. The transition state **TSII-XIII<sub>ace</sub>** has been intercepted. A unique imaginary frequency of  $-1306.19i$  cm<sup>-1</sup> is calculated along a computed energy barrier of 61.1 kcal/mol. The formed **XIII<sub>ace</sub>** intermediate is 47.6 kcal/mol less stable than the previous one. Because of the high energy barrier and the endergonic process involved, the reaction has not been taken



in consideration for further investigation. The corresponding calculated B3LYP gas-phase zero-point-corrected energy profile along with the optimized structures of intermediates and transition state are reported in figure S8. Also in this case, the intermediates and transition state have been optimized using  $\omega$ -B97XD functional and very similar values have been obtained, confirming that this mechanism is not likely to occur.

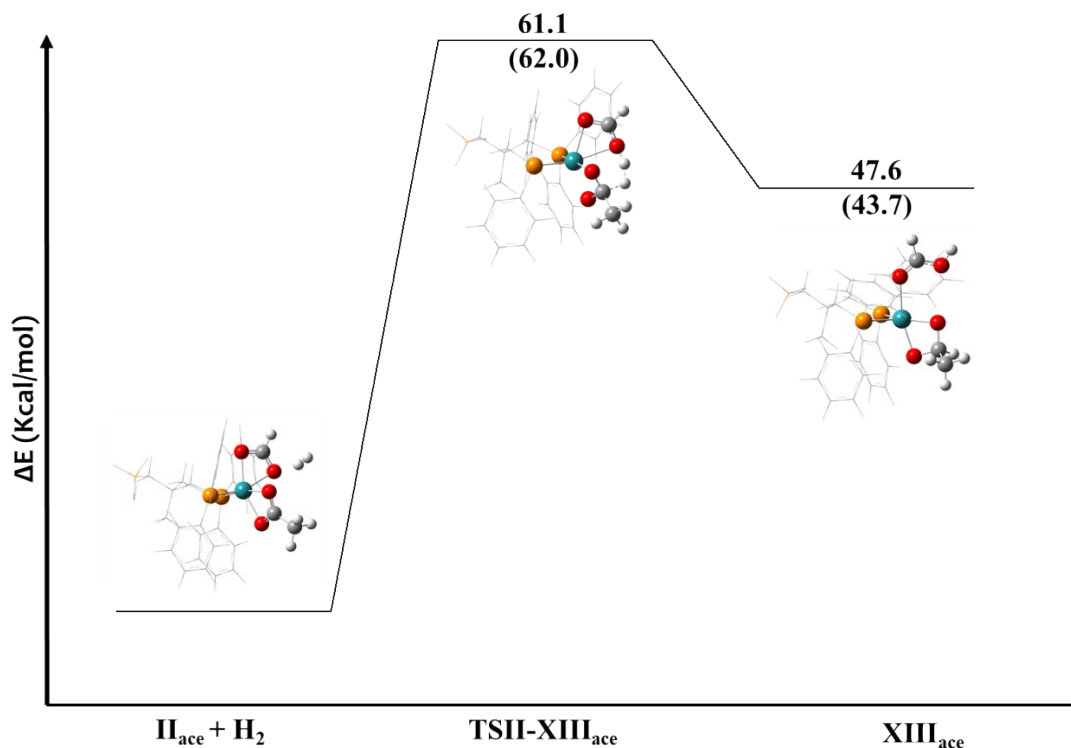

Figure S8. Calculated B3LYP gas-phase zero-point-corrected energy profile for the heterolytic breaking of an uncoordinated  $\text{H}_2$  molecule.  $\omega$ -B97XD calculated values are shown in parenthesis. Energies are in kilocalories per mole.

### S5. Evaluation of the thermal corrections to free Gibbs energies at the experimental temperature (160°C) vs the room temperature.

The effect of the thermal corrections at the experimental temperature (160°C) has been evaluated by comparing the values of the  $\delta E$ s for the methanol production assisted by both the acetate and hexanoate anions. Therefore, the geometries of the  $\text{II}_{\text{ace}}$  and  $\text{TSVI}_{\text{ace}}$ , and those of  $\text{X}_{\text{hex}}$  and  $\text{TSX}_{\text{hex}}$  have been fully relaxed at the experimental temperature, and the optimized structures have been used to run single point calculations considering the solvent effects as described in the computational method. The values at both 25 and 160° C are reported in table S2.



Table S2. Calculated  $\delta E$ s at room temperature and experimental temperature (160°C)

|                        | T=25° C                            |                                    | T=160° C                           |                                    |
|------------------------|------------------------------------|------------------------------------|------------------------------------|------------------------------------|
| Energy barrier         | $I_{\text{ace-TSVI}_{\text{ace}}}$ | $I_{\text{hex-TSVI}_{\text{hex}}}$ | $I_{\text{ace-TSVI}_{\text{ace}}}$ | $I_{\text{hex-TSVI}_{\text{hex}}}$ |
| Free energy (kcal/mol) | 24.9                               | 22.6                               | 23.7                               | 20.6                               |

The computed energy barriers at 160° C are very similar to those computed at room temperature and confirm the lower energy barrier in presence of hexanoate anion. Based on those results, all the calculations have been performed including room temperature.

### S6. Details concerning the approach used to calculate the Gibbs free energy in solution.

Following the procedure proposed by Wertz<sup>1</sup> and previously adopted<sup>2</sup> to properly handle the change of translational and rotational entropy occurring when a solute is transferred from the gas phase into the solution phase, Gibbs free energies in solution for each species, have been calculated as:

$$G_{298K} = E_{\text{elec}} + G_{\text{solv}} + \text{ZPE} + H_{\text{vib}} + 6 kT - T(S_{\text{vib}}) - T[0.54 \times (S_{\text{rot}} + S_{\text{trans}} - 14.3) + 8.0],$$

where  $T=298K$  and the term  $6kT$  accounts for the potential and kinetic energies of the translational and rotational modes. Such procedure involves decomposition of the solute solvation into three steps: (1) the solute is treated as an ideal gas and compressed from 1 atm (1 mol, 24.5 L) to 55.5 mol/L; (2) then the solute is transferred to a hypothetical 55.5 mol/L solution, which has the intermolecular interaction of a dilute solution; (3) finally this hypothetical solution is diluted to 1M (1 mol, 1L). In the first step, due to the compression, the entropy loss of solute is:

$$\Delta S = 1.987 \ln \left( \frac{V_{\text{fin}}}{V_{\text{init}}} \right) = 1.987 \ln \left( \frac{1}{\frac{55.5}{24.5}} \right) = -14.3 \text{ e.u.}$$

In the second step the assumption by Wertz is that the solute loses 46% of its translational and rotational entropies, that means only 54% of translational and rotational entropies is conserved. Finally, due to the dilution of the solution in the third step the entropy gain is:

$$\Delta S = 1.987 \ln \left( \frac{V_{\text{fin}}}{V_{\text{init}}} \right) = 1.987 \ln \left( \frac{1}{55.5} \right) = 8 \text{ e.u.}$$

Therefore, from calculated gas-phase translational and rotational entropies, the entropies in solution can be calculated as:

$$0.54 \times (S_{\text{rot}} + S_{\text{trans}} - 14.3) + 8.0$$

By using the ideal gas translational entropy, the Wertz approximation and the continuum solvation free energies, free energies at standard (1M) concentration can be calculated.

### S7. Cartesian coordinates (Å) and zero-point corrected energies, (Hartrees) of optimized structures of stationary points for the hydrogenation of CO<sub>2</sub> in absence of acid.

H2

Zero-point energy = -1.168366

|   |            |            |             |
|---|------------|------------|-------------|
| H | 0.00000000 | 0.00000000 | 0.37139700  |
| H | 0.00000000 | 0.00000000 | -0.37139700 |

HCl

Zero-point = -460.794043

|    |            |            |             |
|----|------------|------------|-------------|
| Cl | 0.00000000 | 0.00000000 | 0.07144400  |
| H  | 0.00000000 | 0.00000000 | -1.21454100 |

p-cymene

Zero-point = -389.318915

|   |             |             |             |
|---|-------------|-------------|-------------|
| C | -2.20652800 | 0.06478700  | -0.00999400 |
| C | -1.60628900 | -1.19826500 | 0.00056700  |
| C | -0.21719600 | -1.33636600 | 0.00821500  |
| C | 0.62510300  | -0.21957000 | 0.00341500  |
| C | 0.02169600  | 1.04697100  | -0.01054600 |
| C | -1.36409800 | 1.18543800  | -0.01822000 |
| H | -2.23195700 | -2.08775200 | 0.00140700  |
| H | 0.21940800  | -2.33251700 | 0.01429700  |
| H | 0.64090000  | 1.94037500  | -0.01948600 |
| H | -1.80119600 | 2.18136200  | -0.03259700 |
| C | -3.70889300 | 0.22136700  | 0.01011700  |
| H | -4.21048800 | -0.68929600 | -0.32989800 |
| H | -4.07427700 | 0.43745500  | 1.02196800  |
| H | -4.03495900 | 1.04592300  | -0.63208800 |
| C | 2.13930600  | -0.38222500 | 0.00795100  |
| H | 2.34525800  | -1.46076400 | 0.02283900  |
| C | 2.78265800  | 0.19157100  | -1.26831800 |
| H | 2.62590900  | 1.27347800  | -1.34001700 |
| H | 3.86342400  | 0.01199900  | -1.27250400 |
| H | 2.35687100  | -0.26627600 | -2.16641700 |
| C | 2.77897200  | 0.22590200  | 1.27003100  |
| H | 2.35046000  | -0.20727200 | 2.17900900  |
| H | 3.85964600  | 0.04620200  | 1.28221700  |
| H | 2.62261600  | 1.30941800  | 1.31195500  |

Ru2+

Zero-point = -3161.806090

|    |             |             |             |
|----|-------------|-------------|-------------|
| Ru | 0.84007800  | -0.79679300 | 0.38878400  |
| P  | 1.13053400  | 1.40280700  | -0.36053700 |
| P  | -1.47855400 | -0.61167700 | -0.01999500 |
| C  | -1.88724200 | 0.27209500  | -1.59984400 |
| H  | -1.46325200 | -0.35882300 | -2.38442000 |
| H  | -2.97450700 | 0.22567700  | -1.68970400 |
| C  | 0.13282000  | 1.86698500  | -1.86513300 |
| C  | -1.41935900 | 1.74135800  | -1.82472700 |
| C  | -1.90146500 | 2.16630500  | -3.25106700 |

|   |             |             |             |
|---|-------------|-------------|-------------|
| H | -1.73637900 | 3.24256400  | -3.37325500 |
| H | -1.31728300 | 1.66087100  | -4.03200700 |
| P | -3.67962100 | 1.82532100  | -3.64768100 |
| H | -3.92662900 | 2.75651500  | -4.68773000 |
| H | -3.60809100 | 0.60827400  | -4.37393100 |
| O | -4.65241000 | 1.82582600  | -2.50195600 |
| H | 0.40233300  | 2.90288800  | -2.09899600 |
| H | 0.51770000  | 1.23438900  | -2.66748400 |
| C | -2.03423400 | 2.72985800  | -0.81279700 |
| H | -1.76712000 | 2.49498000  | 0.21646400  |
| H | -1.67317400 | 3.74326400  | -1.01805800 |
| H | -3.12243100 | 2.72885300  | -0.89263500 |
| C | -2.63168800 | 0.10030900  | 1.23043000  |
| C | -3.92250100 | 0.53182200  | 0.86167500  |
| C | -2.27792400 | 0.12852100  | 2.58823400  |
| C | -4.81308800 | 0.99246000  | 1.83260200  |
| H | -4.24573600 | 0.53504100  | -0.17213900 |
| C | -3.17427200 | 0.58314900  | 3.55835200  |
| H | -1.29653900 | -0.20996100 | 2.88548100  |
| C | -4.44453900 | 1.01944500  | 3.18007600  |
| H | -5.79710300 | 1.33034100  | 1.53053900  |
| H | -2.88296700 | 0.59283400  | 4.60287300  |
| H | -5.14330100 | 1.37553800  | 3.92745900  |
| C | -2.21425300 | -2.28827400 | -0.26435900 |
| C | -1.95707200 | -3.03218000 | -1.43281500 |
| C | -2.98899200 | -2.87224200 | 0.75646400  |
| C | -2.46532700 | -4.32497500 | -1.57049500 |
| H | -1.34288200 | -2.61849400 | -2.22128700 |
| C | -3.48459300 | -4.17018400 | 0.61352300  |
| H | -3.22383900 | -2.31031000 | 1.65183200  |
| C | -3.22525900 | -4.89909200 | -0.54847200 |
| H | -2.26764100 | -4.88195800 | -2.47914800 |
| H | -4.08524800 | -4.60324000 | 1.40489200  |
| H | -3.61864200 | -5.90234300 | -0.66060500 |
| C | 0.88987800  | 2.82058000  | 0.78400100  |
| C | 1.34258000  | 4.10432800  | 0.41809500  |
| C | 0.19177000  | 2.66561900  | 1.98999300  |
| C | 1.10183500  | 5.19831200  | 1.24878800  |
| H | 1.89300600  | 4.24562100  | -0.50531700 |
| C | -0.04972900 | 3.76485100  | 2.81875300  |
| H | -0.19149400 | 1.69270000  | 2.26379300  |
| C | 0.40636100  | 5.03093700  | 2.45048100  |
| H | 1.45571000  | 6.18062600  | 0.95900100  |
| H | -0.60298700 | 3.63171600  | 3.74127900  |
| H | 0.21888100  | 5.88428000  | 3.09104700  |
| C | 2.87668400  | 1.62160100  | -0.91026800 |
| C | 3.30715200  | 1.17952900  | -2.17513300 |
| C | 3.83319800  | 2.13273400  | -0.00925000 |

|    |             |             |             |
|----|-------------|-------------|-------------|
| C  | 4.65736800  | 1.25084000  | -2.52582200 |
| H  | 2.60351400  | 0.75502600  | -2.87817800 |
| C  | 5.18179100  | 2.19354700  | -0.36464000 |
| H  | 3.52176700  | 2.50884400  | 0.95860100  |
| C  | 5.59735100  | 1.75238500  | -1.62334600 |
| H  | 4.97222000  | 0.91310600  | -3.50636500 |
| H  | 5.90349800  | 2.59724400  | 0.33607500  |
| H  | 6.64334000  | 1.80609900  | -1.90037600 |
| Cl | 0.98837700  | -1.36320600 | -1.97907200 |
| C  | 1.42357800  | -0.90229200 | 2.69229300  |
| C  | 0.62001300  | -2.01576500 | 2.32517400  |
| C  | 1.02145100  | -2.92741200 | 1.31146100  |
| C  | 2.24210900  | -2.74456000 | 0.61307900  |
| C  | 2.98162100  | -1.55506300 | 0.87276500  |
| C  | 2.56555400  | -0.65172600 | 1.87865000  |
| H  | -0.29832300 | -2.21429700 | 2.86807900  |
| H  | 0.38243600  | -3.76959900 | 1.07241300  |
| H  | 3.86384300  | -1.32337300 | 0.29128100  |
| H  | 3.16348100  | 0.23411700  | 2.06545700  |
| C  | 1.19204600  | -0.10279600 | 3.94781200  |
| H  | 0.16201700  | -0.16538200 | 4.30305200  |
| H  | 1.83056800  | -0.50788300 | 4.74220900  |
| H  | 1.45552600  | 0.94881800  | 3.81601900  |
| C  | 2.69922000  | -3.79677000 | -0.38392700 |
| H  | 1.84256700  | -3.98941200 | -1.04082100 |
| C  | 3.88532900  | -3.37067300 | -1.25762200 |
| H  | 4.79500100  | -3.23023400 | -0.66225400 |
| H  | 4.09662300  | -4.15627000 | -1.98826000 |
| H  | 3.67328300  | -2.45068000 | -1.80711600 |
| C  | 3.02634700  | -5.10193400 | 0.37979700  |
| H  | 2.17480500  | -5.46872100 | 0.96012200  |
| H  | 3.30633300  | -5.88232200 | -0.33341200 |
| H  | 3.86804200  | -4.95670400 | 1.06539700  |

1\_Heq

Zero-point = -3162.973534

|    |             |             |             |
|----|-------------|-------------|-------------|
| Ru | -0.81743400 | 0.81147800  | 0.36370300  |
| P  | -1.18927100 | -1.39154000 | -0.33644700 |
| P  | 1.49324700  | 0.53134800  | -0.04402200 |
| C  | 1.86261800  | -0.40030100 | -1.60678300 |
| H  | 1.46085700  | 0.23195500  | -2.40212600 |
| H  | 2.95062400  | -0.39624500 | -1.69985000 |
| C  | -0.21710900 | -1.92347400 | -1.83486800 |
| C  | 1.33875500  | -1.85498000 | -1.80307600 |
| C  | 1.79835600  | -2.32311700 | -3.22331800 |
| H  | 1.59237500  | -3.39439600 | -3.32568800 |
| H  | 1.23058600  | -1.80985600 | -4.01122200 |
| P  | 3.58650200  | -2.05658400 | -3.63128600 |

|   |             |             |             |
|---|-------------|-------------|-------------|
| H | 3.79372100  | -3.01241300 | -4.65756900 |
| H | 3.55879100  | -0.84895800 | -4.37590600 |
| O | 4.56300000  | -2.07695000 | -2.48882600 |
| H | -0.52620000 | -2.95307500 | -2.04664400 |
| H | -0.58207400 | -1.29328500 | -2.64834400 |
| C | 1.91991800  | -2.84875500 | -0.77639100 |
| H | 1.67223200  | -2.58250500 | 0.24999000  |
| H | 1.51438300  | -3.84960700 | -0.95889400 |
| H | 3.00638000  | -2.89600300 | -0.86469800 |
| C | 2.61788400  | -0.20345900 | 1.21917200  |
| C | 3.88367000  | -0.70887300 | 0.85753200  |
| C | 2.27151500  | -0.17400200 | 2.57881900  |
| C | 4.75586300  | -1.18529700 | 1.83760600  |
| H | 4.20123400  | -0.75667900 | -0.17696300 |
| C | 3.14961000  | -0.64472500 | 3.55785000  |
| H | 1.31085400  | 0.22354300  | 2.87035600  |
| C | 4.39421400  | -1.15518000 | 3.18685400  |
| H | 5.72028800  | -1.57992600 | 1.54119200  |
| H | 2.86469700  | -0.60887100 | 4.60356500  |
| H | 5.07870200  | -1.52398200 | 3.94125700  |
| C | 2.30771900  | 2.16631200  | -0.32888900 |
| C | 2.04812000  | 2.91089300  | -1.49713900 |
| C | 3.16084000  | 2.71241400  | 0.64880200  |
| C | 2.63286000  | 4.16521300  | -1.67767100 |
| H | 1.37559700  | 2.52639100  | -2.25235500 |
| C | 3.73609500  | 3.97211500  | 0.46224400  |
| H | 3.39478900  | 2.15062000  | 1.54414200  |
| C | 3.47528200  | 4.70066100  | -0.69996700 |
| H | 2.43167400  | 4.72208100  | -2.58564300 |
| H | 4.40032400  | 4.37351600  | 1.21878500  |
| H | 3.93083800  | 5.67267200  | -0.84662600 |
| C | -0.99375100 | -2.79032200 | 0.83943600  |
| C | -1.49477100 | -4.06486600 | 0.50572900  |
| C | -0.28375700 | -2.63296600 | 2.03824600  |
| C | -1.28966300 | -5.14728700 | 1.36078400  |
| H | -2.05474100 | -4.20738500 | -0.41173200 |
| C | -0.07815600 | -3.72074900 | 2.89145100  |
| H | 0.13669800  | -1.66885900 | 2.28766500  |
| C | -0.58219900 | -4.97751700 | 2.55512000  |
| H | -1.68062000 | -6.12249100 | 1.09568900  |
| H | 0.48486400  | -3.58645300 | 3.80788700  |
| H | -0.42260900 | -5.82199700 | 3.21470700  |
| C | -2.94478800 | -1.55965900 | -0.87445500 |
| C | -3.36464600 | -1.12900400 | -2.14688300 |
| C | -3.91512400 | -2.01738500 | 0.04036700  |
| C | -4.71802000 | -1.15914700 | -2.49125600 |
| H | -2.64936200 | -0.74473700 | -2.86127300 |
| C | -5.26657900 | -2.03709200 | -0.30891600 |

|    |             |             |             |
|----|-------------|-------------|-------------|
| H  | -3.61333500 | -2.38439200 | 1.01474600  |
| C  | -5.67150000 | -1.60759400 | -1.57507800 |
| H  | -5.02476300 | -0.83095900 | -3.47759800 |
| H  | -5.99924500 | -2.39999700 | 0.40265700  |
| H  | -6.71992800 | -1.62945600 | -1.84719000 |
| Cl | -0.95478900 | 1.33366400  | -2.01525000 |
| C  | -1.38015300 | 0.99301100  | 2.66878300  |
| C  | -0.55420600 | 2.07779900  | 2.26591400  |
| C  | -0.94294300 | 2.97043400  | 1.23129300  |
| C  | -2.17394100 | 2.79703800  | 0.54727300  |
| C  | -2.93679600 | 1.63193500  | 0.84252800  |
| C  | -2.53217100 | 0.74579300  | 1.86904500  |
| H  | 0.37268900  | 2.27005800  | 2.79653500  |
| H  | -0.28937300 | 3.79387300  | 0.96847300  |
| H  | -3.82816100 | 1.40427500  | 0.27352400  |
| H  | -3.14828100 | -0.12095300 | 2.08417900  |
| C  | -1.16026800 | 0.22469600  | 3.94575000  |
| H  | -0.12872600 | 0.27851800  | 4.29775500  |
| H  | -1.78960000 | 0.66391500  | 4.72927100  |
| H  | -1.44382800 | -0.82508700 | 3.84439400  |
| C  | -2.61638300 | 3.83342800  | -0.47237100 |
| H  | -1.76085900 | 3.99215800  | -1.13967300 |
| C  | -3.81738500 | 3.41067300  | -1.32711200 |
| H  | -4.72580100 | 3.30599400  | -0.72253800 |
| H  | -4.01644900 | 4.18121700  | -2.07695800 |
| H  | -3.62968300 | 2.47193300  | -1.85330100 |
| C  | -2.91077100 | 5.16352000  | 0.26114300  |
| H  | -2.04730700 | 5.52675700  | 0.82568900  |
| H  | -3.18031500 | 5.93156300  | -0.46928800 |
| H  | -3.74996300 | 5.05258100  | 0.95616600  |
| H  | 1.64360200  | 5.71937200  | 1.81806400  |
| H  | 1.17234500  | 6.08439600  | 2.26323200  |

Ts1\*\_H2eq

Zero-point = -3162.931453

|    |             |             |             |
|----|-------------|-------------|-------------|
| Ru | -0.89186300 | 0.84687600  | 0.31963600  |
| P  | -1.02830000 | -1.37289300 | -0.40179600 |
| P  | 1.47410800  | 0.71451600  | 0.01024100  |
| C  | 1.98409500  | -0.24261700 | -1.50373500 |
| H  | 1.59295300  | 0.36070500  | -2.32661900 |
| H  | 3.07309900  | -0.16205800 | -1.53065000 |
| C  | 0.02666900  | -1.86399400 | -1.85352600 |
| C  | 1.56970600  | -1.71946000 | -1.74874500 |
| C  | 2.12021200  | -2.12694300 | -3.15564700 |
| H  | 1.98424600  | -3.20601000 | -3.28909600 |
| H  | 1.56086800  | -1.63017900 | -3.96006800 |
| P  | 3.90610700  | -1.74532900 | -3.46807900 |
| H  | 4.20941000  | -2.63680500 | -4.52794000 |

|   |             |             |             |
|---|-------------|-------------|-------------|
| H | 3.84340300  | -0.50549900 | -4.15534800 |
| O | 4.83029000  | -1.77077700 | -2.28329000 |
| H | -0.22986800 | -2.90798500 | -2.06480200 |
| H | -0.33328800 | -1.25669200 | -2.68639900 |
| C | 2.16917200  | -2.70214400 | -0.72166600 |
| H | 1.89681900  | -2.45780500 | 0.30276400  |
| H | 1.80643800  | -3.71591800 | -0.92194800 |
| H | 3.25769600  | -2.70692100 | -0.79543500 |
| C | 2.52738400  | 0.06842900  | 1.37988400  |
| C | 3.79923200  | -0.48343300 | 1.12942800  |
| C | 2.11828900  | 0.23511600  | 2.71310100  |
| C | 4.61407800  | -0.88073100 | 2.19138900  |
| H | 4.16932300  | -0.61726300 | 0.12022900  |
| C | 2.93988400  | -0.15479100 | 3.77345900  |
| H | 1.15639800  | 0.68367500  | 2.91814900  |
| C | 4.18887600  | -0.72076300 | 3.51237700  |
| H | 5.58586800  | -1.31100100 | 1.98092800  |
| H | 2.61045200  | -0.00951000 | 4.79645400  |
| H | 4.82994900  | -1.02662500 | 4.33043900  |
| C | 2.34236500  | 2.31120900  | -0.33227800 |
| C | 2.29020800  | 2.90656400  | -1.60709800 |
| C | 3.03634200  | 2.97129400  | 0.69722400  |
| C | 2.92969700  | 4.12335100  | -1.84375800 |
| H | 1.72269800  | 2.44773500  | -2.40671200 |
| C | 3.66635200  | 4.19424800  | 0.45474700  |
| H | 3.10627000  | 2.52560900  | 1.68159300  |
| C | 3.61814700  | 4.77100000  | -0.81497100 |
| H | 2.88431700  | 4.56780000  | -2.83114300 |
| H | 4.20472500  | 4.68650600  | 1.25615200  |
| H | 4.11403900  | 5.71569100  | -1.00306400 |
| C | -0.72716700 | -2.73188200 | 0.80236300  |
| C | -1.11000200 | -4.05104800 | 0.48224300  |
| C | -0.01405500 | -2.50436600 | 1.98806500  |
| C | -0.79678800 | -5.10416300 | 1.34125600  |
| H | -1.65843000 | -4.25398800 | -0.43043600 |
| C | 0.30156500  | -3.56312100 | 2.84426300  |
| H | 0.33146500  | -1.50853200 | 2.22591200  |
| C | -0.09217400 | -4.86269400 | 2.52471100  |
| H | -1.09884800 | -6.11284200 | 1.08535100  |
| H | 0.86711300  | -3.36975700 | 3.74846200  |
| H | 0.15338200  | -5.68448000 | 3.18655700  |
| C | -2.73660700 | -1.73056700 | -1.00680000 |
| C | -3.15154600 | -1.30801100 | -2.28465500 |
| C | -3.67733500 | -2.36177300 | -0.16698700 |
| C | -4.46860600 | -1.50965700 | -2.70335900 |
| H | -2.46316900 | -0.79659200 | -2.94290300 |
| C | -4.99396700 | -2.55324300 | -0.59038500 |
| H | -3.37690500 | -2.73349400 | 0.80561400  |



|    |             |             |             |
|----|-------------|-------------|-------------|
| C  | -5.39358000 | -2.12669100 | -1.85876100 |
| H  | -4.76918300 | -1.18253500 | -3.69189400 |
| H  | -5.70126700 | -3.04652100 | 0.06617800  |
| H  | -6.41404700 | -2.28090300 | -2.18817300 |
| Cl | -1.00061400 | 1.31455000  | -2.07147300 |
| C  | -1.68930800 | 0.72253400  | 2.63974400  |
| C  | -1.10359200 | 1.99971000  | 2.45712700  |
| C  | -1.62572200 | 2.92135000  | 1.52584100  |
| C  | -2.68456000 | 2.57993100  | 0.65330300  |
| C  | -3.17614300 | 1.24888800  | 0.72211600  |
| C  | -2.69390200 | 0.35713500  | 1.70630100  |
| H  | -0.30242200 | 2.32204900  | 3.11485200  |
| H  | -1.17820800 | 3.90468100  | 1.46298700  |
| H  | -3.94440600 | 0.91083500  | 0.03987300  |
| H  | -3.13873400 | -0.62892400 | 1.77397600  |
| C  | -1.41427700 | -0.12084800 | 3.85652600  |
| H  | -0.39637200 | 0.00275100  | 4.23097000  |
| H  | -2.09484600 | 0.19301700  | 4.65755400  |
| H  | -1.58789500 | -1.18108700 | 3.66710200  |
| C  | -3.23148700 | 3.61623500  | -0.31324100 |
| H  | -2.36329700 | 4.00401800  | -0.86285900 |
| C  | -4.22939500 | 3.05819300  | -1.33560800 |
| H  | -5.14873700 | 2.70753500  | -0.85223300 |
| H  | -4.51309600 | 3.85050300  | -2.03363300 |
| H  | -3.79799700 | 2.23965700  | -1.91682300 |
| C  | -3.85743800 | 4.78891400  | 0.47699800  |
| H  | -3.14973000 | 5.24932000  | 1.17235900  |
| H  | -4.19126200 | 5.56336000  | -0.21927200 |
| H  | -4.72850300 | 4.45452900  | 1.05053300  |
| H  | -0.26084400 | 2.87868400  | -0.34855000 |
| H  | -0.03591100 | 3.56620900  | -0.56459700 |

2\_H2eq

Zero-point = -3162.951069

|    |             |             |             |
|----|-------------|-------------|-------------|
| Ru | 0.69552500  | -0.75416400 | -0.00811300 |
| P  | 0.60741400  | 1.56490100  | -0.30561300 |
| P  | -1.57722600 | -0.93041000 | -0.20700800 |
| C  | -2.35342200 | 0.21177600  | -1.43484900 |
| H  | -1.94926300 | -0.13504100 | -2.39147600 |
| H  | -3.42533300 | -0.00625600 | -1.45193000 |
| C  | -0.65185800 | 2.14292500  | -1.54992200 |
| C  | -2.14482200 | 1.75347800  | -1.34950700 |
| C  | -2.90928900 | 2.34904300  | -2.57545900 |
| H  | -2.66202100 | 3.41208400  | -2.70201300 |
| H  | -2.60286800 | 1.83772300  | -3.49531500 |
| P  | -4.75313100 | 2.26126400  | -2.47098400 |
| H  | -5.09113200 | 3.46583200  | -1.80443600 |

|   |             |             |             |
|---|-------------|-------------|-------------|
| H | -5.12811300 | 2.55980100  | -3.80493800 |
| O | -5.33683600 | 1.01043000  | -1.87462700 |
| H | -0.56008400 | 3.23366000  | -1.59744400 |
| H | -0.31201600 | 1.74177400  | -2.50888700 |
| C | -2.71237800 | 2.37865900  | -0.05966000 |
| H | -2.20459900 | 2.02459300  | 0.83555400  |
| H | -2.60099500 | 3.46803000  | -0.08453900 |
| H | -3.77147500 | 2.14095000  | 0.06182600  |
| C | -2.50978500 | -0.75266400 | 1.36323400  |
| C | -3.87726000 | -0.41658700 | 1.37539900  |
| C | -1.86846800 | -1.05132100 | 2.57802100  |
| C | -4.56958500 | -0.35581200 | 2.58649500  |
| H | -4.40962500 | -0.20659500 | 0.45420400  |
| C | -2.56691100 | -0.99104300 | 3.78593200  |
| H | -0.82608800 | -1.35316300 | 2.57407200  |
| C | -3.91788500 | -0.63694300 | 3.79060100  |
| H | -5.62135400 | -0.09559700 | 2.58632900  |
| H | -2.06305800 | -1.22952100 | 4.71588900  |
| H | -4.46369800 | -0.59119700 | 4.72541600  |
| C | -2.11729600 | -2.58970200 | -0.79814600 |
| C | -1.85098000 | -3.00002500 | -2.11962400 |
| C | -2.77004400 | -3.48019100 | 0.07485000  |
| C | -2.23603200 | -4.26905100 | -2.55211000 |
| H | -1.32318700 | -2.34578300 | -2.80118400 |
| C | -3.14549000 | -4.75072400 | -0.36635400 |
| H | -2.99776200 | -3.18221400 | 1.09002000  |
| C | -2.88154200 | -5.14725700 | -1.67804400 |
| H | -2.02908400 | -4.57097400 | -3.57208300 |
| H | -3.65219600 | -5.42437900 | 0.31455800  |
| H | -3.17845100 | -6.13201000 | -2.01841900 |
| C | 0.34085500  | 2.63519800  | 1.16474100  |
| C | 0.52174600  | 4.02912800  | 1.07101500  |
| C | -0.09638000 | 2.08680900  | 2.38122200  |
| C | 0.27230200  | 4.84685500  | 2.17299100  |
| H | 0.87233200  | 4.47140700  | 0.14511200  |
| C | -0.34653000 | 2.90993300  | 3.48236400  |
| H | -0.27741300 | 1.02209400  | 2.46165700  |
| C | -0.16079200 | 4.28926100  | 3.38011700  |
| H | 0.41696600  | 5.91760000  | 2.09116700  |
| H | -0.69484800 | 2.47392000  | 4.41157300  |
| H | -0.35416400 | 4.92834100  | 4.23324300  |
| C | 2.19507000  | 2.20673100  | -0.98668400 |
| C | 2.47595500  | 2.15907600  | -2.36454600 |
| C | 3.19444500  | 2.66937200  | -0.10613300 |
| C | 3.71866000  | 2.57528300  | -2.84654900 |
| H | 1.74481600  | 1.77612000  | -3.06343400 |
| C | 4.43726300  | 3.07531500  | -0.59471400 |
| H | 2.99646500  | 2.73396000  | 0.95743700  |

|    |            |             |             |
|----|------------|-------------|-------------|
| C  | 4.70164100 | 3.03127500  | -1.96596900 |
| H  | 3.91758300 | 2.53806200  | -3.91112100 |
| H  | 5.19256700 | 3.43480900  | 0.09436700  |
| H  | 5.66419100 | 3.35340100  | -2.34469500 |
| C  | 2.20580400 | -1.59703500 | 2.67724400  |
| C  | 2.68940900 | -2.88443800 | 2.36125000  |
| C  | 3.46868400 | -3.10559000 | 1.23486900  |
| C  | 3.80529400 | -2.06182300 | 0.34507200  |
| C  | 3.30323500 | -0.78227800 | 0.63072400  |
| C  | 2.51368900 | -0.55032000 | 1.78481300  |
| H  | 2.47064000 | -3.71199800 | 3.03137600  |
| H  | 3.84065400 | -4.10744600 | 1.03661400  |
| H  | 3.59055100 | 0.06410300  | 0.01850700  |
| H  | 2.28181400 | 0.47147200  | 2.07272400  |
| C  | 1.52146000 | -1.34257100 | 3.99835900  |
| H  | 0.78881200 | -2.12109200 | 4.23380600  |
| H  | 2.26010800 | -1.34774400 | 4.80876600  |
| H  | 1.02212800 | -0.37122900 | 4.02140700  |
| C  | 4.75145400 | -2.34592100 | -0.81346000 |
| H  | 4.41765200 | -3.29074600 | -1.26497800 |
| C  | 4.75092300 | -1.27455700 | -1.91114500 |
| H  | 5.15825100 | -0.32341100 | -1.55081600 |
| H  | 5.38422600 | -1.60247200 | -2.74071700 |
| H  | 3.74636100 | -1.09302700 | -2.30158700 |
| C  | 6.18201500 | -2.57481800 | -0.27330900 |
| H  | 6.21728400 | -3.37297900 | 0.47408700  |
| H  | 6.85306200 | -2.85028500 | -1.09246300 |
| H  | 6.57097300 | -1.66156200 | 0.19012900  |
| H  | 0.59092800 | -2.54786100 | 0.38664200  |
| H  | 1.03408500 | -2.53488500 | -0.27508300 |
| Cl | 0.87783300 | -0.91373600 | -2.38233100 |

Ts2\_H2eq

Zero-point = -3162.892622

|    |             |             |             |
|----|-------------|-------------|-------------|
| Ru | 0.62868200  | -0.72917400 | 0.12555200  |
| P  | 0.62934900  | 1.65089700  | -0.37704100 |
| P  | -1.61560800 | -0.90283400 | -0.16839800 |
| C  | -2.38794600 | 0.31151000  | -1.33384700 |
| H  | -1.97976800 | 0.04499500  | -2.31681900 |
| H  | -3.45904300 | 0.09217800  | -1.37077700 |
| C  | -0.74970500 | 2.28560000  | -1.47257300 |
| C  | -2.20431700 | 1.84603000  | -1.14269800 |
| C  | -3.10714500 | 2.52630300  | -2.22074700 |
| H  | -2.91181600 | 3.60722300  | -2.25385900 |
| H  | -2.86920600 | 2.13020100  | -3.21553900 |
| P  | -4.92837100 | 2.34410900  | -1.98702700 |
| H  | -5.24053800 | 3.36298400  | -1.05312000 |

|   |             |             |             |
|---|-------------|-------------|-------------|
| H | -5.41874300 | 2.90371200  | -3.19379900 |
| O | -5.43030600 | 0.96942200  | -1.63974800 |
| H | -0.68495200 | 3.37907800  | -1.47205200 |
| H | -0.51779400 | 1.95742900  | -2.49120900 |
| C | -2.63538500 | 2.33482900  | 0.25278600  |
| H | -1.99809800 | 1.93935300  | 1.04279200  |
| H | -2.58217200 | 3.42718400  | 0.30962800  |
| H | -3.65503700 | 2.02064700  | 0.48937000  |
| C | -2.58452300 | -0.82382400 | 1.38666900  |
| C | -3.98347700 | -0.66798300 | 1.37658600  |
| C | -1.91626100 | -0.97173800 | 2.61277300  |
| C | -4.68721700 | -0.64262900 | 2.58147300  |
| H | -4.52751100 | -0.55868100 | 0.44431200  |
| C | -2.62729400 | -0.94580800 | 3.81499900  |
| H | -0.84194900 | -1.12958600 | 2.62197100  |
| C | -4.01301700 | -0.77774000 | 3.79918100  |
| H | -5.76386400 | -0.52147600 | 2.56801600  |
| H | -2.10391400 | -1.06485100 | 4.75705200  |
| H | -4.56782000 | -0.75961300 | 4.72965600  |
| C | -2.16235000 | -2.51573100 | -0.88610600 |
| C | -2.87127400 | -2.63089300 | -2.09366400 |
| C | -1.84872300 | -3.68814200 | -0.16806100 |
| C | -3.24408700 | -3.88933500 | -2.57666300 |
| H | -3.15329900 | -1.75472600 | -2.66172700 |
| C | -2.22556800 | -4.93885200 | -0.65388000 |
| H | -1.31115700 | -3.61752900 | 0.77109300  |
| C | -2.92076400 | -5.04265500 | -1.86294700 |
| H | -3.79377800 | -3.96168800 | -3.50765500 |
| H | -1.98387800 | -5.83062800 | -0.08738400 |
| H | -3.21359600 | -6.01530000 | -2.23957000 |
| C | 0.63853700  | 2.88382900  | 0.99361900  |
| C | 0.93840800  | 4.24002500  | 0.76243400  |
| C | 0.28319300  | 2.48080800  | 2.29213100  |
| C | 0.89072400  | 5.16185100  | 1.80859000  |
| H | 1.22340200  | 4.57072900  | -0.23038200 |
| C | 0.23246600  | 3.40684500  | 3.33727900  |
| H | 0.01924500  | 1.44526700  | 2.48136100  |
| C | 0.53966400  | 4.74697200  | 3.09693700  |
| H | 1.12765000  | 6.20235100  | 1.62003600  |
| H | -0.05005000 | 3.08356000  | 4.33259000  |
| H | 0.50378300  | 5.46586200  | 3.90663200  |
| C | 2.13235900  | 2.10271700  | -1.35134000 |
| C | 2.20273900  | 1.84972100  | -2.73474700 |
| C | 3.29230100  | 2.55859600  | -0.69293200 |
| C | 3.39021000  | 2.06072200  | -3.43915900 |
| H | 1.33455800  | 1.49169000  | -3.27718600 |
| C | 4.47782200  | 2.76484700  | -1.40154300 |
| H | 3.26340300  | 2.77260300  | 0.36938100  |

|    |            |             |             |
|----|------------|-------------|-------------|
| C  | 4.53038300 | 2.51835000  | -2.77570900 |
| H  | 3.42152500 | 1.87224800  | -4.50610400 |
| H  | 5.35624600 | 3.12851600  | -0.88091000 |
| H  | 5.44898200 | 2.68642000  | -3.32468900 |
| C  | 2.15382200 | -1.46218500 | 2.81742500  |
| C  | 2.65249500 | -2.75909300 | 2.58789900  |
| C  | 3.43934700 | -3.04423400 | 1.48160400  |
| C  | 3.76043300 | -2.06010300 | 0.52585000  |
| C  | 3.22934600 | -0.77276400 | 0.71473100  |
| C  | 2.44670100 | -0.47119500 | 1.85851100  |
| H  | 2.44215300 | -3.54319300 | 3.31085800  |
| H  | 3.82866000 | -4.05113000 | 1.35621400  |
| H  | 3.51689300 | 0.03521600  | 0.05171300  |
| H  | 2.22589500 | 0.56753700  | 2.08712000  |
| C  | 1.45509000 | -1.13398800 | 4.11464300  |
| H  | 0.68731500 | -1.87500800 | 4.35967700  |
| H  | 2.17389500 | -1.13604500 | 4.94254600  |
| H  | 0.99008500 | -0.14540700 | 4.09135400  |
| C  | 4.72599700 | -2.40629300 | -0.60240400 |
| H  | 4.35406100 | -3.33373800 | -1.06250100 |
| C  | 4.83180300 | -1.34302500 | -1.70279200 |
| H  | 5.28012100 | -0.41667800 | -1.32849700 |
| H  | 5.47323100 | -1.71079500 | -2.50899200 |
| H  | 3.85987500 | -1.09333700 | -2.13532500 |
| C  | 6.12728500 | -2.71368500 | -0.02617700 |
| H  | 6.10011200 | -3.51081600 | 0.72177800  |
| H  | 6.80441100 | -3.02695800 | -0.82672400 |
| H  | 6.55266100 | -1.82240300 | 0.44774200  |
| H  | 0.65511600 | -2.33382600 | 0.41331500  |
| H  | 0.82035800 | -2.59712800 | -1.41317400 |
| Cl | 0.96775400 | -1.57039500 | -2.22096100 |

### 3\_H2eq

Zero-point = -3162.897332

|    |             |             |             |
|----|-------------|-------------|-------------|
| Ru | 0.61286300  | -0.70359900 | 0.22974100  |
| P  | 0.64124600  | 1.64601200  | -0.45150600 |
| P  | -1.62387500 | -0.91072100 | -0.08272000 |
| C  | -2.41478600 | 0.29504700  | -1.24910800 |
| H  | -2.05646600 | -0.01571300 | -2.23883300 |
| H  | -3.48885400 | 0.10389600  | -1.23935100 |
| C  | -0.77138500 | 2.25109900  | -1.52080100 |
| C  | -2.21213100 | 1.83132700  | -1.11492900 |
| C  | -3.15807600 | 2.48201200  | -2.17482500 |
| H  | -2.98277200 | 3.56556000  | -2.22875100 |
| H  | -2.94069700 | 2.07564800  | -3.17020400 |
| P  | -4.96989400 | 2.27188300  | -1.89719000 |
| H  | -5.28244700 | 3.28690400  | -0.95987000 |
| H  | -5.49905100 | 2.81443900  | -3.09467000 |

|   |             |             |             |
|---|-------------|-------------|-------------|
| O | -5.44453500 | 0.88930500  | -1.53374500 |
| H | -0.70202500 | 3.34343700  | -1.56521000 |
| H | -0.58193100 | 1.88080900  | -2.53380800 |
| C | -2.58340400 | 2.35893000  | 0.28321500  |
| H | -1.92967400 | 1.95901000  | 1.05779900  |
| H | -2.50046500 | 3.45013800  | 0.31945600  |
| H | -3.60227200 | 2.07713400  | 0.56135500  |
| C | -2.60923900 | -0.87645400 | 1.46357900  |
| C | -3.99146100 | -0.60924300 | 1.47376200  |
| C | -1.95409900 | -1.16496700 | 2.67420900  |
| C | -4.69122800 | -0.61613800 | 2.68166600  |
| H | -4.52990700 | -0.39045500 | 0.55779700  |
| C | -2.66148700 | -1.16560400 | 3.87825500  |
| H | -0.89662900 | -1.41297400 | 2.66359700  |
| C | -4.02987300 | -0.88847700 | 3.88273100  |
| H | -5.75539100 | -0.41190200 | 2.68243500  |
| H | -2.14937000 | -1.39258800 | 4.80640400  |
| H | -4.58126300 | -0.89272400 | 4.81540000  |
| C | -2.14460800 | -2.50489000 | -0.89412600 |
| C | -3.30730000 | -2.59856700 | -1.68284100 |
| C | -1.35502400 | -3.66460600 | -0.72272500 |
| C | -3.65422700 | -3.80664400 | -2.29321100 |
| H | -3.95974200 | -1.74653000 | -1.82499800 |
| C | -1.70623900 | -4.86782900 | -1.34501700 |
| H | -0.49686000 | -3.62930400 | -0.05726900 |
| C | -2.85275400 | -4.93923700 | -2.13700900 |
| H | -4.55616100 | -3.85897600 | -2.89162200 |
| H | -1.09034300 | -5.74737000 | -1.19576300 |
| H | -3.12619200 | -5.87024300 | -2.61846000 |
| C | 0.70340300  | 2.94335400  | 0.85928400  |
| C | 1.00930500  | 4.28426400  | 0.55803800  |
| C | 0.37738100  | 2.60606600  | 2.18422900  |
| C | 0.99738500  | 5.25442300  | 1.56082000  |
| H | 1.27093800  | 4.56560800  | -0.45619100 |
| C | 0.36243300  | 3.57978400  | 3.18623200  |
| H | 0.11092800  | 1.58258600  | 2.42999700  |
| C | 0.67600400  | 4.90399100  | 2.87570900  |
| H | 1.23920500  | 6.28241800  | 1.31767100  |
| H | 0.10347900  | 3.30575900  | 4.20253500  |
| H | 0.66830700  | 5.66003800  | 3.65162200  |
| C | 2.11377500  | 2.04049200  | -1.49588800 |
| C | 2.13660600  | 1.71134300  | -2.86487400 |
| C | 3.29686000  | 2.52373500  | -0.90197800 |
| C | 3.30097700  | 1.87544900  | -3.61827200 |
| H | 1.25027100  | 1.32446000  | -3.35548000 |
| C | 4.45959800  | 2.68224400  | -1.65954700 |
| H | 3.30474300  | 2.79524800  | 0.14742000  |
| C | 4.46524000  | 2.36072200  | -3.01883600 |

|    |            |             |             |
|----|------------|-------------|-------------|
| H  | 3.29605900 | 1.62796100  | -4.67356800 |
| H  | 5.35696500 | 3.06658400  | -1.18842200 |
| H  | 5.36616800 | 2.49119400  | -3.60600000 |
| C  | 2.22372900 | -1.28567300 | 2.93079200  |
| C  | 2.71081100 | -2.59487800 | 2.76945800  |
| C  | 3.44856300 | -2.95836000 | 1.65047900  |
| C  | 3.73460600 | -2.04326500 | 0.62017300  |
| C  | 3.21999700 | -0.74056700 | 0.74774900  |
| C  | 2.48395700 | -0.36141600 | 1.89809900  |
| H  | 2.52683400 | -3.32949800 | 3.54940500  |
| H  | 3.82604900 | -3.97471100 | 1.57652800  |
| H  | 3.49281100 | 0.02303400  | 0.02816000  |
| H  | 2.27508500 | 0.69101700  | 2.06696200  |
| C  | 1.55208900 | -0.87121800 | 4.21767100  |
| H  | 0.78480100 | -1.59036600 | 4.52217000  |
| H  | 2.28363600 | -0.82333400 | 5.03289800  |
| H  | 1.08796000 | 0.11478200  | 4.13772200  |
| C  | 4.64656000 | -2.47089300 | -0.52536400 |
| H  | 4.22092800 | -3.39798700 | -0.93683700 |
| C  | 4.75648300 | -1.45552600 | -1.66978400 |
| H  | 5.24367900 | -0.53010400 | -1.34487500 |
| H  | 5.36335100 | -1.87542500 | -2.47727900 |
| H  | 3.78292100 | -1.19108600 | -2.08951200 |
| C  | 6.05593100 | -2.81163700 | 0.01047300  |
| H  | 6.02820200 | -3.57837500 | 0.78934600  |
| H  | 6.68982400 | -3.18138500 | -0.80138400 |
| H  | 6.53308900 | -1.92083900 | 0.43329200  |
| H  | 0.62650500 | -2.23456100 | 0.70897200  |
| H  | 0.10044000 | -2.65243300 | -1.91512200 |
| Cl | 0.93807200 | -1.63715700 | -2.00398800 |

1\_H2ax

Zero-point= -3162.973764

|    |             |             |             |
|----|-------------|-------------|-------------|
| Ru | -0.91236500 | 0.75198500  | 0.39502000  |
| P  | -1.01869400 | -1.45700100 | -0.37403900 |
| P  | 1.41152700  | 0.76939800  | -0.02359500 |
| C  | 1.88608200  | -0.06271600 | -1.61281900 |
| H  | 1.40589100  | 0.53604200  | -2.39012600 |
| H  | 2.96500200  | 0.07669500  | -1.70665800 |
| C  | 0.00861500  | -1.82319700 | -1.88518700 |
| C  | 1.54448400  | -1.56494900 | -1.84898700 |
| C  | 2.05551200  | -1.93454800 | -3.28065400 |
| H  | 1.98402000  | -3.02001600 | -3.41158500 |
| H  | 1.42641400  | -1.47515900 | -4.05512000 |
| P  | 3.79570800  | -1.43718200 | -3.68081500 |
| H  | 4.11822200  | -2.33517300 | -4.72933900 |
| H  | 3.61548300  | -0.22534500 | -4.39689600 |



|   |             |             |             |
|---|-------------|-------------|-------------|
| O | 4.76989400  | -1.36197300 | -2.53875700 |
| H | -0.17222900 | -2.87649300 | -2.12662600 |
| H | -0.43228900 | -1.21968500 | -2.68113600 |
| C | 2.24594100  | -2.50570300 | -0.84803700 |
| H | 1.96516700  | -2.30270500 | 0.18445100  |
| H | 1.97215600  | -3.54449700 | -1.06066900 |
| H | 3.32973400  | -2.41137200 | -0.93191500 |
| C | 2.62647800  | 0.14688200  | 1.21548500  |
| C | 3.94722800  | -0.17181200 | 0.83810000  |
| C | 2.28222900  | 0.07876400  | 2.57414200  |
| C | 4.87737600  | -0.56411300 | 1.80192900  |
| H | 4.26520400  | -0.13930000 | -0.19686400 |
| C | 3.21750600  | -0.30737200 | 3.53713600  |
| H | 1.27751300  | 0.33291400  | 2.87718600  |
| C | 4.51806000  | -0.63304900 | 3.15041700  |
| H | 5.88491000  | -0.81598300 | 1.49352200  |
| H | 2.93274400  | -0.34978200 | 4.58265100  |
| H | 5.24730400  | -0.93583300 | 3.89215700  |
| C | 2.00028000  | 2.50501800  | -0.25384900 |
| C | 1.67979900  | 3.23471800  | -1.41555600 |
| C | 2.72185300  | 3.14432400  | 0.77284600  |
| C | 2.07485700  | 4.56770000  | -1.54104400 |
| H | 1.10337100  | 2.77715500  | -2.20826800 |
| C | 3.10374800  | 4.48135700  | 0.64221700  |
| H | 3.00452800  | 2.59653400  | 1.66317900  |
| C | 2.78252500  | 5.19580500  | -0.51328200 |
| H | 1.82976800  | 5.11393700  | -2.44464500 |
| H | 3.66490900  | 4.95724900  | 1.43797000  |
| H | 3.08792000  | 6.23022200  | -0.61596800 |
| C | -0.65703800 | -2.85839100 | 0.75916800  |
| C | -1.00154800 | -4.17294300 | 0.38566100  |
| C | 0.02567100  | -2.65260100 | 1.96646500  |
| C | -0.67292900 | -5.24791400 | 1.21146100  |
| H | -1.53753000 | -4.35437200 | -0.53921500 |
| C | 0.35657200  | -3.73215300 | 2.78998800  |
| H | 0.32665100  | -1.65250700 | 2.24516300  |
| C | 0.00513200  | -5.02991500 | 2.41562000  |
| H | -0.94583400 | -6.25439400 | 0.91716200  |
| H | 0.89674300  | -3.55882300 | 3.71355700  |
| H | 0.25832700  | -5.86792600 | 3.05387600  |
| C | -2.74239400 | -1.81680600 | -0.92029900 |
| C | -3.21261000 | -1.40323200 | -2.18065000 |
| C | -3.64980000 | -2.41231400 | -0.02039600 |
| C | -4.55329800 | -1.58472200 | -2.52815000 |
| H | -2.54927900 | -0.91668400 | -2.88269800 |
| C | -4.98979400 | -2.58314700 | -0.37244100 |
| H | -3.30473500 | -2.76781700 | 0.94380000  |
| C | -5.44502800 | -2.16952000 | -1.62678900 |

|    |             |             |             |
|----|-------------|-------------|-------------|
| H  | -4.89854400 | -1.26770200 | -3.50537400 |
| H  | -5.67285700 | -3.05072400 | 0.32729100  |
| H  | -6.48375700 | -2.30869100 | -1.90136800 |
| C  | -1.47589800 | 0.80798300  | 2.70760300  |
| C  | -0.79122400 | 1.99425200  | 2.32574900  |
| C  | -1.29432100 | 2.85565400  | 1.31458900  |
| C  | -2.50182500 | 2.54943700  | 0.63432200  |
| C  | -3.11433000 | 1.29386700  | 0.90579700  |
| C  | -2.59539300 | 0.44014800  | 1.90839800  |
| H  | 0.11081800  | 2.28459300  | 2.85462600  |
| H  | -0.74641500 | 3.75655700  | 1.06405600  |
| H  | -3.97636600 | 0.97249800  | 0.33679800  |
| H  | -3.09964600 | -0.49985000 | 2.10704700  |
| C  | -1.15493300 | 0.04445900  | 3.96602500  |
| H  | -1.30278100 | -1.03034300 | 3.84054900  |
| H  | -0.13763100 | 0.22198700  | 4.31881600  |
| H  | -1.83243100 | 0.38133900  | 4.75997800  |
| C  | -3.07660200 | 3.54828000  | -0.35608100 |
| H  | -2.25104600 | 3.83297700  | -1.01918800 |
| C  | -4.21792800 | 2.99979200  | -1.22095800 |
| H  | -5.10369800 | 2.76584500  | -0.61898500 |
| H  | -4.51535500 | 3.75810300  | -1.95044300 |
| H  | -3.91519000 | 2.10599500  | -1.77128700 |
| C  | -3.53404700 | 4.80931200  | 0.41504100  |
| H  | -2.72094900 | 5.26322000  | 0.98888600  |
| H  | -3.90216600 | 5.55706200  | -0.29307400 |
| H  | -4.34905500 | 4.57353300  | 1.10767700  |
| H  | 2.52096000  | -6.10231000 | 0.81091400  |
| H  | 3.12446000  | -6.47056700 | 0.58191400  |
| Cl | -1.11680400 | 1.32588300  | -1.96692500 |

Ts1\*\_H2ax

Zero-point = -3162.925475

|    |             |             |             |
|----|-------------|-------------|-------------|
| Ru | -0.54500500 | 0.88295500  | 0.44121600  |
| P  | -1.40322400 | -1.21785700 | -0.26879700 |
| P  | 1.70891300  | 0.33711000  | -0.09289400 |
| C  | 1.86427900  | -0.83257600 | -1.52428500 |
| H  | 1.52926200  | -0.26556100 | -2.39530000 |
| H  | 2.93525700  | -1.00733400 | -1.63896200 |
| C  | -0.43005300 | -1.98790400 | -1.65654300 |
| C  | 1.10494100  | -2.19286600 | -1.49118600 |
| C  | 1.53511500  | -3.00882500 | -2.75489700 |
| H  | 1.14127400  | -4.02735900 | -2.66472900 |
| H  | 1.09991000  | -2.57822200 | -3.66719700 |
| P  | 3.35284900  | -3.14665100 | -3.07841600 |
| H  | 3.41512600  | -4.31369500 | -3.88046100 |
| H  | 3.57740000  | -2.13131500 | -4.04389500 |
| O  | 4.26605500  | -3.10381400 | -1.88568400 |

|   |             |             |             |
|---|-------------|-------------|-------------|
| H | -0.89728600 | -2.94896900 | -1.88750100 |
| H | -0.60395200 | -1.33702700 | -2.51559200 |
| C | 1.42661800  | -3.03578500 | -0.24115800 |
| H | 1.16073800  | -2.51898200 | 0.68356500  |
| H | 0.85945200  | -3.97151300 | -0.26335300 |
| H | 2.48941000  | -3.27800800 | -0.20116100 |
| C | 2.89234100  | -0.29012800 | 1.18233800  |
| C | 3.99117000  | -1.09714300 | 0.82816300  |
| C | 2.78395200  | 0.14188100  | 2.51750000  |
| C | 4.93819700  | -1.46100500 | 1.78922000  |
| H | 4.12838900  | -1.47556600 | -0.17685700 |
| C | 3.73699900  | -0.21734600 | 3.47091500  |
| H | 1.94610900  | 0.75321900  | 2.81945100  |
| C | 4.81797500  | -1.02311800 | 3.10812400  |
| H | 5.76982600  | -2.09015600 | 1.49554200  |
| H | 3.63343700  | 0.12749900  | 4.49349500  |
| H | 5.55746600  | -1.30759000 | 3.84695100  |
| C | 2.61282700  | 1.84868100  | -0.66469300 |
| C | 2.50986900  | 2.33006700  | -1.98361500 |
| C | 3.38951400  | 2.57681900  | 0.25928900  |
| C | 3.15653700  | 3.50939600  | -2.35929200 |
| H | 1.91315400  | 1.80650000  | -2.71617000 |
| C | 4.02238500  | 3.76135000  | -0.12089000 |
| H | 3.52946100  | 2.20234000  | 1.26569100  |
| C | 3.90643600  | 4.23249500  | -1.43021400 |
| H | 3.07241700  | 3.86036500  | -3.38123100 |
| H | 4.62210400  | 4.30281600  | 0.60150900  |
| H | 4.40621700  | 5.14689900  | -1.72657700 |
| C | -1.76482300 | -2.60342700 | 0.90551300  |
| C | -2.05648200 | -3.88434000 | 0.39395700  |
| C | -1.88434600 | -2.39887500 | 2.29014300  |
| C | -2.41924700 | -4.92723500 | 1.24518100  |
| H | -2.02823900 | -4.07274400 | -0.67190000 |
| C | -2.25357200 | -3.44441600 | 3.14097700  |
| H | -1.68063500 | -1.42706100 | 2.71304600  |
| C | -2.51332500 | -4.71235500 | 2.62247500  |
| H | -2.63716100 | -5.90476200 | 0.83167700  |
| H | -2.33512600 | -3.26571100 | 4.20695700  |
| H | -2.79455500 | -5.52439100 | 3.28189600  |
| C | -3.09158300 | -0.99595400 | -0.99238700 |
| C | -3.30386500 | -0.65149800 | -2.33915100 |
| C | -4.20942000 | -1.11875500 | -0.14176600 |
| C | -4.59854200 | -0.43133600 | -2.81709100 |
| H | -2.47054800 | -0.53351200 | -3.01691300 |
| C | -5.49817300 | -0.88484900 | -0.62300200 |
| H | -4.07643400 | -1.42532500 | 0.88945400  |
| C | -5.69634100 | -0.53971800 | -1.96227200 |
| H | -4.74496700 | -0.17484000 | -3.85986100 |

|    |             |             |             |
|----|-------------|-------------|-------------|
| H  | -6.34681700 | -0.99125900 | 0.04285700  |
| H  | -6.69795700 | -0.36766500 | -2.33760700 |
| C  | -0.83564600 | 1.57702500  | 2.82230800  |
| C  | -0.00295300 | 2.47242300  | 2.09207200  |
| C  | -0.47564900 | 3.16411300  | 0.95515900  |
| C  | -1.81420000 | 2.98850300  | 0.49366300  |
| C  | -2.57222900 | 1.96022500  | 1.08998900  |
| C  | -2.07500800 | 1.25588700  | 2.22216600  |
| H  | 0.99471600  | 2.69540500  | 2.45491500  |
| H  | 0.18025400  | 3.86298200  | 0.44836600  |
| H  | -3.55177700 | 1.70854800  | 0.70489800  |
| H  | -2.71982100 | 0.52175200  | 2.69400300  |
| C  | -0.41907000 | 0.97922400  | 4.13569100  |
| H  | 0.01126800  | -0.02279900 | 4.00349400  |
| H  | 0.32913700  | 1.60224200  | 4.63182300  |
| H  | -1.27772400 | 0.88633000  | 4.80595500  |
| C  | -2.35138900 | 3.88744800  | -0.60306200 |
| H  | -1.56818000 | 3.94410800  | -1.36754600 |
| C  | -3.63522600 | 3.37889000  | -1.26832400 |
| H  | -4.48179200 | 3.38377900  | -0.57205300 |
| H  | -3.89886900 | 4.03994300  | -2.09856300 |
| H  | -3.51273500 | 2.36940600  | -1.66783500 |
| C  | -2.55537200 | 5.30601900  | -0.01818200 |
| H  | -1.63443100 | 5.71327300  | 0.40978700  |
| H  | -2.88478300 | 5.98356800  | -0.81099200 |
| H  | -3.32262200 | 5.30441900  | 0.76335600  |
| H  | 0.42334600  | -1.03846300 | 2.33586000  |
| H  | 0.15850300  | -0.55032700 | 1.80003500  |
| Cl | -0.65525600 | 1.34942900  | -1.93092600 |

## 2\_H2ax

Zero-point = -3162.96896

|    |             |             |             |
|----|-------------|-------------|-------------|
| Ru | -0.58438900 | 0.80391200  | -0.25519700 |
| P  | -0.79450400 | -1.46804000 | -0.27967600 |
| P  | 1.66066600  | 0.57279600  | 0.03085200  |
| C  | 2.42536600  | -0.59891200 | -1.18128900 |
| H  | 2.19207500  | -0.17234600 | -2.16054500 |
| H  | 3.50743700  | -0.53751400 | -1.02861800 |
| C  | 0.47559200  | -2.31416400 | -1.34908900 |
| C  | 2.01050400  | -2.09918700 | -1.16012000 |
| C  | 2.66586000  | -2.77830400 | -2.40778000 |
| H  | 2.53995500  | -3.86395300 | -2.32835000 |
| H  | 2.16532500  | -2.46404700 | -3.33382100 |
| P  | 4.46752700  | -2.44758100 | -2.67694000 |
| H  | 4.81227600  | -3.50310700 | -3.55901400 |
| H  | 4.44655600  | -1.33955400 | -3.56408200 |
| O  | 5.32532200  | -2.27561200 | -1.45751200 |
| H  | 0.25187000  | -3.38659000 | -1.33585600 |

|   |             |             |             |
|---|-------------|-------------|-------------|
| H | 0.19015700  | -1.95514900 | -2.34333300 |
| C | 2.54521300  | -2.81397300 | 0.09822200  |
| H | 2.08334400  | -2.44975900 | 1.01586100  |
| H | 2.35190500  | -3.88987900 | 0.02759800  |
| H | 3.62585400  | -2.67811000 | 0.17533400  |
| C | 2.37611900  | 0.11948600  | 1.65767800  |
| C | 3.78002300  | 0.01884000  | 1.76710700  |
| C | 1.58634600  | -0.14424200 | 2.78647000  |
| C | 4.36707800  | -0.34156600 | 2.97798900  |
| H | 4.41553400  | 0.22364300  | 0.91316100  |
| C | 2.18188400  | -0.50429100 | 3.99922000  |
| H | 0.50792100  | -0.09664100 | 2.72852000  |
| C | 3.56929300  | -0.60436600 | 4.09641300  |
| H | 5.44533500  | -0.41944400 | 3.04723300  |
| H | 1.55773700  | -0.71188500 | 4.86033100  |
| H | 4.02972300  | -0.88643400 | 5.03557700  |
| C | 2.45781400  | 2.18811600  | -0.33847200 |
| C | 2.55948800  | 2.65872100  | -1.66305000 |
| C | 2.92952600  | 2.99865300  | 0.71328800  |
| C | 3.13697100  | 3.90155200  | -1.92432100 |
| H | 2.16753300  | 2.07360700  | -2.48513400 |
| C | 3.50280700  | 4.24272600  | 0.44112200  |
| H | 2.86879700  | 2.65162600  | 1.73728900  |
| C | 3.61011100  | 4.69501600  | -0.87555800 |
| H | 3.21675900  | 4.24900700  | -2.94769300 |
| H | 3.87120100  | 4.85211800  | 1.25804600  |
| H | 4.06000700  | 5.65827100  | -1.08400600 |
| C | -0.89170200 | -2.33955800 | 1.33850900  |
| C | -0.35269100 | -3.62447000 | 1.52239200  |
| C | -1.62307200 | -1.76283300 | 2.39552700  |
| C | -0.50575200 | -4.29392200 | 2.73913800  |
| H | 0.18549500  | -4.11397500 | 0.72320100  |
| C | -1.77942300 | -2.43515300 | 3.60770900  |
| H | -2.09858100 | -0.79651500 | 2.26850400  |
| C | -1.21202800 | -3.69984100 | 3.78550000  |
| H | -0.07625000 | -5.28070200 | 2.86386700  |
| H | -2.35091800 | -1.97734700 | 4.40688800  |
| H | -1.33053300 | -4.22165000 | 4.72737300  |
| C | -2.37557000 | -1.98814500 | -1.08377600 |
| C | -2.70032300 | -1.52796200 | -2.37685200 |
| C | -3.26366800 | -2.86452900 | -0.42995400 |
| C | -3.88260100 | -1.93895300 | -2.99429600 |
| H | -2.03937000 | -0.84397700 | -2.89456700 |
| C | -4.44454300 | -3.26768600 | -1.05655700 |
| H | -3.03559400 | -3.23801400 | 0.55894700  |
| C | -4.75794900 | -2.80665900 | -2.33631200 |
| H | -4.11666600 | -1.58067100 | -3.99014900 |
| H | -5.11514800 | -3.94685000 | -0.54341400 |

|    |             |             |             |
|----|-------------|-------------|-------------|
| H  | -5.67486500 | -3.12339800 | -2.81884000 |
| C  | -1.36960200 | 3.89701000  | 0.76717300  |
| C  | -1.49388100 | 3.25374000  | -0.48013900 |
| C  | -2.58364400 | 2.39524700  | -0.74647200 |
| C  | -3.57380800 | 2.14389300  | 0.22403400  |
| C  | -3.43135100 | 2.78613600  | 1.46849100  |
| C  | -2.36060600 | 3.63830000  | 1.73022500  |
| H  | -0.79810600 | 3.48842800  | -1.28172300 |
| H  | -2.70566400 | 1.99900500  | -1.75061700 |
| H  | -4.18153300 | 2.63589000  | 2.23926800  |
| H  | -2.29783800 | 4.13043600  | 2.69735500  |
| C  | -0.25565700 | 4.87765500  | 1.03001200  |
| H  | 0.71898700  | 4.46787400  | 0.75130500  |
| H  | -0.40328000 | 5.79136600  | 0.44227200  |
| H  | -0.22010300 | 5.16577600  | 2.08381800  |
| C  | -4.79887600 | 1.31044000  | -0.12232500 |
| H  | -4.55438500 | 0.73954500  | -1.02629600 |
| C  | -5.18448200 | 0.30162700  | 0.97235900  |
| H  | -5.48519300 | 0.79915300  | 1.90062400  |
| H  | -6.03257300 | -0.30357900 | 0.63898800  |
| H  | -4.36044500 | -0.38208700 | 1.19684300  |
| C  | -5.98740900 | 2.23702700  | -0.45949200 |
| H  | -5.73955100 | 2.92772900  | -1.27105400 |
| H  | -6.85442700 | 1.64533900  | -0.76967600 |
| H  | -6.28126000 | 2.83309500  | 0.41135900  |
| H  | -0.52269700 | 1.17789000  | 1.38230900  |
| H  | -1.25246700 | 0.69298700  | 1.28114500  |
| Cl | -0.27572100 | 0.90839500  | -2.63984400 |

### 3\_H2ax

Zero-point = -3351.538808

|    |             |             |             |
|----|-------------|-------------|-------------|
| Ru | -0.48779400 | 0.67659600  | 0.16037600  |
| P  | -0.95086700 | -1.41055500 | -0.63164800 |
| P  | 1.69547400  | 0.08281300  | 0.40401100  |
| C  | 2.41171700  | -0.73091400 | -1.09488800 |
| H  | 2.29749900  | 0.00716200  | -1.89325200 |
| H  | 3.47960200  | -0.86343100 | -0.89365700 |
| C  | 0.29604600  | -2.02136500 | -1.87493800 |
| C  | 1.82521300  | -2.09200500 | -1.56927500 |
| C  | 2.49054900  | -2.43164000 | -2.94366000 |
| H  | 2.23283700  | -3.46074200 | -3.21816800 |
| H  | 2.10258300  | -1.78076500 | -3.73923600 |
| P  | 4.33332900  | -2.28085300 | -3.03081800 |
| H  | 4.61414300  | -3.03264000 | -4.20009000 |
| H  | 4.50967600  | -0.95419200 | -3.50446000 |
| O  | 5.11135700  | -2.62967700 | -1.79619100 |
| H  | -0.05149500 | -2.99779800 | -2.22991700 |
| H  | 0.13585900  | -1.32223900 | -2.70217500 |

|   |             |             |             |
|---|-------------|-------------|-------------|
| C | 2.17068400  | -3.22800100 | -0.58449900 |
| H | 1.68076600  | -3.10839300 | 0.38183400  |
| H | 1.86127700  | -4.19248100 | -1.00125100 |
| H | 3.25015000  | -3.26921000 | -0.42464800 |
| C | 2.25639200  | -0.93262000 | 1.82379700  |
| C | 3.64043700  | -1.16055200 | 1.97724600  |
| C | 1.36544900  | -1.50858600 | 2.74140500  |
| C | 4.11053000  | -1.94961000 | 3.02484100  |
| H | 4.35021600  | -0.72022200 | 1.28611100  |
| C | 1.84399700  | -2.29701200 | 3.79207000  |
| H | 0.29846700  | -1.37228300 | 2.63324800  |
| C | 3.21347800  | -2.51895100 | 3.93445000  |
| H | 5.17499900  | -2.12104400 | 3.12965400  |
| H | 1.14347300  | -2.74032200 | 4.48991700  |
| H | 3.58318000  | -3.13259700 | 4.74706500  |
| C | 2.66809800  | 1.62881500  | 0.59839600  |
| C | 3.05569300  | 2.40186800  | -0.51292400 |
| C | 2.98665300  | 2.08419800  | 1.89388000  |
| C | 3.76497700  | 3.58991100  | -0.32850500 |
| H | 2.79412400  | 2.09721300  | -1.51791300 |
| C | 3.68793000  | 3.27870000  | 2.06846500  |
| H | 2.70908300  | 1.49588700  | 2.76058800  |
| C | 4.08148200  | 4.03086100  | 0.95927400  |
| H | 4.06868900  | 4.16690200  | -1.19392400 |
| H | 3.93598900  | 3.61309300  | 3.06899300  |
| H | 4.63415600  | 4.95249900  | 1.09681700  |
| C | -1.27022000 | -2.74670600 | 0.59385900  |
| C | -0.91746900 | -4.08305700 | 0.33714300  |
| C | -1.98488400 | -2.45799400 | 1.77300600  |
| C | -1.23585500 | -5.09188600 | 1.24959000  |
| H | -0.39689900 | -4.34950500 | -0.57183400 |
| C | -2.30639800 | -3.46782900 | 2.68058200  |
| H | -2.31757200 | -1.44652700 | 1.97755900  |
| C | -1.92391100 | -4.78719800 | 2.42461900  |
| H | -0.94848400 | -6.11465400 | 1.03718000  |
| H | -2.86167000 | -3.22611100 | 3.57950900  |
| H | -2.17028300 | -5.57163900 | 3.12987500  |
| C | -2.50846400 | -1.42460700 | -1.62509000 |
| C | -2.65541300 | -0.55461200 | -2.72541400 |
| C | -3.55788900 | -2.30991900 | -1.31162400 |
| C | -3.82303300 | -0.57642900 | -3.48924100 |
| H | -1.86900600 | 0.14696700  | -2.97514800 |
| C | -4.72279900 | -2.32219200 | -2.08188300 |
| H | -3.46811200 | -2.99192700 | -0.47718900 |
| C | -4.85948000 | -1.45752100 | -3.16922500 |
| H | -3.92060900 | 0.09531300  | -4.33426500 |
| H | -5.51936900 | -3.01335900 | -1.83269700 |
| H | -5.76440500 | -1.47183900 | -3.76486300 |



|    |             |             |             |
|----|-------------|-------------|-------------|
| C  | -1.29174600 | 3.29080300  | 2.00504700  |
| C  | -1.41485900 | 3.05055100  | 0.62108200  |
| C  | -2.51974400 | 2.33909900  | 0.10440200  |
| C  | -3.53967400 | 1.85504900  | 0.94949500  |
| C  | -3.40042000 | 2.09646100  | 2.32803700  |
| C  | -2.30574400 | 2.79229600  | 2.84006800  |
| H  | -0.71258800 | 3.50905300  | -0.06971000 |
| H  | -2.63273900 | 2.25314900  | -0.97299500 |
| H  | -4.16915100 | 1.75417000  | 3.01407100  |
| H  | -2.24557000 | 2.97248100  | 3.91040700  |
| C  | -0.15594200 | 4.11867600  | 2.55193600  |
| H  | -0.28655700 | 5.17261500  | 2.27968800  |
| H  | -0.11224900 | 4.06234800  | 3.64278500  |
| H  | 0.81018300  | 3.79798900  | 2.15211700  |
| C  | -4.78605300 | 1.21868700  | 0.35191400  |
| H  | -4.50449500 | 0.82102000  | -0.63032500 |
| C  | -5.35387200 | 0.05597900  | 1.18102400  |
| H  | -5.73048500 | 0.39022600  | 2.15357000  |
| H  | -6.19372600 | -0.40132700 | 0.65003400  |
| H  | -4.60659500 | -0.72501000 | 1.35139900  |
| C  | -5.86362100 | 2.30274400  | 0.12451400  |
| H  | -5.49051500 | 3.11270000  | -0.50943800 |
| H  | -6.74286600 | 1.86829600  | -0.36162000 |
| H  | -6.18551300 | 2.74101200  | 1.07541500  |
| H  | -0.49313300 | 0.47897600  | 1.83081100  |
| H  | -1.26068400 | 0.14745400  | 1.55408100  |
| Cl | 0.01230800  | 1.52470200  | -2.03637400 |
| C  | 1.10406000  | 4.82649500  | -2.40219900 |
| O  | 1.95414800  | 4.48337100  | -3.12762200 |
| O  | 0.26163100  | 5.18412700  | -1.67319000 |

Ts2\_H2ax

Zero-point = -3351.528256

|    |             |             |             |
|----|-------------|-------------|-------------|
| Ru | -0.18142900 | 0.95531000  | -0.06785700 |
| P  | -0.84744800 | -1.20391500 | -0.42018900 |
| P  | 1.97248200  | 0.25197800  | 0.22543100  |
| C  | 2.54782700  | -0.91642300 | -1.08767600 |
| H  | 2.41696200  | -0.36679000 | -2.02490500 |
| H  | 3.61971800  | -1.05840900 | -0.91636000 |
| C  | 0.34057100  | -2.19368300 | -1.47080900 |
| C  | 1.87106100  | -2.30735700 | -1.21374900 |
| C  | 2.44388900  | -2.99274100 | -2.49876000 |
| H  | 2.10851400  | -4.03558500 | -2.52403300 |
| H  | 2.05810700  | -2.51063000 | -3.40739400 |
| P  | 4.28713800  | -2.99709600 | -2.67864000 |
| H  | 4.46896300  | -4.02935500 | -3.63359800 |
| H  | 4.51918500  | -1.84154500 | -3.47013400 |
| O  | 5.09882900  | -3.08482700 | -1.41971000 |

|   |             |             |             |
|---|-------------|-------------|-------------|
| H | -0.09623500 | -3.19544500 | -1.55449100 |
| H | 0.18453000  | -1.71757200 | -2.44525000 |
| C | 2.20004700  | -3.21762600 | -0.01291000 |
| H | 1.76957500  | -2.85383600 | 0.91952800  |
| H | 1.81443500  | -4.22696100 | -0.19493300 |
| H | 3.28189200  | -3.29655800 | 0.11228900  |
| C | 2.49341700  | -0.50651500 | 1.81318200  |
| C | 3.85868600  | -0.82538100 | 1.97682700  |
| C | 1.59469500  | -0.81207000 | 2.84648000  |
| C | 4.30267600  | -1.43565000 | 3.14779500  |
| H | 4.57460700  | -0.59498100 | 1.19617900  |
| C | 2.04803200  | -1.42132500 | 4.02048000  |
| H | 0.53893100  | -0.60344800 | 2.74263100  |
| C | 3.39851800  | -1.73414100 | 4.17227900  |
| H | 5.35241000  | -1.67869500 | 3.25931600  |
| H | 1.34160000  | -1.65356500 | 4.80858600  |
| H | 3.74787300  | -2.20829000 | 5.08150200  |
| C | 3.12032500  | 1.67331800  | 0.05688600  |
| C | 3.51253500  | 2.14545900  | -1.21009200 |
| C | 3.57516600  | 2.34113600  | 1.20998800  |
| C | 4.35634000  | 3.25269300  | -1.31511100 |
| H | 3.14835600  | 1.67327900  | -2.11390400 |
| C | 4.41202400  | 3.45195600  | 1.09503200  |
| H | 3.29010400  | 1.98640600  | 2.19314800  |
| C | 4.80652300  | 3.90754900  | -0.16507500 |
| H | 4.65616400  | 3.60566400  | -2.29452800 |
| H | 4.76059600  | 3.95504500  | 1.98913500  |
| H | 5.46091700  | 4.76646900  | -0.25188100 |
| C | -1.27409400 | -2.15039300 | 1.09576400  |
| C | -0.89456500 | -3.48903800 | 1.28723300  |
| C | -2.09174500 | -1.53325000 | 2.06504100  |
| C | -1.28634900 | -4.18021800 | 2.43737000  |
| H | -0.29634800 | -4.00223200 | 0.54811800  |
| C | -2.48298300 | -2.22837700 | 3.20972800  |
| H | -2.45418900 | -0.52090000 | 1.91629000  |
| C | -2.07237700 | -3.55087200 | 3.40301700  |
| H | -0.97835000 | -5.21009900 | 2.57294600  |
| H | -3.11517100 | -1.74132100 | 3.94308300  |
| H | -2.37459900 | -4.08908200 | 4.29328800  |
| C | -2.35662200 | -1.44449100 | -1.46167500 |
| C | -2.51910200 | -0.73836600 | -2.66958300 |
| C | -3.29767500 | -2.43346300 | -1.11722600 |
| C | -3.60124300 | -1.01530200 | -3.50657900 |
| H | -1.80625900 | 0.02523200  | -2.95522700 |
| C | -4.37235300 | -2.70876500 | -1.96618800 |
| H | -3.19537300 | -2.99115300 | -0.19594100 |
| C | -4.52879300 | -2.00084700 | -3.15890000 |
| H | -3.71553200 | -0.46167800 | -4.43133500 |

|    |             |             |             |
|----|-------------|-------------|-------------|
| H  | -5.08570700 | -3.47660600 | -1.69085300 |
| H  | -5.36544700 | -2.21542000 | -3.81300400 |
| C  | -2.39287900 | 3.21781200  | 1.52395800  |
| C  | -2.32083300 | 2.82496100  | 0.16589600  |
| C  | -3.24154000 | 1.91213200  | -0.36949500 |
| C  | -4.26986600 | 1.35679800  | 0.41693400  |
| C  | -4.30989600 | 1.72582100  | 1.76531100  |
| C  | -3.38925500 | 2.63230700  | 2.30656900  |
| H  | -1.63684900 | 3.33418300  | -0.50598500 |
| H  | -3.19775900 | 1.67890000  | -1.42896000 |
| H  | -5.09061600 | 1.33262600  | 2.40919500  |
| H  | -3.48033700 | 2.91808300  | 3.35157500  |
| C  | -1.46225900 | 4.25475800  | 2.10613900  |
| H  | -1.35564500 | 5.11420500  | 1.43742900  |
| H  | -1.83671800 | 4.61874600  | 3.06616700  |
| H  | -0.45555400 | 3.85463700  | 2.27056400  |
| C  | -5.34399000 | 0.49174000  | -0.23022900 |
| H  | -4.87125300 | -0.04540300 | -1.05905800 |
| C  | -5.95334100 | -0.55578900 | 0.71391800  |
| H  | -6.54612700 | -0.09376300 | 1.51085900  |
| H  | -6.62679900 | -1.21273100 | 0.15542900  |
| H  | -5.18439100 | -1.18108900 | 1.17851200  |
| C  | -6.44989000 | 1.38789100  | -0.82991800 |
| H  | -6.04025400 | 2.10417300  | -1.54876000 |
| H  | -7.19824000 | 0.77893200  | -1.34774400 |
| H  | -6.96094900 | 1.95645600  | -0.04526900 |
| H  | -0.11740600 | 1.06092100  | 1.62255200  |
| H  | -0.89843900 | 0.73036000  | 1.44567400  |
| Cl | 0.17801200  | 1.40399800  | -2.37623000 |
| C  | 1.09847900  | 4.28897100  | -1.08278000 |
| O  | 1.43155400  | 4.88232100  | -2.02589000 |
| O  | 0.74789700  | 3.71667700  | -0.11718600 |

#### 4\_H2ax

Zero-point= -3351.530989

|    |             |             |             |
|----|-------------|-------------|-------------|
| Ru | 0.00648300  | 0.97576800  | -0.35977300 |
| P  | -0.64854100 | -1.20405300 | -0.54986600 |
| P  | 2.09527100  | 0.34656900  | 0.25951900  |
| C  | 2.78839800  | -0.92316500 | -0.89419800 |
| H  | 2.76381100  | -0.44756600 | -1.87885700 |
| H  | 3.83455100  | -1.05378000 | -0.59721400 |
| C  | 0.62381600  | -2.26538300 | -1.40766900 |
| C  | 2.12448100  | -2.32689500 | -0.98499000 |
| C  | 2.83370500  | -3.10077700 | -2.14618300 |
| H  | 2.50907500  | -4.14697500 | -2.12217700 |
| H  | 2.53900500  | -2.69707800 | -3.12428800 |
| P  | 4.68631300  | -3.09366400 | -2.13725400 |
| H  | 4.97319200  | -4.21441000 | -2.95684600 |

|   |             |             |             |
|---|-------------|-------------|-------------|
| H | 4.99231500  | -2.02088000 | -3.01538400 |
| O | 5.36455300  | -3.03879600 | -0.79950300 |
| H | 0.21456300  | -3.28109000 | -1.45236600 |
| H | 0.56141100  | -1.87011400 | -2.42794000 |
| C | 2.33526300  | -3.13375800 | 0.31269500  |
| H | 1.81077600  | -2.70186100 | 1.16463500  |
| H | 1.97475500  | -4.15932900 | 0.17696700  |
| H | 3.39951000  | -3.18731200 | 0.55140500  |
| C | 2.45220200  | -0.26224800 | 1.94909700  |
| C | 3.79695500  | -0.53128900 | 2.28324600  |
| C | 1.44964700  | -0.50603900 | 2.89980300  |
| C | 4.11935300  | -1.03270200 | 3.54241200  |
| H | 4.58973600  | -0.34775500 | 1.56687600  |
| C | 1.78171100  | -1.00633500 | 4.16217300  |
| H | 0.40764900  | -0.33752100 | 2.66316900  |
| C | 3.11285800  | -1.27022800 | 4.48415700  |
| H | 5.15424700  | -1.23907200 | 3.78691700  |
| H | 0.99683400  | -1.19404600 | 4.88506700  |
| H | 3.36817900  | -1.66038300 | 5.46196700  |
| C | 3.21350900  | 1.78804800  | 0.07680900  |
| C | 3.69971900  | 2.17686400  | -1.18658900 |
| C | 3.53089400  | 2.56871400  | 1.20578600  |
| C | 4.50135500  | 3.31308700  | -1.30951700 |
| H | 3.44189200  | 1.61507100  | -2.07562700 |
| C | 4.32631100  | 3.70749900  | 1.07101300  |
| H | 3.17238200  | 2.27926900  | 2.18636400  |
| C | 4.81517000  | 4.07953100  | -0.18377700 |
| H | 4.87657500  | 3.59994100  | -2.28457700 |
| H | 4.57005500  | 4.29734400  | 1.94659500  |
| H | 5.43690500  | 4.96086000  | -0.28454100 |
| C | -1.19181600 | -2.02140000 | 1.00315900  |
| C | -0.84847100 | -3.34394700 | 1.32956100  |
| C | -2.06349500 | -1.31721100 | 1.85862300  |
| C | -1.32953600 | -3.93353100 | 2.50220000  |
| H | -0.21042400 | -3.92340100 | 0.67751400  |
| C | -2.54239000 | -1.91073900 | 3.02705000  |
| H | -2.40227400 | -0.31913300 | 1.60240200  |
| C | -2.16814100 | -3.21707200 | 3.35654800  |
| H | -1.05034000 | -4.95262100 | 2.74192300  |
| H | -3.21596100 | -1.35648100 | 3.67006300  |
| H | -2.53991100 | -3.67648600 | 4.26450900  |
| C | -2.10718100 | -1.47772200 | -1.65125000 |
| C | -2.27421700 | -0.73965600 | -2.83895200 |
| C | -3.03612400 | -2.49019000 | -1.34015100 |
| C | -3.34715900 | -1.01057700 | -3.69103400 |
| H | -1.56947100 | 0.03723800  | -3.10445700 |
| C | -4.10085400 | -2.75792200 | -2.20243500 |
| H | -2.93337100 | -3.06741700 | -0.43053300 |

|    |             |             |             |
|----|-------------|-------------|-------------|
| C  | -4.26129700 | -2.01841100 | -3.37651100 |
| H  | -3.46315000 | -0.43439000 | -4.60167700 |
| H  | -4.80420900 | -3.54387900 | -1.95373100 |
| H  | -5.09069500 | -2.22774000 | -4.04151500 |
| C  | -3.02156800 | 3.11954400  | 1.41936500  |
| C  | -3.01546900 | 2.74374500  | 0.06306100  |
| C  | -3.87790200 | 1.75301900  | -0.41672800 |
| C  | -4.78551500 | 1.09913000  | 0.43176600  |
| C  | -4.77639600 | 1.46423600  | 1.78493100  |
| C  | -3.90852000 | 2.44769300  | 2.26864300  |
| H  | -2.36687200 | 3.26831300  | -0.63556300 |
| H  | -3.85941400 | 1.49427100  | -1.47222800 |
| H  | -5.46529800 | 0.98945500  | 2.47739500  |
| H  | -3.94360700 | 2.71705900  | 3.32157500  |
| C  | -2.15595700 | 4.24735700  | 1.93091200  |
| H  | -1.14216000 | 4.20333800  | 1.52158500  |
| H  | -2.57605500 | 5.22004900  | 1.64742300  |
| H  | -2.08380900 | 4.23139600  | 3.02194800  |
| C  | -5.77836500 | 0.09413500  | -0.13951600 |
| H  | -5.33489100 | -0.30502800 | -1.05985900 |
| C  | -6.05650100 | -1.09816100 | 0.78997900  |
| H  | -6.59025800 | -0.79329600 | 1.69672900  |
| H  | -6.68889900 | -1.83170000 | 0.27988300  |
| H  | -5.13194200 | -1.59969300 | 1.09213300  |
| C  | -7.09409400 | 0.80380300  | -0.52367600 |
| H  | -6.91588000 | 1.62085100  | -1.22943300 |
| H  | -7.79228200 | 0.09920500  | -0.98796600 |
| H  | -7.58170900 | 1.22759900  | 0.36117000  |
| H  | -0.12486500 | 1.12094100  | 1.33273400  |
| H  | -0.93737400 | 1.11933700  | 1.04973700  |
| Cl | 0.58906200  | 1.17828600  | -2.65523100 |
| C  | 0.84660400  | 4.02748100  | -1.21576700 |
| O  | 0.41904900  | 3.33533300  | -0.35921100 |
| O  | 1.24974900  | 4.74850000  | -2.02794300 |

## CO2

Zero-point = -188.569347

|   |            |            |             |
|---|------------|------------|-------------|
| C | 0.00000000 | 0.00000000 | 0.00000000  |
| O | 0.00000000 | 0.00000000 | 1.16914800  |
| O | 0.00000000 | 0.00000000 | -1.16914800 |

## 1\_CO2eq

|    |             |             |             |
|----|-------------|-------------|-------------|
| Ru | 0.11884100  | 1.02417000  | 0.30727900  |
| P  | -2.08320000 | 0.49565400  | -0.28757800 |
| P  | 0.74237800  | -1.22225300 | -0.08623000 |
| C  | -0.04620100 | -1.95451900 | -1.60056300 |
| H  | 0.34794000  | -1.35620600 | -2.42552300 |
| H  | 0.37458500  | -2.95806400 | -1.69180300 |

|   |             |             |             |
|---|-------------|-------------|-------------|
| C | -2.26231900 | -0.62976900 | -1.76161300 |
| C | -1.59662000 | -2.03724600 | -1.73282800 |
| C | -1.90627000 | -2.66610700 | -3.13158600 |
| H | -2.97688800 | -2.89228700 | -3.18792500 |
| H | -1.68415100 | -1.95768900 | -3.94118000 |
| P | -0.98455800 | -4.21856300 | -3.54924500 |
| H | -1.82110100 | -4.79313800 | -4.53916400 |
| H | 0.09237500  | -3.73807400 | -4.33852900 |
| O | -0.58705000 | -5.11105900 | -2.40700000 |
| H | -3.33928500 | -0.74512000 | -1.92669000 |
| H | -1.85627700 | -0.06328100 | -2.60209900 |
| C | -2.24679300 | -2.94085200 | -0.66484900 |
| H | -2.05441500 | -2.59533800 | 0.34965000  |
| H | -3.33325600 | -2.95399700 | -0.80245800 |
| H | -1.87634700 | -3.96318400 | -0.75440400 |
| C | 0.55493900  | -2.51644400 | 1.21422100  |
| C | 0.54026500  | -3.88651900 | 0.88113900  |
| C | 0.52894600  | -2.15633400 | 2.57043200  |
| C | 0.47904900  | -4.85321700 | 1.88622400  |
| H | 0.55907400  | -4.22040600 | -0.14916200 |
| C | 0.47560500  | -3.12628100 | 3.57413900  |
| H | 0.55510100  | -1.11092000 | 2.83935400  |
| C | 0.44658900  | -4.47886000 | 3.23190500  |
| H | 0.45782800  | -5.90111200 | 1.61199200  |
| H | 0.46107300  | -2.82709000 | 4.61638000  |
| H | 0.40249900  | -5.23586300 | 4.00565300  |
| C | 2.54686000  | -1.37401900 | -0.46737900 |
| C | 3.07503500  | -0.87128700 | -1.67364700 |
| C | 3.42121300  | -1.97622800 | 0.45707300  |
| C | 4.43911600  | -0.98376400 | -1.94705100 |
| H | 2.43031000  | -0.37793700 | -2.38897000 |
| C | 4.78648100  | -2.07708400 | 0.17849900  |
| H | 3.03801700  | -2.38778300 | 1.38198700  |
| C | 5.29885200  | -1.58841400 | -1.02537200 |
| H | 4.82792700  | -0.60645000 | -2.88604800 |
| H | 5.44360500  | -2.55788400 | 0.89403400  |
| H | 6.35530600  | -1.68326800 | -1.24586700 |
| C | -3.23718800 | -0.21288500 | 0.95465100  |
| C | -4.62004200 | -0.26001500 | 0.68593900  |
| C | -2.75666000 | -0.78338200 | 2.14192300  |
| C | -5.49275500 | -0.85995500 | 1.59331700  |
| H | -5.01442100 | 0.18230400  | -0.22205200 |
| C | -3.63411100 | -1.38617800 | 3.04753800  |
| H | -1.69406000 | -0.78651100 | 2.34076000  |
| C | -5.00212000 | -1.42311500 | 2.77565800  |
| H | -6.55435900 | -0.88920900 | 1.37815500  |
| H | -3.24593700 | -1.83573500 | 3.95424000  |
| H | -5.68349300 | -1.89116200 | 3.47590700  |

|    |             |            |             |
|----|-------------|------------|-------------|
| C  | -2.94915700 | 2.03654900 | -0.81268300 |
| C  | -2.76372400 | 2.57488200 | -2.09993000 |
| C  | -3.72045200 | 2.75986600 | 0.11976100  |
| C  | -3.33796000 | 3.80150600 | -2.44140500 |
| H  | -2.15274900 | 2.05960200 | -2.82860600 |
| C  | -4.28473700 | 3.98881300 | -0.22714500 |
| H  | -3.90352700 | 2.35142800 | 1.10702700  |
| C  | -4.09473700 | 4.51283200 | -1.50804700 |
| H  | -3.19202000 | 4.19947800 | -3.43890400 |
| H  | -4.88220800 | 4.52855300 | 0.49848000  |
| H  | -4.53852900 | 5.46357000 | -1.77799900 |
| Cl | 0.44914700  | 1.30782500 | -2.09329700 |
| C  | 0.16046500  | 1.65597900 | 2.60247800  |
| C  | 1.46701900  | 1.32541500 | 2.14995000  |
| C  | 2.08617100  | 2.01741100 | 1.07541500  |
| C  | 1.40512500  | 3.06299100 | 0.39922200  |
| C  | 0.04599600  | 3.30213700 | 0.74700100  |
| C  | -0.55988500 | 2.59817800 | 1.81498100  |
| H  | 2.03686200  | 0.56416700 | 2.67299700  |
| H  | 3.09479700  | 1.75019100 | 0.78505500  |
| H  | -0.54285100 | 4.01795200 | 0.18951400  |
| H  | -1.59025400 | 2.82233900 | 2.07058100  |
| C  | -0.40000600 | 1.17319100 | 3.91476200  |
| H  | 0.07134400  | 0.25202900 | 4.26134800  |
| H  | -0.20873400 | 1.93780900 | 4.67743300  |
| H  | -1.48003900 | 1.01917200 | 3.86523600  |
| C  | 2.13327800  | 3.86389700 | -0.66736200 |
| H  | 2.58688300  | 3.13086500 | -1.34501300 |
| C  | 1.22941400  | 4.78475500 | -1.49597800 |
| H  | 0.80064400  | 5.58672800 | -0.88379700 |
| H  | 1.82180300  | 5.26115900 | -2.28197300 |
| H  | 0.41883800  | 4.23183300 | -1.97645900 |
| C  | 3.27125300  | 4.67114300 | 0.00175300  |
| H  | 3.98123200  | 4.02747700 | 0.52785600  |
| H  | 3.82284100  | 5.22489400 | -0.76352000 |
| H  | 2.87084900  | 5.39812000 | 0.71658800  |
| C  | 6.48136600  | 1.15806500 | 0.53268900  |
| O  | 5.48525700  | 1.64783000 | 0.90818400  |
| O  | 7.47949400  | 0.67924800 | 0.16507300  |

Ts1\*\_CO2eq

Zero-point = -3350.347832

|    |             |             |             |
|----|-------------|-------------|-------------|
| Ru | -0.76691000 | 0.41353300  | 0.17446400  |
| P  | -0.47412200 | -1.72775400 | -0.48572000 |
| P  | 1.48909000  | 0.82805800  | 0.01770100  |
| C  | 2.35389700  | 0.00232400  | -1.40143400 |
| H  | 1.96183700  | 0.53308900  | -2.27500200 |
| H  | 3.40884400  | 0.27443100  | -1.30735400 |

|   |             |             |             |
|---|-------------|-------------|-------------|
| C | 0.75046800  | -1.94859600 | -1.86864000 |
| C | 2.23064900  | -1.52589200 | -1.65505600 |
| C | 2.95317900  | -1.83397800 | -3.00743500 |
| H | 3.02911700  | -2.92039100 | -3.12836700 |
| H | 2.37601700  | -1.45468200 | -3.86187800 |
| P | 4.65793600  | -1.13094100 | -3.18883000 |
| H | 5.19603000  | -1.94659700 | -4.21594100 |
| H | 4.42166500  | 0.08073400  | -3.88857800 |
| O | 5.47654700  | -0.99548400 | -1.93625000 |
| H | 0.71077300  | -3.01014900 | -2.13781900 |
| H | 0.33433500  | -1.38142900 | -2.70626700 |
| C | 2.91508500  | -2.37391200 | -0.56298800 |
| H | 2.52654100  | -2.16860100 | 0.43290700  |
| H | 2.75526500  | -3.43875000 | -0.76183800 |
| H | 3.98964500  | -2.18372400 | -0.55897300 |
| C | 2.45053200  | 0.44988900  | 1.53585700  |
| C | 3.81182100  | 0.09603300  | 1.50120800  |
| C | 1.81990600  | 0.61593200  | 2.78258900  |
| C | 4.51094800  | -0.11155900 | 2.69244200  |
| H | 4.33826800  | -0.02262500 | 0.56161500  |
| C | 2.52582600  | 0.41300700  | 3.97005200  |
| H | 0.77899900  | 0.92072400  | 2.81831200  |
| C | 3.87209400  | 0.04261200  | 3.92519700  |
| H | 5.55768100  | -0.38839300 | 2.65331800  |
| H | 2.03131800  | 0.55182000  | 4.92500000  |
| H | 4.42286500  | -0.11544300 | 4.84474800  |
| C | 1.95869100  | 2.59042400  | -0.28547800 |
| C | 1.75420200  | 3.18306100  | -1.54787400 |
| C | 2.52263600  | 3.36437100  | 0.74469800  |
| C | 2.11202600  | 4.51397900  | -1.76824200 |
| H | 1.29328600  | 2.62224800  | -2.35093300 |
| C | 2.87349000  | 4.69679000  | 0.51655900  |
| H | 2.69793700  | 2.93014000  | 1.72006800  |
| C | 2.67128000  | 5.27434600  | -0.73747900 |
| H | 1.94899300  | 4.95629900  | -2.74395000 |
| H | 3.31173600  | 5.27815400  | 1.31916200  |
| H | 2.94842300  | 6.30684000  | -0.91288700 |
| C | -0.00692000 | -2.99815600 | 0.75568500  |
| C | -0.06089300 | -4.36694800 | 0.42472000  |
| C | 0.48363000  | -2.62140700 | 2.01527800  |
| C | 0.35837500  | -5.32916500 | 1.34353600  |
| H | -0.43938100 | -4.68061000 | -0.54173700 |
| C | 0.90400900  | -3.58894800 | 2.93165900  |
| H | 0.57557200  | -1.57318200 | 2.26839700  |
| C | 0.83942600  | -4.94260200 | 2.59829500  |
| H | 0.31120700  | -6.37922300 | 1.08037100  |
| H | 1.29342500  | -3.28143100 | 3.89530700  |
| H | 1.16666500  | -5.69343700 | 3.30736900  |



|    |             |             |             |
|----|-------------|-------------|-------------|
| C  | -2.03035000 | -2.39581800 | -1.21444800 |
| C  | -2.43117600 | -2.00984700 | -2.50852600 |
| C  | -2.88516800 | -3.22267800 | -0.45824500 |
| C  | -3.64727500 | -2.45129900 | -3.03228800 |
| H  | -1.81694200 | -1.34163000 | -3.09792200 |
| C  | -4.10422700 | -3.65259300 | -0.98604200 |
| H  | -2.59291800 | -3.54938200 | 0.53234700  |
| C  | -4.48718800 | -3.27013700 | -2.27356000 |
| H  | -3.93914400 | -2.15045800 | -4.03163800 |
| H  | -4.74810200 | -4.29247900 | -0.39407400 |
| H  | -5.43101700 | -3.60936300 | -2.68319400 |
| Cl | -0.98317900 | 1.13139300  | -2.07000100 |
| C  | -2.08540400 | 0.40805900  | 2.83426600  |
| C  | -2.46199600 | 1.76952200  | 2.81070400  |
| C  | -3.26070600 | 2.28113800  | 1.79855100  |
| C  | -3.71140800 | 1.47757400  | 0.72813700  |
| C  | -3.29905600 | 0.13595100  | 0.70749600  |
| C  | -2.50179100 | -0.39727100 | 1.75316700  |
| H  | -2.15371900 | 2.41787500  | 3.62680300  |
| H  | -3.55108800 | 3.32704600  | 1.83311300  |
| H  | -3.66274100 | -0.53376800 | -0.06115300 |
| H  | -2.35006600 | -1.46997100 | 1.80717700  |
| C  | -1.46577600 | -0.18585000 | 4.07597300  |
| H  | -0.72975100 | 0.48438600  | 4.52879700  |
| H  | -2.24754900 | -0.35115800 | 4.82728000  |
| H  | -0.99362300 | -1.15031700 | 3.88239900  |
| C  | -4.66443200 | 2.07105000  | -0.30004000 |
| H  | -4.24468600 | 3.04430400  | -0.59276800 |
| C  | -4.83042900 | 1.23127800  | -1.57259900 |
| H  | -5.33255400 | 0.27957100  | -1.36581000 |
| H  | -5.45171500 | 1.77512900  | -2.28997400 |
| H  | -3.86876800 | 1.02040000  | -2.04673100 |
| C  | -6.03728400 | 2.34333500  | 0.35738800  |
| H  | -5.95374200 | 2.98801000  | 1.23718400  |
| H  | -6.70390200 | 2.83453700  | -0.35764600 |
| H  | -6.50831400 | 1.40521800  | 0.67006600  |
| C  | -1.14159200 | 4.07019400  | -0.57102500 |
| O  | -0.94860800 | 3.40169800  | 0.37524200  |
| O  | -1.36003700 | 4.75145800  | -1.48965800 |

2\_CO2eq

Zero-point = -3350.351502

|    |             |             |             |
|----|-------------|-------------|-------------|
| Ru | -0.64444900 | 0.49898000  | 0.03942300  |
| P  | -0.40850900 | -1.71726900 | -0.41677000 |
| P  | 1.59969000  | 0.83753500  | -0.07652600 |
| C  | 2.51810900  | -0.14951900 | -1.34587900 |
| H  | 2.19072700  | 0.29231200  | -2.29336300 |
| H  | 3.57398900  | 0.10704000  | -1.21925400 |

|   |             |             |             |
|---|-------------|-------------|-------------|
| C | 0.88791400  | -2.10693400 | -1.69406500 |
| C | 2.36419800  | -1.69459000 | -1.43285900 |
| C | 3.16277000  | -2.17274500 | -2.68939500 |
| H | 3.21087800  | -3.26736900 | -2.68136200 |
| H | 2.65407400  | -1.88007900 | -3.61810200 |
| P | 4.89822600  | -1.53735100 | -2.83153000 |
| H | 5.48547500  | -2.49338500 | -3.69788300 |
| H | 4.75228100  | -0.42477300 | -3.70016000 |
| O | 5.62634500  | -1.25316600 | -1.54807100 |
| H | 0.83814800  | -3.18818300 | -1.86422900 |
| H | 0.53849800  | -1.61548700 | -2.60711300 |
| C | 2.94939500  | -2.42529500 | -0.20667600 |
| H | 2.49715900  | -2.10164000 | 0.72942300  |
| H | 2.77507100  | -3.50250200 | -0.29609200 |
| H | 4.02567700  | -2.25576900 | -0.14585300 |
| C | 2.44706000  | 0.61116800  | 1.53392100  |
| C | 3.79666800  | 0.22868800  | 1.63834600  |
| C | 1.72666300  | 0.90977600  | 2.70655900  |
| C | 4.39794600  | 0.12582900  | 2.89497800  |
| H | 4.38683200  | 0.00642400  | 0.75686400  |
| C | 2.33496000  | 0.80816000  | 3.95908300  |
| H | 0.69458400  | 1.24161300  | 2.63578200  |
| C | 3.67103300  | 0.41040500  | 4.05365300  |
| H | 5.43694900  | -0.17311100 | 2.96481300  |
| H | 1.77285500  | 1.04687600  | 4.85487100  |
| H | 4.14623100  | 0.33173300  | 5.02417100  |
| C | 2.07969600  | 2.56082100  | -0.53667600 |
| C | 1.86480700  | 3.03796100  | -1.84606900 |
| C | 2.65270300  | 3.42347500  | 0.41616200  |
| C | 2.22111900  | 4.34341800  | -2.18748000 |
| H | 1.39941700  | 2.40524800  | -2.59131700 |
| C | 3.00234400  | 4.72948800  | 0.06563900  |
| H | 2.83700300  | 3.07714900  | 1.42462200  |
| C | 2.78938700  | 5.19194400  | -1.23384600 |
| H | 2.05139800  | 4.69662800  | -3.19779500 |
| H | 3.44843600  | 5.38019200  | 0.80846800  |
| H | 3.06493200  | 6.20446600  | -1.50304800 |
| C | -0.06945200 | -2.86909200 | 0.97395000  |
| C | -0.13647100 | -4.26223600 | 0.77501600  |
| C | 0.31102500  | -2.37905300 | 2.23332600  |
| C | 0.16822900  | -5.13693500 | 1.81772100  |
| H | -0.43993700 | -4.66156300 | -0.18641600 |
| C | 0.61545800  | -3.25923200 | 3.27506200  |
| H | 0.40560400  | -1.31234300 | 2.39529900  |
| C | 0.54314100  | -4.63752000 | 3.06900000  |
| H | 0.11242400  | -6.20678600 | 1.65522000  |
| H | 0.91865200  | -2.86646000 | 4.23871100  |
| H | 0.78005400  | -5.32079100 | 3.87562900  |

|    |             |             |             |
|----|-------------|-------------|-------------|
| C  | -1.94016500 | -2.41725100 | -1.16642000 |
| C  | -2.22747900 | -2.23303900 | -2.53205600 |
| C  | -2.88998500 | -3.07023700 | -0.35505500 |
| C  | -3.42559800 | -2.70475200 | -3.07136900 |
| H  | -1.53777800 | -1.70056900 | -3.17346100 |
| C  | -4.08987100 | -3.53085000 | -0.89971300 |
| H  | -2.68641700 | -3.23644700 | 0.69612900  |
| C  | -4.35910200 | -3.35231500 | -2.25888500 |
| H  | -3.62993100 | -2.56088900 | -4.12580900 |
| H  | -4.80767100 | -4.03614000 | -0.26417600 |
| H  | -5.28763800 | -3.71687000 | -2.68158400 |
| Cl | -0.84894600 | 0.96349800  | -2.27022800 |
| C  | -2.38171500 | 0.97439100  | 2.82504700  |
| C  | -3.02534100 | 2.21106100  | 2.64349900  |
| C  | -3.81268200 | 2.45817600  | 1.52458400  |
| C  | -3.99436700 | 1.49305700  | 0.51457900  |
| C  | -3.32864200 | 0.26776200  | 0.66798400  |
| C  | -2.53311300 | 0.00969800  | 1.80993500  |
| H  | -2.93035900 | 2.97717700  | 3.40906800  |
| H  | -4.31910000 | 3.41656600  | 1.43572300  |
| H  | -3.49002800 | -0.53133600 | -0.04511700 |
| H  | -2.16533400 | -0.99786000 | 1.98410200  |
| C  | -1.66914900 | 0.66551700  | 4.11986600  |
| H  | -1.03675800 | 1.49907000  | 4.44268700  |
| H  | -2.39782500 | 0.49248200  | 4.92063100  |
| H  | -1.05111000 | -0.23196700 | 4.04386900  |
| C  | -4.95875800 | 1.78027100  | -0.62963000 |
| H  | -4.78503900 | 2.82208300  | -0.93463700 |
| C  | -4.75952900 | 0.89141800  | -1.86406100 |
| H  | -5.01279200 | -0.15392100 | -1.65686700 |
| H  | -5.41880300 | 1.22948800  | -2.66910200 |
| H  | -3.72977600 | 0.92672700  | -2.22945700 |
| C  | -6.41522700 | 1.69055100  | -0.12035300 |
| H  | -6.59405700 | 2.35776600  | 0.72811200  |
| H  | -7.11246300 | 1.96413100  | -0.91822000 |
| H  | -6.65011200 | 0.66933900  | 0.19922300  |
| C  | -1.14858500 | 3.66180300  | -0.49670300 |
| O  | -0.93349900 | 2.83224500  | 0.31340100  |
| O  | -1.38085000 | 4.51016800  | -1.25229100 |

1\_CO2ax

Zero-point = -3350.374885

|    |             |             |             |
|----|-------------|-------------|-------------|
| Ru | 1.02449700  | -0.25321400 | -0.71792600 |
| P  | 0.44365000  | -1.31681100 | 1.28793700  |
| P  | -0.22128200 | 1.63983100  | -0.05876300 |
| C  | -0.01980400 | 2.07922400  | 1.73305900  |
| H  | 1.03842800  | 2.32799900  | 1.84039000  |
| H  | -0.59391900 | 2.99686500  | 1.87738000  |

|   |             |             |             |
|---|-------------|-------------|-------------|
| C | 0.47029000  | -0.22683300 | 2.79954900  |
| C | -0.41462300 | 1.05480200  | 2.83839800  |
| C | -0.10604900 | 1.72141000  | 4.21965300  |
| H | -0.53348400 | 1.10014100  | 5.01454900  |
| H | 0.97640400  | 1.77329800  | 4.39964600  |
| P | -0.73945800 | 3.44631100  | 4.45838600  |
| H | -0.77874000 | 3.54311300  | 5.87241100  |
| H | 0.39882000  | 4.23860100  | 4.15685800  |
| O | -1.99340200 | 3.82904400  | 3.72412200  |
| H | 0.20187300  | -0.87256000 | 3.64292600  |
| H | 1.51578700  | 0.06236700  | 2.92346000  |
| C | -1.91617100 | 0.70278800  | 2.81596000  |
| H | -2.22432200 | 0.24486100  | 1.87685900  |
| H | -2.14279400 | -0.01107600 | 3.61500500  |
| H | -2.51866000 | 1.59928000  | 2.97209200  |
| C | -2.03321900 | 1.76793800  | -0.37083000 |
| C | -2.80367200 | 2.75420300  | 0.27960200  |
| C | -2.65988000 | 0.94290600  | -1.31657000 |
| C | -4.16272300 | 2.88597200  | -0.00696400 |
| H | -2.36973600 | 3.41175200  | 1.02282500  |
| C | -4.02082500 | 1.07793500  | -1.60248500 |
| H | -2.08109400 | 0.18850800  | -1.82898600 |
| C | -4.77476700 | 2.05044800  | -0.94528700 |
| H | -4.74225000 | 3.64174600  | 0.50942800  |
| H | -4.48575500 | 0.41904400  | -2.32643900 |
| H | -5.83127200 | 2.15810500  | -1.15986900 |
| C | 0.39872800  | 3.13785300  | -0.94221300 |
| C | 1.63406700  | 3.72540400  | -0.60645000 |
| C | -0.33257900 | 3.66385900  | -2.02484500 |
| C | 2.11874200  | 4.81152200  | -1.33751300 |
| H | 2.22959200  | 3.32462800  | 0.20278400  |
| C | 0.16555600  | 4.74392200  | -2.75683200 |
| H | -1.29815500 | 3.24695400  | -2.28357900 |
| C | 1.39048800  | 5.32045200  | -2.41556900 |
| H | 3.06613100  | 5.26023900  | -1.06172100 |
| H | -0.41215900 | 5.14235800  | -3.58274600 |
| H | 1.77044300  | 6.16424500  | -2.97903900 |
| C | -1.13874900 | -2.23943100 | 1.43912600  |
| C | -1.35987400 | -3.08155000 | 2.54787300  |
| C | -2.16429200 | -2.07373100 | 0.49904600  |
| C | -2.58112700 | -3.73726600 | 2.69937200  |
| H | -0.57581800 | -3.23604100 | 3.28078000  |
| C | -3.38696500 | -2.73355400 | 0.65215600  |
| H | -2.01675300 | -1.40668300 | -0.33735000 |
| C | -3.59615700 | -3.56574400 | 1.75201200  |
| H | -2.74118800 | -4.38285800 | 3.55483600  |
| H | -4.16811100 | -2.58757900 | -0.08487800 |
| H | -4.54325100 | -4.07713100 | 1.87599000  |

|    |             |             |             |
|----|-------------|-------------|-------------|
| C  | 1.69608300  | -2.61645700 | 1.66620100  |
| C  | 2.93725900  | -2.29340500 | 2.24544800  |
| C  | 1.46059000  | -3.94791800 | 1.26658400  |
| C  | 3.91196100  | -3.27844800 | 2.42097100  |
| H  | 3.16034500  | -1.27576700 | 2.53564500  |
| C  | 2.44287400  | -4.92476000 | 1.43828900  |
| H  | 0.50088300  | -4.22768200 | 0.84722200  |
| C  | 3.67091600  | -4.59261600 | 2.01553300  |
| H  | 4.86018200  | -3.01543500 | 2.87525100  |
| H  | 2.24320300  | -5.94565800 | 1.13375200  |
| H  | 4.43000200  | -5.35305400 | 2.15433100  |
| Cl | 2.81246800  | 0.73748000  | 0.61339100  |
| C  | 0.09163700  | -1.50351100 | -2.51340200 |
| C  | 0.37889600  | -0.17235700 | -2.91793100 |
| C  | 1.69712900  | 0.35997900  | -2.86183200 |
| C  | 2.77252700  | -0.41713200 | -2.36705500 |
| C  | 2.46674100  | -1.69885600 | -1.81987500 |
| C  | 1.15419800  | -2.21742300 | -1.88639600 |
| H  | -0.41145100 | 0.43920900  | -3.34068600 |
| H  | 1.87307200  | 1.37542700  | -3.19737000 |
| H  | 3.23865000  | -2.28305600 | -1.33719900 |
| H  | 0.96121500  | -3.20526200 | -1.48130300 |
| C  | -1.20253900 | -2.19761700 | -2.84702200 |
| H  | -2.03468500 | -1.50596400 | -2.98644800 |
| H  | -1.07181400 | -2.73862500 | -3.79238000 |
| H  | -1.48180400 | -2.92745400 | -2.08451600 |
| C  | 4.18618300  | 0.14027300  | -2.41839200 |
| H  | 4.13734500  | 1.14156200  | -1.97377400 |
| C  | 5.22070400  | -0.67989700 | -1.63803600 |
| H  | 5.36225200  | -1.67396300 | -2.07798100 |
| H  | 6.18773100  | -0.17078400 | -1.67467500 |
| H  | 4.94048600  | -0.79071400 | -0.58812400 |
| C  | 4.61391500  | 0.28825200  | -3.89779200 |
| H  | 3.93140900  | 0.92645800  | -4.46633700 |
| H  | 5.61034900  | 0.73630900  | -3.94732300 |
| H  | 4.66007300  | -0.68721500 | -4.39376300 |
| C  | -5.66850800 | -2.81212900 | -3.37236700 |
| O  | -6.51157300 | -3.40673700 | -3.91448400 |
| O  | -4.81911000 | -2.21421300 | -2.82579700 |

Ts1\_CO2ax

Zero-point = -3350.331448

|    |             |             |             |
|----|-------------|-------------|-------------|
| Ru | -0.53968800 | 0.81805900  | -0.04409700 |
| P  | -1.18601600 | -1.38578100 | -0.32666900 |
| P  | 1.68263600  | 0.40904700  | -0.39937000 |
| C  | 2.03955400  | -1.01532800 | -1.52743800 |
| H  | 1.66943400  | -0.69222700 | -2.50490200 |
| H  | 3.12845900  | -1.06912300 | -1.59378800 |

|   |             |             |             |
|---|-------------|-------------|-------------|
| C | -0.09159900 | -2.43062600 | -1.41027500 |
| C | 1.45063400  | -2.42212800 | -1.21449700 |
| C | 2.00825300  | -3.41840200 | -2.28303300 |
| H | 1.71003700  | -4.43617500 | -2.00747400 |
| H | 1.57456200  | -3.21652300 | -3.27176600 |
| P | 3.84702900  | -3.42058900 | -2.51663200 |
| H | 4.07604300  | -4.71993400 | -3.03345700 |
| H | 4.01899600  | -2.62146600 | -3.67588500 |
| O | 4.67958900  | -3.01351000 | -1.33297000 |
| H | -0.47261000 | -3.45640300 | -1.36788800 |
| H | -0.31530000 | -2.06780100 | -2.41773700 |
| C | 1.84076400  | -2.95008400 | 0.17979900  |
| H | 1.45315200  | -2.32165500 | 0.98431700  |
| H | 1.43629400  | -3.95575100 | 0.32588100  |
| H | 2.92334600  | -3.01284200 | 0.28406300  |
| C | 2.82681300  | 0.22606700  | 1.03553500  |
| C | 3.98682700  | -0.57042500 | 0.97349100  |
| C | 2.62325200  | 1.03336600  | 2.17234000  |
| C | 4.88874200  | -0.58118100 | 2.04084800  |
| H | 4.21349900  | -1.18952500 | 0.11395400  |
| C | 3.53236100  | 1.02184800  | 3.23194000  |
| H | 1.75812900  | 1.67937000  | 2.22129000  |
| C | 4.66461900  | 0.20645800  | 3.17088600  |
| H | 5.77128900  | -1.20645100 | 1.97806000  |
| H | 3.36166000  | 1.65406800  | 4.09611600  |
| H | 5.37050900  | 0.19298800  | 3.99255600  |
| C | 2.48301200  | 1.83067900  | -1.28282300 |
| C | 2.33518600  | 2.01117900  | -2.67210000 |
| C | 3.24539000  | 2.77040800  | -0.56021900 |
| C | 2.92857200  | 3.09935200  | -3.31278400 |
| H | 1.73789900  | 1.32584400  | -3.25622200 |
| C | 3.82497800  | 3.86361600  | -1.20672000 |
| H | 3.41175600  | 2.63709900  | 0.50041400  |
| C | 3.66841500  | 4.03210400  | -2.58320300 |
| H | 2.80732000  | 3.21844800  | -4.38304200 |
| H | 4.41261200  | 4.57203700  | -0.63460700 |
| H | 4.12442700  | 4.87749500  | -3.08423400 |
| C | -1.53159600 | -2.33127600 | 1.21895500  |
| C | -1.26068100 | -3.70287700 | 1.35618000  |
| C | -2.24062300 | -1.68101000 | 2.25144700  |
| C | -1.65110800 | -4.39517000 | 2.50489000  |
| H | -0.75359100 | -4.24574000 | 0.57071400  |
| C | -2.63622800 | -2.37763000 | 3.39468800  |
| H | -2.48874900 | -0.63000600 | 2.15559600  |
| C | -2.33469700 | -3.73565600 | 3.52700600  |
| H | -1.42613500 | -5.45110200 | 2.59542800  |
| H | -3.18568700 | -1.86376600 | 4.17527400  |
| H | -2.63819600 | -4.27610800 | 4.41530400  |

|    |             |             |             |
|----|-------------|-------------|-------------|
| C  | -2.82027100 | -1.59311400 | -1.19491400 |
| C  | -2.92929200 | -1.42372800 | -2.59045400 |
| C  | -3.97670300 | -1.94923200 | -0.47336700 |
| C  | -4.15274500 | -1.60451900 | -3.23533500 |
| H  | -2.07248200 | -1.12505000 | -3.17692900 |
| C  | -5.19912400 | -2.12370700 | -1.12584400 |
| H  | -3.92736100 | -2.10839700 | 0.59442800  |
| C  | -5.29218100 | -1.95243200 | -2.50678800 |
| H  | -4.21302300 | -1.47123500 | -4.30916800 |
| H  | -6.07413800 | -2.40275500 | -0.55063300 |
| H  | -6.24034800 | -2.09287400 | -3.01174400 |
| Cl | -0.79618800 | 1.04465400  | -2.38918100 |
| C  | -0.68040800 | 3.24485400  | 2.19822900  |
| C  | -0.36019600 | 3.37632500  | 0.82718900  |
| C  | -1.33545400 | 3.15758000  | -0.16296100 |
| C  | -2.64391100 | 2.72089300  | 0.17125200  |
| C  | -2.90441600 | 2.48458400  | 1.53085300  |
| C  | -1.95349500 | 2.76774000  | 2.52176000  |
| H  | 0.60948300  | 3.76698600  | 0.53229800  |
| H  | -1.10832800 | 3.41242200  | -1.19181100 |
| H  | -3.88741900 | 2.13866500  | 1.83416500  |
| H  | -2.22265900 | 2.63200600  | 3.56596000  |
| C  | 0.29055100  | 3.65398100  | 3.27743700  |
| H  | 1.27250600  | 3.90303700  | 2.86770600  |
| H  | -0.07826100 | 4.54169900  | 3.80373500  |
| H  | 0.41464500  | 2.86641700  | 4.02782900  |
| C  | -3.72224100 | 2.67766700  | -0.90367100 |
| H  | -3.24037500 | 2.31730700  | -1.81971100 |
| C  | -4.89430000 | 1.73968500  | -0.58654700 |
| H  | -5.48102000 | 2.09159600  | 0.26981500  |
| H  | -5.57358300 | 1.70054600  | -1.44281400 |
| H  | -4.56107500 | 0.71774800  | -0.38709200 |
| C  | -4.23005600 | 4.11224500  | -1.17477300 |
| H  | -3.41471800 | 4.78535800  | -1.45688300 |
| H  | -4.95819600 | 4.10563000  | -1.99177000 |
| H  | -4.72067900 | 4.52868100  | -0.28804200 |
| C  | 0.35295200  | -0.65941100 | 3.33074000  |
| O  | 0.85359700  | -1.54473300 | 3.89391100  |
| O  | -0.15477000 | 0.24542200  | 2.77690900  |

## 2\_CO2ax

Zero-point = -3350.349118

|    |             |             |             |
|----|-------------|-------------|-------------|
| Ru | 1.02451600  | -0.25317700 | -0.71793600 |
| P  | 0.44371900  | -1.31663800 | 1.28801800  |
| P  | -0.22141100 | 1.63984800  | -0.05890600 |
| C  | -0.01998900 | 2.07937800  | 1.73289100  |
| H  | 1.03821500  | 2.32826300  | 1.84022400  |
| H  | -0.59420200 | 2.99697200  | 1.87711800  |

|   |             |             |             |
|---|-------------|-------------|-------------|
| C | 0.47029200  | -0.22654800 | 2.79954400  |
| C | -0.41475100 | 1.05499500  | 2.83828600  |
| C | -0.10631900 | 1.72168800  | 4.21954100  |
| H | -0.53377400 | 1.10042200  | 5.01442900  |
| H | 0.97611800  | 1.77363200  | 4.39961400  |
| P | -0.73980900 | 3.44657000  | 4.45819900  |
| H | -0.77901800 | 3.54346300  | 5.87221900  |
| H | 0.39840500  | 4.23891200  | 4.15656800  |
| O | -1.99381600 | 3.82920700  | 3.72399300  |
| H | 0.20195000  | -0.87222100 | 3.64298500  |
| H | 1.51576400  | 0.06276300  | 2.92341200  |
| C | -1.91625000 | 0.70277500  | 2.81573200  |
| H | -2.22423200 | 0.24477000  | 1.87661400  |
| H | -2.14285000 | -0.01109400 | 3.61478000  |
| H | -2.51887800 | 1.59918700  | 2.97177400  |
| C | -2.03336500 | 1.76775400  | -0.37096300 |
| C | -2.80392600 | 2.75399200  | 0.27938400  |
| C | -2.65993500 | 0.94258100  | -1.31663800 |
| C | -4.16298300 | 2.88561100  | -0.00722300 |
| H | -2.37006700 | 3.41163800  | 1.02256800  |
| C | -4.02088400 | 1.07746400  | -1.60260100 |
| H | -2.08105800 | 0.18819000  | -1.82895100 |
| C | -4.77492900 | 2.04996100  | -0.94549900 |
| H | -4.74259400 | 3.64137400  | 0.50909000  |
| H | -4.48574600 | 0.41848000  | -2.32651800 |
| H | -5.83143800 | 2.15750700  | -1.16011700 |
| C | 0.39842800  | 3.13790400  | -0.94241900 |
| C | 1.63371800  | 3.72558500  | -0.60669500 |
| C | -0.33297400 | 3.66384200  | -2.02501700 |
| C | 2.11824900  | 4.81176200  | -1.33776000 |
| H | 2.22931100  | 3.32485300  | 0.20250900  |
| C | 0.16501500  | 4.74397400  | -2.75700400 |
| H | -1.29851200 | 3.24683700  | -2.28372700 |
| C | 1.38989500  | 5.32063400  | -2.41577700 |
| H | 3.06560300  | 5.26057400  | -1.06200200 |
| H | -0.41277400 | 5.14235700  | -3.58289200 |
| H | 1.76973200  | 6.16448100  | -2.97924600 |
| C | -1.13858800 | -2.23941000 | 1.43926800  |
| C | -1.35963600 | -3.08134900 | 2.54817000  |
| C | -2.16408500 | -2.07411100 | 0.49907100  |
| C | -2.58077600 | -3.73726400 | 2.69971600  |
| H | -0.57560400 | -3.23554700 | 3.28116500  |
| C | -3.38664400 | -2.73413700 | 0.65222700  |
| H | -2.01664800 | -1.40720000 | -0.33745300 |
| C | -3.59576500 | -3.56613400 | 1.75224100  |
| H | -2.74077800 | -4.38270600 | 3.55530400  |
| H | -4.16775800 | -2.58846500 | -0.08490300 |
| H | -4.54277100 | -4.07767400 | 1.87625100  |



|    |             |             |             |
|----|-------------|-------------|-------------|
| C  | 1.69625900  | -2.61616000 | 1.66637400  |
| C  | 2.93746900  | -2.29292000 | 2.24545200  |
| C  | 1.46081800  | -3.94770000 | 1.26700800  |
| C  | 3.91225200  | -3.27786500 | 2.42105500  |
| H  | 3.16051100  | -1.27521500 | 2.53545200  |
| C  | 2.44318600  | -4.92444500 | 1.43879000  |
| H  | 0.50108800  | -4.22760100 | 0.84779000  |
| C  | 3.67125800  | -4.59212000 | 2.01586400  |
| H  | 4.86049700  | -3.01471100 | 2.87520500  |
| H  | 2.24355400  | -5.94540800 | 1.13444800  |
| H  | 4.43040800  | -5.35248300 | 2.15472300  |
| Cl | 2.81236500  | 0.73785100  | 0.61332200  |
| C  | 0.09171500  | -1.50359600 | -2.51335200 |
| C  | 0.37897000  | -0.17245200 | -2.91793800 |
| C  | 1.69718600  | 0.35991100  | -2.86180700 |
| C  | 2.77258600  | -0.41716900 | -2.36696800 |
| C  | 2.46680300  | -1.69886700 | -1.81973600 |
| C  | 1.15426100  | -2.21744900 | -1.88625900 |
| H  | -0.41137200 | 0.43908200  | -3.34074600 |
| H  | 1.87312600  | 1.37535600  | -3.19735600 |
| H  | 3.23871300  | -2.28304200 | -1.33703700 |
| H  | 0.96127800  | -3.20526900 | -1.48111700 |
| C  | -1.20239500 | -2.19777100 | -2.84708800 |
| H  | -2.03465700 | -1.50620600 | -2.98625000 |
| H  | -1.07164700 | -2.73847300 | -3.79261900 |
| H  | -1.48150300 | -2.92787500 | -2.08478000 |
| C  | 4.18623000  | 0.14027100  | -2.41826600 |
| H  | 4.13735400  | 1.14154900  | -1.97362800 |
| C  | 5.22075700  | -0.67988200 | -1.63789900 |
| H  | 5.36234000  | -1.67394100 | -2.07785100 |
| H  | 6.18777200  | -0.17074500 | -1.67450800 |
| H  | 4.94052500  | -0.79072200 | -0.58799200 |
| C  | 4.61399800  | 0.28829300  | -3.89764800 |
| H  | 3.93148600  | 0.92648500  | -4.46620200 |
| H  | 5.61041700  | 0.73639000  | -3.94714100 |
| H  | 4.66020900  | -0.68716300 | -4.39363800 |
| C  | -5.66790300 | -2.81302300 | -3.37220600 |
| O  | -6.51077500 | -3.40733600 | -3.91494400 |
| O  | -4.81870900 | -2.21539200 | -2.82500500 |

**S8. Cartesian coordinates (Å) and zero-point corrected energies, (Hartrees) of optimized structures of stationary points for the formation of the active specie Ru<sub>2</sub><sub>ace</sub> H in presence of acetate anion.**

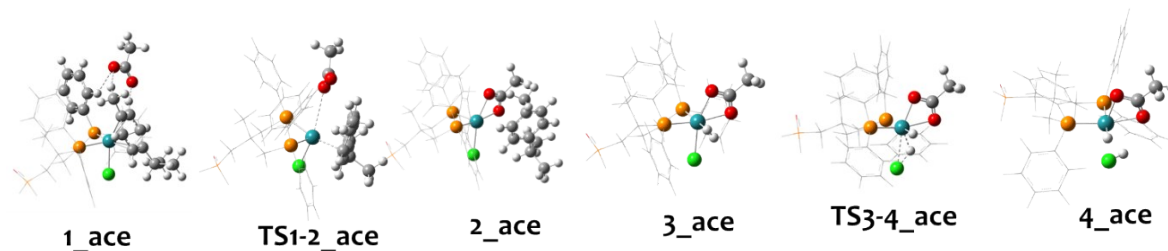

Acetate

Zero-point = -228.454177

|   |             |             |             |
|---|-------------|-------------|-------------|
| C | 0.22017600  | -0.00001100 | -0.01332900 |
| O | 0.75203900  | -1.13901600 | 0.00310800  |
| O | 0.75268900  | 1.13868300  | 0.00311000  |
| C | -1.35462900 | 0.00032100  | -0.00452200 |
| H | -1.71519100 | -0.00187000 | 1.03487800  |
| H | -1.75785400 | 0.89943800  | -0.48695600 |
| H | -1.75806300 | -0.89676800 | -0.49056400 |

1\_ace

Zero-point = -3390.403432

|    |             |             |             |
|----|-------------|-------------|-------------|
| Ru | -0.23817400 | 1.14912500  | 0.23819100  |
| P  | -0.86735800 | -0.65593200 | -1.16311500 |
| P  | 1.88227300  | 0.22026400  | 0.41119000  |
| C  | 2.61306300  | -0.35183500 | -1.20268000 |
| H  | 2.71188100  | 0.55538700  | -1.80372300 |
| H  | 3.61721000  | -0.71432600 | -0.95976100 |
| C  | 0.43417300  | -1.00589700 | -2.45300400 |
| C  | 1.87315600  | -1.43854800 | -2.03578200 |
| C  | 2.64010400  | -1.58462500 | -3.39064500 |
| H  | 2.25265600  | -2.45883700 | -3.92693700 |
| H  | 2.46425300  | -0.71001400 | -4.03400100 |
| P  | 4.47123300  | -1.75970600 | -3.33125300 |
| H  | 4.74421800  | -2.02499200 | -4.70124700 |
| H  | 4.90862500  | -0.41151500 | -3.23167300 |
| O  | 5.07886200  | -2.70581900 | -2.33893600 |
| H  | 0.02801000  | -1.75629800 | -3.13756000 |
| H  | 0.51290600  | -0.07003500 | -3.00863200 |
| C  | 1.89147500  | -2.81023000 | -1.33134600 |
| H  | 1.34558800  | -2.79924400 | -0.38860200 |
| H  | 1.42066100  | -3.56666500 | -1.96706300 |
| H  | 2.92024700  | -3.12164000 | -1.13483300 |
| C  | 2.24171500  | -1.17918700 | 1.54752400  |
| C  | 3.56032600  | -1.66088600 | 1.68574300  |
| C  | 1.20882100  | -1.81997900 | 2.24277300  |
| C  | 3.82439600  | -2.75978100 | 2.50083600  |
| H  | 4.37831300  | -1.18000900 | 1.16125800  |
| C  | 1.47704800  | -2.92227700 | 3.06035400  |
| H  | 0.19368000  | -1.47027800 | 2.13391200  |

|   |             |             |             |
|---|-------------|-------------|-------------|
| C | 2.78303500  | -3.39282900 | 3.18892300  |
| H | 4.83992500  | -3.12661200 | 2.59328500  |
| H | 0.66114300  | -3.40838500 | 3.58226100  |
| H | 2.99276900  | -4.25047500 | 3.81735200  |
| C | 3.09489700  | 1.50181900  | 0.96472000  |
| C | 3.45079100  | 2.55942000  | 0.10523500  |
| C | 3.58948600  | 1.50442200  | 2.28264600  |
| C | 4.29077400  | 3.58076200  | 0.55311000  |
| H | 3.04249500  | 2.60581200  | -0.89681900 |
| C | 4.42280400  | 2.53468600  | 2.72548400  |
| H | 3.33585700  | 0.69612200  | 2.95768800  |
| C | 4.77837300  | 3.57259900  | 1.86233000  |
| H | 4.55946700  | 4.38545500  | -0.12205100 |
| H | 4.79776700  | 2.51940500  | 3.74254600  |
| H | 5.42901600  | 4.36811200  | 2.20636200  |
| C | -1.38707400 | -2.32220700 | -0.57669400 |
| C | -1.48908100 | -3.38155100 | -1.50512400 |
| C | -1.77621100 | -2.55036100 | 0.74735900  |
| C | -1.91396500 | -4.64250100 | -1.09548500 |
| H | -1.25670800 | -3.22387300 | -2.55127100 |
| C | -2.21051300 | -3.81780200 | 1.15430300  |
| H | -1.81897200 | -1.75788900 | 1.48117300  |
| C | -2.26508100 | -4.86679400 | 0.24096700  |
| H | -1.98266200 | -5.44663400 | -1.81949800 |
| H | -2.53451400 | -3.93297600 | 2.18104100  |
| H | -2.60094500 | -5.84846600 | 0.55511400  |
| C | -2.34326200 | -0.16901000 | -2.15400500 |
| C | -2.24781000 | 0.42824300  | -3.42208500 |
| C | -3.61314200 | -0.33893500 | -1.56213200 |
| C | -3.40264500 | 0.83823800  | -4.09500700 |
| H | -1.28320000 | 0.59366700  | -3.88410600 |
| C | -4.75739100 | 0.08443500  | -2.24076400 |
| H | -3.72372600 | -0.77522000 | -0.57089000 |
| C | -4.65711800 | 0.66826100  | -3.50699300 |
| H | -3.31720700 | 1.29239300  | -5.07596200 |
| H | -5.72563200 | -0.04881200 | -1.77208000 |
| H | -5.55039800 | 0.98919000  | -4.03072600 |
| C | -0.99174400 | 1.21107300  | 2.50221100  |
| C | -0.04925100 | 2.25557400  | 2.23478900  |
| C | -0.27887800 | 3.20725400  | 1.22541000  |
| C | -1.48610800 | 3.18047800  | 0.44347900  |
| C | -2.35356900 | 2.09360400  | 0.63224300  |
| C | -2.10090200 | 1.09987400  | 1.62821500  |
| H | 0.86528500  | 2.31452900  | 2.81685400  |
| H | 0.46635700  | 3.97017100  | 1.02902000  |
| H | -3.22833500 | 1.97371100  | 0.00576200  |
| H | -2.84529900 | 0.29089400  | 1.73692100  |
| C | -0.88246000 | 0.35245200  | 3.73304600  |

|    |             |             |             |
|----|-------------|-------------|-------------|
| H  | 0.14977400  | 0.06426300  | 3.94857200  |
| H  | -1.24003300 | 0.94772400  | 4.58401400  |
| H  | -1.53625700 | -0.52501200 | 3.65864900  |
| C  | -1.75377000 | 4.30817600  | -0.53558400 |
| H  | -0.79849900 | 4.52256300  | -1.02826400 |
| C  | -2.77970300 | 3.97041800  | -1.62314600 |
| H  | -3.78167300 | 3.82149000  | -1.20550000 |
| H  | -2.84459700 | 4.80102400  | -2.33291900 |
| H  | -2.49791600 | 3.07209400  | -2.17684000 |
| C  | -2.17903300 | 5.56338700  | 0.26003600  |
| H  | -1.43237800 | 5.84799900  | 1.00837800  |
| H  | -2.31085100 | 6.40912600  | -0.42217800 |
| H  | -3.12965800 | 5.39610300  | 0.77810300  |
| Cl | 0.55774600  | 2.21966800  | -1.83815100 |
| C  | -4.25306400 | -1.55906800 | 2.61727500  |
| O  | -3.21708900 | -1.77964600 | 3.30419500  |
| O  | -4.34286800 | -0.78138700 | 1.61866500  |
| C  | -5.52458500 | -2.34174900 | 2.98705500  |
| H  | -5.47079200 | -2.72337300 | 4.00951000  |
| H  | -6.41314700 | -1.71645500 | 2.86179100  |
| H  | -5.62864900 | -3.19437600 | 2.30442800  |

Ts1\_ace

Zero-point = -3390.382638

|    |             |             |             |
|----|-------------|-------------|-------------|
| Ru | 0.52149800  | -0.99079400 | -0.03475700 |
| P  | 0.91568800  | 1.20905200  | -0.71705500 |
| P  | -1.69678300 | -0.57287300 | 0.01248700  |
| C  | -2.35014200 | 0.34412600  | -1.46978900 |
| H  | -2.19027400 | -0.35563200 | -2.29545300 |
| H  | -3.43069300 | 0.43334400  | -1.31778800 |
| C  | -0.23575900 | 1.69539000  | -2.10914300 |
| C  | -1.77351000 | 1.73412700  | -1.85999500 |
| C  | -2.38863900 | 2.12254000  | -3.24422300 |
| H  | -2.15276600 | 3.17196400  | -3.45625200 |
| H  | -1.94332600 | 1.52372300  | -4.05213200 |
| P  | -4.20565800 | 1.92010400  | -3.45763600 |
| H  | -4.38824100 | 2.54096600  | -4.72376500 |
| H  | -4.32592300 | 0.55060400  | -3.81566400 |
| O  | -5.12107600 | 2.37581000  | -2.35937800 |
| H  | 0.08591100  | 2.68227700  | -2.45815400 |
| H  | -0.04453700 | 0.97496800  | -2.90626400 |
| C  | -2.18073300 | 2.82435400  | -0.84820900 |
| H  | -1.82610300 | 2.61017400  | 0.15837300  |
| H  | -1.75340400 | 3.78874400  | -1.14203500 |
| H  | -3.26858100 | 2.92412200  | -0.81830400 |
| C  | -2.40105900 | 0.26277100  | 1.48611300  |
| C  | -3.72925900 | 0.73866100  | 1.49619200  |
| C  | -1.61932000 | 0.39327300  | 2.64331300  |

|   |             |             |             |
|---|-------------|-------------|-------------|
| C | -4.24931500 | 1.33919400  | 2.64173900  |
| H | -4.35821700 | 0.64884900  | 0.61769600  |
| C | -2.14668400 | 1.00064700  | 3.78842700  |
| H | -0.58298400 | 0.06843000  | 2.68235200  |
| C | -3.45869300 | 1.47164100  | 3.78965500  |
| H | -5.26801600 | 1.70954300  | 2.63586900  |
| H | -1.50434700 | 1.10832700  | 4.65450300  |
| H | -3.86746400 | 1.94615200  | 4.67462100  |
| C | -2.70256100 | -2.12610900 | -0.08160900 |
| C | -2.60397500 | -2.95491200 | -1.21745100 |
| C | -3.51648100 | -2.53732200 | 0.98907100  |
| C | -3.30958600 | -4.15750000 | -1.27741600 |
| H | -1.95098700 | -2.67581700 | -2.03640100 |
| C | -4.21540700 | -3.74590800 | 0.92316600  |
| H | -3.61086600 | -1.91244600 | 1.86792600  |
| C | -4.11568300 | -4.55724600 | -0.20792100 |
| H | -3.22556300 | -4.78350000 | -2.15882200 |
| H | -4.83966500 | -4.04798000 | 1.75639700  |
| H | -4.66008600 | -5.49316500 | -0.25640300 |
| C | 0.92364900  | 2.78394000  | 0.25280900  |
| C | 1.42551400  | 3.93817000  | -0.37936100 |
| C | 0.37854400  | 2.89805900  | 1.53632500  |
| C | 1.36802300  | 5.17741200  | 0.25955100  |
| H | 1.87983900  | 3.86723700  | -1.36147000 |
| C | 0.31915300  | 4.14125100  | 2.17136600  |
| H | 0.02467500  | 2.02439900  | 2.05858200  |
| C | 0.80926300  | 5.28308200  | 1.53556000  |
| H | 1.76488000  | 6.05586200  | -0.23676600 |
| H | -0.10443100 | 4.20645500  | 3.16686800  |
| H | 0.76481600  | 6.24575800  | 2.03181400  |
| C | 2.57839500  | 1.27429700  | -1.51122600 |
| C | 2.77317800  | 1.14824200  | -2.89705900 |
| C | 3.69950600  | 1.41087100  | -0.66527100 |
| C | 4.06433500  | 1.17606700  | -3.43185700 |
| H | 1.93194900  | 1.01601300  | -3.56450300 |
| C | 4.98353900  | 1.43467700  | -1.21196600 |
| H | 3.54763900  | 1.46757900  | 0.41058200  |
| C | 5.17018000  | 1.32274300  | -2.59310100 |
| H | 4.20172500  | 1.08147900  | -4.50328600 |
| H | 5.83997800  | 1.54113700  | -0.55512300 |
| H | 6.17012300  | 1.34454700  | -3.01160400 |
| C | 0.79579400  | -2.53337800 | 2.34893000  |
| C | 0.26556700  | -3.14220000 | 1.17810900  |
| C | 1.06163600  | -3.32643800 | 0.03893800  |
| C | 2.41084400  | -2.86151400 | -0.01185500 |
| C | 2.86785200  | -2.14196100 | 1.09570500  |
| C | 2.08251900  | -2.00138100 | 2.26099700  |
| H | -0.74349800 | -3.53974000 | 1.18900800  |

|    |             |             |             |
|----|-------------|-------------|-------------|
| H  | 0.65171400  | -3.85749500 | -0.81225300 |
| H  | 3.84944400  | -1.68501200 | 1.08372000  |
| H  | 2.47859700  | -1.45570500 | 3.10477300  |
| C  | 0.02439200  | -2.48636900 | 3.64068400  |
| H  | -1.05483600 | -2.51711300 | 3.46752600  |
| H  | 0.28329900  | -3.35476000 | 4.26018200  |
| H  | 0.27838800  | -1.57625500 | 4.19005200  |
| C  | 3.27291900  | -3.20781500 | -1.21594200 |
| H  | 2.65707200  | -3.01557100 | -2.10284500 |
| C  | 4.55138500  | -2.37028700 | -1.33696000 |
| H  | 5.24954100  | -2.57861200 | -0.51738300 |
| H  | 5.06610600  | -2.61959200 | -2.27015700 |
| H  | 4.34315600  | -1.29815400 | -1.34617700 |
| C  | 3.61004100  | -4.71528200 | -1.19354100 |
| H  | 2.70891700  | -5.33564200 | -1.15727000 |
| H  | 4.17043300  | -4.99057500 | -2.09316100 |
| H  | 4.22607200  | -4.96545100 | -0.32225400 |
| Cl | 0.37434800  | -1.52693600 | -2.38880100 |
| C  | 2.16800200  | 1.04896900  | 3.24139000  |
| O  | 1.19032200  | 0.60109400  | 3.89658100  |
| O  | 2.43886600  | 0.78194900  | 2.02758500  |
| C  | 3.11324700  | 2.03307500  | 3.94837800  |
| H  | 2.98823400  | 1.99262600  | 5.03296800  |
| H  | 4.15508800  | 1.83128700  | 3.68142000  |
| H  | 2.87976200  | 3.04769900  | 3.60497400  |

2\_ace

Zero-point = -3390.45561

|    |             |             |             |
|----|-------------|-------------|-------------|
| Ru | 0.65955300  | 0.43107500  | -0.11447400 |
| P  | -1.13377500 | 1.75189900  | -0.18024500 |
| P  | -0.63392100 | -1.44408400 | -0.19626300 |
| C  | -2.06230700 | -1.34986700 | -1.39076200 |
| H  | -1.55551700 | -1.31635500 | -2.36151300 |
| H  | -2.59594800 | -2.30392300 | -1.33684600 |
| C  | -2.39695400 | 1.21584500  | -1.44354400 |
| C  | -3.07997500 | -0.17744100 | -1.31573700 |
| C  | -4.01003900 | -0.28293000 | -2.56733700 |
| H  | -4.84098300 | 0.42440800  | -2.45933200 |
| H  | -3.46745900 | -0.00386300 | -3.48224400 |
| P  | -4.74507900 | -1.93053700 | -2.93338700 |
| H  | -5.64218100 | -1.58811500 | -3.98199600 |
| H  | -3.71616400 | -2.57950100 | -3.66515900 |
| O  | -5.32733300 | -2.72704600 | -1.80170600 |
| H  | -3.17231400 | 1.98925900  | -1.47963800 |
| H  | -1.84913500 | 1.25703100  | -2.38990300 |
| C  | -3.97201100 | -0.26514000 | -0.06029000 |
| H  | -3.39057800 | -0.25065600 | 0.86117100  |
| H  | -4.65965000 | 0.58624100  | -0.02508600 |

|   |             |             |             |
|---|-------------|-------------|-------------|
| H | -4.56701800 | -1.18094200 | -0.08222700 |
| C | -1.32307200 | -2.07846400 | 1.39342000  |
| C | -2.47950400 | -2.87740400 | 1.46319300  |
| C | -0.60007800 | -1.82384900 | 2.57388800  |
| C | -2.91006000 | -3.39177100 | 2.68774200  |
| H | -3.05314100 | -3.10252000 | 0.57206600  |
| C | -1.03145500 | -2.34959900 | 3.79485900  |
| H | 0.29139600  | -1.20862900 | 2.53389300  |
| C | -2.18757900 | -3.13015700 | 3.85474500  |
| H | -3.80764800 | -3.99815500 | 2.72697600  |
| H | -0.46364000 | -2.14640800 | 4.69635100  |
| H | -2.52384300 | -3.53420000 | 4.80280900  |
| C | 0.19046300  | -2.98161000 | -0.84205400 |
| C | 0.73966300  | -2.98427200 | -2.14008600 |
| C | 0.30121100  | -4.14625100 | -0.06034300 |
| C | 1.37122300  | -4.12461500 | -2.63915100 |
| H | 0.70041700  | -2.08506300 | -2.74403400 |
| C | 0.94066100  | -5.28133400 | -0.56524300 |
| H | -0.11450700 | -4.17069000 | 0.93825200  |
| C | 1.47476600  | -5.27545300 | -1.85441200 |
| H | 1.78949900  | -4.10806100 | -3.63948300 |
| H | 1.01696400  | -6.16983800 | 0.05139300  |
| H | 1.97021200  | -6.15773600 | -2.24300400 |
| C | -2.13345800 | 2.08380700  | 1.33428100  |
| C | -3.28424300 | 2.89516400  | 1.25763600  |
| C | -1.78069100 | 1.52021700  | 2.56911900  |
| C | -4.07009300 | 3.11629800  | 2.38712100  |
| H | -3.55656900 | 3.36585000  | 0.31942900  |
| C | -2.57499400 | 1.74358700  | 3.69911000  |
| H | -0.88350000 | 0.92202300  | 2.64448900  |
| C | -3.71985900 | 2.53432800  | 3.61026600  |
| H | -4.95317400 | 3.74104900  | 2.31533700  |
| H | -2.29500600 | 1.29367100  | 4.64485600  |
| H | -4.33566400 | 2.70284800  | 4.48621400  |
| C | -0.71680200 | 3.46024200  | -0.74681900 |
| C | -0.28757600 | 3.67592800  | -2.06988000 |
| C | -0.74673000 | 4.54878200  | 0.14322400  |
| C | 0.07398600  | 4.95508600  | -2.49366200 |
| H | -0.18847900 | 2.84023600  | -2.75144800 |
| C | -0.37512100 | 5.82438700  | -0.28621300 |
| H | -1.06296600 | 4.40306300  | 1.16829100  |
| C | 0.02967400  | 6.03225300  | -1.60561300 |
| H | 0.40471000  | 5.10498700  | -3.51519500 |
| H | -0.40242100 | 6.65321500  | 0.41221800  |
| H | 0.31737400  | 7.02343200  | -1.93701600 |
| C | 4.03681100  | -1.79507600 | 1.87328300  |
| C | 3.24803800  | -1.90358200 | 0.71938400  |
| C | 3.47844000  | -1.08652500 | -0.39113700 |

|    |            |             |             |
|----|------------|-------------|-------------|
| C  | 4.51422000 | -0.13426900 | -0.39786300 |
| C  | 5.30380700 | -0.03599500 | 0.75362900  |
| C  | 5.06670000 | -0.84830600 | 1.86727000  |
| H  | 2.45251700 | -2.64157800 | 0.67732300  |
| H  | 2.87149500 | -1.21436600 | -1.28345700 |
| H  | 6.12005300 | 0.68034100  | 0.79001900  |
| H  | 5.70216100 | -0.74665500 | 2.74496900  |
| C  | 3.79527000 | -2.69309400 | 3.06431700  |
| H  | 4.17798200 | -3.70596400 | 2.88583500  |
| H  | 4.28996300 | -2.31002800 | 3.96192700  |
| H  | 2.72596600 | -2.78773700 | 3.28135900  |
| C  | 4.77910900 | 0.69853600  | -1.64525900 |
| H  | 3.86674000 | 0.65365200  | -2.25163500 |
| C  | 5.05073300 | 2.18108800  | -1.34018400 |
| H  | 5.98361200 | 2.31864100  | -0.78019200 |
| H  | 5.15007800 | 2.74353300  | -2.27513700 |
| H  | 4.22923800 | 2.61365600  | -0.76357100 |
| C  | 5.92744500 | 0.08297400  | -2.47113300 |
| H  | 5.71614300 | -0.95848800 | -2.73497400 |
| H  | 6.08016200 | 0.64471100  | -3.39963200 |
| H  | 6.86873700 | 0.10012000  | -1.90897100 |
| Cl | 0.84816800 | 0.43979600  | -2.55257200 |
| C  | 1.97925400 | 1.71540300  | 1.64592800  |
| O  | 1.19324900 | 0.74184300  | 1.94438100  |
| O  | 2.03538700 | 2.09319700  | 0.43934700  |
| C  | 2.82247300 | 2.35593200  | 2.71437800  |
| H  | 3.75917100 | 1.79605000  | 2.80011900  |
| H  | 3.05662100 | 3.38615400  | 2.44051500  |
| H  | 2.31022000 | 2.32118200  | 3.67827900  |

3\_ace

Zero-point = -3002.311332

|    |             |             |             |
|----|-------------|-------------|-------------|
| Ru | 0.46762500  | -1.60690700 | 0.22206200  |
| P  | 1.60243800  | 0.30221300  | -0.41755500 |
| P  | -1.53176000 | -0.49535500 | 0.13690400  |
| C  | -1.72356500 | 0.63553100  | -1.33256500 |
| H  | -1.74632100 | -0.07538900 | -2.16615500 |
| H  | -2.72003200 | 1.08307300  | -1.26035200 |
| C  | 0.76427500  | 1.18907600  | -1.82700100 |
| C  | -0.67907300 | 1.74586300  | -1.64565100 |
| C  | -1.04919300 | 2.34901100  | -3.03958400 |
| H  | -0.43876700 | 3.24218300  | -3.21863200 |
| H  | -0.82171300 | 1.63701200  | -3.84602900 |
| P  | -2.80556200 | 2.83072500  | -3.30837100 |
| H  | -2.70456300 | 3.49916300  | -4.55914500 |
| H  | -3.41125800 | 1.61043400  | -3.70684900 |
| O  | -3.52164200 | 3.57593800  | -2.21894400 |
| H  | 1.42137200  | 2.00697700  | -2.14251200 |



|   |             |             |             |
|---|-------------|-------------|-------------|
| H | 0.75740500  | 0.44493700  | -2.62903100 |
| C | -0.71989600 | 2.89297900  | -0.61489100 |
| H | -0.52340900 | 2.54550700  | 0.39894000  |
| H | 0.04190000  | 3.64186400  | -0.85552900 |
| H | -1.69497700 | 3.38482200  | -0.63236500 |
| C | -2.01495300 | 0.48655800  | 1.62119200  |
| C | -2.89371800 | 1.58488300  | 1.56144000  |
| C | -1.55074600 | 0.05635400  | 2.87779000  |
| C | -3.28307000 | 2.24282600  | 2.72995000  |
| H | -3.27755400 | 1.93735500  | 0.61157900  |
| C | -1.95000300 | 0.71435300  | 4.04368900  |
| H | -0.86953400 | -0.78423900 | 2.93861400  |
| C | -2.81324300 | 1.80920100  | 3.97220400  |
| H | -3.95427200 | 3.09156100  | 2.66694400  |
| H | -1.58539800 | 0.36968900  | 5.00510000  |
| H | -3.12019500 | 2.32118000  | 4.87703000  |
| C | -3.04065200 | -1.55365500 | -0.09222900 |
| C | -3.03340100 | -2.55562600 | -1.08380700 |
| C | -4.19545000 | -1.38634100 | 0.69273300  |
| C | -4.15685600 | -3.35962800 | -1.28296500 |
| H | -2.14638100 | -2.70912900 | -1.68859700 |
| C | -5.31406600 | -2.19818000 | 0.48861000  |
| H | -4.22402700 | -0.62621300 | 1.46190900  |
| C | -5.29912600 | -3.18453600 | -0.49825000 |
| H | -4.13434600 | -4.12622500 | -2.04951000 |
| H | -6.19533600 | -2.05711900 | 1.10413800  |
| H | -6.16836100 | -3.81357700 | -0.65260900 |
| C | 1.98434100  | 1.63823400  | 0.79245100  |
| C | 2.63452500  | 2.81591200  | 0.37007800  |
| C | 1.61218500  | 1.51352500  | 2.13922400  |
| C | 2.88613500  | 3.84742200  | 1.27260200  |
| H | 2.95628300  | 2.91883500  | -0.66028500 |
| C | 1.86463500  | 2.55364100  | 3.04027100  |
| H | 1.13813400  | 0.60351300  | 2.47931300  |
| C | 2.49522900  | 3.72029100  | 2.61005800  |
| H | 3.38566400  | 4.74861900  | 0.93565300  |
| H | 1.56199300  | 2.44727700  | 4.07577400  |
| H | 2.68657600  | 4.52629100  | 3.30908400  |
| C | 3.26858400  | -0.06316700 | -1.12604100 |
| C | 3.37971500  | -0.74973900 | -2.34993100 |
| C | 4.44241400  | 0.27024500  | -0.42659400 |
| C | 4.63563300  | -1.06812300 | -2.86771900 |
| H | 2.48915500  | -1.07666200 | -2.87147200 |
| C | 5.69522800  | -0.05876400 | -0.94812400 |
| H | 4.38040200  | 0.79024400  | 0.52080000  |
| C | 5.79583900  | -0.72247200 | -2.17161100 |
| H | 4.70411900  | -1.59995500 | -3.80991200 |
| H | 6.59033200  | 0.20489500  | -0.39605000 |

|    |             |             |             |
|----|-------------|-------------|-------------|
| H  | 6.76938500  | -0.97622000 | -2.57509600 |
| Cl | 0.24733400  | -2.22161200 | -2.15746200 |
| C  | 2.16993800  | -2.32907100 | 1.99457300  |
| O  | 2.36632200  | -2.64910300 | 0.78808500  |
| O  | 1.14306200  | -1.60995600 | 2.28063100  |
| C  | 3.08691700  | -2.79354000 | 3.09549100  |
| H  | 3.26086800  | -1.98436400 | 3.80915000  |
| H  | 2.61178500  | -3.61897900 | 3.63676400  |
| H  | 4.03173000  | -3.14269800 | 2.67718900  |
| H  | -0.12490600 | -3.35388800 | 0.31808700  |
| H  | -0.57611300 | -2.99661100 | 0.86499900  |

Ts3\_ace

Zero-point = -3002.248117

|    |             |             |             |
|----|-------------|-------------|-------------|
| Ru | 0.35240908  | 1.56368040  | -0.15059878 |
| P  | 1.78979180  | -0.48724508 | 0.27525994  |
| P  | -1.58339083 | 0.37492539  | 0.03446511  |
| C  | -1.52862054 | -1.08668802 | 1.20262473  |
| H  | -1.41886151 | -0.61856418 | 2.18812521  |
| H  | -2.53383476 | -1.51682422 | 1.16852151  |
| C  | 0.97450110  | -1.74661575 | 1.37998920  |
| C  | -0.47418169 | -2.22446426 | 1.06714772  |
| C  | -0.78687054 | -3.27910923 | 2.17914787  |
| H  | -0.16655393 | -4.16790327 | 2.01310731  |
| H  | -0.52779086 | -2.88858048 | 3.17391674  |
| P  | -2.53108208 | -3.85385350 | 2.32786001  |
| H  | -2.37193825 | -4.96417925 | 3.20087230  |
| H  | -3.10476466 | -2.90114694 | 3.20979302  |
| O  | -3.31132322 | -4.11222280 | 1.07035627  |
| H  | 1.61738932  | -2.63331573 | 1.42025589  |
| H  | 0.99430470  | -1.27518318 | 2.36949389  |
| C  | -0.53247305 | -2.94721130 | -0.29370730 |
| H  | -0.36033152 | -2.26850320 | -1.12870003 |
| H  | 0.24392787  | -3.71914741 | -0.33767117 |
| H  | -1.50127878 | -3.42886346 | -0.43595670 |
| C  | -2.28615714 | -0.28419225 | -1.53970360 |
| C  | -3.16278913 | -1.38609501 | -1.58562636 |
| C  | -1.97161304 | 0.38550387  | -2.73691031 |
| C  | -3.69473219 | -1.81260350 | -2.80408043 |
| H  | -3.42866733 | -1.93004043 | -0.68659350 |
| C  | -2.51277924 | -0.04489338 | -3.95134704 |
| H  | -1.31565353 | 1.24782291  | -2.71273831 |
| C  | -3.37084020 | -1.14502839 | -3.98811881 |
| H  | -4.36030010 | -2.66781698 | -2.82425299 |
| H  | -2.26537734 | 0.48402639  | -4.86521392 |
| H  | -3.78745751 | -1.48000765 | -4.93117290 |
| C  | -3.03967793 | 1.25321976  | 0.76860312  |
| C  | -4.29692827 | 1.27611347  | 0.14261898  |

|    |             |             |             |
|----|-------------|-------------|-------------|
| C  | -2.87971341 | 1.91983178  | 1.99977366  |
| C  | -5.36991151 | 1.94682270  | 0.73621805  |
| H  | -4.44018188 | 0.77457393  | -0.80546927 |
| C  | -3.95716327 | 2.58188538  | 2.58877978  |
| H  | -1.91336923 | 1.93401658  | 2.49221694  |
| C  | -5.20444958 | 2.59799423  | 1.95880295  |
| H  | -6.33312040 | 1.95915277  | 0.23878188  |
| H  | -3.81765628 | 3.09131931  | 3.53560641  |
| H  | -6.03832477 | 3.11833762  | 2.41587944  |
| C  | 2.30416018  | -1.41862890 | -1.23226356 |
| C  | 3.25756282  | -2.45036303 | -1.17736449 |
| C  | 1.72948510  | -1.08568824 | -2.47024676 |
| C  | 3.60982169  | -3.14570573 | -2.33461351 |
| H  | 3.74032742  | -2.69353984 | -0.23737335 |
| C  | 2.08374766  | -1.78508751 | -3.62652437 |
| H  | 0.99911338  | -0.28469901 | -2.52444601 |
| C  | 3.02092648  | -2.81724789 | -3.55943817 |
| H  | 4.34745996  | -3.93843961 | -2.28271607 |
| H  | 1.62825597  | -1.52207000 | -4.57442156 |
| H  | 3.29760186  | -3.35911853 | -4.45638108 |
| C  | 3.39598238  | -0.20054399 | 1.12582800  |
| C  | 3.95826532  | -1.09151827 | 2.05672827  |
| C  | 4.09692221  | 0.97517269  | 0.79821396  |
| C  | 5.20018486  | -0.81922146 | 2.63515578  |
| H  | 3.43212183  | -1.99186913 | 2.34895143  |
| C  | 5.33903004  | 1.23831660  | 1.37702931  |
| H  | 3.65633935  | 1.69204831  | 0.11473749  |
| C  | 5.89418967  | 0.34270439  | 2.29360390  |
| H  | 5.62032151  | -1.51202668 | 3.35552930  |
| H  | 5.86460914  | 2.15124259  | 1.12148805  |
| H  | 6.85567740  | 0.55386000  | 2.74716767  |
| Cl | 0.70273674  | 1.71086334  | 2.90932992  |
| C  | 1.26505266  | 3.26254138  | -1.78915106 |
| O  | 0.10391012  | 2.71433773  | -1.88063765 |
| O  | 1.99013617  | 2.94382081  | -0.80425610 |
| C  | 1.70248066  | 4.26661164  | -2.81850609 |
| H  | 1.52724863  | 5.27470245  | -2.42705502 |
| H  | 2.77199684  | 4.16140587  | -3.01246463 |
| H  | 1.13183316  | 4.14801969  | -3.74111363 |
| H  | 0.32156493  | 2.16554457  | 1.44494361  |
| H  | -0.52026200 | 2.77050738  | 0.35560209  |

4\_ace

Zero-point = -3002.256073

|    |             |             |             |
|----|-------------|-------------|-------------|
| Ru | 0.34730900  | 1.34506000  | -0.72964700 |
| P  | 1.73393500  | -0.29319800 | 0.37000200  |
| P  | -1.61180600 | 0.44416500  | -0.05780500 |
| C  | -1.58207600 | -0.74311000 | 1.39448300  |

|   |             |             |             |
|---|-------------|-------------|-------------|
| H | -1.48910400 | -0.09147300 | 2.27254800  |
| H | -2.57316500 | -1.19807700 | 1.45233600  |
| C | 0.90855400  | -1.26202100 | 1.74341200  |
| C | -0.50264400 | -1.85905000 | 1.48003300  |
| C | -0.80464600 | -2.73579300 | 2.73842200  |
| H | -0.16638400 | -3.62709700 | 2.71358600  |
| H | -0.55781600 | -2.19295800 | 3.66303900  |
| P | -2.53604300 | -3.31121100 | 2.97972600  |
| H | -2.35890800 | -4.26466000 | 4.01941500  |
| H | -3.12579700 | -2.24039100 | 3.70311600  |
| O | -3.31603700 | -3.77995200 | 1.78486300  |
| H | 1.58270200  | -2.07142700 | 2.04822800  |
| H | 0.82860400  | -0.56629500 | 2.58775800  |
| C | -0.50031000 | -2.78050200 | 0.24457500  |
| H | -0.35274800 | -2.21503700 | -0.67711000 |
| H | 0.31224200  | -3.51092600 | 0.31959000  |
| H | -1.44365500 | -3.32333800 | 0.16232700  |
| C | -2.57898700 | -0.44151300 | -1.36392300 |
| C | -3.38528500 | -1.57094100 | -1.12905300 |
| C | -2.54784500 | 0.11008500  | -2.65919800 |
| C | -4.13788800 | -2.12936300 | -2.16599600 |
| H | -3.43122800 | -2.04713500 | -0.15689900 |
| C | -3.30727300 | -0.44941900 | -3.68753800 |
| H | -1.91215400 | 0.96475000  | -2.85416700 |
| C | -4.10411300 | -1.57018800 | -3.44427000 |
| H | -4.74722400 | -3.00386700 | -1.96770800 |
| H | -3.27084800 | -0.01153200 | -4.67888400 |
| H | -4.69064400 | -2.00665000 | -4.24484100 |
| C | -2.93455300 | 1.59221700  | 0.57865300  |
| C | -4.14506400 | 1.09800400  | 1.10189100  |
| C | -2.74525100 | 2.98226300  | 0.52714600  |
| C | -5.12028800 | 1.96997600  | 1.58554600  |
| H | -4.34568000 | 0.03296300  | 1.10610900  |
| C | -3.72483600 | 3.85464800  | 1.01108400  |
| H | -1.84250600 | 3.37339500  | 0.07339200  |
| C | -4.90955500 | 3.35149500  | 1.54820500  |
| H | -6.04835900 | 1.57244400  | 1.98103600  |
| H | -3.56165100 | 4.92542700  | 0.95922700  |
| H | -5.66977100 | 4.02755100  | 1.92258300  |
| C | 2.68096000  | -1.61218200 | -0.52288500 |
| C | 3.76019900  | -2.29176600 | 0.07119000  |
| C | 2.28995400  | -1.96296400 | -1.82717400 |
| C | 4.42155100  | -3.30879100 | -0.61796300 |
| H | 4.09515500  | -2.01474600 | 1.06478100  |
| C | 2.95585000  | -2.98348300 | -2.51236000 |
| H | 1.47468600  | -1.42875300 | -2.30126300 |
| C | 4.01813900  | -3.65891000 | -1.91000300 |
| H | 5.25354900  | -3.82385200 | -0.15075000 |

|    |             |             |             |
|----|-------------|-------------|-------------|
| H  | 2.64313600  | -3.24702600 | -3.51661100 |
| H  | 4.53397300  | -4.44885700 | -2.44389400 |
| C  | 3.10905500  | 0.51935500  | 1.32828500  |
| C  | 3.48547400  | 0.18906800  | 2.64236500  |
| C  | 3.77680100  | 1.59097600  | 0.68941800  |
| C  | 4.49673100  | 0.89933000  | 3.29742000  |
| H  | 2.99438900  | -0.62129700 | 3.16662600  |
| C  | 4.78588900  | 2.29783900  | 1.35127300  |
| H  | 3.50346000  | 1.85533800  | -0.32856600 |
| C  | 5.14687800  | 1.95524000  | 2.65702200  |
| H  | 4.77241600  | 0.62750700  | 4.31029900  |
| H  | 5.28713300  | 3.11427700  | 0.84339000  |
| H  | 5.92592100  | 2.50681000  | 3.17008700  |
| Cl | 0.68305600  | 2.94286800  | 1.23864900  |
| C  | 1.56924200  | 1.34426900  | -2.95534500 |
| O  | 2.02850000  | 2.07338800  | -2.02503000 |
| O  | 0.55975300  | 0.59672400  | -2.70692700 |
| C  | 2.15999300  | 1.37311600  | -4.34014100 |
| H  | 1.97927800  | 0.42765200  | -4.85502600 |
| H  | 1.68269400  | 2.17494200  | -4.91471700 |
| H  | 3.23049300  | 1.58210900  | -4.28967200 |
| H  | 1.96374200  | 2.72393100  | 1.37827100  |
| H  | -0.54643200 | 2.50996600  | -1.41971500 |

**S9. Cartesian coordinates (Å) and zero-point corrected energies, (Hartrees) of optimized structures of stationary points for the formation of the active specie Ru<sub>2</sub><sub>ace</sub> H in presence of hexanoate anion.**

Hexanoate

Zero=point = -385.61162

|   |             |             |             |
|---|-------------|-------------|-------------|
| C | -2.48637300 | 0.05976400  | 0.03076800  |
| O | -3.47422700 | -0.68084400 | -0.19239900 |
| O | -2.43856400 | 1.30411200  | 0.21744000  |
| C | -1.10002800 | -0.69193200 | 0.13406700  |
| H | -0.99628700 | -1.04182900 | 1.17494100  |
| H | -1.14015600 | -1.59611900 | -0.48762600 |
| C | 0.10308800  | 0.18282900  | -0.22019900 |
| H | -0.04007500 | 1.13936300  | 0.29634600  |
| H | 0.07614600  | 0.42208600  | -1.29438400 |
| C | 1.46977400  | -0.42468800 | 0.12136300  |
| H | 1.58963800  | -1.39137900 | -0.39301400 |
| H | 1.50660300  | -0.65555700 | 1.19750100  |
| C | 2.65901300  | 0.47768800  | -0.23483600 |
| H | 2.54286600  | 1.44248400  | 0.27794800  |
| H | 2.62972600  | 0.70541600  | -1.30979500 |
| C | 4.02226500  | -0.12708800 | 0.11855800  |
| H | 4.18046000  | -1.07809200 | -0.40486400 |
| H | 4.85056000  | 0.54050900  | -0.14919700 |
| H | 4.09640800  | -0.33246700 | 1.19349600  |

1\_hex

Zero-point = -3547.553825

|    |             |             |             |
|----|-------------|-------------|-------------|
| Ru | -0.75874900 | 1.06350200  | -0.62928900 |
| P  | -0.20694700 | 0.41457000  | 1.58183400  |
| P  | -2.16162400 | -0.78076500 | -0.77350500 |
| C  | -3.26102800 | -1.03780800 | 0.70679000  |
| H  | -3.90138700 | -0.15298700 | 0.73901600  |
| H  | -3.88407200 | -1.90460400 | 0.46360700  |
| C  | -1.72469300 | -0.06066400 | 2.55706900  |
| C  | -2.62034400 | -1.25567200 | 2.10833000  |
| C  | -3.78557300 | -1.27746000 | 3.15095600  |
| H  | -3.38955200 | -1.59994500 | 4.12108400  |
| H  | -4.19984600 | -0.26856300 | 3.29319200  |
| P  | -5.24727200 | -2.33598800 | 2.78966600  |
| H  | -5.96102500 | -2.20691400 | 4.01260100  |
| H  | -6.02821900 | -1.50711800 | 1.93997700  |
| O  | -5.02667700 | -3.73441300 | 2.29498700  |
| H  | -1.41346900 | -0.22596800 | 3.59269900  |
| H  | -2.33816200 | 0.84172400  | 2.54460200  |
| C  | -1.88173500 | -2.60653900 | 2.19645200  |
| H  | -1.02871000 | -2.65767000 | 1.52077700  |
| H  | -1.49927400 | -2.76105300 | 3.21031900  |
| H  | -2.56331500 | -3.42730200 | 1.96039200  |
| C  | -1.52084000 | -2.47128200 | -1.10839900 |
| C  | -2.41736700 | -3.54648300 | -1.28222300 |
| C  | -0.14386600 | -2.72540400 | -1.13482800 |
| C  | -1.93478100 | -4.83944700 | -1.47477400 |
| H  | -3.48794000 | -3.37580800 | -1.26955100 |
| C  | 0.33723900  | -4.02405200 | -1.32854000 |
| H  | 0.55374900  | -1.91537800 | -0.98692000 |
| C  | -0.55648200 | -5.08054700 | -1.49768400 |
| H  | -2.63288000 | -5.65894300 | -1.59916800 |
| H  | 1.40663000  | -4.19934200 | -1.33650400 |
| H  | -0.18593700 | -6.08860800 | -1.64243400 |
| C  | -3.38380300 | -0.54277900 | -2.14065800 |
| C  | -4.40388900 | 0.42102600  | -2.02085100 |
| C  | -3.24441700 | -1.23342100 | -3.35941300 |
| C  | -5.26702900 | 0.67182400  | -3.08926600 |
| H  | -4.49943600 | 1.00112700  | -1.11131000 |
| C  | -4.10702700 | -0.97046600 | -4.42646300 |
| H  | -2.47262600 | -1.98536600 | -3.47041300 |
| C  | -5.12174100 | -0.02095500 | -4.29371500 |
| H  | -6.05037600 | 1.41339400  | -2.97976200 |
| H  | -3.98796200 | -1.51399500 | -5.35685800 |
| H  | -5.79299000 | 0.17786300  | -5.12100600 |
| C  | 1.04162400  | -0.86445700 | 2.02445800  |
| C  | 1.09476900  | -1.35381600 | 3.34802200  |

|    |             |             |             |
|----|-------------|-------------|-------------|
| C  | 2.00669500  | -1.29864400 | 1.10935800  |
| C  | 2.05465600  | -2.29245600 | 3.71710400  |
| H  | 0.40225600  | -0.99356200 | 4.09887300  |
| C  | 2.97512000  | -2.23703000 | 1.48571000  |
| H  | 2.08101500  | -0.88748500 | 0.11270400  |
| C  | 2.99186000  | -2.74573400 | 2.78138700  |
| H  | 2.07944200  | -2.66172800 | 4.73618300  |
| H  | 3.72041200  | -2.51406600 | 0.75076300  |
| H  | 3.74133700  | -3.47222900 | 3.07395300  |
| C  | 0.45741800  | 1.87026100  | 2.49686900  |
| C  | -0.35600100 | 2.73721800  | 3.24564600  |
| C  | 1.83318600  | 2.15462000  | 2.36293800  |
| C  | 0.19726200  | 3.86346400  | 3.86205600  |
| H  | -1.41856700 | 2.55489600  | 3.34017100  |
| C  | 2.37078000  | 3.28828500  | 2.97516400  |
| H  | 2.48886500  | 1.51929600  | 1.77036500  |
| C  | 1.55861100  | 4.14128800  | 3.72809200  |
| H  | -0.43911100 | 4.52205000  | 4.44266000  |
| H  | 3.42840000  | 3.49581600  | 2.86008800  |
| H  | 1.98385300  | 5.01657100  | 4.20585900  |
| C  | 0.79807300  | 0.69787600  | -2.39720300 |
| C  | -0.45947100 | 1.16626500  | -2.89746300 |
| C  | -1.00625400 | 2.38950100  | -2.47132900 |
| C  | -0.30451800 | 3.22922900  | -1.53727400 |
| C  | 0.87343700  | 2.71983000  | -0.96967600 |
| C  | 1.40879000  | 1.45590500  | -1.36834900 |
| H  | -1.00913000 | 0.56453700  | -3.61467100 |
| H  | -1.97468500 | 2.70233900  | -2.84588000 |
| H  | 1.39210800  | 3.26898200  | -0.19409400 |
| H  | 2.35446200  | 1.13737900  | -0.89699500 |
| C  | 1.50434500  | -0.47298100 | -3.02561100 |
| H  | 0.81843400  | -1.28678100 | -3.27505200 |
| H  | 1.95324800  | -0.12407900 | -3.96526200 |
| H  | 2.32535900  | -0.82362400 | -2.38943500 |
| C  | -0.86704900 | 4.60032100  | -1.21256900 |
| H  | -1.95194300 | 4.47513700  | -1.11999400 |
| C  | -0.34832700 | 5.20075300  | 0.09893800  |
| H  | 0.72200600  | 5.42929200  | 0.04696200  |
| H  | -0.87097200 | 6.14096300  | 0.30072300  |
| H  | -0.51877900 | 4.52935400  | 0.94348300  |
| C  | -0.59015000 | 5.54364600  | -2.40537000 |
| H  | -0.99926600 | 5.15198800  | -3.34228100 |
| H  | -1.04776400 | 6.52068800  | -2.22087300 |
| H  | 0.48584300  | 5.69548200  | -2.54404600 |
| Cl | -2.66063400 | 2.24437400  | 0.40875800  |
| C  | 4.55342600  | 0.08679100  | -0.41706900 |
| O  | 4.04551800  | -0.84043700 | -1.10881900 |
| O  | 3.93737700  | 1.08242900  | 0.06975900  |

|   |             |             |             |
|---|-------------|-------------|-------------|
| C | 6.05742100  | -0.01306100 | -0.08154500 |
| H | 6.45377900  | 1.00371100  | 0.02080700  |
| H | 6.12889800  | -0.46395300 | 0.92045100  |
| C | 6.87918700  | -0.83632700 | -1.07582800 |
| H | 6.39196300  | -1.80958700 | -1.20373800 |
| H | 6.83931500  | -0.35540300 | -2.06316900 |
| C | 8.34336300  | -1.02301900 | -0.66035000 |
| H | 8.81796000  | -0.03950600 | -0.52632000 |
| H | 8.38413200  | -1.51047900 | 0.32548400  |
| C | 9.16660200  | -1.84469300 | -1.66084600 |
| H | 8.69405500  | -2.82754200 | -1.79491300 |
| H | 9.12978800  | -1.35688500 | -2.64471500 |
| C | 10.62773300 | -2.03319600 | -1.23962000 |
| H | 11.18791400 | -2.62247400 | -1.97400100 |
| H | 11.13610800 | -1.06789100 | -1.13105800 |
| H | 10.69841900 | -2.55033000 | -0.27540400 |

Ts1\_hex

Zero-point = -3547.532945

|    |             |             |             |
|----|-------------|-------------|-------------|
| Ru | -0.63009000 | 1.05895900  | -0.52071400 |
| P  | -0.01291300 | 0.42273000  | 1.63963700  |
| P  | -1.91783800 | -0.78680800 | -0.69092400 |
| C  | -2.98555800 | -1.13374600 | 0.79367300  |
| H  | -3.67440700 | -0.28412900 | 0.81805900  |
| H  | -3.57029900 | -2.02507900 | 0.54406300  |
| C  | -1.50830000 | -0.08380500 | 2.64340800  |
| C  | -2.35109300 | -1.31757600 | 2.20094900  |
| C  | -3.52191300 | -1.38830400 | 3.23509100  |
| H  | -3.12097000 | -1.70574300 | 4.20480900  |
| H  | -3.97353300 | -0.39653400 | 3.38345800  |
| P  | -4.93953600 | -2.49566800 | 2.84422600  |
| H  | -5.65902100 | -2.43769100 | 4.06927400  |
| H  | -5.75615500 | -1.67622200 | 2.01969100  |
| O  | -4.66121000 | -3.86803000 | 2.30473100  |
| H  | -1.16240700 | -0.24774400 | 3.66937400  |
| H  | -2.16520500 | 0.78773000  | 2.64296000  |
| C  | -1.56164900 | -2.63857100 | 2.30215900  |
| H  | -0.74723000 | -2.69237400 | 1.58193100  |
| H  | -1.11783800 | -2.73595100 | 3.29840900  |
| H  | -2.22708400 | -3.48944600 | 2.13639000  |
| C  | -1.11435500 | -2.37640500 | -1.13087900 |
| C  | -1.81042400 | -3.60076400 | -1.04729700 |
| C  | 0.20615300  | -2.37193100 | -1.60334800 |
| C  | -1.18445500 | -4.78895400 | -1.42133700 |
| H  | -2.83289800 | -3.63504600 | -0.68848300 |
| C  | 0.82976400  | -3.56869200 | -1.97325500 |
| H  | 0.79552300  | -1.46129000 | -1.66335700 |
| C  | 0.13678200  | -4.77499600 | -1.88447100 |



|   |             |             |             |
|---|-------------|-------------|-------------|
| H | -1.72515100 | -5.72527800 | -1.34466000 |
| H | 1.85984600  | -3.52915900 | -2.30736600 |
| H | 0.61944500  | -5.70382900 | -2.16678400 |
| C | -3.21217500 | -0.61890300 | -2.00579800 |
| C | -4.18993600 | 0.39084300  | -1.89895600 |
| C | -3.20447000 | -1.43694300 | -3.14975100 |
| C | -5.13664300 | 0.56652100  | -2.90919100 |
| H | -4.18892300 | 1.05768700  | -1.04430900 |
| C | -4.15286700 | -1.25061300 | -4.15936400 |
| H | -2.46607000 | -2.22231400 | -3.24845700 |
| C | -5.12048900 | -0.25184500 | -4.04208900 |
| H | -5.88421300 | 1.34593300  | -2.81190700 |
| H | -4.13438000 | -1.89054100 | -5.03420600 |
| H | -5.85538400 | -0.11091700 | -4.82613600 |
| C | 1.20163100  | -0.84885600 | 2.21340100  |
| C | 1.53765600  | -0.86052000 | 3.58121600  |
| C | 1.72760900  | -1.84105900 | 1.37893900  |
| C | 2.37044900  | -1.85395900 | 4.09754400  |
| H | 1.16685700  | -0.08294700 | 4.23994100  |
| C | 2.55806700  | -2.83652400 | 1.90034300  |
| H | 1.52023800  | -1.83115400 | 0.32163700  |
| C | 2.87872600  | -2.84872400 | 3.25868900  |
| H | 2.62597000  | -1.84574100 | 5.15116700  |
| H | 2.95649700  | -3.59419900 | 1.23557400  |
| H | 3.52577700  | -3.62025700 | 3.65996400  |
| C | 0.59683500  | 1.91846600  | 2.52832300  |
| C | -0.22526200 | 2.71685900  | 3.34147000  |
| C | 1.94478600  | 2.28789500  | 2.33385900  |
| C | 0.29369200  | 3.85528900  | 3.96468600  |
| H | -1.26872900 | 2.46963200  | 3.48555000  |
| C | 2.44972300  | 3.42859300  | 2.95994500  |
| H | 2.56889300  | 1.69036800  | 1.67287400  |
| C | 1.63037100  | 4.21134900  | 3.77896600  |
| H | -0.34950300 | 4.46143800  | 4.59289400  |
| H | 3.48717300  | 3.70496900  | 2.80653600  |
| H | 2.02960000  | 5.09464400  | 4.26464900  |
| C | 0.55058000  | 1.09923400  | -3.12461000 |
| C | -0.78888300 | 1.54539900  | -2.95375300 |
| C | -1.07380100 | 2.70135700  | -2.21352500 |
| C | -0.04315300 | 3.43946400  | -1.55659600 |
| C | 1.24742200  | 2.90661200  | -1.61981700 |
| C | 1.54045300  | 1.77233400  | -2.40808200 |
| H | -1.59560400 | 1.03204000  | -3.46569200 |
| H | -2.09612400 | 3.05753700  | -2.16172300 |
| H | 2.05719200  | 3.36898000  | -1.06937200 |
| H | 2.55464000  | 1.40318200  | -2.44948500 |
| C | 0.90034500  | -0.02770000 | -4.05941000 |
| H | 0.06235000  | -0.71782900 | -4.19034200 |

|    |             |             |             |
|----|-------------|-------------|-------------|
| H  | 1.15295500  | 0.37471100  | -5.04892800 |
| H  | 1.76400600  | -0.57521500 | -3.67359600 |
| C  | -0.38528500 | 4.76003500  | -0.88440100 |
| H  | -1.30745600 | 4.58832700  | -0.31620000 |
| C  | 0.68430500  | 5.26570800  | 0.09077200  |
| H  | 1.61047400  | 5.53606700  | -0.43038300 |
| H  | 0.32361800  | 6.16735200  | 0.59559900  |
| H  | 0.92554700  | 4.52659800  | 0.85785800  |
| C  | -0.68678300 | 5.82507100  | -1.96209100 |
| H  | -1.48350300 | 5.50553100  | -2.64131100 |
| H  | -1.00383600 | 6.76097100  | -1.49017300 |
| H  | 0.20446000  | 6.03554200  | -2.56423700 |
| Cl | -2.46065500 | 2.24739900  | 0.51972000  |
| C  | 3.35891200  | -0.25819100 | -0.71927900 |
| O  | 2.97342200  | -0.99877200 | -1.66303800 |
| O  | 2.64325600  | 0.58829400  | -0.09709000 |
| C  | 4.81919000  | -0.39413800 | -0.23960300 |
| H  | 5.18139600  | 0.60095600  | 0.04664500  |
| H  | 4.78581100  | -0.97718300 | 0.69260300  |
| C  | 5.76473200  | -1.06094800 | -1.24047300 |
| H  | 5.32988500  | -2.02021300 | -1.54327900 |
| H  | 5.80817900  | -0.45651300 | -2.15711200 |
| C  | 7.18441100  | -1.26855500 | -0.69932500 |
| H  | 7.60840400  | -0.30057600 | -0.39311600 |
| H  | 7.14097400  | -1.87789200 | 0.21582300  |
| C  | 8.13288300  | -1.93644400 | -1.70336500 |
| H  | 7.71124400  | -2.90406500 | -2.00848100 |
| H  | 8.17872000  | -1.32717900 | -2.61659400 |
| C  | 9.54943300  | -2.14526200 | -1.15800400 |
| H  | 10.20100000 | -2.62283600 | -1.89790900 |
| H  | 10.01011700 | -1.19103100 | -0.87662700 |
| H  | 9.54029800  | -2.78042800 | -0.26443600 |

2\_hex

Zero-point = -3547.604958

|    |             |             |             |
|----|-------------|-------------|-------------|
| Ru | -0.21206900 | 0.24879700  | -0.38392500 |
| P  | 0.28883000  | -1.91447600 | -0.58147700 |
| P  | 1.94295800  | 0.76644800  | 0.14810200  |
| C  | 3.22877900  | -0.12317100 | -0.86807600 |
| H  | 3.07724400  | 0.30409700  | -1.86541400 |
| H  | 4.20990300  | 0.21211600  | -0.51747400 |
| C  | 1.86601500  | -2.22221500 | -1.52719900 |
| C  | 3.21679400  | -1.67343400 | -0.98076700 |
| C  | 4.27549800  | -2.07359800 | -2.05858800 |
| H  | 4.41190200  | -3.16155400 | -2.04297700 |
| H  | 3.92622800  | -1.80805100 | -3.06695600 |
| P  | 5.94741400  | -1.31620900 | -1.91911300 |
| H  | 6.64727200  | -2.04534500 | -2.91923700 |

|   |             |             |             |
|---|-------------|-------------|-------------|
| H | 5.78223900  | -0.06498400 | -2.56907800 |
| O | 6.60090500  | -1.25611600 | -0.56877900 |
| H | 1.95549000  | -3.30446500 | -1.67333000 |
| H | 1.67131800  | -1.77384100 | -2.50614700 |
| C | 3.61785200  | -2.35281800 | 0.34486600  |
| H | 2.95550400  | -2.07982600 | 1.16590400  |
| H | 3.57470000  | -3.44187500 | 0.23972900  |
| H | 4.63979600  | -2.07856000 | 0.61640300  |
| C | 2.45448800  | 0.58512500  | 1.91154000  |
| C | 3.79121300  | 0.39034700  | 2.30612800  |
| C | 1.46847600  | 0.74192400  | 2.90358300  |
| C | 4.12745100  | 0.33603900  | 3.66017400  |
| H | 4.57647800  | 0.27688800  | 1.56829500  |
| C | 1.81329800  | 0.69578900  | 4.25719600  |
| H | 0.43486400  | 0.88989100  | 2.61259200  |
| C | 3.14077500  | 0.48945600  | 4.63759800  |
| H | 5.16004200  | 0.17654600  | 3.94867500  |
| H | 1.04320700  | 0.81959900  | 5.01088700  |
| H | 3.40688500  | 0.44973500  | 5.68772300  |
| C | 2.47339400  | 2.51942700  | -0.17742000 |
| C | 2.40001400  | 3.03714500  | -1.48637600 |
| C | 2.93185000  | 3.35822000  | 0.85498500  |
| C | 2.78428900  | 4.35288900  | -1.74974800 |
| H | 2.01281900  | 2.42030500  | -2.28924600 |
| C | 3.30832900  | 4.67621700  | 0.58380300  |
| H | 3.00077800  | 2.98372100  | 1.86775600  |
| C | 3.23831000  | 5.17646800  | -0.71694100 |
| H | 2.71997400  | 4.73487400  | -2.76259600 |
| H | 3.65897400  | 5.30834200  | 1.39186300  |
| H | 3.53140700  | 6.19928200  | -0.92392400 |
| C | 0.43925600  | -3.00479700 | 0.89949300  |
| C | 0.78785000  | -4.36225100 | 0.74332300  |
| C | 0.23419200  | -2.50062700 | 2.19203500  |
| C | 0.94682400  | -5.18430900 | 1.85738300  |
| H | 0.91926600  | -4.77952400 | -0.24891900 |
| C | 0.39770200  | -3.33014800 | 3.30693500  |
| H | -0.06429700 | -1.46971800 | 2.32027500  |
| C | 0.75832800  | -4.66695100 | 3.14356900  |
| H | 1.21616700  | -6.22598600 | 1.72444200  |
| H | 0.24504600  | -2.92392500 | 4.30038600  |
| H | 0.88810100  | -5.30659100 | 4.00897600  |
| C | -0.96260300 | -2.82039500 | -1.59491900 |
| C | -1.08904400 | -2.54270900 | -2.96883600 |
| C | -1.85616500 | -3.72997100 | -1.00091800 |
| C | -2.06880900 | -3.18173900 | -3.72961000 |
| H | -0.45812000 | -1.79416900 | -3.43192000 |
| C | -2.83961300 | -4.35877600 | -1.76724500 |
| H | -1.78198200 | -3.95139600 | 0.05625600  |

|    |             |             |             |
|----|-------------|-------------|-------------|
| C  | -2.94500300 | -4.09121700 | -3.13308000 |
| H  | -2.15496100 | -2.95606800 | -4.78653700 |
| H  | -3.52115200 | -5.05732000 | -1.29487700 |
| H  | -3.70887200 | -4.58071500 | -3.72632800 |
| C  | -1.83429000 | 3.80660900  | 1.69983800  |
| C  | -0.86267100 | 3.53695000  | 0.72602500  |
| C  | -1.22328800 | 3.26386000  | -0.59715400 |
| C  | -2.57039100 | 3.26058900  | -1.00282900 |
| C  | -3.53583800 | 3.53641900  | -0.02788500 |
| C  | -3.17410400 | 3.80079500  | 1.29677400  |
| H  | 0.18948900  | 3.55495300  | 0.99450800  |
| H  | -0.44683300 | 3.09130500  | -1.33701400 |
| H  | -4.58832100 | 3.55076200  | -0.29802300 |
| H  | -3.95125400 | 4.01533600  | 2.02789300  |
| C  | -1.43868100 | 4.12341200  | 3.12329600  |
| H  | -1.08137400 | 5.15668800  | 3.21859700  |
| H  | -2.28253800 | 4.00512300  | 3.80970100  |
| H  | -0.62917000 | 3.47054600  | 3.46613900  |
| C  | -2.93152100 | 3.02110600  | -2.46274200 |
| H  | -2.04468400 | 2.58662100  | -2.93861300 |
| C  | -4.08165700 | 2.01583800  | -2.64328700 |
| H  | -5.02459100 | 2.39852400  | -2.23421400 |
| H  | -4.24678800 | 1.82151500  | -3.70891100 |
| H  | -3.84687700 | 1.06874700  | -2.15096400 |
| C  | -3.24407300 | 4.35579400  | -3.16974000 |
| H  | -2.40763600 | 5.05753400  | -3.08636000 |
| H  | -3.44531300 | 4.19147400  | -4.23439700 |
| H  | -4.12693800 | 4.83618100  | -2.73150400 |
| Cl | 0.25643900  | 0.64347500  | -2.75414900 |
| C  | -2.42936600 | -0.04849500 | 0.84011700  |
| O  | -1.31258100 | 0.11950500  | 1.45785500  |
| O  | -2.40679800 | -0.12549500 | -0.42285300 |
| C  | -3.71346300 | -0.13690600 | 1.63047100  |
| H  | -3.99253900 | 0.89286200  | 1.89091700  |
| H  | -3.48693400 | -0.64053800 | 2.57755400  |
| C  | -4.86161800 | -0.82857000 | 0.88730200  |
| H  | -5.05091700 | -0.29535900 | -0.05064400 |
| H  | -4.55052700 | -1.84092100 | 0.59966400  |
| C  | -6.14761000 | -0.89747900 | 1.71947400  |
| H  | -5.94861000 | -1.42754500 | 2.66253000  |
| H  | -6.45378700 | 0.11980100  | 2.00432000  |
| C  | -7.30698200 | -1.58674900 | 0.98882200  |
| H  | -7.50545100 | -1.05682700 | 0.04754800  |
| H  | -7.00076000 | -2.60269900 | 0.70453500  |
| C  | -8.59210100 | -1.65350800 | 1.82007000  |
| H  | -8.94243900 | -0.65046700 | 2.08966200  |
| H  | -9.39919900 | -2.15042300 | 1.27164800  |
| H  | -8.43338400 | -2.20792000 | 2.75233400  |

3\_hex

Zero-point = -3159.460209

|    |             |             |             |
|----|-------------|-------------|-------------|
| Ru | 0.50500900  | -0.21315800 | -1.19323300 |
| P  | 0.08310400  | 1.75834700  | -0.06233500 |
| P  | -1.37490300 | -1.17048200 | -0.30397400 |
| C  | -2.86566200 | -0.05183600 | -0.26389600 |
| H  | -3.07956800 | 0.08004800  | -1.33053000 |
| H  | -3.68875700 | -0.63423400 | 0.16245700  |
| C  | -1.70614400 | 2.26894300  | -0.17154900 |
| C  | -2.81535000 | 1.34703700  | 0.41613600  |
| C  | -4.15657500 | 2.07461400  | 0.07606800  |
| H  | -4.22899300 | 2.99265800  | 0.67136300  |
| H  | -4.18081700 | 2.37428100  | -0.98159700 |
| P  | -5.71564700 | 1.13226200  | 0.34197300  |
| H  | -6.67915700 | 2.15566100  | 0.12803000  |
| H  | -5.84530600 | 0.38886300  | -0.86022000 |
| O  | -5.86856900 | 0.33737200  | 1.60681000  |
| H  | -1.79651100 | 3.26294200  | 0.28022500  |
| H  | -1.87322300 | 2.37972000  | -1.24712300 |
| C  | -2.71559800 | 1.24619400  | 1.95230000  |
| H  | -1.82774200 | 0.70308900  | 2.27476800  |
| H  | -2.66197900 | 2.24759800  | 2.39214500  |
| H  | -3.59774400 | 0.74576000  | 2.35777200  |
| C  | -1.22872600 | -1.91059900 | 1.37898600  |
| C  | -2.32590900 | -2.06128900 | 2.24816400  |
| C  | 0.02110200  | -2.42665600 | 1.76812200  |
| C  | -2.16906200 | -2.69847300 | 3.48080200  |
| H  | -3.30453400 | -1.68410100 | 1.97659000  |
| C  | 0.16957500  | -3.06974600 | 2.99940800  |
| H  | 0.87602400  | -2.31286400 | 1.11192600  |
| C  | -0.92266700 | -3.20408400 | 3.85848000  |
| H  | -3.02177200 | -2.80008100 | 4.14216400  |
| H  | 1.13864400  | -3.46434900 | 3.28451700  |
| H  | -0.80585800 | -3.70048400 | 4.81503500  |
| C  | -2.08917700 | -2.59676000 | -1.25524400 |
| C  | -2.24478300 | -2.48217100 | -2.65159400 |
| C  | -2.48469700 | -3.79043200 | -0.62560400 |
| C  | -2.78796100 | -3.53484300 | -3.38994700 |
| H  | -1.93256200 | -1.57428200 | -3.15602200 |
| C  | -3.02429400 | -4.84012500 | -1.37324600 |
| H  | -2.37202600 | -3.90345000 | 0.44437800  |
| C  | -3.17839700 | -4.71592400 | -2.75452900 |
| H  | -2.90018000 | -3.43051300 | -4.46339800 |
| H  | -3.32211500 | -5.75428000 | -0.87221200 |
| H  | -3.59596700 | -5.53314700 | -3.33148300 |
| C  | 0.49921200  | 1.94443700  | 1.72275000  |
| C  | 0.19033900  | 3.13902300  | 2.40500000  |

|    |             |             |             |
|----|-------------|-------------|-------------|
| C  | 1.10304000  | 0.89450700  | 2.43046000  |
| C  | 0.46412700  | 3.26745500  | 3.76532500  |
| H  | -0.25030500 | 3.97216100  | 1.86877900  |
| C  | 1.37277200  | 1.02787200  | 3.79680500  |
| H  | 1.36791600  | -0.01561600 | 1.91069700  |
| C  | 1.05115100  | 2.20800900  | 4.46591300  |
| H  | 0.22107200  | 4.19046200  | 4.27933500  |
| H  | 1.82996200  | 0.20402200  | 4.33296200  |
| H  | 1.25777600  | 2.30789900  | 5.52526500  |
| C  | 0.94575100  | 3.20877900  | -0.81267600 |
| C  | 0.57884100  | 3.66218600  | -2.09389400 |
| C  | 2.02169300  | 3.83199200  | -0.15522100 |
| C  | 1.25757200  | 4.72822900  | -2.68515900 |
| H  | -0.20116200 | 3.15415900  | -2.64663800 |
| C  | 2.70059400  | 4.89332900  | -0.75723200 |
| H  | 2.32674900  | 3.49412900  | 0.82696300  |
| C  | 2.31725700  | 5.34816800  | -2.01963600 |
| H  | 0.96497200  | 5.06340200  | -3.67374900 |
| H  | 3.52838200  | 5.36232100  | -0.23730300 |
| H  | 2.84520000  | 6.17265500  | -2.48489800 |
| Cl | -0.81075800 | 0.64503900  | -3.09642600 |
| C  | 3.03026700  | -0.21448100 | -0.75629700 |
| O  | 2.57456700  | 0.43666900  | -1.73981300 |
| O  | 2.19727700  | -0.82434800 | 0.01169700  |
| C  | 4.51127200  | -0.28302400 | -0.46689800 |
| H  | 4.69807500  | 0.31456500  | 0.43606100  |
| H  | 5.03762200  | 0.20198000  | -1.29401200 |
| H  | 0.90454400  | -1.42742700 | -2.52666000 |
| H  | 0.76597000  | -1.90335600 | -1.90655000 |
| C  | 5.01971300  | -1.71706300 | -0.24466200 |
| H  | 4.44049800  | -2.17769400 | 0.56385500  |
| H  | 4.82288900  | -2.31312100 | -1.14596800 |
| C  | 6.51558700  | -1.77305700 | 0.08650100  |
| H  | 6.71116700  | -1.17386900 | 0.98771200  |
| H  | 7.08781500  | -1.29805300 | -0.72307100 |
| C  | 7.03627100  | -3.19949300 | 0.30423600  |
| H  | 6.46267000  | -3.67388700 | 1.11217100  |
| H  | 6.84061600  | -3.79651700 | -0.59676500 |
| C  | 8.53050700  | -3.25255300 | 0.63796900  |
| H  | 8.75242600  | -2.69313100 | 1.55406100  |
| H  | 8.87125700  | -4.28238100 | 0.78690400  |
| H  | 9.13216100  | -2.81668700 | -0.16778400 |

Ts3\_hex

Zero-point = -3159.401489

|    |             |             |             |
|----|-------------|-------------|-------------|
| Ru | 0.52972100  | -0.61523800 | -0.83269600 |
| P  | 0.37642400  | 1.73904500  | -0.17225900 |
| P  | -1.65793900 | -1.08970600 | -0.27570900 |

|   |             |             |             |
|---|-------------|-------------|-------------|
| C | -2.85312900 | 0.34521500  | -0.31652300 |
| H | -2.99415000 | 0.52855400  | -1.38884900 |
| H | -3.80380300 | -0.03911900 | 0.06085900  |
| C | -1.35187100 | 2.44357500  | -0.29537900 |
| C | -2.53136400 | 1.69564700  | 0.38656300  |
| C | -3.76702200 | 2.63443600  | 0.18998400  |
| H | -3.64357500 | 3.52152700  | 0.82223800  |
| H | -3.83001500 | 2.98863000  | -0.84930800 |
| P | -5.42737400 | 1.92640600  | 0.55746700  |
| H | -6.22569000 | 3.10187600  | 0.58651300  |
| H | -5.81771200 | 1.37142500  | -0.68997300 |
| O | -5.56926300 | 1.00510500  | 1.73605100  |
| H | -1.32905600 | 3.46831800  | 0.09307900  |
| H | -1.55204500 | 2.50476200  | -1.37208800 |
| C | -2.29125200 | 1.54763200  | 1.90205200  |
| H | -1.48222300 | 0.85025300  | 2.12115900  |
| H | -2.01227500 | 2.51556300  | 2.33172600  |
| H | -3.19279300 | 1.19596300  | 2.40638100  |
| C | -1.89181600 | -1.89617700 | 1.36511900  |
| C | -3.02618600 | -1.69839300 | 2.17532000  |
| C | -0.91816900 | -2.82750800 | 1.77314700  |
| C | -3.17322800 | -2.41295400 | 3.36670200  |
| H | -3.79803100 | -0.98668000 | 1.90714500  |
| C | -1.07515700 | -3.53888700 | 2.96370700  |
| H | -0.03574900 | -2.97772700 | 1.16430900  |
| C | -2.20128900 | -3.33332300 | 3.76315200  |
| H | -4.04986400 | -2.24500600 | 3.98177500  |
| H | -0.31581200 | -4.25191100 | 3.26466500  |
| H | -2.32080400 | -3.88525800 | 4.68847200  |
| C | -2.59412400 | -2.26490900 | -1.36444400 |
| C | -3.93361900 | -2.59100500 | -1.07568000 |
| C | -1.98106300 | -2.85237200 | -2.48179200 |
| C | -4.64341000 | -3.46598000 | -1.89738900 |
| H | -4.41882300 | -2.18959000 | -0.19345700 |
| C | -2.69630200 | -3.73004400 | -3.30176600 |
| H | -0.94444200 | -2.62829700 | -2.69599600 |
| C | -4.02723600 | -4.03405500 | -3.01612900 |
| H | -5.67208700 | -3.71157600 | -1.65885900 |
| H | -2.20779500 | -4.17566200 | -4.16094500 |
| H | -4.57975100 | -4.71568900 | -3.65269100 |
| C | 0.95371400  | 2.33976600  | 1.48123000  |
| C | 1.12518400  | 3.70969400  | 1.75222000  |
| C | 1.20940100  | 1.40629300  | 2.50090300  |
| C | 1.52372100  | 4.13529800  | 3.01970000  |
| H | 0.96757400  | 4.44090400  | 0.96694900  |
| C | 1.60980100  | 1.83859700  | 3.76874900  |
| H | 1.10407700  | 0.34746500  | 2.29594900  |
| C | 1.76330100  | 3.20047200  | 4.03153600  |

|    |             |             |             |
|----|-------------|-------------|-------------|
| H  | 1.65399600  | 5.19360000  | 3.21644800  |
| H  | 1.80131500  | 1.10887300  | 4.54759400  |
| H  | 2.07422500  | 3.53361500  | 5.01513300  |
| C  | 1.28881400  | 2.90046900  | -1.29281400 |
| C  | 0.76569400  | 4.10831600  | -1.78770300 |
| C  | 2.59765600  | 2.53208300  | -1.66437000 |
| C  | 1.53120200  | 4.92708600  | -2.62305500 |
| H  | -0.24038600 | 4.41919800  | -1.53605100 |
| C  | 3.35855400  | 3.35529700  | -2.49521200 |
| H  | 3.00677300  | 1.58913900  | -1.31827800 |
| C  | 2.82861400  | 4.55498100  | -2.97639900 |
| H  | 1.11000500  | 5.85308200  | -2.99848500 |
| H  | 4.36183900  | 3.05318000  | -2.77388200 |
| H  | 3.41892300  | 5.18998200  | -3.62685100 |
| Cl | -0.27832000 | 0.08642400  | -3.26967000 |
| C  | 2.76091300  | -1.10849900 | 0.26859700  |
| O  | 2.76108700  | -0.61784600 | -0.90061100 |
| O  | 1.62480200  | -1.28540300 | 0.83341400  |
| C  | 4.03633300  | -1.44951900 | 0.99842200  |
| H  | 3.78375200  | -2.11306700 | 1.83164700  |
| H  | 4.41545000  | -0.51687400 | 1.44064500  |
| H  | 0.89041000  | 0.07472300  | -2.41688400 |
| H  | 0.63929600  | -2.14024100 | -1.34639600 |
| C  | 5.11066600  | -2.06884400 | 0.09251900  |
| H  | 4.72374100  | -3.00125000 | -0.33865400 |
| H  | 5.29411500  | -1.39462500 | -0.75134700 |
| C  | 6.42181000  | -2.35055200 | 0.83535200  |
| H  | 6.22551200  | -3.01654200 | 1.68808200  |
| H  | 6.80591500  | -1.41392400 | 1.26521300  |
| C  | 7.50092200  | -2.97738000 | -0.05669800 |
| H  | 7.69581500  | -2.31202000 | -0.90858000 |
| H  | 7.11619600  | -3.91266100 | -0.48523900 |
| C  | 8.81146300  | -3.25605700 | 0.68606100  |
| H  | 8.65397900  | -3.94626300 | 1.52288400  |
| H  | 9.55988800  | -3.70301000 | 0.02353100  |
| H  | 9.23897400  | -2.33376700 | 1.09604000  |

4\_hex

Zero-point = -3159.405261

|    |             |             |             |
|----|-------------|-------------|-------------|
| Ru | -0.15245200 | -0.58267400 | 1.11780300  |
| P  | -0.71265200 | 1.43104000  | -0.08361000 |
| P  | 1.97494200  | -0.68985200 | 0.36832800  |
| C  | 2.72677300  | 0.86351700  | -0.36759500 |
| H  | 2.98280000  | 1.47761300  | 0.50511200  |
| H  | 3.67347700  | 0.57104700  | -0.82668100 |
| C  | 0.73793800  | 2.45880900  | -0.67056900 |
| C  | 1.91906200  | 1.73205400  | -1.37345700 |
| C  | 2.84733500  | 2.88224100  | -1.88186000 |



|   |             |             |             |
|---|-------------|-------------|-------------|
| H | 2.35576400  | 3.39384600  | -2.71795400 |
| H | 3.00463300  | 3.63567900  | -1.09567400 |
| P | 4.54051700  | 2.42664700  | -2.44093800 |
| H | 4.95121100  | 3.63669100  | -3.06425500 |
| H | 5.29468000  | 2.48173500  | -1.23841000 |
| O | 4.72292700  | 1.17558800  | -3.25163300 |
| H | 0.35873800  | 3.24346800  | -1.33624000 |
| H | 1.13153700  | 2.95180800  | 0.22678700  |
| C | 1.43512500  | 0.93085400  | -2.59789300 |
| H | 0.82417700  | 0.07647600  | -2.30155800 |
| H | 0.82413200  | 1.56652900  | -3.24758100 |
| H | 2.28073600  | 0.55831400  | -3.17880700 |
| C | 2.32022600  | -2.01142800 | -0.88062900 |
| C | 3.25150800  | -1.89185800 | -1.92905500 |
| C | 1.64627900  | -3.23606600 | -0.71028800 |
| C | 3.49787500  | -2.97196100 | -2.78121100 |
| H | 3.78306400  | -0.96673300 | -2.11763600 |
| C | 1.90287900  | -4.31183400 | -1.56124000 |
| H | 0.91076200  | -3.32879700 | 0.07902600  |
| C | 2.82886700  | -4.18314700 | -2.59867700 |
| H | 4.21310600  | -2.85859900 | -3.58803300 |
| H | 1.37447800  | -5.24742600 | -1.41532000 |
| H | 3.02452600  | -5.01821100 | -3.26187200 |
| C | 3.32251400  | -1.06959600 | 1.59808100  |
| C | 4.68139800  | -1.04746500 | 1.22889100  |
| C | 2.99332500  | -1.40670300 | 2.92053800  |
| C | 5.67801000  | -1.32468100 | 2.16444200  |
| H | 4.96741200  | -0.84401800 | 0.20351500  |
| C | 3.99388900  | -1.68602300 | 3.85629300  |
| H | 1.94902700  | -1.48225600 | 3.19937900  |
| C | 5.33701400  | -1.63785000 | 3.48351900  |
| H | 6.71914200  | -1.30717200 | 1.86194200  |
| H | 3.71945300  | -1.94790800 | 4.87216100  |
| H | 6.11306200  | -1.85513900 | 4.20855200  |
| C | -1.84453800 | 1.47414700  | -1.55097700 |
| C | -2.47530300 | 2.65759900  | -1.97635800 |
| C | -2.06448600 | 0.28795700  | -2.27367100 |
| C | -3.29455700 | 2.65661400  | -3.10592900 |
| H | -2.34091900 | 3.57588100  | -1.41531800 |
| C | -2.88664300 | 0.29300700  | -3.40465300 |
| H | -1.60055400 | -0.63332600 | -1.94117500 |
| C | -3.49960900 | 1.47476100  | -3.82387100 |
| H | -3.77682100 | 3.57473100  | -3.42259700 |
| H | -3.04608200 | -0.62766000 | -3.95486200 |
| H | -4.13768600 | 1.47607700  | -4.70022400 |
| C | -1.55816900 | 2.66532400  | 1.02544200  |
| C | -1.24934500 | 4.03528700  | 1.09698300  |
| C | -2.54562100 | 2.15431800  | 1.90089200  |

|    |             |             |             |
|----|-------------|-------------|-------------|
| C  | -1.90476000 | 4.87027100  | 2.00780000  |
| H  | -0.49656700 | 4.46291700  | 0.44642900  |
| C  | -3.19547400 | 2.99487600  | 2.81032400  |
| H  | -2.80254900 | 1.09947600  | 1.85276800  |
| C  | -2.87527600 | 4.35395400  | 2.86753400  |
| H  | -1.65237400 | 5.92415500  | 2.04582800  |
| H  | -3.95082200 | 2.58446500  | 3.47123900  |
| H  | -3.37655300 | 5.00307300  | 3.57586100  |
| Cl | 0.29070600  | 0.79531900  | 3.22736600  |
| C  | -2.25422300 | -1.87828500 | 0.51453600  |
| O  | -2.30918600 | -1.08074500 | 1.50001900  |
| O  | -1.16490800 | -1.94456300 | -0.15635600 |
| C  | -3.42904100 | -2.74907200 | 0.13519700  |
| H  | -3.21310200 | -3.21389900 | -0.83187500 |
| H  | -3.48603700 | -3.55831700 | 0.87660100  |
| H  | -0.75078100 | 1.57543600  | 3.10702500  |
| H  | 0.20318600  | -1.89548700 | 2.00192200  |
| C  | -4.76261200 | -1.98644000 | 0.10298600  |
| H  | -4.91213800 | -1.49859400 | 1.07287200  |
| H  | -4.69865500 | -1.18379300 | -0.64360100 |
| C  | -5.95863900 | -2.89095300 | -0.21603100 |
| H  | -6.01585900 | -3.69594100 | 0.53103600  |
| H  | -5.79626200 | -3.38746200 | -1.18369200 |
| C  | -7.29540600 | -2.13936000 | -0.25242300 |
| H  | -7.45627800 | -1.64333500 | 0.71440400  |
| H  | -7.23730500 | -1.33553200 | -0.99883700 |
| C  | -8.49001200 | -3.04528000 | -0.56757100 |
| H  | -8.59464200 | -3.83829800 | 0.18183400  |
| H  | -9.42794600 | -2.48040700 | -0.58636000 |
| H  | -8.37388900 | -3.52917000 | -1.54424200 |

**S10. Cartesian coordinates (Å) and zero-point corrected energies, (Hartrees) of optimized structures of stationary points for the methanol formation in presence of acetate anion.**

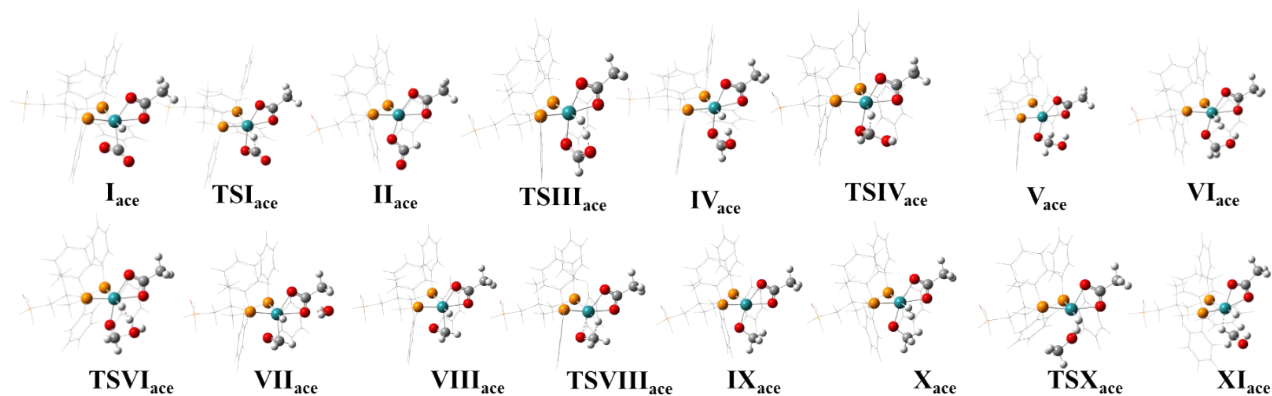

Ru-H<sub>ace</sub>

Zero-point = -2541.448112

|    |             |             |             |
|----|-------------|-------------|-------------|
| Ru | 0.32857000  | -1.16685600 | 1.10116600  |
| P  | 1.76001100  | 0.00546800  | -0.44284000 |
| P  | -1.60950800 | -0.50528500 | 0.15794200  |
| C  | -1.55739600 | 0.36375800  | -1.50514200 |
| H  | -1.46387200 | -0.45042100 | -2.23426000 |
| H  | -2.54980400 | 0.79529400  | -1.66029300 |
| C  | 0.93429300  | 0.73947900  | -1.96020100 |
| C  | -0.45544800 | 1.42196200  | -1.79155300 |
| C  | -0.74642400 | 2.08106500  | -3.17777300 |
| H  | -0.07925200 | 2.94113900  | -3.31018900 |
| H  | -0.52923300 | 1.38106100  | -3.99826500 |
| P  | -2.46128000 | 2.66583700  | -3.49984100 |
| H  | -2.26853500 | 3.42160700  | -4.68830600 |
| H  | -3.09577300 | 1.50820400  | -4.02415100 |
| O  | -3.20852700 | 3.35818700  | -2.39594800 |
| H  | 1.63120600  | 1.45462100  | -2.41261200 |
| H  | 0.81624700  | -0.09055100 | -2.66695900 |
| C  | -0.41727500 | 2.53497000  | -0.72614200 |
| H  | -0.27761700 | 2.12200000  | 0.27496500  |
| H  | 0.41309600  | 3.22140200  | -0.92240400 |
| H  | -1.34557200 | 3.10953700  | -0.73060900 |
| C  | -2.69197200 | 0.55176700  | 1.21506600  |
| C  | -3.46268600 | 1.62993800  | 0.74202800  |
| C  | -2.76589600 | 0.21134500  | 2.58017900  |
| C  | -4.29174400 | 2.34038700  | 1.61600500  |
| H  | -3.42104600 | 1.95351100  | -0.29117000 |
| C  | -3.60039100 | 0.92114600  | 3.44308500  |
| H  | -2.15363400 | -0.60079200 | 2.95428700  |
| C  | -4.36631000 | 1.98671200  | 2.96344800  |
| H  | -4.87265100 | 3.17281100  | 1.23556600  |
| H  | -3.64636700 | 0.64563800  | 4.49075200  |
| H  | -5.01069600 | 2.54082700  | 3.63655400  |
| C  | -2.76298100 | -1.86738400 | -0.33554900 |
| C  | -2.26710900 | -3.17946200 | -0.40566900 |
| C  | -4.10006600 | -1.62487600 | -0.69482000 |
| C  | -3.08234800 | -4.22514000 | -0.84547300 |
| H  | -1.25080200 | -3.38428100 | -0.08086900 |
| C  | -4.91459600 | -2.67210100 | -1.12880500 |
| H  | -4.51005900 | -0.62429800 | -0.61107000 |
| C  | -4.40593900 | -3.97156700 | -1.21074600 |
| H  | -2.68865600 | -5.23440500 | -0.88922800 |
| H  | -5.94706600 | -2.47600200 | -1.39544900 |
| H  | -5.04190100 | -4.78308000 | -1.54543100 |
| C  | 2.89561000  | 1.37888300  | 0.07276100  |
| C  | 4.08377000  | 1.66954500  | -0.62163100 |
| C  | 2.54770500  | 2.16804400  | 1.18417400  |

|   |             |             |             |
|---|-------------|-------------|-------------|
| C | 4.89461500  | 2.73337000  | -0.22256700 |
| H | 4.38404200  | 1.05326900  | -1.46144600 |
| C | 3.36245100  | 3.23338100  | 1.57785100  |
| H | 1.64837400  | 1.93762700  | 1.74305600  |
| C | 4.53429100  | 3.51943800  | 0.87526600  |
| H | 5.80979000  | 2.94466600  | -0.76439600 |
| H | 3.08062100  | 3.83600000  | 2.43425800  |
| H | 5.16675800  | 4.34393400  | 1.18393700  |
| C | 2.95370700  | -1.17895800 | -1.21963500 |
| C | 3.32036800  | -1.17841600 | -2.57779400 |
| C | 3.51839000  | -2.15198500 | -0.36827100 |
| C | 4.22225400  | -2.12504100 | -3.07174700 |
| H | 2.90959400  | -0.44176600 | -3.25783600 |
| C | 4.42234600  | -3.09171200 | -0.86685200 |
| H | 3.24594000  | -2.16454200 | 0.68242400  |
| C | 4.77387800  | -3.08288900 | -2.21886400 |
| H | 4.49349400  | -2.11205400 | -4.12156200 |
| H | 4.84692100  | -3.83257500 | -0.19875200 |
| H | 5.47129900  | -3.81716900 | -2.60523400 |
| C | 1.53202200  | -0.48431300 | 3.20749000  |
| O | 1.97167300  | -1.49333200 | 2.58472200  |
| O | 0.52079400  | 0.13716500  | 2.71297900  |
| C | 2.17911700  | 0.02633800  | 4.46572900  |
| H | 2.95898300  | 0.74759700  | 4.19670200  |
| H | 1.44536700  | 0.53052600  | 5.09783500  |
| H | 2.64533000  | -0.79960300 | 5.00605400  |
| H | -0.59889800 | -2.08065600 | 2.07681200  |

lace

Zero-point = - 2730.036774

|    |             |             |             |
|----|-------------|-------------|-------------|
| Ru | 0.28083400  | -1.40346700 | 0.62971900  |
| P  | 1.79790500  | 0.31203800  | -0.40683100 |
| P  | -1.66638600 | -0.35589200 | 0.03963200  |
| C  | -1.55553400 | 0.80347400  | -1.42239900 |
| H  | -1.44385100 | 0.14030400  | -2.28774600 |
| H  | -2.54773000 | 1.25481400  | -1.50652700 |
| C  | 0.94907300  | 1.30034400  | -1.75046400 |
| C  | -0.46072700 | 1.90583100  | -1.49035000 |
| C  | -0.74825300 | 2.78989700  | -2.74771300 |
| H  | -0.09514800 | 3.67006400  | -2.71954800 |
| H  | -0.50859600 | 2.24505300  | -3.67273100 |
| P  | -2.47100200 | 3.39728300  | -2.98654300 |
| H  | -2.27338100 | 4.36468900  | -4.00878800 |
| H  | -3.07481400 | 2.34728300  | -3.72771100 |
| O  | -3.24488800 | 3.85730100  | -1.78444700 |
| H  | 1.62451700  | 2.11360900  | -2.03999400 |
| H  | 0.88102300  | 0.61409400  | -2.60296900 |
| C  | -0.45826900 | 2.82252400  | -0.25220700 |

|   |             |             |             |
|---|-------------|-------------|-------------|
| H | -0.28798900 | 2.25988400  | 0.66714500  |
| H | 0.34259800  | 3.56491000  | -0.33501800 |
| H | -1.40947200 | 3.34916600  | -0.15589700 |
| C | -2.49702300 | 0.61081800  | 1.36824100  |
| C | -3.37723800 | 1.67756100  | 1.09830300  |
| C | -2.28473000 | 0.22379700  | 2.70443600  |
| C | -4.02168700 | 2.33921400  | 2.14487100  |
| H | -3.55745200 | 2.02177300  | 0.08701100  |
| C | -2.93940500 | 0.88811400  | 3.74499300  |
| H | -1.59571300 | -0.58100900 | 2.92437300  |
| C | -3.80714700 | 1.94537300  | 3.46825400  |
| H | -4.68764900 | 3.16445900  | 1.92118600  |
| H | -2.76573300 | 0.57837500  | 4.76936600  |
| H | -4.31109600 | 2.46251600  | 4.27679600  |
| C | -3.03284100 | -1.43974700 | -0.57628800 |
| C | -2.83908800 | -2.21295800 | -1.73860700 |
| C | -4.25877300 | -1.53360400 | 0.10319100  |
| C | -3.85158200 | -3.05086400 | -2.20659600 |
| H | -1.88922200 | -2.18536500 | -2.25907800 |
| C | -5.26686900 | -2.37683500 | -0.37044700 |
| H | -4.42692300 | -0.94971900 | 0.99873200  |
| C | -5.06796500 | -3.13458900 | -1.52495400 |
| H | -3.68441000 | -3.64592600 | -3.09719700 |
| H | -6.20681500 | -2.43911700 | 0.16599900  |
| H | -5.85115600 | -3.78977000 | -1.88826600 |
| C | 2.66499700  | 1.60205500  | 0.59082400  |
| C | 3.73020900  | 2.35395700  | 0.06238200  |
| C | 2.24068300  | 1.85263600  | 1.90803700  |
| C | 4.34218700  | 3.34662400  | 0.82814500  |
| H | 4.09582900  | 2.14727600  | -0.93727900 |
| C | 2.85782800  | 2.84886700  | 2.67009100  |
| H | 1.44045300  | 1.26017100  | 2.33622800  |
| C | 3.90436100  | 3.59885200  | 2.13173300  |
| H | 5.16417400  | 3.91775600  | 0.41154100  |
| H | 2.51965500  | 3.03496200  | 3.68333800  |
| H | 4.38255100  | 4.37000100  | 2.72468100  |
| C | 3.18880100  | -0.44294300 | -1.35798200 |
| C | 3.63542400  | 0.03664600  | -2.60325500 |
| C | 3.83747600  | -1.55623200 | -0.78974400 |
| C | 4.70784900  | -0.57531800 | -3.25687700 |
| H | 3.15160800  | 0.88216800  | -3.07644400 |
| C | 4.90962000  | -2.16138500 | -1.44754700 |
| H | 3.48936500  | -1.95515400 | 0.15605500  |
| C | 5.34793400  | -1.67354700 | -2.68030100 |
| H | 5.03872200  | -0.19508100 | -4.21686200 |
| H | 5.39286200  | -3.02207200 | -0.99949900 |
| H | 6.17645500  | -2.14979300 | -3.19164300 |
| C | 1.66652900  | -1.62327000 | 2.75777400  |

|   |             |             |             |
|---|-------------|-------------|-------------|
| O | 2.00915600  | -2.30640200 | 1.75092700  |
| O | 0.64209700  | -0.85576200 | 2.64778300  |
| C | 2.44212600  | -1.65677400 | 4.04605100  |
| H | 3.07580800  | -0.76476600 | 4.10453900  |
| H | 1.75963900  | -1.64078000 | 4.89911100  |
| H | 3.07463600  | -2.54461400 | 4.08278700  |
| H | -0.74414300 | -2.39551200 | 1.34770100  |
| C | 0.13003600  | -3.18825900 | -0.45806800 |
| O | 0.30828200  | -2.33222000 | -1.35587500 |
| O | 0.03021800  | -4.35980500 | -0.25289500 |

TSIace

Zero-point = -2730.032798

|    |             |             |             |
|----|-------------|-------------|-------------|
| Ru | 0.32891400  | -1.28963800 | 0.65928500  |
| P  | 1.74156200  | 0.31782000  | -0.43282300 |
| P  | -1.62854000 | -0.31293500 | -0.00505800 |
| C  | -1.56525600 | 0.92452700  | -1.40442600 |
| H  | -1.47528400 | 0.31226700  | -2.30934000 |
| H  | -2.55956600 | 1.37698100  | -1.44096600 |
| C  | 0.92319600  | 1.39765900  | -1.72548100 |
| C  | -0.46810100 | 2.02146800  | -1.42618100 |
| C  | -0.75027900 | 2.97609100  | -2.63056700 |
| H  | -0.08963100 | 3.84793700  | -2.55621700 |
| H  | -0.51924000 | 2.48186600  | -3.58575800 |
| P  | -2.46990900 | 3.60631100  | -2.82564800 |
| H  | -2.27424700 | 4.62218500  | -3.80009400 |
| H  | -3.08592000 | 2.59789300  | -3.61319800 |
| O  | -3.23129300 | 4.01042000  | -1.59582400 |
| H  | 1.62685700  | 2.20079400  | -1.97240200 |
| H  | 0.82735200  | 0.76308000  | -2.61424500 |
| C  | -0.44907900 | 2.86573500  | -0.13775100 |
| H  | -0.29660500 | 2.24467800  | 0.74670900  |
| H  | 0.36667700  | 3.59528100  | -0.17456400 |
| H  | -1.38989500 | 3.40539600  | -0.01377100 |
| C  | -2.54991300 | 0.54024300  | 1.34721200  |
| C  | -3.41244900 | 1.63259700  | 1.13035900  |
| C  | -2.41884300 | 0.02906500  | 2.65253500  |
| C  | -4.12090200 | 2.19383700  | 2.19512000  |
| H  | -3.53265900 | 2.07642500  | 0.14964700  |
| C  | -3.13689000 | 0.59094900  | 3.71021500  |
| H  | -1.73958600 | -0.79304600 | 2.83668800  |
| C  | -3.98854300 | 1.67361700  | 3.48443900  |
| H  | -4.77227800 | 3.04033800  | 2.01115900  |
| H  | -3.02372000 | 0.18449600  | 4.70888600  |
| H  | -4.54165900 | 2.11259100  | 4.30692800  |
| C  | -2.92473900 | -1.42568300 | -0.71822600 |
| C  | -2.61512400 | -2.19462600 | -1.85817200 |
| C  | -4.20732600 | -1.53386300 | -0.15581900 |

|   |             |             |             |
|---|-------------|-------------|-------------|
| C | -3.57024800 | -3.04204500 | -2.42019300 |
| H | -1.61922400 | -2.15805700 | -2.28360200 |
| C | -5.15797400 | -2.38694500 | -0.72248300 |
| H | -4.46390200 | -0.95298100 | 0.72057400  |
| C | -4.84395700 | -3.13994100 | -1.85431000 |
| H | -3.31479100 | -3.63389000 | -3.29182200 |
| H | -6.14319500 | -2.46063900 | -0.27627500 |
| H | -5.58261700 | -3.80309500 | -2.28941700 |
| C | 2.77983100  | 1.53587200  | 0.50058700  |
| C | 3.96222900  | 2.06578300  | -0.04850100 |
| C | 2.36957700  | 1.96747200  | 1.77510300  |
| C | 4.70460500  | 3.01616000  | 0.65370100  |
| H | 4.31271700  | 1.72042900  | -1.01424000 |
| C | 3.11780200  | 2.91980600  | 2.47302500  |
| H | 1.48041600  | 1.54310500  | 2.22498300  |
| C | 4.28250700  | 3.44790400  | 1.91395800  |
| H | 5.61549700  | 3.41359300  | 0.22030900  |
| H | 2.78889200  | 3.24468700  | 3.45388700  |
| H | 4.86236800  | 4.18454500  | 2.45811700  |
| C | 3.01145500  | -0.55139400 | -1.45656900 |
| C | 3.42198100  | -0.11070000 | -2.72870800 |
| C | 3.60433200  | -1.71076500 | -0.91945300 |
| C | 4.39851600  | -0.81004600 | -3.44252200 |
| H | 2.98813500  | 0.77649700  | -3.17326100 |
| C | 4.58028100  | -2.40354900 | -1.63778200 |
| H | 3.29495000  | -2.06938500 | 0.05500600  |
| C | 4.97891200  | -1.95735700 | -2.89939100 |
| H | 4.70258900  | -0.45776600 | -4.42184700 |
| H | 5.02093500  | -3.29773300 | -1.21196700 |
| H | 5.73268100  | -2.50118400 | -3.45691800 |
| C | 1.68015300  | -1.26611600 | 2.81961300  |
| O | 2.04017200  | -2.03908300 | 1.87898400  |
| O | 0.65917400  | -0.51693400 | 2.63148900  |
| C | 2.45016100  | -1.18790600 | 4.10942200  |
| H | 3.16262200  | -0.35779200 | 4.04490300  |
| H | 1.77490400  | -0.99185800 | 4.94515900  |
| H | 3.00455400  | -2.11291000 | 4.27516600  |
| H | -0.67807400 | -2.44756500 | 1.27807400  |
| C | -0.04957800 | -3.42894300 | 0.13108700  |
| O | 0.25711000  | -2.81054500 | -0.90696800 |
| O | -0.19978300 | -4.52192100 | 0.58595100  |

llace

Zero-point = -2730.054588

|    |             |             |             |
|----|-------------|-------------|-------------|
| Ru | 0.52627200  | -1.22631200 | 0.68342000  |
| P  | 1.54031300  | 0.40732900  | -0.40399300 |
| P  | -1.52011600 | -0.36670300 | 0.23690000  |
| C  | -1.74372700 | 0.25643100  | -1.49788800 |

|   |             |             |             |
|---|-------------|-------------|-------------|
| H | -1.64583100 | -0.65345500 | -2.09993600 |
| H | -2.77469200 | 0.60875500  | -1.59754100 |
| C | 0.71329900  | 0.82449200  | -2.02198000 |
| C | -0.75868700 | 1.32952600  | -2.04121400 |
| C | -1.08969800 | 1.55396400  | -3.55130300 |
| H | -0.52855300 | 2.42131800  | -3.91884200 |
| H | -0.77594200 | 0.68898800  | -4.15336500 |
| P | -2.85917300 | 1.82440600  | -3.98426000 |
| H | -2.74196300 | 2.21113200  | -5.34703100 |
| H | -3.35486800 | 0.50164500  | -4.12340000 |
| O | -3.68048300 | 2.72752800  | -3.10963300 |
| H | 1.35035200  | 1.55269100  | -2.53670300 |
| H | 0.76353700  | -0.11369800 | -2.58218600 |
| C | -0.90579300 | 2.68313600  | -1.31703400 |
| H | -0.72029200 | 2.60046700  | -0.24584100 |
| H | -0.18457900 | 3.40389100  | -1.71687700 |
| H | -1.90932500 | 3.08792400  | -1.46488400 |
| C | -2.24120800 | 0.90576100  | 1.35354500  |
| C | -3.26472500 | 1.78430100  | 0.95108600  |
| C | -1.79557200 | 0.94215900  | 2.68804400  |
| C | -3.81732900 | 2.68630100  | 1.86217800  |
| H | -3.63184500 | 1.78155800  | -0.06846300 |
| C | -2.35888700 | 1.84263500  | 3.59565700  |
| H | -1.01057700 | 0.26711500  | 3.01006300  |
| C | -3.36676900 | 2.71690500  | 3.18444900  |
| H | -4.59880300 | 3.36315200  | 1.53680200  |
| H | -2.00926800 | 1.85863900  | 4.62202400  |
| H | -3.80031400 | 3.41767600  | 3.88869900  |
| C | -2.79298100 | -1.70844900 | 0.30750000  |
| C | -2.62927600 | -2.84878700 | -0.50700300 |
| C | -3.89876000 | -1.64203700 | 1.17362300  |
| C | -3.56085000 | -3.88677100 | -0.45830900 |
| H | -1.76497100 | -2.92545800 | -1.15657900 |
| C | -4.82272900 | -2.68858100 | 1.21822000  |
| H | -4.04078300 | -0.77568600 | 1.80655300  |
| C | -4.65782600 | -3.81016100 | 0.40355800  |
| H | -3.42253100 | -4.75703700 | -1.08989800 |
| H | -5.67174100 | -2.62381000 | 1.88928700  |
| H | -5.37706000 | -4.62022500 | 0.44191900  |
| C | 1.87499100  | 2.02310800  | 0.40788300  |
| C | 2.50915000  | 3.06158400  | -0.30264500 |
| C | 1.49542200  | 2.23813600  | 1.74137100  |
| C | 2.73649700  | 4.29455800  | 0.30634100  |
| H | 2.83820700  | 2.90089500  | -1.32350500 |
| C | 1.72634300  | 3.47803100  | 2.34643200  |
| H | 1.03530500  | 1.43413900  | 2.30064600  |
| C | 2.33955600  | 4.50638800  | 1.63113400  |
| H | 3.22367700  | 5.08827500  | -0.24843000 |



|   |            |             |             |
|---|------------|-------------|-------------|
| H | 1.42389300 | 3.63541800  | 3.37544100  |
| H | 2.51400000 | 5.46743900  | 2.10096200  |
| C | 3.21917000 | -0.11459900 | -0.96135500 |
| C | 3.37022100 | -1.02046500 | -2.02861000 |
| C | 4.36455400 | 0.30869500  | -0.26228300 |
| C | 4.63808900 | -1.47599300 | -2.39279500 |
| H | 2.50656000 | -1.39732300 | -2.56139200 |
| C | 5.62872000 | -0.15485400 | -0.62952900 |
| H | 4.26827500 | 1.00303100  | 0.56359500  |
| C | 5.76894900 | -1.04518600 | -1.69593100 |
| H | 4.73628300 | -2.17724100 | -3.21332400 |
| H | 6.50227600 | 0.18007700  | -0.08177300 |
| H | 6.75133800 | -1.40573800 | -1.97800100 |
| C | 1.92827400 | -1.65679600 | 2.76883200  |
| O | 2.20572600 | -2.26792400 | 1.69053200  |
| O | 0.97865400 | -0.79359100 | 2.76131600  |
| C | 2.71223400 | -1.90744500 | 4.02932000  |
| H | 3.54769100 | -1.19963600 | 4.07379500  |
| H | 2.08447200 | -1.74955200 | 4.90844300  |
| H | 3.12182700 | -2.91885600 | 4.02447500  |
| H | 1.65865400 | -3.61836000 | -0.51063000 |
| C | 1.03725400 | -3.29609100 | -1.37254300 |
| O | 0.34865000 | -2.19349800 | -1.16251300 |
| O | 1.01231100 | -3.92692200 | -2.41680500 |

Ilace at T=160°C

Zero-point = -2730.054587

|    |             |             |             |
|----|-------------|-------------|-------------|
| Ru | -0.52622700 | -1.22658900 | -0.68281700 |
| P  | -1.54032600 | 0.40752000  | 0.40385000  |
| P  | 1.52013200  | -0.36677400 | -0.23658300 |
| C  | 1.74373500  | 0.25728900  | 1.49785900  |
| H  | 1.64596800  | -0.65231900 | 2.10034900  |
| H  | 2.77466200  | 0.60979200  | 1.59728200  |
| C  | -0.71334300 | 0.82536900  | 2.02168000  |
| C  | 0.75858300  | 1.33056200  | 2.04067200  |
| C  | 1.08951600  | 1.55578900  | 3.55065600  |
| H  | 0.52823100  | 2.42323000  | 3.91777100  |
| H  | 0.77585800  | 0.69104200  | 4.15309800  |
| P  | 2.85895000  | 1.82667400  | 3.98356500  |
| H  | 2.74161700  | 2.21440400  | 5.34603700  |
| H  | 3.35472200  | 0.50405300  | 4.12372700  |
| O  | 3.68028600  | 2.72919800  | 3.10834600  |
| H  | -1.35047500 | 1.55365100  | 2.53619800  |
| H  | -0.76339800 | -0.11265800 | 2.58216300  |
| C  | 0.90556400  | 2.68381300  | 1.31581700  |
| H  | 0.72029200  | 2.60052100  | 0.24463000  |
| H  | 0.18412200  | 3.40463600  | 1.71512300  |
| H  | 1.90898100  | 3.08888300  | 1.46366600  |

|   |             |             |             |
|---|-------------|-------------|-------------|
| C | 2.24118500  | 0.90507700  | -1.35391100 |
| C | 3.26450800  | 1.78401500  | -0.95186300 |
| C | 1.79568100  | 0.94057800  | -2.68848100 |
| C | 3.81707100  | 2.68554100  | -1.86344600 |
| H | 3.63152500  | 1.78192400  | 0.06772900  |
| C | 2.35896000  | 1.84058000  | -3.59657700 |
| H | 1.01083400  | 0.26520300  | -3.01017900 |
| C | 3.36664800  | 2.71526900  | -3.18578300 |
| H | 4.59840600  | 3.36270900  | -1.53839700 |
| H | 2.00945900  | 1.85589700  | -4.62299400 |
| H | 3.80016100  | 3.41567500  | -3.89041300 |
| C | 2.79303500  | -1.70852400 | -0.30659800 |
| C | 2.62938100  | -2.84857800 | 0.50831100  |
| C | 3.89889600  | -1.64230900 | -1.17262900 |
| C | 3.56106200  | -3.88648500 | 0.46005800  |
| H | 1.76505200  | -2.92508100 | 1.15786800  |
| C | 4.82296800  | -2.68877900 | -1.21678300 |
| H | 4.04091000  | -0.77616000 | -1.80584100 |
| C | 4.65809200  | -3.81009100 | -0.40175500 |
| H | 3.42278100  | -4.75652800 | 1.09196300  |
| H | 5.67203600  | -2.62415600 | -1.88779500 |
| H | 5.37740300  | -4.62010200 | -0.43976900 |
| C | -1.87512700 | 2.02298200  | -0.40856000 |
| C | -2.51004600 | 3.06134800  | 0.30144600  |
| C | -1.49484500 | 2.23793800  | -1.74185300 |
| C | -2.73748900 | 4.29413900  | -0.30786600 |
| H | -2.83960200 | 2.90069900  | 1.32215400  |
| C | -1.72587800 | 3.47765100  | -2.34724900 |
| H | -1.03409400 | 1.43404000  | -2.30073000 |
| C | -2.33987400 | 4.50589700  | -1.63246800 |
| H | -3.22525900 | 5.08777400  | 0.24649800  |
| H | -1.42289000 | 3.63498300  | -3.37610600 |
| H | -2.51440500 | 5.46680300  | -2.10255400 |
| C | -3.21920900 | -0.11427900 | 0.96128400  |
| C | -3.37031000 | -1.01982000 | 2.02881100  |
| C | -4.36455200 | 0.30868500  | 0.26193300  |
| C | -4.63817500 | -1.47539100 | 2.39295500  |
| H | -2.50668700 | -1.39645400 | 2.56181300  |
| C | -5.62870900 | -0.15488300 | 0.62916100  |
| H | -4.26823000 | 1.00282100  | -0.56411400 |
| C | -5.76898200 | -1.04491300 | 1.69581700  |
| H | -4.73640300 | -2.17640400 | 3.21368000  |
| H | -6.50223900 | 0.17980900  | 0.08122000  |
| H | -6.75137500 | -1.40546200 | 1.97787500  |
| C | -1.92791500 | -1.65800200 | -2.76818000 |
| O | -2.20535900 | -2.26895700 | -1.68976000 |
| O | -0.97852800 | -0.79454700 | -2.76083900 |
| C | -2.71170000 | -1.90920500 | -4.02865300 |

|   |             |             |             |
|---|-------------|-------------|-------------|
| H | -3.54809600 | -1.20248400 | -4.07274100 |
| H | -2.08425100 | -1.75023400 | -4.90780200 |
| H | -3.12001000 | -2.92113900 | -4.02407900 |
| H | -1.65835000 | -3.61823200 | 0.51138100  |
| C | -1.03707800 | -3.29595500 | 1.37337600  |
| O | -0.34847400 | -2.19332000 | 1.16327500  |
| O | -1.01224100 | -3.92666900 | 2.41768800  |

Illace

Zero-point = -2731.233745

|    |             |             |             |
|----|-------------|-------------|-------------|
| Ru | 0.45678200  | -1.38865000 | 0.57563800  |
| P  | 1.60849000  | 0.33890700  | -0.43878100 |
| P  | -1.54672700 | -0.35702400 | 0.23078500  |
| C  | -1.71448400 | 0.47358600  | -1.43137500 |
| H  | -1.69626800 | -0.36943500 | -2.13084700 |
| H  | -2.72057900 | 0.90205800  | -1.47037400 |
| C  | 0.75980300  | 0.94234200  | -1.98661500 |
| C  | -0.67767900 | 1.53177200  | -1.89869200 |
| C  | -1.03891200 | 1.93063400  | -3.36603100 |
| H  | -0.43331600 | 2.79529200  | -3.66253600 |
| H  | -0.79710900 | 1.11611500  | -4.06449400 |
| P  | -2.79683800 | 2.35274700  | -3.71579900 |
| H  | -2.68697700 | 2.85492100  | -5.04142800 |
| H  | -3.38218200 | 1.08253500  | -3.96142000 |
| O  | -3.53719000 | 3.22127900  | -2.74049500 |
| H  | 1.41912100  | 1.67416400  | -2.46626600 |
| H  | 0.73711500  | 0.05604300  | -2.62842500 |
| C  | -0.72396800 | 2.81170100  | -1.03965900 |
| H  | -0.51946400 | 2.61011800  | 0.01171500  |
| H  | 0.02961700  | 3.52644700  | -1.38636400 |
| H  | -1.70498300 | 3.28567000  | -1.11616200 |
| C  | -2.11763200 | 0.87643200  | 1.47404900  |
| C  | -3.09411100 | 1.85007300  | 1.18771400  |
| C  | -1.60511300 | 0.78849700  | 2.78096300  |
| C  | -3.53363100 | 2.72180300  | 2.18491900  |
| H  | -3.51187400 | 1.94271600  | 0.19201800  |
| C  | -2.05639700 | 1.65978900  | 3.77648900  |
| H  | -0.85256000 | 0.04376900  | 3.01230900  |
| C  | -3.01694400 | 2.62794600  | 3.48034500  |
| H  | -4.27898200 | 3.47238200  | 1.94853800  |
| H  | -1.65558900 | 1.57896700  | 4.78087800  |
| H  | -3.36327100 | 3.30570500  | 4.25222900  |
| C  | -3.00837900 | -1.49008400 | 0.13439600  |
| C  | -3.01836900 | -2.50387500 | -0.84340000 |
| C  | -4.08999600 | -1.39936600 | 1.02617600  |
| C  | -4.08682900 | -3.39588800 | -0.92920200 |
| H  | -2.17919700 | -2.60524600 | -1.52009900 |
| C  | -5.15580100 | -2.29903600 | 0.93796900  |

|   |             |             |             |
|---|-------------|-------------|-------------|
| H | -4.10306400 | -0.62786500 | 1.78498600  |
| C | -5.15861300 | -3.29591400 | -0.03820000 |
| H | -4.07602100 | -4.17466000 | -1.68326300 |
| H | -5.98296300 | -2.21723300 | 1.63397900  |
| H | -5.98595300 | -3.99312500 | -0.10232800 |
| C | 2.06160600  | 1.87739700  | 0.46424300  |
| C | 2.70432400  | 2.94116100  | -0.20075600 |
| C | 1.75206600  | 2.01426600  | 1.82641100  |
| C | 3.01110100  | 4.11823600  | 0.47989000  |
| H | 2.97689700  | 2.84343500  | -1.24580200 |
| C | 2.06124300  | 3.19864800  | 2.50365100  |
| H | 1.28525000  | 1.19107400  | 2.35100900  |
| C | 2.68424800  | 4.25104300  | 1.83367600  |
| H | 3.50417900  | 4.93031300  | -0.04226900 |
| H | 1.81102200  | 3.29420800  | 3.55414100  |
| H | 2.91934200  | 5.16904500  | 2.35986200  |
| C | 3.23225000  | -0.21920100 | -1.12070900 |
| C | 3.25549700  | -1.18714900 | -2.14318200 |
| C | 4.45209400  | 0.24241800  | -0.59748000 |
| C | 4.46965900  | -1.65931300 | -2.64137100 |
| H | 2.32501100  | -1.59680000 | -2.51539300 |
| C | 5.66423700  | -0.24025900 | -1.09644900 |
| H | 4.45787300  | 0.97886600  | 0.19590000  |
| C | 5.67709300  | -1.18647700 | -2.12174100 |
| H | 4.47177000  | -2.40677200 | -3.42680600 |
| H | 6.59676500  | 0.12447100  | -0.68072200 |
| H | 6.61900500  | -1.55955700 | -2.50699400 |
| C | 2.12706700  | -1.73542500 | 2.48411400  |
| O | 2.34746100  | -2.27301700 | 1.36148400  |
| O | 1.09891000  | -0.97495700 | 2.61086000  |
| C | 3.01710100  | -1.99904400 | 3.67022000  |
| H | 3.11331900  | -1.09957400 | 4.28275200  |
| H | 2.56475800  | -2.78160700 | 4.28936700  |
| H | 3.99736100  | -2.34278500 | 3.33698500  |
| H | 0.37672400  | -3.79808300 | -2.57117000 |
| C | 0.30529300  | -3.46866200 | -1.51425500 |
| O | 0.30933700  | -2.17308500 | -1.40150200 |
| O | 0.21732200  | -4.30061600 | -0.61402600 |
| H | -0.18950500 | -3.11822700 | 0.88397100  |
| H | -0.47122800 | -2.67133300 | 1.49413500  |

TSIIIace

Zero-point = -2731.22774

|    |             |             |             |
|----|-------------|-------------|-------------|
| Ru | 0.40060500  | -1.38489400 | 0.56307600  |
| P  | 1.67202000  | 0.32484500  | -0.42636800 |
| P  | -1.56472800 | -0.32636600 | 0.15541800  |
| C  | -1.64430900 | 0.68227000  | -1.41873400 |
| H  | -1.61484300 | -0.06332800 | -2.22090200 |

|   |             |             |             |
|---|-------------|-------------|-------------|
| H | -2.63982100 | 1.13434000  | -1.44727200 |
| C | 0.84270900  | 1.13443400  | -1.89594900 |
| C | -0.56961700 | 1.76260400  | -1.71570300 |
| C | -0.90467000 | 2.40404600  | -3.10106500 |
| H | -0.26895500 | 3.28483400  | -3.25036700 |
| H | -0.67970500 | 1.70648300  | -3.92164200 |
| P | -2.64374300 | 2.93161200  | -3.39554600 |
| H | -2.49780700 | 3.64074200  | -4.61956500 |
| H | -3.25870600 | 1.73680300  | -3.85641100 |
| O | -3.38002500 | 3.64901800  | -2.30193000 |
| H | 1.52502900  | 1.89431100  | -2.29282000 |
| H | 0.77612600  | 0.34466400  | -2.65238500 |
| C | -0.56982900 | 2.88825900  | -0.66234800 |
| H | -0.37161200 | 2.50949100  | 0.34043200  |
| H | 0.20927900  | 3.62225600  | -0.89308900 |
| H | -1.53467000 | 3.39997900  | -0.65044700 |
| C | -2.24318900 | 0.78678900  | 1.46087100  |
| C | -3.24543200 | 1.74203500  | 1.20232300  |
| C | -1.76887800 | 0.63470200  | 2.77612700  |
| C | -3.74983200 | 2.53136200  | 2.23633900  |
| H | -3.63077400 | 1.89082000  | 0.20049900  |
| C | -2.28528000 | 1.42423500  | 3.80817700  |
| H | -0.99373900 | -0.09301300 | 2.98349000  |
| C | -3.27246200 | 2.37338000  | 3.54073600  |
| H | -4.51305200 | 3.27022500  | 2.02082600  |
| H | -1.91250000 | 1.29495400  | 4.81832000  |
| H | -3.66851500 | 2.98829500  | 4.34092300  |
| C | -3.01321100 | -1.44215000 | -0.16044500 |
| C | -3.08465200 | -2.19283100 | -1.34976400 |
| C | -4.01916700 | -1.61749400 | 0.80496700  |
| C | -4.13645200 | -3.08343200 | -1.56838500 |
| H | -2.30871000 | -2.09730200 | -2.10050900 |
| C | -5.06676000 | -2.51451000 | 0.58459000  |
| H | -3.98457500 | -1.05163700 | 1.72737700  |
| C | -5.13091200 | -3.24717800 | -0.60149200 |
| H | -4.17638500 | -3.65251400 | -2.49062100 |
| H | -5.83369400 | -2.63698400 | 1.34100500  |
| H | -5.94598000 | -3.94116500 | -0.77074800 |
| C | 2.30594900  | 1.77474300  | 0.52560000  |
| C | 3.07546300  | 2.77726400  | -0.09757400 |
| C | 1.98694700  | 1.91102100  | 1.88636400  |
| C | 3.50121400  | 3.89348500  | 0.62139900  |
| H | 3.35484700  | 2.67645800  | -1.14074100 |
| C | 2.41669900  | 3.03313300  | 2.60280000  |
| H | 1.41507300  | 1.13445800  | 2.37878000  |
| C | 3.16798100  | 4.02549300  | 1.97356600  |
| H | 4.09229200  | 4.65836900  | 0.13034600  |
| H | 2.15997000  | 3.12832200  | 3.65190700  |

|   |             |             |             |
|---|-------------|-------------|-------------|
| H | 3.49668200  | 4.89574000  | 2.53004000  |
| C | 3.21586200  | -0.31416000 | -1.22343900 |
| C | 3.12812400  | -1.13154000 | -2.36666900 |
| C | 4.48150900  | -0.08998500 | -0.65383800 |
| C | 4.27633100  | -1.68386400 | -2.93523600 |
| H | 2.15997700  | -1.36683400 | -2.79118800 |
| C | 5.62675100  | -0.65219900 | -1.22208900 |
| H | 4.57331500  | 0.52578200  | 0.23205900  |
| C | 5.52950500  | -1.44455100 | -2.36662000 |
| H | 4.19077300  | -2.30884000 | -3.81735900 |
| H | 6.59405900  | -0.46950900 | -0.76770000 |
| H | 6.41978300  | -1.87818000 | -2.80724300 |
| C | 1.95625400  | -1.79631700 | 2.54039000  |
| O | 2.20666000  | -2.35203900 | 1.43119500  |
| O | 0.96820600  | -0.98179400 | 2.60974900  |
| C | 2.76697100  | -2.10140300 | 3.77270400  |
| H | 2.23578800  | -2.84792100 | 4.37360100  |
| H | 3.74064700  | -2.50728400 | 3.49413600  |
| H | 2.88709300  | -1.20306000 | 4.38277900  |
| H | 0.13669500  | -4.11595600 | -2.29776800 |
| C | 0.08292500  | -3.56160500 | -1.35194200 |
| O | 0.29106300  | -2.31833500 | -1.38634900 |
| O | -0.19469400 | -4.23388200 | -0.31035000 |
| H | -0.29507300 | -3.39970500 | 0.55988300  |
| H | -0.48711800 | -2.66006800 | 1.29197300  |

IVace

Zero-point = -2731.226816

|    |             |             |             |
|----|-------------|-------------|-------------|
| Ru | 0.31030000  | -1.25907300 | 0.71049500  |
| P  | 1.72969900  | 0.31438200  | -0.39220200 |
| P  | -1.61443400 | -0.28428100 | 0.02882300  |
| C  | -1.55973300 | 0.88555300  | -1.43110000 |
| H  | -1.46393000 | 0.24024700  | -2.31111300 |
| H  | -2.55110900 | 1.34135100  | -1.49305900 |
| C  | 0.93640200  | 1.33713000  | -1.74709600 |
| C  | -0.45911900 | 1.97656000  | -1.49781500 |
| C  | -0.72409300 | 2.86729100  | -2.75411200 |
| H  | -0.06786500 | 3.74479500  | -2.71395300 |
| H  | -0.47435600 | 2.32568000  | -3.67873000 |
| P  | -2.43999100 | 3.47892700  | -3.01952600 |
| H  | -2.22640600 | 4.42121600  | -4.06274100 |
| H  | -3.04148200 | 2.41605100  | -3.74520100 |
| O  | -3.22665300 | 3.97149000  | -1.83934200 |
| H  | 1.64270000  | 2.12888900  | -2.02264500 |
| H  | 0.85080100  | 0.66243200  | -2.60758700 |
| C  | -0.46209700 | 2.88820500  | -0.25596300 |
| H  | -0.31454100 | 2.31676900  | 0.66175200  |
| H  | 0.34794700  | 3.62216400  | -0.32105100 |

|   |             |             |             |
|---|-------------|-------------|-------------|
| H | -1.40994800 | 3.42437100  | -0.17363400 |
| C | -2.56689000 | 0.63198000  | 1.32045200  |
| C | -3.47836200 | 1.66582500  | 1.03121600  |
| C | -2.39595100 | 0.23399100  | 2.65990000  |
| C | -4.19673400 | 2.28105000  | 2.05842300  |
| H | -3.62677300 | 2.02422800  | 0.02003300  |
| C | -3.12488700 | 0.84863200  | 3.68103300  |
| H | -1.67614200 | -0.53957600 | 2.89427500  |
| C | -4.02587500 | 1.87218800  | 3.38319200  |
| H | -4.88519300 | 3.08320900  | 1.81873700  |
| H | -2.98050800 | 0.53019700  | 4.70744500  |
| H | -4.58672600 | 2.35306100  | 4.17664700  |
| C | -2.90414900 | -1.44949100 | -0.62802000 |
| C | -2.69196200 | -2.11341100 | -1.85256000 |
| C | -4.07026900 | -1.74076000 | 0.09913000  |
| C | -3.62364900 | -3.03355700 | -2.33556100 |
| H | -1.78935500 | -1.92569600 | -2.42343400 |
| C | -4.99723800 | -2.66701800 | -0.38521400 |
| H | -4.25369300 | -1.24258800 | 1.04268000  |
| C | -4.77932500 | -3.31381200 | -1.60245100 |
| H | -3.44641900 | -3.53254800 | -3.28212200 |
| H | -5.89174500 | -2.87856400 | 0.18971300  |
| H | -5.50166800 | -4.02979500 | -1.97703000 |
| C | 2.67360400  | 1.60684500  | 0.54511600  |
| C | 3.79269700  | 2.25071900  | -0.01511400 |
| C | 2.24672700  | 1.98311000  | 1.83067200  |
| C | 4.45550400  | 3.25788500  | 0.68694900  |
| H | 4.15776200  | 1.95031500  | -0.99088900 |
| C | 2.91484800  | 2.99309900  | 2.52924000  |
| H | 1.40691300  | 1.47179500  | 2.28515700  |
| C | 4.01557400  | 3.63402400  | 1.95939600  |
| H | 5.31816200  | 3.74389000  | 0.24486900  |
| H | 2.57380100  | 3.27451400  | 3.51944400  |
| H | 4.53308300  | 4.41578200  | 2.50371400  |
| C | 3.10323800  | -0.49589200 | -1.33625300 |
| C | 3.51509100  | -0.11513400 | -2.62575800 |
| C | 3.77412800  | -1.56038000 | -0.70147200 |
| C | 4.56957900  | -0.77729800 | -3.26198100 |
| H | 3.02123800  | 0.69619000  | -3.14605200 |
| C | 4.82896500  | -2.21419300 | -1.33954400 |
| H | 3.45619900  | -1.87856700 | 0.28533500  |
| C | 5.22937300  | -1.82626200 | -2.62084600 |
| H | 4.87327200  | -0.47081600 | -4.25691700 |
| H | 5.33383900  | -3.03136900 | -0.83629600 |
| H | 6.04649300  | -2.33865700 | -3.11569200 |
| C | 1.61165000  | -1.36313800 | 2.90439400  |
| O | 1.98217100  | -2.10031700 | 1.93958000  |
| O | 0.64066400  | -0.55293900 | 2.71872400  |

|   |             |             |             |
|---|-------------|-------------|-------------|
| C | 2.26748300  | -1.45976000 | 4.25694000  |
| H | 2.24903700  | -0.49089300 | 4.76008200  |
| H | 1.71222000  | -2.17560000 | 4.87360100  |
| H | 3.29372700  | -1.81740200 | 4.15601900  |
| H | 0.36409300  | -4.34641500 | -1.83020300 |
| C | 0.20314200  | -3.67975300 | -0.97772800 |
| O | 0.43575100  | -2.46382600 | -1.08758100 |
| O | -0.23045600 | -4.26344800 | 0.09411200  |
| H | -0.66401600 | -2.38795700 | 1.47601400  |
| H | -0.38956200 | -3.48994800 | 0.78589900  |

TSIVace

Zero-point = -2731.196094

|    |             |             |             |
|----|-------------|-------------|-------------|
| Ru | 0.39630500  | -1.44119000 | 0.41472100  |
| P  | 1.65197200  | 0.38200700  | -0.40142500 |
| P  | -1.56011300 | -0.32955100 | 0.15598200  |
| C  | -1.67754400 | 0.70490900  | -1.39647800 |
| H  | -1.65455500 | -0.03254500 | -2.20586000 |
| H  | -2.67426100 | 1.15647200  | -1.40000600 |
| C  | 0.81008000  | 1.18550900  | -1.86536300 |
| C  | -0.61250500 | 1.79387300  | -1.69769300 |
| C  | -0.94959800 | 2.41478600  | -3.09176600 |
| H  | -0.32090200 | 3.29888800  | -3.25147300 |
| H  | -0.71578000 | 1.70743600  | -3.90128000 |
| P  | -2.69001500 | 2.92638200  | -3.40055900 |
| H  | -2.54613100 | 3.59397600  | -4.64812800 |
| H  | -3.30297900 | 1.71561700  | -3.82052900 |
| O  | -3.42634700 | 3.67943800  | -2.33143300 |
| H  | 1.48156800  | 1.94861000  | -2.27476200 |
| H  | 0.76713000  | 0.38044700  | -2.60874000 |
| C  | -0.63749200 | 2.92812200  | -0.65393700 |
| H  | -0.41768300 | 2.56435200  | 0.35026100  |
| H  | 0.11450500  | 3.68545100  | -0.89794200 |
| H  | -1.61737400 | 3.41066600  | -0.63823800 |
| C  | -2.14372400 | 0.77300500  | 1.51173400  |
| C  | -3.18926900 | 1.69882700  | 1.32788600  |
| C  | -1.55092200 | 0.65354700  | 2.78073600  |
| C  | -3.61936100 | 2.49507100  | 2.38905400  |
| H  | -3.66691800 | 1.81165500  | 0.36150300  |
| C  | -1.99277600 | 1.45112200  | 3.84138600  |
| H  | -0.74819700 | -0.05827900 | 2.93063000  |
| C  | -3.02202500 | 2.37271100  | 3.64754200  |
| H  | -4.41774100 | 3.21116300  | 2.23205600  |
| H  | -1.52914400 | 1.34939400  | 4.81643300  |
| H  | -3.35943700 | 2.99363800  | 4.46964800  |
| C  | -3.05110000 | -1.40486400 | -0.10284600 |
| C  | -3.23499300 | -2.09605600 | -1.31769000 |
| C  | -3.97655800 | -1.61449400 | 0.93521000  |



|   |             |             |             |
|---|-------------|-------------|-------------|
| C | -4.32118400 | -2.95747300 | -1.48844000 |
| H | -2.51601500 | -1.98289700 | -2.12059700 |
| C | -5.05689000 | -2.48197400 | 0.76086600  |
| H | -3.85516800 | -1.09388600 | 1.87700200  |
| C | -5.23537600 | -3.15226100 | -0.45092500 |
| H | -4.44907000 | -3.47794800 | -2.43116900 |
| H | -5.76170200 | -2.62815300 | 1.57162000  |
| H | -6.07792600 | -3.82068200 | -0.58544900 |
| C | 2.23517500  | 1.80345700  | 0.62062100  |
| C | 2.79518000  | 2.96333500  | 0.04861900  |
| C | 2.11836700  | 1.72800100  | 2.01909500  |
| C | 3.22013600  | 4.01905800  | 0.85532100  |
| H | 2.90516100  | 3.04289400  | -1.02702900 |
| C | 2.54516200  | 2.78979500  | 2.82287300  |
| H | 1.69379900  | 0.83790600  | 2.46804200  |
| C | 3.09344800  | 3.93492400  | 2.24524100  |
| H | 3.64722600  | 4.90628300  | 0.40149600  |
| H | 2.44424400  | 2.71968800  | 3.90017900  |
| H | 3.42022400  | 4.75820500  | 2.87004500  |
| C | 3.20108500  | -0.21360300 | -1.22042200 |
| C | 3.10364600  | -1.36317300 | -2.03080400 |
| C | 4.45392000  | 0.39924100  | -1.05654700 |
| C | 4.23222200  | -1.86196100 | -2.68150300 |
| H | 2.15566600  | -1.88476900 | -2.11674900 |
| C | 5.58083200  | -0.11184500 | -1.70654000 |
| H | 4.55541900  | 1.26674500  | -0.41742800 |
| C | 5.47216100  | -1.23698000 | -2.52449900 |
| H | 4.14408900  | -2.75087500 | -3.29611100 |
| H | 6.54271200  | 0.36916300  | -1.56749200 |
| H | 6.34866600  | -1.63231000 | -3.02530000 |
| C | 2.01902000  | -2.00951400 | 2.32059900  |
| O | 1.01976000  | -1.22086800 | 2.48435600  |
| O | 2.22422500  | -2.50199000 | 1.17550800  |
| C | 2.93579100  | -2.30116400 | 3.48181500  |
| H | 2.35159900  | -2.51021100 | 4.38189700  |
| H | 3.58736800  | -3.14403800 | 3.24803800  |
| H | 3.55437300  | -1.41971600 | 3.68368500  |
| C | -0.29907600 | -3.31782000 | -0.70273600 |
| O | 0.59433100  | -4.36195300 | -0.67583000 |
| O | 0.01639000  | -2.34534400 | -1.49738400 |
| H | -1.35230900 | -3.62717900 | -0.66739300 |
| H | 0.32860500  | -4.98759600 | 0.01296600  |
| H | -0.42599900 | -2.85871500 | 0.80429500  |

Vace

Zero-point = -2731.211841

|    |            |             |             |
|----|------------|-------------|-------------|
| Ru | 0.51695100 | -1.32010100 | 0.38936100  |
| P  | 1.54526000 | 0.50440600  | -0.41631800 |

|   |             |             |             |
|---|-------------|-------------|-------------|
| P | -1.52827200 | -0.38456000 | 0.15589700  |
| C | -1.77644800 | 0.63448300  | -1.38570400 |
| H | -1.72939100 | -0.10489100 | -2.19276100 |
| H | -2.80176900 | 1.01571200  | -1.35987200 |
| C | 0.66225400  | 1.26835800  | -1.87353400 |
| C | -0.79305500 | 1.78930900  | -1.71013800 |
| C | -1.17909600 | 2.36952200  | -3.10816100 |
| H | -0.61178500 | 3.29125100  | -3.28411500 |
| H | -0.90712800 | 1.66881100  | -3.91128900 |
| P | -2.95436900 | 2.76028400  | -3.39905400 |
| H | -2.87235800 | 3.42962700  | -4.65089800 |
| H | -3.48875500 | 1.50818300  | -3.80345900 |
| O | -3.72367900 | 3.46749300  | -2.32162900 |
| H | 1.29358800  | 2.07432700  | -2.26437000 |
| H | 0.67446000  | 0.47038500  | -2.62529900 |
| C | -0.88413600 | 2.93228600  | -0.67917900 |
| H | -0.64473200 | 2.59454100  | 0.32960000  |
| H | -0.17716700 | 3.72903600  | -0.93257100 |
| H | -1.89006400 | 3.35792900  | -0.67065800 |
| C | -2.18144100 | 0.64256500  | 1.53910200  |
| C | -3.26124800 | 1.53272200  | 1.38238500  |
| C | -1.60336600 | 0.48749300  | 2.81187100  |
| C | -3.73931300 | 2.25923900  | 2.47336800  |
| H | -3.72921600 | 1.67351300  | 0.41503800  |
| C | -2.09322400 | 1.21303800  | 3.90191200  |
| H | -0.77373600 | -0.19771000 | 2.94323600  |
| C | -3.15692500 | 2.10064300  | 3.73437000  |
| H | -4.56441300 | 2.94877800  | 2.33712300  |
| H | -1.64108700 | 1.08259700  | 4.87887400  |
| H | -3.53226800 | 2.66654800  | 4.57934900  |
| C | -2.89600800 | -1.61165500 | -0.08435100 |
| C | -2.92672900 | -2.39567400 | -1.25615400 |
| C | -3.88570600 | -1.81497200 | 0.89224700  |
| C | -3.93264200 | -3.34416400 | -1.44547200 |
| H | -2.14084700 | -2.28720500 | -1.99501200 |
| C | -4.88508000 | -2.77222300 | 0.69888200  |
| H | -3.88059800 | -1.22249500 | 1.79834300  |
| C | -4.91454900 | -3.53452900 | -0.46960300 |
| H | -3.94422500 | -3.93947500 | -2.35173300 |
| H | -5.64191100 | -2.91663100 | 1.46155700  |
| H | -5.69300800 | -4.27395500 | -0.61803900 |
| C | 2.02105000  | 1.93752000  | 0.64187200  |
| C | 2.53851200  | 3.12771100  | 0.09237600  |
| C | 1.86914300  | 1.84321100  | 2.03489700  |
| C | 2.88200400  | 4.19816300  | 0.91780200  |
| H | 2.68205400  | 3.21747700  | -0.97857300 |
| C | 2.21426000  | 2.92031500  | 2.85751000  |
| H | 1.48946400  | 0.92528200  | 2.46642500  |

|   |             |             |             |
|---|-------------|-------------|-------------|
| C | 2.71628200  | 4.09746700  | 2.30274500  |
| H | 3.27723300  | 5.10915200  | 0.48276700  |
| H | 2.08729900  | 2.83587800  | 3.93090100  |
| H | 2.97947800  | 4.93242100  | 2.94182700  |
| C | 3.13704300  | 0.01882400  | -1.22030300 |
| C | 3.10174800  | -1.04924000 | -2.14037600 |
| C | 4.36633300  | 0.63335900  | -0.93252700 |
| C | 4.27267900  | -1.46836800 | -2.77232000 |
| H | 2.16887200  | -1.57686000 | -2.31762100 |
| C | 5.53492200  | 0.20226900  | -1.56674800 |
| H | 4.41540000  | 1.44225200  | -0.21487100 |
| C | 5.49039600  | -0.84286500 | -2.49019300 |
| H | 4.23455600  | -2.29451500 | -3.47361600 |
| H | 6.47855300  | 0.68316900  | -1.33428900 |
| H | 6.39910200  | -1.17566100 | -2.97879500 |
| C | 2.16673100  | -1.99161800 | 2.25692800  |
| O | 1.16502500  | -1.24195400 | 2.50798100  |
| O | 2.38177000  | -2.35313300 | 1.05407400  |
| C | 3.10429000  | -2.40992700 | 3.35957300  |
| H | 2.60874300  | -2.34912100 | 4.32980100  |
| H | 3.47002100  | -3.42284100 | 3.17876100  |
| H | 3.96941500  | -1.73740200 | 3.36432800  |
| C | 0.10669000  | -3.47134600 | -0.72270100 |
| O | 1.21021700  | -4.33074900 | -0.69415400 |
| O | 0.25220800  | -2.31341700 | -1.42140000 |
| H | -0.75731500 | -4.07154700 | -1.04247100 |
| H | 1.94984100  | -3.82926700 | -0.31191000 |
| H | -0.17799800 | -3.21222700 | 0.39331500  |

Vlacc

Zero-point = -2732.383916

|    |             |             |             |
|----|-------------|-------------|-------------|
| Ru | 0.49005600  | -1.30352400 | 0.62649500  |
| P  | 1.54102800  | 0.43753100  | -0.45421100 |
| P  | -1.55736500 | -0.40147500 | 0.25472800  |
| C  | -1.77765600 | 0.38052600  | -1.42247900 |
| H  | -1.70476000 | -0.47836400 | -2.09821900 |
| H  | -2.80839400 | 0.74539100  | -1.46643700 |
| C  | 0.65577900  | 0.96210500  | -2.00631000 |
| C  | -0.80547200 | 1.48587800  | -1.91429200 |
| C  | -1.19875300 | 1.84332400  | -3.38372200 |
| H  | -0.64264500 | 2.73440300  | -3.69858000 |
| H  | -0.91959000 | 1.03174200  | -4.07149600 |
| P  | -2.97917400 | 2.16448700  | -3.72364300 |
| H  | -2.90832900 | 2.64771600  | -5.05913900 |
| H  | -3.49816800 | 0.86086800  | -3.94126900 |
| O  | -3.75733900 | 3.01042400  | -2.75764800 |
| H  | 1.27798700  | 1.70839500  | -2.51257000 |
| H  | 0.66343500  | 0.05372300  | -2.61637400 |

|   |             |             |             |
|---|-------------|-------------|-------------|
| C | -0.90843600 | 2.77337600  | -1.07216900 |
| H | -0.68505100 | 2.59554300  | -0.02009200 |
| H | -0.19448800 | 3.52052400  | -1.43442600 |
| H | -1.91274600 | 3.19662200  | -1.14470300 |
| C | -2.20890100 | 0.81369200  | 1.47629900  |
| C | -3.24365500 | 1.72105600  | 1.17718900  |
| C | -1.68459000 | 0.78390100  | 2.78134900  |
| C | -3.73139900 | 2.58288900  | 2.16090200  |
| H | -3.66784700 | 1.77194600  | 0.18104100  |
| C | -2.18279700 | 1.64509800  | 3.76283000  |
| H | -0.88464100 | 0.09238900  | 3.02051900  |
| C | -3.20342500 | 2.54589400  | 3.45453600  |
| H | -4.52179400 | 3.28256800  | 1.91475000  |
| H | -1.77139900 | 1.61004400  | 4.76560600  |
| H | -3.58642800 | 3.21632800  | 4.21544400  |
| C | -2.93326000 | -1.63489600 | 0.16696800  |
| C | -2.80305800 | -2.69966200 | -0.74615800 |
| C | -4.07690200 | -1.56840600 | 0.97835700  |
| C | -3.80090100 | -3.66864700 | -0.84768800 |
| H | -1.90674500 | -2.76476100 | -1.35207400 |
| C | -5.07060000 | -2.54650200 | 0.87519100  |
| H | -4.19437600 | -0.75687300 | 1.68503900  |
| C | -4.93699800 | -3.59460400 | -0.03634400 |
| H | -3.68720100 | -4.48499800 | -1.55226200 |
| H | -5.94856900 | -2.48560800 | 1.50836800  |
| H | -5.70961200 | -4.35110600 | -0.11216000 |
| C | 1.95130500  | 2.01493300  | 0.40176600  |
| C | 2.54990500  | 3.08247100  | -0.29720100 |
| C | 1.64891500  | 2.17755600  | 1.76294400  |
| C | 2.82109100  | 4.28739000  | 0.34921600  |
| H | 2.81551200  | 2.96647400  | -1.34221600 |
| C | 1.92240000  | 3.38947100  | 2.40593600  |
| H | 1.21513200  | 1.35309100  | 2.31355000  |
| C | 2.50209900  | 4.44471100  | 1.70222700  |
| H | 3.28028200  | 5.10217700  | -0.19902700 |
| H | 1.67845200  | 3.50430800  | 3.45599600  |
| H | 2.70937800  | 5.38412400  | 2.20167500  |
| C | 3.17582600  | -0.08752700 | -1.13567500 |
| C | 3.21759500  | -1.07452000 | -2.13967000 |
| C | 4.38543600  | 0.41673500  | -0.62895600 |
| C | 4.44152700  | -1.52598000 | -2.63414000 |
| H | 2.29032100  | -1.50964600 | -2.49142800 |
| C | 5.60722600  | -0.04559300 | -1.12424300 |
| H | 4.37580500  | 1.17012100  | 0.14856200  |
| C | 5.63924600  | -1.01277400 | -2.12961100 |
| H | 4.45901500  | -2.28626400 | -3.40719800 |
| H | 6.53230700  | 0.35191700  | -0.72200400 |
| H | 6.58873900  | -1.36882200 | -2.51261600 |

|   |             |             |             |
|---|-------------|-------------|-------------|
| C | 2.22459800  | -1.53110700 | 2.52798900  |
| O | 1.16429100  | -0.82952600 | 2.66721200  |
| O | 2.46090200  | -2.07431500 | 1.40580100  |
| C | 3.15555200  | -1.73537200 | 3.69579200  |
| H | 2.84004100  | -2.62567900 | 4.25130400  |
| H | 4.17495600  | -1.89878200 | 3.34161100  |
| H | 3.11647900  | -0.87967800 | 4.37270400  |
| C | 0.63047100  | -3.46376900 | -1.47477900 |
| O | 1.25985600  | -4.09233400 | -0.35921200 |
| O | 0.39389200  | -2.10868800 | -1.33114300 |
| H | 1.24761100  | -3.61944300 | -2.38205100 |
| H | 2.04576400  | -3.57345800 | -0.12422200 |
| H | -0.29813300 | -4.05165900 | -1.59802200 |
| H | -0.43661500 | -2.59411200 | 1.57178900  |
| H | 0.00069800  | -3.03862700 | 1.07530800  |

TSVIace

Zero-point = -2732.362378

|    |             |             |             |
|----|-------------|-------------|-------------|
| Ru | 0.38199300  | -1.43553300 | 0.34133200  |
| P  | 1.67232500  | 0.40499800  | -0.37246200 |
| P  | -1.55059700 | -0.30558600 | 0.12561600  |
| C  | -1.63920300 | 0.84056800  | -1.34524800 |
| H  | -1.58910300 | 0.16395600  | -2.20638400 |
| H  | -2.63287200 | 1.29970500  | -1.33914500 |
| C  | 0.85375100  | 1.35798700  | -1.75768300 |
| C  | -0.56982000 | 1.94963700  | -1.54046600 |
| C  | -0.89166600 | 2.69500100  | -2.87641900 |
| H  | -0.25725600 | 3.58640700  | -2.94930200 |
| H  | -0.65043500 | 2.06228400  | -3.74375100 |
| P  | -2.62279000 | 3.24206800  | -3.16901900 |
| H  | -2.45532600 | 3.99497600  | -4.36429500 |
| H  | -3.23629200 | 2.06870400  | -3.68743800 |
| O  | -3.37410500 | 3.92072800  | -2.06227700 |
| H  | 1.52830400  | 2.15999400  | -2.07734500 |
| H  | 0.81081900  | 0.63663200  | -2.58172100 |
| C  | -0.60504200 | 2.98423500  | -0.39829300 |
| H  | -0.39650000 | 2.52922700  | 0.57038000  |
| H  | 0.14984300  | 3.75979900  | -0.56372900 |
| H  | -1.58570200 | 3.46346800  | -0.34820900 |
| C  | -2.18511100 | 0.68258100  | 1.54989200  |
| C  | -3.28690300 | 1.54957700  | 1.43060700  |
| C  | -1.57683800 | 0.51549800  | 2.80547900  |
| C  | -3.75439800 | 2.24999900  | 2.54210900  |
| H  | -3.78161500 | 1.68646600  | 0.47560500  |
| C  | -2.05662000 | 1.21455200  | 3.91767700  |
| H  | -0.73695100 | -0.16235200 | 2.90556900  |
| C  | -3.13968000 | 2.08426100  | 3.78732600  |
| H  | -4.59703000 | 2.92362400  | 2.43640600  |

|   |             |             |             |
|---|-------------|-------------|-------------|
| H | -1.58219200 | 1.07650700  | 4.88314900  |
| H | -3.50732400 | 2.62935600  | 4.64929600  |
| C | -3.04349100 | -1.36772500 | -0.19636000 |
| C | -3.78455500 | -1.36214000 | -1.38913900 |
| C | -3.42555700 | -2.26035000 | 0.82550500  |
| C | -4.87166000 | -2.22782400 | -1.55840000 |
| H | -3.53058000 | -0.68715000 | -2.19587500 |
| C | -4.51071000 | -3.11708700 | 0.65605100  |
| H | -2.85921900 | -2.28636500 | 1.74999500  |
| C | -5.23696300 | -3.10584400 | -0.53962600 |
| H | -5.43142700 | -2.20829200 | -2.48693000 |
| H | -4.78950700 | -3.79510400 | 1.45483400  |
| H | -6.07939400 | -3.77485000 | -0.67175100 |
| C | 2.24330300  | 1.73250900  | 0.77842700  |
| C | 2.87594600  | 2.90113700  | 0.30917200  |
| C | 2.03493300  | 1.58498200  | 2.15949800  |
| C | 3.27343800  | 3.89966700  | 1.19780500  |
| H | 3.06970000  | 3.02629900  | -0.75035800 |
| C | 2.43530200  | 2.58944500  | 3.04698800  |
| H | 1.56889700  | 0.68109000  | 2.53107400  |
| C | 3.04910800  | 3.74727500  | 2.56990800  |
| H | 3.75696300  | 4.79466500  | 0.82255700  |
| H | 2.26346600  | 2.46383800  | 4.11018900  |
| H | 3.35447000  | 4.52646900  | 3.25886300  |
| C | 3.25094200  | -0.08239100 | -1.21448000 |
| C | 3.17615100  | -0.96438700 | -2.31192100 |
| C | 4.51668500  | 0.33375500  | -0.76911800 |
| C | 4.33687100  | -1.38791600 | -2.95947700 |
| H | 2.21031900  | -1.34758200 | -2.62178900 |
| C | 5.67602800  | -0.10303900 | -1.41659600 |
| H | 4.59996400  | 0.99908200  | 0.08050700  |
| C | 5.59035800  | -0.95691000 | -2.51639500 |
| H | 4.26332000  | -2.06427400 | -3.80433900 |
| H | 6.64488900  | 0.22696500  | -1.05838900 |
| H | 6.49102700  | -1.29129900 | -3.01858500 |
| C | 1.99326500  | -2.27344700 | 2.15472000  |
| O | 1.06801700  | -1.43178500 | 2.41337500  |
| O | 2.16007600  | -2.65782400 | 0.95485700  |
| C | 2.84414400  | -2.82543100 | 3.27032400  |
| H | 2.32909000  | -3.68016800 | 3.72336300  |
| H | 3.80502300  | -3.16684000 | 2.88158300  |
| H | 2.99241900  | -2.07198500 | 4.04687900  |
| C | -0.34871300 | -3.16951300 | -1.91730100 |
| O | 0.16654000  | -4.27531400 | -0.74994200 |
| O | 0.25666600  | -2.03911800 | -1.72807400 |
| H | 1.13995300  | -4.19879900 | -0.73183600 |
| H | -1.41535100 | -3.24864800 | -1.66735100 |
| H | -0.11300200 | -3.61532100 | 0.09723800  |

H -0.51984500 -2.79142800 0.85311100

TSVlace at T=160°

Zero-point = -2732.362378

|    |             |             |             |
|----|-------------|-------------|-------------|
| Ru | 0.38199300  | -1.43553300 | 0.34133200  |
| P  | 1.67232500  | 0.40499800  | -0.37246200 |
| P  | -1.55059700 | -0.30558600 | 0.12561600  |
| C  | -1.63920300 | 0.84056800  | -1.34524800 |
| H  | -1.58910300 | 0.16395600  | -2.20638400 |
| H  | -2.63287200 | 1.29970500  | -1.33914500 |
| C  | 0.85375100  | 1.35798700  | -1.75768300 |
| C  | -0.56982000 | 1.94963700  | -1.54046600 |
| C  | -0.89166600 | 2.69500100  | -2.87641900 |
| H  | -0.25725600 | 3.58640700  | -2.94930200 |
| H  | -0.65043500 | 2.06228400  | -3.74375100 |
| P  | -2.62279000 | 3.24206800  | -3.16901900 |
| H  | -2.45532600 | 3.99497600  | -4.36429500 |
| H  | -3.23629200 | 2.06870400  | -3.68743800 |
| O  | -3.37410500 | 3.92072800  | -2.06227700 |
| H  | 1.52830400  | 2.15999400  | -2.07734500 |
| H  | 0.81081900  | 0.63663200  | -2.58172100 |
| C  | -0.60504200 | 2.98423500  | -0.39829300 |
| H  | -0.39650000 | 2.52922700  | 0.57038000  |
| H  | 0.14984300  | 3.75979900  | -0.56372900 |
| H  | -1.58570200 | 3.46346800  | -0.34820900 |
| C  | -2.18511100 | 0.68258100  | 1.54989200  |
| C  | -3.28690300 | 1.54957700  | 1.43060700  |
| C  | -1.57683800 | 0.51549800  | 2.80547900  |
| C  | -3.75439800 | 2.24999900  | 2.54210900  |
| H  | -3.78161500 | 1.68646600  | 0.47560500  |
| C  | -2.05662000 | 1.21455200  | 3.91767700  |
| H  | -0.73695100 | -0.16235200 | 2.90556900  |
| C  | -3.13968000 | 2.08426100  | 3.78732600  |
| H  | -4.59703000 | 2.92362400  | 2.43640600  |
| H  | -1.58219200 | 1.07650700  | 4.88314900  |
| H  | -3.50732400 | 2.62935600  | 4.64929600  |
| C  | -3.04349100 | -1.36772500 | -0.19636000 |
| C  | -3.78455500 | -1.36214000 | -1.38913900 |
| C  | -3.42555700 | -2.26035000 | 0.82550500  |
| C  | -4.87166000 | -2.22782400 | -1.55840000 |
| H  | -3.53058000 | -0.68715000 | -2.19587500 |
| C  | -4.51071000 | -3.11708700 | 0.65605100  |
| H  | -2.85921900 | -2.28636500 | 1.74999500  |
| C  | -5.23696300 | -3.10584400 | -0.53962600 |
| H  | -5.43142700 | -2.20829200 | -2.48693000 |
| H  | -4.78950700 | -3.79510400 | 1.45483400  |
| H  | -6.07939400 | -3.77485000 | -0.67175100 |
| C  | 2.24330300  | 1.73250900  | 0.77842700  |

|   |             |             |             |
|---|-------------|-------------|-------------|
| C | 2.87594600  | 2.90113700  | 0.30917200  |
| C | 2.03493300  | 1.58498200  | 2.15949800  |
| C | 3.27343800  | 3.89966700  | 1.19780500  |
| H | 3.06970000  | 3.02629900  | -0.75035800 |
| C | 2.43530200  | 2.58944500  | 3.04698800  |
| H | 1.56889700  | 0.68109000  | 2.53107400  |
| C | 3.04910800  | 3.74727500  | 2.56990800  |
| H | 3.75696300  | 4.79466500  | 0.82255700  |
| H | 2.26346600  | 2.46383800  | 4.11018900  |
| H | 3.35447000  | 4.52646900  | 3.25886300  |
| C | 3.25094200  | -0.08239100 | -1.21448000 |
| C | 3.17615100  | -0.96438700 | -2.31192100 |
| C | 4.51668500  | 0.33375500  | -0.76911800 |
| C | 4.33687100  | -1.38791600 | -2.95947700 |
| H | 2.21031900  | -1.34758200 | -2.62178900 |
| C | 5.67602800  | -0.10303900 | -1.41659600 |
| H | 4.59996400  | 0.99908200  | 0.08050700  |
| C | 5.59035800  | -0.95691000 | -2.51639500 |
| H | 4.26332000  | -2.06427400 | -3.80433900 |
| H | 6.64488900  | 0.22696600  | -1.05838900 |
| H | 6.49102700  | -1.29129800 | -3.01858500 |
| C | 1.99326500  | -2.27344700 | 2.15472000  |
| O | 1.06801700  | -1.43178500 | 2.41337500  |
| O | 2.16007600  | -2.65782400 | 0.95485700  |
| C | 2.84414400  | -2.82543100 | 3.27032400  |
| H | 2.32909000  | -3.68016800 | 3.72336300  |
| H | 3.80502300  | -3.16684000 | 2.88158300  |
| H | 2.99241900  | -2.07198500 | 4.04687900  |
| C | -0.34871300 | -3.16951300 | -1.91730100 |
| O | 0.16654000  | -4.27531400 | -0.74994200 |
| O | 0.25666600  | -2.03911800 | -1.72807400 |
| H | -0.08062800 | -3.71328800 | -2.83359300 |
| H | 1.13995300  | -4.19879900 | -0.73183600 |
| H | -1.41535100 | -3.24864800 | -1.66735100 |
| H | -0.11300200 | -3.61532100 | 0.09723800  |
| H | -0.51984500 | -2.79142800 | 0.85311100  |

Vllace

Zero-point = -2732.386666

|    |             |             |             |
|----|-------------|-------------|-------------|
| Ru | 0.35768300  | -1.50183700 | 0.33276500  |
| P  | 1.53460500  | 0.53084400  | -0.47161300 |
| P  | -1.69581600 | -0.54891900 | 0.12077600  |
| C  | -1.87040100 | 0.63083900  | -1.31967400 |
| H  | -1.79630200 | -0.01877500 | -2.19689200 |
| H  | -2.90019200 | 0.99712100  | -1.27671500 |
| C  | 0.55450000  | 1.37401800  | -1.81943500 |
| C  | -0.90394500 | 1.83185100  | -1.51449100 |
| C  | -1.35509000 | 2.59441900  | -2.80303400 |



|   |             |             |             |
|---|-------------|-------------|-------------|
| H | -0.80987900 | 3.54363400  | -2.86502600 |
| H | -1.10126400 | 2.02126500  | -3.70694000 |
| P | -3.14670200 | 2.98458000  | -2.97589600 |
| H | -3.11780200 | 3.86122000  | -4.09490200 |
| H | -3.66778400 | 1.80756500  | -3.57590100 |
| O | -3.89864600 | 3.47565300  | -1.77277600 |
| H | 1.13160900  | 2.23528600  | -2.17415700 |
| H | 0.53319800  | 0.64566700  | -2.63720500 |
| C | -0.96401500 | 2.82213900  | -0.33486900 |
| H | -0.68866400 | 2.35059300  | 0.60908600  |
| H | -0.26886700 | 3.65194000  | -0.49891500 |
| H | -1.97149800 | 3.23081200  | -0.23177400 |
| C | -2.37856600 | 0.34259500  | 1.57812000  |
| C | -3.44498400 | 1.25731100  | 1.47437300  |
| C | -1.83887800 | 0.06184900  | 2.84624500  |
| C | -3.94943900 | 1.88099700  | 2.61576400  |
| H | -3.87931400 | 1.50233300  | 0.51201700  |
| C | -2.35479900 | 0.68689600  | 3.98552400  |
| H | -1.01485600 | -0.63584900 | 2.93489100  |
| C | -3.40692200 | 1.59641700  | 3.87250700  |
| H | -4.76351700 | 2.59025800  | 2.52125300  |
| H | -1.93164800 | 0.46057000  | 4.95792200  |
| H | -3.80322500 | 2.08320900  | 4.75633400  |
| C | -3.07536400 | -1.70663500 | -0.30975600 |
| C | -3.10296800 | -2.32651500 | -1.57510000 |
| C | -4.07398400 | -2.03175000 | 0.62347000  |
| C | -4.11078000 | -3.23718200 | -1.89580400 |
| H | -2.32155700 | -2.11633200 | -2.29656500 |
| C | -5.07744900 | -2.94713100 | 0.29748200  |
| H | -4.07011500 | -1.56781100 | 1.60174500  |
| C | -5.10132400 | -3.54902600 | -0.96157300 |
| H | -4.11841100 | -3.70613000 | -2.87353000 |
| H | -5.84158300 | -3.18565600 | 1.02855900  |
| H | -5.88292100 | -4.25678000 | -1.21243500 |
| C | 2.04511900  | 1.91487300  | 0.63091100  |
| C | 2.61159500  | 3.09756800  | 0.11459800  |
| C | 1.84127000  | 1.80842900  | 2.01693500  |
| C | 2.95557900  | 4.14806800  | 0.96462900  |
| H | 2.79410100  | 3.19291300  | -0.95024100 |
| C | 2.18744100  | 2.86592200  | 2.86442200  |
| H | 1.41765100  | 0.89928500  | 2.42602200  |
| C | 2.74043000  | 4.03485900  | 2.34207400  |
| H | 3.39025300  | 5.05296500  | 0.55532600  |
| H | 2.02093000  | 2.77248400  | 3.93155200  |
| H | 3.00523500  | 4.85396100  | 3.00063900  |
| C | 3.09760700  | 0.11864400  | -1.36907600 |
| C | 3.03535300  | -0.78851600 | -2.44704800 |
| C | 4.35476600  | 0.59502500  | -0.95716100 |

|   |             |             |             |
|---|-------------|-------------|-------------|
| C | 4.19982600  | -1.18228700 | -3.10692800 |
| H | 2.08084500  | -1.22096300 | -2.72623300 |
| C | 5.51897200  | 0.18795400  | -1.61869400 |
| H | 4.42885300  | 1.27932500  | -0.12192900 |
| C | 5.44422900  | -0.69586400 | -2.69742500 |
| H | 4.13631800  | -1.88476200 | -3.93032500 |
| H | 6.48093100  | 0.56405300  | -1.28831700 |
| H | 6.34778400  | -1.01247100 | -3.20495100 |
| C | 2.11037100  | -1.95638800 | 2.14703300  |
| O | 1.04900100  | -1.26914100 | 2.35659600  |
| O | 2.29132000  | -2.42575400 | 0.98043700  |
| C | 3.10527100  | -2.20201800 | 3.24625100  |
| H | 2.93522200  | -3.20032100 | 3.66486300  |
| H | 4.11400900  | -2.17620600 | 2.82509500  |
| H | 2.98978600  | -1.46576000 | 4.04349400  |
| C | 0.06748600  | -3.03893300 | -1.07660000 |
| O | 0.14562500  | -1.91690400 | -1.75741600 |
| H | 0.95605300  | -3.68181900 | -1.02404200 |
| H | -0.89704000 | -3.55120700 | -1.03323600 |
| H | -0.41440300 | -2.71627200 | 1.03604300  |
| O | 5.13898700  | -2.42058900 | 0.60615700  |
| H | 5.21178100  | -1.65977600 | 0.01469600  |
| H | 4.19120200  | -2.63301900 | 0.57406100  |

#### Villace

Zero-point = -2655.976526

|    |             |             |             |
|----|-------------|-------------|-------------|
| Ru | 0.32165700  | -1.59724900 | 0.44994400  |
| P  | 1.74380600  | 0.24505500  | -0.42208000 |
| P  | -1.60983800 | -0.44271100 | 0.11880300  |
| C  | -1.61318100 | 0.67959800  | -1.37707200 |
| H  | -1.58148000 | -0.01480300 | -2.22208000 |
| H  | -2.59873200 | 1.15400200  | -1.38782000 |
| C  | 0.88993100  | 1.13420400  | -1.82720000 |
| C  | -0.51691500 | 1.75996800  | -1.58748500 |
| C  | -0.84602900 | 2.51061900  | -2.91921200 |
| H  | -0.19811600 | 3.39125300  | -3.00197300 |
| H  | -0.63159900 | 1.87432500  | -3.79055300 |
| P  | -2.57743400 | 3.08536200  | -3.16809100 |
| H  | -2.42021000 | 3.89654900  | -4.32544000 |
| H  | -3.20966200 | 1.94459600  | -3.73029200 |
| O  | -3.30450800 | 3.71620200  | -2.01589300 |
| H  | 1.56700300  | 1.91148000  | -2.19902100 |
| H  | 0.81113500  | 0.37866100  | -2.61632400 |
| C  | -0.50078300 | 2.80058600  | -0.45053700 |
| H  | -0.30199900 | 2.34278200  | 0.51909800  |
| H  | 0.28396000  | 3.54354100  | -0.62628800 |
| H  | -1.46044600 | 3.31882400  | -0.39366800 |
| C  | -2.24186000 | 0.58628500  | 1.50788200  |

|   |             |             |             |
|---|-------------|-------------|-------------|
| C | -3.20313600 | 1.59961900  | 1.32382500  |
| C | -1.77196200 | 0.31717100  | 2.80592300  |
| C | -3.67318500 | 2.32966300  | 2.41579700  |
| H | -3.58055800 | 1.83896700  | 0.33639500  |
| C | -2.25330700 | 1.04951000  | 3.89540700  |
| H | -1.02713900 | -0.45518400 | 2.95572300  |
| C | -3.20084500 | 2.05546900  | 3.70280700  |
| H | -4.40511000 | 3.11355700  | 2.25906500  |
| H | -1.88443900 | 0.83142400  | 4.89154900  |
| H | -3.56981000 | 2.62533400  | 4.54801800  |
| C | -3.09280000 | -1.46546300 | -0.31214700 |
| C | -3.13927200 | -2.14696100 | -1.54494100 |
| C | -4.15814200 | -1.62716700 | 0.58920500  |
| C | -4.22962600 | -2.95688100 | -1.86580400 |
| H | -2.31003500 | -2.06373500 | -2.23833400 |
| C | -5.24461700 | -2.44258800 | 0.26352600  |
| H | -4.14106000 | -1.11383300 | 1.54227100  |
| C | -5.28585300 | -3.10584200 | -0.96380500 |
| H | -4.25079700 | -3.47497500 | -2.81823800 |
| H | -6.05941200 | -2.55500600 | 0.96981300  |
| H | -6.13167900 | -3.73543100 | -1.21486300 |
| C | 2.37403400  | 1.61561800  | 0.63715800  |
| C | 3.06472800  | 2.71562200  | 0.09029100  |
| C | 2.13644800  | 1.58450000  | 2.02161800  |
| C | 3.49803100  | 3.75872600  | 0.90818300  |
| H | 3.27356600  | 2.75152200  | -0.97327600 |
| C | 2.57213000  | 2.63427500  | 2.83686700  |
| H | 1.61407800  | 0.73910600  | 2.45344000  |
| C | 3.24903300  | 3.72117200  | 2.28400000  |
| H | 4.02778900  | 4.59955400  | 0.47481100  |
| H | 2.37693900  | 2.60016800  | 3.90281000  |
| H | 3.58261200  | 4.53518200  | 2.91726700  |
| C | 3.26875100  | -0.35793900 | -1.27499500 |
| C | 3.12556100  | -1.30939900 | -2.30596200 |
| C | 4.56209200  | 0.03625900  | -0.89260700 |
| C | 4.24964200  | -1.82252700 | -2.95280500 |
| H | 2.13691900  | -1.67448900 | -2.56136500 |
| C | 5.68320800  | -0.48938100 | -1.54072300 |
| H | 4.69691900  | 0.75096100  | -0.09115100 |
| C | 5.53121300  | -1.41229400 | -2.57575000 |
| H | 4.12409500  | -2.55458500 | -3.74294400 |
| H | 6.67436000  | -0.17585900 | -1.23242600 |
| H | 6.40281700  | -1.81724100 | -3.07709800 |
| C | 1.93510400  | -2.16416400 | 2.34609700  |
| O | 0.95995200  | -1.33695400 | 2.48569800  |
| O | 2.12042900  | -2.69123100 | 1.21450900  |
| C | 2.81000000  | -2.48794900 | 3.52834200  |
| H | 2.23389200  | -3.06764800 | 4.25718400  |

|   |             |             |             |
|---|-------------|-------------|-------------|
| H | 3.67680100  | -3.06812300 | 3.21009100  |
| H | 3.13312100  | -1.56624600 | 4.02025500  |
| C | -0.08079400 | -3.16827900 | -0.89224600 |
| O | 0.12593000  | -2.09815700 | -1.62640200 |
| H | 0.73966200  | -3.88833500 | -0.77452700 |
| H | -1.09182500 | -3.58255600 | -0.85551800 |
| H | -0.60245900 | -2.68144400 | 1.18329600  |

TSVlllace

Zero-point = -2655.971654

|    |             |             |             |
|----|-------------|-------------|-------------|
| Ru | 0.39461000  | -1.57073700 | 0.34536000  |
| P  | 1.67516900  | 0.29571400  | -0.41135000 |
| P  | -1.56352300 | -0.43587300 | 0.12981300  |
| C  | -1.66331500 | 0.70043200  | -1.35131800 |
| H  | -1.65658100 | 0.01263500  | -2.20376000 |
| H  | -2.65552800 | 1.16062400  | -1.31998100 |
| C  | 0.82341300  | 1.18715900  | -1.81664800 |
| C  | -0.59052900 | 1.79625300  | -1.59167400 |
| C  | -0.93799800 | 2.51223600  | -2.93680200 |
| H  | -0.30300900 | 3.39962700  | -3.04499100 |
| H  | -0.72168900 | 1.85878400  | -3.79494500 |
| P  | -2.67839000 | 3.05807000  | -3.18438500 |
| H  | -2.54504700 | 3.81857500  | -4.37869200 |
| H  | -3.30645600 | 1.88743600  | -3.68663800 |
| O  | -3.39426900 | 3.73258500  | -2.05050400 |
| H  | 1.49699200  | 1.96930900  | -2.18467300 |
| H  | 0.76367400  | 0.43016900  | -2.60747000 |
| C  | -0.58833000 | 2.85965900  | -0.47550600 |
| H  | -0.36982900 | 2.42675600  | 0.50120200  |
| H  | 0.17663200  | 3.61722900  | -0.67466600 |
| H  | -1.55881400 | 3.35785800  | -0.42118600 |
| C  | -2.13309400 | 0.57681100  | 1.55889300  |
| C  | -3.13181600 | 1.56281400  | 1.43725600  |
| C  | -1.57509700 | 0.32191600  | 2.82413700  |
| C  | -3.55069500 | 2.28259400  | 2.55639400  |
| H  | -3.58062900 | 1.78412900  | 0.47582300  |
| C  | -2.00510700 | 1.04351600  | 3.94208600  |
| H  | -0.80481800 | -0.43315200 | 2.92669600  |
| C  | -2.98886700 | 2.02412700  | 3.81041200  |
| H  | -4.31289900 | 3.04548100  | 2.44737900  |
| H  | -1.56831500 | 0.83658000  | 4.91283800  |
| H  | -3.31777800 | 2.58579800  | 4.67735600  |
| C  | -3.06336800 | -1.46565100 | -0.22755600 |
| C  | -3.15780600 | -2.15786400 | -1.45237300 |
| C  | -4.09373700 | -1.61938800 | 0.71535500  |
| C  | -4.26204400 | -2.96679800 | -1.72535400 |
| H  | -2.34931300 | -2.08902300 | -2.17182100 |
| C  | -5.19369300 | -2.43479600 | 0.43748300  |
| H  | -4.04032800 | -1.09794900 | 1.66258900  |

|   |             |             |             |
|---|-------------|-------------|-------------|
| C | -5.28389000 | -3.10588300 | -0.78290400 |
| H | -4.32008300 | -3.49287600 | -2.67188400 |
| H | -5.98103900 | -2.54020600 | 1.17531900  |
| H | -6.14046100 | -3.73461200 | -0.99707500 |
| C | 2.29156200  | 1.65185300  | 0.67381400  |
| C | 2.90370500  | 2.80868000  | 0.15128500  |
| C | 2.13664100  | 1.53656200  | 2.06566500  |
| C | 3.34186200  | 3.82444200  | 1.00079700  |
| H | 3.04464000  | 2.91502600  | -0.91855300 |
| C | 2.57662900  | 2.55901900  | 2.91230000  |
| H | 1.67608600  | 0.64589200  | 2.47622000  |
| C | 3.17600600  | 3.70232500  | 2.38395000  |
| H | 3.80974100  | 4.71010200  | 0.58589200  |
| H | 2.44606900  | 2.45954900  | 3.98400700  |
| H | 3.51291100  | 4.49504700  | 3.04198100  |
| C | 3.19777400  | -0.28512400 | -1.28460700 |
| C | 3.04968700  | -1.33579600 | -2.21348300 |
| C | 4.47890000  | 0.23661500  | -1.04488900 |
| C | 4.15876400  | -1.82363500 | -2.90442900 |
| H | 2.07456500  | -1.79241700 | -2.35702700 |
| C | 5.58593300  | -0.26466500 | -1.73586800 |
| H | 4.61680100  | 1.02680100  | -0.31819600 |
| C | 5.42851500  | -1.28815800 | -2.67074000 |
| H | 4.03266700  | -2.63395000 | -3.61400600 |
| H | 6.57016600  | 0.14533200  | -1.53842800 |
| H | 6.28924600  | -1.67467800 | -3.20456900 |
| C | 2.05330100  | -2.24499200 | 2.17988500  |
| O | 1.07986900  | -1.44521900 | 2.41447700  |
| O | 2.21856700  | -2.67376700 | 1.00003400  |
| C | 2.96195400  | -2.67109400 | 3.30434700  |
| H | 3.84723700  | -3.17034900 | 2.90871000  |
| H | 3.25291100  | -1.80345100 | 3.90254000  |
| H | 2.42394700  | -3.36169000 | 3.96261900  |
| C | -0.22545300 | -3.32940500 | -0.76544700 |
| O | 0.03023900  | -2.34503300 | -1.61352700 |
| H | 0.55461500  | -4.08735600 | -0.61509600 |
| H | -1.24805100 | -3.72575000 | -0.75944100 |
| H | -0.46398900 | -2.91864000 | 0.78432800  |

IXace

Zero-point = -2655.987554

|    |             |             |             |
|----|-------------|-------------|-------------|
| Ru | 0.51240800  | -1.43191100 | 0.21917700  |
| P  | 1.55901100  | 0.41848000  | -0.35177800 |
| P  | -1.49643200 | -0.42713500 | 0.09619400  |
| C  | -1.73518600 | 0.67154600  | -1.38394900 |
| H  | -1.66687200 | -0.03574600 | -2.21819500 |
| H  | -2.75845500 | 1.05901100  | -1.36065800 |
| C  | 0.72930700  | 1.30797500  | -1.76717400 |

|   |             |             |             |
|---|-------------|-------------|-------------|
| C | -0.72882400 | 1.83126200  | -1.62214200 |
| C | -1.06595100 | 2.47772400  | -3.00348700 |
| H | -0.48097000 | 3.39728600  | -3.12527200 |
| H | -0.78359000 | 1.80645400  | -3.82766400 |
| P | -2.82672600 | 2.90771700  | -3.32199400 |
| H | -2.70399500 | 3.62087500  | -4.54625100 |
| H | -3.37175100 | 1.68086300  | -3.78442400 |
| O | -3.61091600 | 3.58991300  | -2.23874100 |
| H | 1.38063400  | 2.13473900  | -2.07267900 |
| H | 0.75264000  | 0.55743400  | -2.56369500 |
| C | -0.83812700 | 2.92976500  | -0.54542200 |
| H | -0.63596000 | 2.54641700  | 0.45503200  |
| H | -0.11133800 | 3.72501800  | -0.74243900 |
| H | -1.83607200 | 3.37377300  | -0.55208100 |
| C | -2.15383700 | 0.49733900  | 1.54699300  |
| C | -3.16779800 | 1.46852300  | 1.44509200  |
| C | -1.66152700 | 0.15600800  | 2.82016300  |
| C | -3.66622800 | 2.09057300  | 2.59127200  |
| H | -3.56859100 | 1.75334900  | 0.47930600  |
| C | -2.16997500 | 0.77807100  | 3.96329500  |
| H | -0.88273300 | -0.59324800 | 2.90877800  |
| C | -3.16919900 | 1.74655800  | 3.85120000  |
| H | -4.44091700 | 2.84293900  | 2.49783300  |
| H | -1.78376900 | 0.50463400  | 4.93902000  |
| H | -3.55976700 | 2.23131800  | 4.73869000  |
| C | -2.82704000 | -1.68313000 | -0.18958200 |
| C | -2.66448200 | -2.59317500 | -1.25448900 |
| C | -3.96979100 | -1.77847100 | 0.62280800  |
| C | -3.63524800 | -3.56434200 | -1.50343300 |
| H | -1.76453400 | -2.53039700 | -1.85867400 |
| C | -4.93320700 | -2.75798000 | 0.36908500  |
| H | -4.10908600 | -1.08977900 | 1.44613800  |
| C | -4.77028800 | -3.64981600 | -0.69268900 |
| H | -3.50087800 | -4.25856300 | -2.32575400 |
| H | -5.81115100 | -2.82142600 | 1.00211400  |
| H | -5.52048200 | -4.40851800 | -0.88464800 |
| C | 1.94954800  | 1.71736300  | 0.89334700  |
| C | 2.49633800  | 2.95695700  | 0.50606500  |
| C | 1.71575900  | 1.47040500  | 2.25532600  |
| C | 2.78023600  | 3.93266500  | 1.46053800  |
| H | 2.71156000  | 3.15520900  | -0.53805400 |
| C | 2.00235400  | 2.45377200  | 3.20800700  |
| H | 1.32486600  | 0.50800600  | 2.56164200  |
| C | 2.52758500  | 3.68423300  | 2.81378700  |
| H | 3.19826100  | 4.88402600  | 1.15153800  |
| H | 1.81267200  | 2.25390600  | 4.25653100  |
| H | 2.74476200  | 4.44609500  | 3.55361800  |
| C | 3.21235500  | 0.05973700  | -1.09201700 |

|   |            |             |             |
|---|------------|-------------|-------------|
| C | 3.27014900 | -0.69633400 | -2.27885900 |
| C | 4.41185400 | 0.46347300  | -0.48159200 |
| C | 4.50112700 | -1.01522800 | -2.85139400 |
| H | 2.34828200 | -1.05739000 | -2.71975900 |
| C | 5.64131100 | 0.13195600  | -1.05635000 |
| H | 4.38749000 | 1.03730700  | 0.43610900  |
| C | 5.68920800 | -0.60143000 | -2.24291000 |
| H | 4.53296700 | -1.59755400 | -3.76557600 |
| H | 6.55992300 | 0.44826900  | -0.57505700 |
| H | 6.64500900 | -0.85611700 | -2.68639500 |
| C | 1.93572000 | -2.53082900 | 2.05291100  |
| O | 1.02496700 | -1.68001800 | 2.34824700  |
| O | 2.18037000 | -2.77781100 | 0.83090300  |
| C | 2.67710700 | -3.25449800 | 3.14842400  |
| H | 3.66984600 | -3.54722400 | 2.80218600  |
| H | 2.74934900 | -2.62832000 | 4.03996000  |
| H | 2.12510600 | -4.16297400 | 3.41432000  |
| C | 0.81085300 | -3.13440900 | -2.09019400 |
| O | 0.31244100 | -1.84932100 | -1.80292500 |
| H | 1.86581200 | -3.26195200 | -1.79917900 |
| H | 0.73951200 | -3.31637200 | -3.17590800 |
| H | 0.23894700 | -3.94285300 | -1.59624300 |

Xace

Zero-point = -2657.161168

|    |             |             |             |
|----|-------------|-------------|-------------|
| Ru | 0.46322100  | -1.44702300 | 0.52754400  |
| P  | 1.58079100  | 0.32098000  | -0.43761000 |
| P  | -1.55251900 | -0.44708600 | 0.21417400  |
| C  | -1.74304600 | 0.45293600  | -1.40447200 |
| H  | -1.68761400 | -0.36102900 | -2.13552000 |
| H  | -2.76276100 | 0.84933000  | -1.42888300 |
| C  | 0.70850400  | 0.99310500  | -1.94067400 |
| C  | -0.73342800 | 1.56000000  | -1.80842000 |
| C  | -1.10922100 | 2.04371200  | -3.24588500 |
| H  | -0.52219000 | 2.93703200  | -3.49049400 |
| H  | -0.85566600 | 1.27872000  | -3.99431600 |
| P  | -2.87629700 | 2.45020500  | -3.56210300 |
| H  | -2.78379000 | 3.03068800  | -4.85706100 |
| H  | -3.43843700 | 1.18547400  | -3.87922700 |
| O  | -3.62989100 | 3.24669800  | -2.53641100 |
| H  | 1.35739900  | 1.75181400  | -2.39181700 |
| H  | 0.68136500  | 0.13262600  | -2.61573000 |
| C  | -0.79420900 | 2.78060200  | -0.86851600 |
| H  | -0.57532400 | 2.51399100  | 0.16570200  |
| H  | -0.05697200 | 3.53054200  | -1.17397400 |
| H  | -1.78440100 | 3.24036600  | -0.90385500 |
| C  | -2.17919500 | 0.69407200  | 1.51642700  |
| C  | -3.19342600 | 1.64316400  | 1.28419300  |

|   |             |             |             |
|---|-------------|-------------|-------------|
| C | -1.65059200 | 0.56463100  | 2.81370000  |
| C | -3.65962600 | 2.44558500  | 2.32701100  |
| H | -3.61618000 | 1.77343000  | 0.29455700  |
| C | -2.12661900 | 1.36713200  | 3.85398800  |
| H | -0.86321100 | -0.15747400 | 3.00016100  |
| C | -3.12901400 | 2.30807100  | 3.61274300  |
| H | -4.43434700 | 3.17839000  | 2.13284000  |
| H | -1.71167200 | 1.25607400  | 4.84971100  |
| H | -3.49483100 | 2.93299900  | 4.41947300  |
| C | -2.94916100 | -1.64763300 | 0.03210800  |
| C | -2.79082500 | -2.69514700 | -0.89839300 |
| C | -4.13346600 | -1.57121100 | 0.78164300  |
| C | -3.80501900 | -3.63630200 | -1.07555000 |
| H | -1.86149700 | -2.75834400 | -1.45751600 |
| C | -5.14250500 | -2.52226500 | 0.60130400  |
| H | -4.27008900 | -0.77401600 | 1.50134200  |
| C | -4.98251600 | -3.55266300 | -0.32601500 |
| H | -3.67381200 | -4.43838400 | -1.79369000 |
| H | -6.05240300 | -2.45448200 | 1.18701600  |
| H | -5.76746800 | -4.28788300 | -0.46222000 |
| C | 2.04995600  | 1.81260800  | 0.53415400  |
| C | 2.67697200  | 2.91175000  | -0.08645300 |
| C | 1.76777600  | 1.87657500  | 1.90791100  |
| C | 2.99472900  | 4.05258600  | 0.64887500  |
| H | 2.92877400  | 2.86965900  | -1.14042200 |
| C | 2.08861400  | 3.02450700  | 2.64030200  |
| H | 1.31571600  | 1.02402700  | 2.39825800  |
| C | 2.69521600  | 4.11292800  | 2.01408300  |
| H | 3.47535700  | 4.89265900  | 0.16039000  |
| H | 1.86094700  | 3.06346100  | 3.69957700  |
| H | 2.93900300  | 5.00276600  | 2.58305600  |
| C | 3.19196800  | -0.19952400 | -1.17304800 |
| C | 3.19411700  | -1.08461900 | -2.26775800 |
| C | 4.42089300  | 0.20920400  | -0.62780900 |
| C | 4.39852700  | -1.52741700 | -2.81447700 |
| H | 2.25141900  | -1.44980400 | -2.65516200 |
| C | 5.62300500  | -0.24462800 | -1.17562700 |
| H | 4.44106700  | 0.88290000  | 0.21953700  |
| C | 5.61576800  | -1.10803700 | -2.27205400 |
| H | 4.38551400  | -2.20920400 | -3.65760800 |
| H | 6.56355000  | 0.07856500  | -0.74376800 |
| H | 6.55027000  | -1.45708700 | -2.69622900 |
| C | 2.19653200  | -1.91551600 | 2.38683200  |
| O | 1.19027800  | -1.15596700 | 2.60681100  |
| O | 2.35912700  | -2.40687000 | 1.22958200  |
| C | 3.15236500  | -2.24039100 | 3.50803800  |
| H | 2.69598100  | -2.98895700 | 4.16503800  |
| H | 4.08409300  | -2.64345300 | 3.10892700  |



|   |             |             |             |
|---|-------------|-------------|-------------|
| H | 3.34849400  | -1.34828800 | 4.10792600  |
| C | 0.73226800  | -3.39304200 | -1.62784800 |
| O | 0.26705400  | -2.08235700 | -1.46078200 |
| H | 1.74974400  | -3.54889400 | -1.23301200 |
| H | 0.75353000  | -3.64451700 | -2.70248300 |
| H | 0.07812600  | -4.14507100 | -1.13784000 |
| H | -0.21196700 | -3.13476300 | 0.85525300  |
| H | -0.50168100 | -2.69701100 | 1.45776800  |

TSXace

Zero-point = -2657.131395

|    |             |             |             |
|----|-------------|-------------|-------------|
| Ru | 0.43057400  | -1.60397500 | 0.09726300  |
| P  | 1.67228900  | 0.32036400  | -0.33973900 |
| P  | -1.52483400 | -0.43690000 | 0.07031500  |
| C  | -1.66384600 | 0.89390000  | -1.23289000 |
| H  | -1.70976700 | 0.34483500  | -2.18046800 |
| H  | -2.62962800 | 1.38913700  | -1.09441700 |
| C  | 0.84346500  | 1.40574300  | -1.61670600 |
| C  | -0.57109900 | 1.99281600  | -1.34214400 |
| C  | -0.88964500 | 2.85902200  | -2.60410200 |
| H  | -0.25037400 | 3.74983000  | -2.59619500 |
| H  | -0.65315100 | 2.30708800  | -3.52604900 |
| P  | -2.61881200 | 3.44024800  | -2.83965600 |
| H  | -2.45055100 | 4.30329700  | -3.95733900 |
| H  | -3.23900700 | 2.32421600  | -3.46553100 |
| O  | -3.36196300 | 4.01163000  | -1.66883400 |
| H  | 1.52648400  | 2.22484900  | -1.86819600 |
| H  | 0.79870100  | 0.76459000  | -2.50537400 |
| C  | -0.58951600 | 2.92168800  | -0.11142500 |
| H  | -0.38087600 | 2.38145600  | 0.81238300  |
| H  | 0.16963800  | 3.70378200  | -0.21219800 |
| H  | -1.56608200 | 3.40215500  | -0.01426900 |
| C  | -2.07167500 | 0.40212700  | 1.62634400  |
| C  | -3.19269300 | 1.25393800  | 1.64228800  |
| C  | -1.39800300 | 0.13851000  | 2.82978700  |
| C  | -3.60976600 | 1.84923000  | 2.83172400  |
| H  | -3.74814300 | 1.45438900  | 0.73333700  |
| C  | -1.82727500 | 0.73287300  | 4.02114000  |
| H  | -0.55058900 | -0.53432500 | 2.83384300  |
| C  | -2.92583200 | 1.59181300  | 4.02405100  |
| H  | -4.46839700 | 2.51077100  | 2.82807300  |
| H  | -1.30030000 | 0.51976200  | 4.94473800  |
| H  | -3.25389200 | 2.05483800  | 4.94769000  |
| C  | -3.06616200 | -1.41711700 | -0.26651100 |
| C  | -4.02597500 | -1.08608600 | -1.23729900 |
| C  | -3.28467800 | -2.55516000 | 0.53409800  |
| C  | -5.16713400 | -1.87678400 | -1.40866200 |
| H  | -3.89862100 | -0.21652400 | -1.86905200 |

|   |             |             |             |
|---|-------------|-------------|-------------|
| C | -4.42562200 | -3.33735400 | 0.36449000  |
| H | -2.54986200 | -2.83090400 | 1.28281400  |
| C | -5.36989500 | -3.00192800 | -0.61049500 |
| H | -5.89569200 | -1.60780100 | -2.16525900 |
| H | -4.57631600 | -4.20970500 | 0.99028200  |
| H | -6.25474800 | -3.61309900 | -0.74489400 |
| C | 2.24959000  | 1.50786800  | 0.95114700  |
| C | 2.78840700  | 2.76885800  | 0.62428000  |
| C | 2.16556300  | 1.14164200  | 2.30501200  |
| C | 3.22301200  | 3.63784100  | 1.62513900  |
| H | 2.87441400  | 3.07461200  | -0.41212900 |
| C | 2.60214500  | 2.01661000  | 3.30451100  |
| H | 1.75706600  | 0.17398600  | 2.56771500  |
| C | 3.12854900  | 3.26374400  | 2.96888000  |
| H | 3.63287100  | 4.60537100  | 1.35802200  |
| H | 2.52630500  | 1.72103300  | 4.34494800  |
| H | 3.46319500  | 3.94187100  | 3.74540400  |
| C | 3.23035100  | -0.09765500 | -1.24665300 |
| C | 3.15269200  | -1.10072200 | -2.23452100 |
| C | 4.46880000  | 0.51401600  | -0.99179600 |
| C | 4.28744100  | -1.45396000 | -2.96594600 |
| H | 2.21833900  | -1.63222800 | -2.39214500 |
| C | 5.60038500  | 0.14994500  | -1.72645400 |
| H | 4.55624300  | 1.26345300  | -0.21603900 |
| C | 5.51150800  | -0.82747700 | -2.71853000 |
| H | 4.21687500  | -2.23313400 | -3.71685600 |
| H | 6.55095500  | 0.62779500  | -1.51686000 |
| H | 6.39203600  | -1.10921200 | -3.28481700 |
| C | 2.00130000  | -2.58614600 | 1.85581400  |
| O | 1.01915400  | -1.82443600 | 2.17936100  |
| O | 2.23523100  | -2.78332400 | 0.62907400  |
| C | 2.82551700  | -3.24520900 | 2.93041100  |
| H | 2.25918100  | -4.08123400 | 3.35510600  |
| H | 3.75805600  | -3.62542200 | 2.51150300  |
| H | 3.03127700  | -2.53884600 | 3.73869600  |
| C | -0.70167100 | -2.23842000 | -2.88346600 |
| O | 0.29131900  | -2.45268300 | -1.90666500 |
| H | -0.60598400 | -3.00218100 | -3.66856300 |
| H | -0.58212900 | -1.25445800 | -3.36644100 |
| H | -1.72210500 | -2.29684600 | -2.48084500 |
| H | -0.17822200 | -3.06814500 | -0.81952600 |
| H | -0.40140900 | -3.18834900 | 0.12292600  |

Xlace

Zero-point =

|    |             |             |             |
|----|-------------|-------------|-------------|
| Ru | -0.36236800 | 1.40039400  | 0.60817300  |
| P  | -1.72811400 | -0.30303300 | -0.42552700 |
| P  | 1.61511400  | 0.44868600  | 0.03444000  |

|   |             |             |             |
|---|-------------|-------------|-------------|
| C | 1.61710200  | -0.81509700 | -1.35260100 |
| H | 1.58302500  | -0.20062800 | -2.26150600 |
| H | 2.60751100  | -1.27830800 | -1.33898000 |
| C | -0.87149800 | -1.28892000 | -1.76425400 |
| C | 0.51987000  | -1.91042700 | -1.45274600 |
| C | 0.84690900  | -2.80950800 | -2.68836600 |
| H | 0.18270800  | -3.68198800 | -2.68089900 |
| H | 0.65642600  | -2.27109600 | -3.62867200 |
| P | 2.57105300  | -3.43780600 | -2.83891100 |
| H | 2.41856800  | -4.39258000 | -3.88102300 |
| H | 3.23045400  | -2.39003600 | -3.53432700 |
| O | 3.26976400  | -3.92246700 | -1.60067200 |
| H | -1.55113600 | -2.08696400 | -2.08589000 |
| H | -0.75442300 | -0.59989700 | -2.61003600 |
| C | 0.46245300  | -2.81717800 | -0.20770800 |
| H | 0.32383700  | -2.23810900 | 0.70635100  |
| H | -0.37724600 | -3.51519400 | -0.28740200 |
| H | 1.38121200  | -3.39754100 | -0.10824100 |
| C | 2.48796000  | -0.38170900 | 1.43616500  |
| C | 3.21225700  | -1.58343600 | 1.32182900  |
| C | 2.47582000  | 0.28543800  | 2.67649300  |
| C | 3.90219700  | -2.10014500 | 2.42261600  |
| H | 3.24749200  | -2.13953600 | 0.39274800  |
| C | 3.17112200  | -0.23405900 | 3.76862900  |
| H | 1.90664400  | 1.20089800  | 2.77878900  |
| C | 3.88503600  | -1.42826600 | 3.64544000  |
| H | 4.45079300  | -3.02913300 | 2.31661500  |
| H | 3.15059500  | 0.29285800  | 4.71605700  |
| H | 4.42206200  | -1.83255800 | 4.49599300  |
| C | 2.99571000  | 1.49430100  | -0.64202700 |
| C | 2.74362500  | 2.78416000  | -1.13555500 |
| C | 4.30590300  | 0.98324000  | -0.72186700 |
| C | 3.77289700  | 3.53694500  | -1.71034000 |
| H | 1.75787100  | 3.22379800  | -1.05258300 |
| C | 5.32896100  | 1.73818500  | -1.29552600 |
| H | 4.53368800  | 0.00665700  | -0.31056100 |
| C | 5.06391400  | 3.01605300  | -1.79611000 |
| H | 3.56022100  | 4.53372300  | -2.08044600 |
| H | 6.33342200  | 1.33265000  | -1.34312900 |
| H | 5.86103900  | 3.60297300  | -2.23811300 |
| C | -2.60876400 | -1.62379200 | 0.53061400  |
| C | -3.64764400 | -2.37737300 | -0.04670400 |
| C | -2.21949900 | -1.90077100 | 1.85242900  |
| C | -4.27011200 | -3.39457800 | 0.67711900  |
| H | -3.98102500 | -2.15631800 | -1.05490200 |
| C | -2.84828100 | -2.92029100 | 2.57347300  |
| H | -1.43255400 | -1.31418100 | 2.31151700  |
| C | -3.86966500 | -3.66960700 | 1.98826200  |

|   |             |             |             |
|---|-------------|-------------|-------------|
| H | -5.07025000 | -3.96774600 | 0.22219500  |
| H | -2.53728900 | -3.12642300 | 3.59162000  |
| H | -4.35593300 | -4.45930900 | 2.54954100  |
| C | -3.15572400 | 0.40773900  | -1.37182300 |
| C | -3.44528000 | 0.13522400  | -2.71977800 |
| C | -3.99361700 | 1.30048800  | -0.66986800 |
| C | -4.54018500 | 0.73757600  | -3.34919800 |
| H | -2.82727600 | -0.54633400 | -3.29070000 |
| C | -5.08684500 | 1.89296800  | -1.30077000 |
| H | -3.77076400 | 1.53950600  | 0.36512500  |
| C | -5.36284200 | 1.61478100  | -2.64300800 |
| H | -4.74762200 | 0.51695900  | -4.39044500 |
| H | -5.71901900 | 2.57745800  | -0.74629500 |
| H | -6.20978100 | 2.08081100  | -3.13311300 |
| C | -1.60056100 | 1.47919200  | 2.82755400  |
| O | -0.58641000 | 0.72752500  | 2.61800100  |
| O | -2.05251600 | 2.17108000  | 1.86447700  |
| C | -2.20878500 | 1.55830600  | 4.20234400  |
| H | -1.76289500 | 2.40180600  | 4.74135400  |
| H | -3.28412100 | 1.73378100  | 4.12992300  |
| H | -2.00775900 | 0.64496700  | 4.76508900  |
| C | -0.90876600 | 3.14974500  | -1.12103500 |
| O | -0.18430600 | 4.31068900  | -0.81602400 |
| H | -1.08323800 | 3.13131600  | -2.20193600 |
| H | -1.87325300 | 3.07816500  | -0.61833700 |
| H | -0.24401200 | 2.19365200  | -1.03667100 |
| H | 0.54587400  | 2.59505600  | 1.26103800  |
| H | 0.01526900  | 4.25207400  | 0.13223100  |

**S11. Cartesian coordinates (Å) and zero-point corrected energies, (Hartrees) of optimized structures of stationary points for the methanol formation in presence of hexanoate anion.**

Ru-H<sub>hex</sub>

Zero-point = -2698.594221

|    |             |             |             |
|----|-------------|-------------|-------------|
| Ru | -0.12625500 | -0.95830000 | 1.01537900  |
| P  | -1.06038000 | 1.11911900  | 0.22202700  |
| P  | 1.99508400  | -0.48641000 | 0.40825700  |
| C  | 2.42803100  | 1.27103400  | -0.08634300 |
| H  | 2.54523400  | 1.79801200  | 0.86865100  |
| H  | 3.42477700  | 1.23054600  | -0.53379700 |
| C  | 0.16980500  | 2.47028000  | -0.21017400 |
| C  | 1.46056600  | 2.08344500  | -0.99048200 |
| C  | 2.13818100  | 3.44623300  | -1.34354900 |
| H  | 1.54486600  | 3.94966600  | -2.11612100 |
| H  | 2.15505700  | 4.11428900  | -0.46962700 |
| P  | 3.88022200  | 3.40032500  | -1.93556100 |
| H  | 4.04065400  | 4.73283600  | -2.40395100 |
| H  | 4.62516000  | 3.45434000  | -0.72740900 |

|   |             |             |             |
|---|-------------|-------------|-------------|
| O | 4.29066000  | 2.31533000  | -2.88992300 |
| H | -0.36457900 | 3.24628700  | -0.77068400 |
| H | 0.47455500  | 2.91241100  | 0.74626700  |
| C | 1.13360500  | 1.35332000  | -2.30764200 |
| H | 0.71567500  | 0.36229200  | -2.12064900 |
| H | 0.39664400  | 1.92122300  | -2.88495900 |
| H | 2.03059200  | 1.23439800  | -2.91849100 |
| C | 2.71454700  | -1.54969700 | -0.91689800 |
| C | 3.59234700  | -1.09263500 | -1.91739000 |
| C | 2.38061000  | -2.91773800 | -0.87874600 |
| C | 4.12607800  | -1.98865600 | -2.84904400 |
| H | 3.85932600  | -0.04653500 | -2.00935000 |
| C | 2.92262300  | -3.80515600 | -1.80812500 |
| H | 1.68530300  | -3.26949200 | -0.12579900 |
| C | 3.79728800  | -3.34345300 | -2.79498300 |
| H | 4.79506400  | -1.61810000 | -3.61731800 |
| H | 2.65616100  | -4.85525800 | -1.76471800 |
| H | 4.21388100  | -4.03367300 | -3.51979500 |
| C | 3.25175700  | -0.64876500 | 1.75948100  |
| C | 2.80799500  | -0.71350500 | 3.09048500  |
| C | 4.63351800  | -0.64913900 | 1.50205600  |
| C | 3.72401700  | -0.75717300 | 4.14419600  |
| H | 1.74249100  | -0.76675000 | 3.29626600  |
| C | 5.54720700  | -0.69881300 | 2.55629500  |
| H | 4.99366400  | -0.63586700 | 0.47912000  |
| C | 5.09468700  | -0.74661100 | 3.87793900  |
| H | 3.36780000  | -0.81318500 | 5.16669900  |
| H | 6.61090700  | -0.70765400 | 2.34652500  |
| H | 5.80676100  | -0.78787200 | 4.69419000  |
| C | -2.23628800 | 1.22285000  | -1.20879500 |
| C | -3.14481800 | 2.28654400  | -1.35638200 |
| C | -2.19750600 | 0.21951600  | -2.19358900 |
| C | -3.98043500 | 2.35367700  | -2.47268700 |
| H | -3.21136500 | 3.05159500  | -0.59096500 |
| C | -3.03413700 | 0.29356200  | -3.31123900 |
| H | -1.52420600 | -0.62109400 | -2.07287800 |
| C | -3.92335400 | 1.36012300  | -3.45469800 |
| H | -4.67773300 | 3.17784600  | -2.57440700 |
| H | -2.99271200 | -0.48530200 | -4.06455400 |
| H | -4.57334300 | 1.41458600  | -4.32045100 |
| C | -2.03725800 | 1.94927600  | 1.55955800  |
| C | -2.02579100 | 3.33088200  | 1.82479800  |
| C | -2.83865700 | 1.11396300  | 2.36570200  |
| C | -2.79281500 | 3.86218600  | 2.86542200  |
| H | -1.42216100 | 4.00101800  | 1.22448900  |
| C | -3.60650600 | 1.65143900  | 3.40028100  |
| H | -2.85388900 | 0.04542900  | 2.17615400  |
| C | -3.58387900 | 3.02496000  | 3.65427000  |

|   |             |             |             |
|---|-------------|-------------|-------------|
| H | -2.77179400 | 4.92916100  | 3.05777500  |
| H | -4.21711400 | 0.99515900  | 4.01028000  |
| H | -4.17618800 | 3.43950900  | 4.46184800  |
| C | -1.87206900 | -2.54159400 | 0.11514400  |
| O | -2.10366200 | -1.98793200 | 1.22817700  |
| O | -0.81028800 | -2.18898500 | -0.52172700 |
| C | -2.72766900 | -3.65242200 | -0.45229500 |
| H | -2.79293500 | -3.51264600 | -1.53791400 |
| H | -2.13457300 | -4.56588400 | -0.30900800 |
| H | 0.49874600  | -2.30916500 | 1.67397000  |
| C | -4.11658600 | -3.82696300 | 0.18711400  |
| H | -4.38505600 | -4.88841600 | 0.12797300  |
| H | -4.04321700 | -3.58247000 | 1.25262900  |
| C | -5.24774700 | -3.01207200 | -0.46170900 |
| H | -6.19636500 | -3.31313500 | 0.00465900  |
| H | -5.33207800 | -3.29808100 | -1.52113100 |
| C | -5.10990600 | -1.48777200 | -0.36481700 |
| H | -4.19869700 | -1.15918500 | -0.87584900 |
| H | -4.98883600 | -1.20041100 | 0.68723200  |
| C | -6.30740900 | -0.74633700 | -0.96837400 |
| H | -6.17326800 | 0.33772500  | -0.90428700 |
| H | -6.43620500 | -0.99951400 | -2.02736700 |
| H | -7.23954000 | -1.00496800 | -0.45168600 |

lhex

Zero-point = -2887.186152

|    |             |             |             |
|----|-------------|-------------|-------------|
| Ru | -0.39708300 | -0.74655300 | 0.71573500  |
| P  | -0.48620100 | 1.71891000  | 0.23905300  |
| P  | 1.81231900  | -0.99442900 | 0.17133000  |
| C  | 2.85517700  | 0.55172800  | 0.29730600  |
| H  | 2.95538100  | 0.72450400  | 1.37499700  |
| H  | 3.84591400  | 0.25948100  | -0.06090800 |
| C  | 1.19964100  | 2.52384600  | 0.34620200  |
| C  | 2.41227000  | 1.87769900  | -0.38425400 |
| C  | 3.57237700  | 2.91244700  | -0.21455000 |
| H  | 3.35498900  | 3.79344500  | -0.82985500 |
| H  | 3.63823600  | 3.25975400  | 0.82706300  |
| P  | 5.27684400  | 2.35788500  | -0.63997000 |
| H  | 5.96660600  | 3.60048800  | -0.65175200 |
| H  | 5.74297300  | 1.80702700  | 0.58301400  |
| O  | 5.46930200  | 1.48581000  | -1.84745000 |
| H  | 1.09701400  | 3.55635700  | -0.00714400 |
| H  | 1.42134800  | 2.56699100  | 1.41919200  |
| C  | 2.13577700  | 1.71374900  | -1.89104600 |
| H  | 1.34640900  | 0.98475200  | -2.08097900 |
| H  | 1.80936900  | 2.66753100  | -2.31908400 |
| H  | 3.03371200  | 1.38746600  | -2.41887600 |

|   |             |             |             |
|---|-------------|-------------|-------------|
| C | 2.15976700  | -1.68327600 | -1.50027700 |
| C | 3.37056400  | -1.45180400 | -2.18308800 |
| C | 1.19568100  | -2.52316600 | -2.08795500 |
| C | 3.60149800  | -2.04471400 | -3.42544900 |
| H | 4.13454700  | -0.79950500 | -1.77742200 |
| C | 1.43868900  | -3.11718900 | -3.32928000 |
| H | 0.25446300  | -2.69228700 | -1.58172200 |
| C | 2.63919600  | -2.87939200 | -3.99972700 |
| H | 4.53353900  | -1.84832100 | -3.94247400 |
| H | 0.68613700  | -3.76171300 | -3.76940600 |
| H | 2.82446100  | -3.33754400 | -4.96456800 |
| C | 2.81834400  | -2.09078200 | 1.26996100  |
| C | 2.95847800  | -1.76960300 | 2.63509300  |
| C | 3.43132700  | -3.25670000 | 0.78190000  |
| C | 3.69901700  | -2.59420500 | 3.48233900  |
| H | 2.46518800  | -0.89497200 | 3.04200600  |
| C | 4.16937500  | -4.07852000 | 1.63722900  |
| H | 3.33419200  | -3.52218400 | -0.26270700 |
| C | 4.30708300  | -3.74978400 | 2.98614200  |
| H | 3.79069900  | -2.33838900 | 4.53180100  |
| H | 4.63538000  | -4.97547800 | 1.24548100  |
| H | 4.87826600  | -4.39082500 | 3.64755800  |
| C | -1.19279200 | 2.40397000  | -1.32297000 |
| C | -1.49928800 | 3.77006100  | -1.46089300 |
| C | -1.41736800 | 1.54075500  | -2.41023800 |
| C | -1.99959800 | 4.26306900  | -2.66620400 |
| H | -1.36949700 | 4.44224100  | -0.61997500 |
| C | -1.91898800 | 2.04097700  | -3.61531400 |
| H | -1.21195800 | 0.48153700  | -2.30606300 |
| C | -2.20623900 | 3.40026200  | -3.74683100 |
| H | -2.23507100 | 5.31715000  | -2.76049900 |
| H | -2.08572900 | 1.36613400  | -4.44740100 |
| H | -2.59636400 | 3.78606500  | -4.68165400 |
| C | -1.40414700 | 2.66732200  | 1.53064700  |
| C | -0.98048200 | 3.91024900  | 2.03635800  |
| C | -2.59875400 | 2.10819300  | 2.02412600  |
| C | -1.73658900 | 4.57945800  | 3.00184400  |
| H | -0.05971900 | 4.36346200  | 1.69054800  |
| C | -3.35014800 | 2.78344100  | 2.98742200  |
| H | -2.92549400 | 1.13873200  | 1.66592700  |
| C | -2.92299300 | 4.01907100  | 3.47786500  |
| H | -1.39528500 | 5.53544900  | 3.38292600  |
| H | -4.26325700 | 2.33516600  | 3.36213000  |
| H | -3.50528800 | 4.53761300  | 4.23071300  |
| C | -2.62555500 | -1.25396800 | -0.41866600 |
| O | -2.64464500 | -0.85440400 | 0.78115700  |
| O | -1.48255600 | -1.37271200 | -0.99454400 |
| C | -3.88823100 | -1.55173700 | -1.19049400 |

|   |             |             |             |
|---|-------------|-------------|-------------|
| H | -4.17927600 | -0.61920000 | -1.69606700 |
| H | -3.63843500 | -2.26613100 | -1.98224300 |
| H | -0.28533900 | -2.32811700 | 0.90970800  |
| C | -0.37575400 | -1.20984500 | 2.75682400  |
| O | 0.24417100  | -0.12084200 | 2.71819300  |
| O | -0.82412400 | -2.03440000 | 3.49442300  |
| C | -5.04319600 | -2.05971200 | -0.31819400 |
| H | -5.22878200 | -1.33591000 | 0.48296200  |
| H | -4.73758800 | -2.98982100 | 0.17766100  |
| C | -6.32875600 | -2.29889500 | -1.11855300 |
| H | -6.63055700 | -1.36377900 | -1.61280600 |
| H | -6.13051500 | -3.01768300 | -1.92694000 |
| C | -7.49042200 | -2.81397900 | -0.25934000 |
| H | -7.68745700 | -2.09609500 | 0.54822600  |
| H | -7.18809900 | -3.74777600 | 0.23347400  |
| C | -8.77518900 | -3.05024000 | -1.05957400 |
| H | -9.58390700 | -3.41739300 | -0.41922600 |
| H | -9.12190900 | -2.12569100 | -1.53556800 |
| H | -8.61790300 | -3.79000000 | -1.85301200 |

Ts1\_hex

Zero-point = -2887.182099

|    |             |             |             |
|----|-------------|-------------|-------------|
| Ru | -0.24378700 | -0.70516700 | 0.87428800  |
| P  | -0.62736500 | 1.56814400  | 0.19526400  |
| P  | 1.93152100  | -0.75158600 | 0.17196200  |
| C  | 2.78431300  | 0.87756100  | -0.16161300 |
| H  | 3.03040300  | 1.26743100  | 0.83300600  |
| H  | 3.73673900  | 0.61889600  | -0.63134300 |
| C  | 0.89921800  | 2.59832200  | -0.14307000 |
| C  | 2.06135800  | 1.98533400  | -0.97228500 |
| C  | 3.06313400  | 3.16309600  | -1.19745400 |
| H  | 2.62499400  | 3.87187800  | -1.91004100 |
| H  | 3.23503400  | 3.71647000  | -0.26245600 |
| P  | 4.74571400  | 2.73596300  | -1.81322400 |
| H  | 5.23885700  | 4.02276500  | -2.16079800 |
| H  | 5.46568200  | 2.49057600  | -0.61405700 |
| O  | 4.87748700  | 1.67320600  | -2.86617200 |
| H  | 0.56755500  | 3.52403100  | -0.62703400 |
| H  | 1.29091300  | 2.86841500  | 0.84456400  |
| C  | 1.57939600  | 1.49412800  | -2.35064300 |
| H  | 0.90500700  | 0.64078200  | -2.25964700 |
| H  | 1.03548200  | 2.29153300  | -2.86773600 |
| H  | 2.42447100  | 1.19275800  | -2.97252400 |
| C  | 2.22236300  | -1.76224000 | -1.34423600 |
| C  | 3.26631800  | -1.51188100 | -2.25625500 |
| C  | 1.38506200  | -2.87319200 | -1.56109800 |
| C  | 3.46079400  | -2.35355000 | -3.35370300 |
| H  | 3.92542400  | -0.65932000 | -2.14659400 |



|   |             |             |             |
|---|-------------|-------------|-------------|
| C | 1.59129200  | -3.71439500 | -2.65650100 |
| H | 0.56350900  | -3.06127500 | -0.88232500 |
| C | 2.62832300  | -3.45678800 | -3.55465200 |
| H | 4.26288000  | -2.13958700 | -4.05054000 |
| H | 0.93662700  | -4.56519000 | -2.80789900 |
| H | 2.78457100  | -4.10723800 | -4.40766200 |
| C | 3.18149300  | -1.44623000 | 1.34817000  |
| C | 3.32818700  | -0.85575400 | 2.61964700  |
| C | 3.98694100  | -2.54804000 | 1.01594100  |
| C | 4.26286200  | -1.35463200 | 3.52730400  |
| H | 2.68895200  | -0.03137100 | 2.91284900  |
| C | 4.91890900  | -3.04410500 | 1.93134800  |
| H | 3.88852700  | -3.01625600 | 0.04516100  |
| C | 5.06082900  | -2.44936900 | 3.18544900  |
| H | 4.35834300  | -0.89541800 | 4.50470000  |
| H | 5.53245100  | -3.89587600 | 1.66069100  |
| H | 5.78256300  | -2.83847600 | 3.89426000  |
| C | -1.73255500 | 2.02106200  | -1.22008600 |
| C | -2.36215700 | 3.27784300  | -1.28761300 |
| C | -1.93103700 | 1.10368800  | -2.26761600 |
| C | -3.15608000 | 3.61317700  | -2.38500400 |
| H | -2.24887000 | 3.98457900  | -0.47355700 |
| C | -2.72841500 | 1.44573900  | -3.36390400 |
| H | -1.47984900 | 0.12060300  | -2.21231700 |
| C | -3.33837800 | 2.69956200  | -3.42679200 |
| H | -3.63796500 | 4.58366500  | -2.42317500 |
| H | -2.87305900 | 0.72912400  | -4.16467800 |
| H | -3.95799900 | 2.96160000  | -4.27672500 |
| C | -1.38790200 | 2.52039500  | 1.58517300  |
| C | -1.03982800 | 3.84638100  | 1.90395400  |
| C | -2.37867600 | 1.87878400  | 2.35385900  |
| C | -1.66613800 | 4.51153400  | 2.96112500  |
| H | -0.28209700 | 4.37128200  | 1.33548400  |
| C | -3.00086500 | 2.54999200  | 3.40777200  |
| H | -2.65318800 | 0.85524900  | 2.12834100  |
| C | -2.64681500 | 3.86524400  | 3.71513500  |
| H | -1.38529900 | 5.53256900  | 3.19410100  |
| H | -3.75606700 | 2.03835400  | 3.99348100  |
| H | -3.12777900 | 4.38127200  | 4.53803100  |
| C | -2.43791700 | -1.57991800 | -0.08611600 |
| O | -2.43471100 | -1.07191700 | 1.07879500  |
| O | -1.33886500 | -1.58608200 | -0.74362300 |
| C | -3.69119000 | -2.17435000 | -0.67958600 |
| H | -3.48610300 | -2.43813400 | -1.72195800 |
| H | -3.88796500 | -3.10795500 | -0.13756500 |
| H | 0.10802000  | -2.21410800 | 1.45671200  |
| C | -0.05816100 | -1.54508600 | 2.93658800  |
| O | 0.29937800  | -0.35086500 | 2.96075200  |

|   |             |             |             |
|---|-------------|-------------|-------------|
| O | -0.35467200 | -2.46963600 | 3.63069000  |
| C | -4.90558600 | -1.23392100 | -0.57491200 |
| H | -4.66701900 | -0.29880100 | -1.09581500 |
| H | -5.05976300 | -0.97409900 | 0.47857700  |
| C | -6.19859200 | -1.82016400 | -1.16312200 |
| H | -6.95912500 | -1.02778100 | -1.18019100 |
| H | -6.03052500 | -2.09814600 | -2.21391900 |
| C | -6.76645100 | -3.02744400 | -0.40338300 |
| H | -6.04151800 | -3.85137300 | -0.40950900 |
| H | -6.90627700 | -2.75417100 | 0.65140900  |
| C | -8.09418600 | -3.52549700 | -0.98407800 |
| H | -7.97846300 | -3.83525000 | -2.02919300 |
| H | -8.47950200 | -4.38393100 | -0.42423800 |
| H | -8.85812400 | -2.73992500 | -0.95654400 |

llhex

Zero-point = -2887.203337

|    |             |             |             |
|----|-------------|-------------|-------------|
| Ru | 0.26572800  | -0.71158800 | -0.88033700 |
| P  | 0.52278100  | 1.33391500  | -0.08755600 |
| P  | -1.84190300 | -0.85647600 | -0.06415500 |
| C  | -2.87124600 | 0.67185000  | -0.29536900 |
| H  | -2.95589300 | 0.74712300  | -1.38496200 |
| H  | -3.87039500 | 0.46626200  | 0.10018300  |
| C  | -0.97296700 | 2.41175900  | -0.36341600 |
| C  | -2.34351200 | 2.02315000  | 0.26373500  |
| C  | -3.33060000 | 3.14317300  | -0.19615600 |
| H  | -3.08091800 | 4.07831800  | 0.31906000  |
| H  | -3.23135400 | 3.33346900  | -1.27460100 |
| P  | -5.12566400 | 2.83269100  | 0.07420400  |
| H  | -5.66472300 | 4.11142900  | -0.23359400 |
| H  | -5.49647200 | 2.10050300  | -1.08385200 |
| O  | -5.55943500 | 2.22983600  | 1.37944800  |
| H  | -0.70777400 | 3.42717900  | -0.04768800 |
| H  | -1.08134200 | 2.42129600  | -1.45188900 |
| C  | -2.28989300 | 2.04131700  | 1.80481600  |
| H  | -1.64336900 | 1.25950600  | 2.20422500  |
| H  | -1.89545100 | 3.00066600  | 2.15635800  |
| H  | -3.29041100 | 1.91084800  | 2.22281000  |
| C  | -2.11620400 | -1.42443900 | 1.66441800  |
| C  | -3.29372500 | -1.14483700 | 2.38327700  |
| C  | -1.13123200 | -2.23682700 | 2.25657300  |
| C  | -3.47168700 | -1.65663600 | 3.66990700  |
| H  | -4.07235100 | -0.52364900 | 1.95645300  |
| C  | -1.32023100 | -2.75143500 | 3.54165700  |
| H  | -0.22187000 | -2.46184400 | 1.71068200  |
| C  | -2.48720200 | -2.46032300 | 4.25065100  |
| H  | -4.37929600 | -1.42634800 | 4.21573100  |
| H  | -0.55538100 | -3.37899100 | 3.98562800  |

|   |             |             |             |
|---|-------------|-------------|-------------|
| H | -2.63086300 | -2.85709600 | 5.24912600  |
| C | -2.81230200 | -2.09655100 | -1.03668600 |
| C | -2.91105000 | -1.94104300 | -2.43544000 |
| C | -3.42424300 | -3.20717400 | -0.42909200 |
| C | -3.61712200 | -2.87241700 | -3.19807500 |
| H | -2.41879800 | -1.10514400 | -2.91891300 |
| C | -4.12451700 | -4.13624100 | -1.20204900 |
| H | -3.35876500 | -3.34357200 | 0.64256300  |
| C | -4.22403700 | -3.97126100 | -2.58468800 |
| H | -3.68497500 | -2.74020900 | -4.27200700 |
| H | -4.59307300 | -4.98718600 | -0.72069400 |
| H | -4.76798300 | -4.69510100 | -3.18063800 |
| C | 1.02138400  | 1.62005700  | 1.65927200  |
| C | 1.16289600  | 2.93095700  | 2.15616000  |
| C | 1.26268500  | 0.53394700  | 2.51411800  |
| C | 1.51724100  | 3.14488100  | 3.48714200  |
| H | 1.01193500  | 3.78122500  | 1.50000500  |
| C | 1.61808300  | 0.75574400  | 3.84879500  |
| H | 1.18454000  | -0.47436100 | 2.12923700  |
| C | 1.73979900  | 2.05635600  | 4.33746400  |
| H | 1.62210000  | 4.15689900  | 3.86122300  |
| H | 1.79664000  | -0.09057000 | 4.50230100  |
| H | 2.01141800  | 2.22563100  | 5.37301900  |
| C | 1.82424100  | 2.24190100  | -1.02755700 |
| C | 1.57915100  | 2.68517100  | -2.34126600 |
| C | 3.11015000  | 2.41106700  | -0.48218500 |
| C | 2.59351400  | 3.29555500  | -3.08028700 |
| H | 0.61306000  | 2.53303900  | -2.80527300 |
| C | 4.12071300  | 3.01836200  | -1.22917900 |
| H | 3.31932600  | 2.07301600  | 0.52539800  |
| C | 3.86479500  | 3.46396000  | -2.52744900 |
| H | 2.38949400  | 3.62657900  | -4.09197100 |
| H | 5.10653700  | 3.14275100  | -0.79547800 |
| H | 4.65150300  | 3.93350600  | -3.10652700 |
| C | 2.49157300  | -1.88330000 | -0.46430400 |
| O | 2.32033500  | -1.22125200 | -1.53622000 |
| O | 1.54630200  | -1.89775800 | 0.40471700  |
| C | 3.79071100  | -2.60129500 | -0.19781800 |
| H | 3.63965600  | -3.31233500 | 0.61998200  |
| H | 4.06095000  | -3.16112800 | -1.10037600 |
| H | 0.96325600  | -0.46590500 | -3.68933800 |
| C | 0.00505200  | 0.09474100  | -3.71919600 |
| O | -0.61532500 | 0.17156900  | -2.56049100 |
| O | -0.41564600 | 0.58925500  | -4.75250200 |
| C | 4.92160100  | -1.61081500 | 0.14800300  |
| H | 4.63942900  | -1.04478900 | 1.04603500  |
| H | 5.01394800  | -0.88315500 | -0.66674100 |
| C | 6.26679200  | -2.30751800 | 0.38366900  |

|   |            |             |             |
|---|------------|-------------|-------------|
| H | 6.54338600 | -2.87550900 | -0.51593600 |
| H | 6.15961700 | -3.04747400 | 1.18978600  |
| C | 7.39940400 | -1.33495400 | 0.73672300  |
| H | 7.12093700 | -0.76696700 | 1.63496200  |
| H | 7.50450400 | -0.59626100 | -0.06931400 |
| C | 8.74304800 | -2.03317500 | 0.96955000  |
| H | 9.06492800 | -2.58081400 | 0.07647300  |
| H | 9.52992800 | -1.31406600 | 1.21963200  |
| H | 8.67788700 | -2.75424500 | 1.79245900  |

Ilhex at T = 160°C

Zero-point = -2887.203337

|    |             |             |             |
|----|-------------|-------------|-------------|
| Ru | 0.26572800  | -0.71158800 | -0.88033700 |
| P  | 0.52278100  | 1.33391500  | -0.08755600 |
| P  | -1.84190300 | -0.85647600 | -0.06415500 |
| C  | -2.87124600 | 0.67185000  | -0.29536900 |
| H  | -2.95589300 | 0.74712300  | -1.38496200 |
| H  | -3.87039500 | 0.46626200  | 0.10018300  |
| C  | -0.97296700 | 2.41175900  | -0.36341600 |
| C  | -2.34351200 | 2.02315000  | 0.26373500  |
| C  | -3.33060000 | 3.14317300  | -0.19615600 |
| H  | -3.08091800 | 4.07831800  | 0.31906000  |
| H  | -3.23135400 | 3.33346900  | -1.27460100 |
| P  | -5.12566400 | 2.83269100  | 0.07420400  |
| H  | -5.66472300 | 4.11142900  | -0.23359400 |
| H  | -5.49647200 | 2.10050300  | -1.08385200 |
| O  | -5.55943500 | 2.22983600  | 1.37944800  |
| H  | -0.70777400 | 3.42717900  | -0.04768800 |
| H  | -1.08134200 | 2.42129600  | -1.45188900 |
| C  | -2.28989300 | 2.04131700  | 1.80481600  |
| H  | -1.64336900 | 1.25950600  | 2.20422500  |
| H  | -1.89545100 | 3.00066600  | 2.15635800  |
| H  | -3.29041100 | 1.91084800  | 2.22281000  |
| C  | -2.11620400 | -1.42443900 | 1.66441800  |
| C  | -3.29372500 | -1.14483700 | 2.38327700  |
| C  | -1.13123200 | -2.23682700 | 2.25657300  |
| C  | -3.47168700 | -1.65663600 | 3.66990700  |
| H  | -4.07235100 | -0.52364900 | 1.95645300  |
| C  | -1.32023100 | -2.75143500 | 3.54165700  |
| H  | -0.22187000 | -2.46184400 | 1.71068200  |
| C  | -2.48720200 | -2.46032300 | 4.25065100  |
| H  | -4.37929600 | -1.42634800 | 4.21573100  |
| H  | -0.55538100 | -3.37899100 | 3.98562800  |
| H  | -2.63086300 | -2.85709600 | 5.24912600  |
| C  | -2.81230200 | -2.09655100 | -1.03668600 |
| C  | -2.91105000 | -1.94104300 | -2.43544000 |
| C  | -3.42424300 | -3.20717400 | -0.42909200 |
| C  | -3.61712200 | -2.87241700 | -3.19807500 |

|   |             |             |             |
|---|-------------|-------------|-------------|
| H | -2.41879800 | -1.10514400 | -2.91891300 |
| C | -4.12451700 | -4.13624100 | -1.20204900 |
| H | -3.35876500 | -3.34357200 | 0.64256300  |
| C | -4.22403700 | -3.97126100 | -2.58468800 |
| H | -3.68497500 | -2.74020900 | -4.27200700 |
| H | -4.59307300 | -4.98718600 | -0.72069400 |
| H | -4.76798300 | -4.69510100 | -3.18063800 |
| C | 1.02138400  | 1.62005700  | 1.65927200  |
| C | 1.16289600  | 2.93095700  | 2.15616000  |
| C | 1.26268500  | 0.53394700  | 2.51411800  |
| C | 1.51724100  | 3.14488100  | 3.48714200  |
| H | 1.01193500  | 3.78122500  | 1.50000500  |
| C | 1.61808300  | 0.75574400  | 3.84879500  |
| H | 1.18454000  | -0.47436100 | 2.12923700  |
| C | 1.73979900  | 2.05635600  | 4.33746400  |
| H | 1.62210000  | 4.15689900  | 3.86122300  |
| H | 1.79664000  | -0.09057000 | 4.50230100  |
| H | 2.01141800  | 2.22563100  | 5.37301900  |
| C | 1.82424100  | 2.24190100  | -1.02755700 |
| C | 1.57915100  | 2.68517100  | -2.34126600 |
| C | 3.11015000  | 2.41106700  | -0.48218500 |
| C | 2.59351400  | 3.29555500  | -3.08028700 |
| H | 0.61306000  | 2.53303900  | -2.80527300 |
| C | 4.12071300  | 3.01836200  | -1.22917900 |
| H | 3.31932600  | 2.07301600  | 0.52539800  |
| C | 3.86479500  | 3.46396000  | -2.52744900 |
| H | 2.38949400  | 3.62657900  | -4.09197100 |
| H | 5.10653700  | 3.14275100  | -0.79547800 |
| H | 4.65150300  | 3.93350600  | -3.10652700 |
| C | 2.49157300  | -1.88330000 | -0.46430400 |
| O | 2.32033500  | -1.22125200 | -1.53622000 |
| O | 1.54630200  | -1.89775800 | 0.40471700  |
| C | 3.79071100  | -2.60129500 | -0.19781800 |
| H | 3.63965600  | -3.31233500 | 0.61998200  |
| H | 4.06095000  | -3.16112800 | -1.10037600 |
| H | 0.96325600  | -0.46590500 | -3.68933800 |
| C | 0.00505200  | 0.09474100  | -3.71919600 |
| O | -0.61532500 | 0.17156900  | -2.56049100 |
| O | -0.41564600 | 0.58925500  | -4.75250200 |
| C | 4.92160100  | -1.61081500 | 0.14800300  |
| H | 4.63942900  | -1.04478900 | 1.04603500  |
| H | 5.01394800  | -0.88315500 | -0.66674100 |
| C | 6.26679200  | -2.30751800 | 0.38366900  |
| H | 6.54338600  | -2.87550900 | -0.51593600 |
| H | 6.15961700  | -3.04747400 | 1.18978600  |
| C | 7.39940400  | -1.33495400 | 0.73672300  |
| H | 7.12093700  | -0.76696700 | 1.63496200  |
| H | 7.50450400  | -0.59626100 | -0.06931400 |

|   |            |             |            |
|---|------------|-------------|------------|
| C | 8.74304800 | -2.03317500 | 0.96955000 |
| H | 9.06492800 | -2.58081400 | 0.07647300 |
| H | 9.52992800 | -1.31406600 | 1.21963200 |
| H | 8.67788700 | -2.75424500 | 1.79245900 |

Illhex

Zero-point = -2888.378165

|    |             |             |             |
|----|-------------|-------------|-------------|
| Ru | 0.20389800  | -1.06509000 | -0.65426900 |
| P  | 0.64822400  | 1.18393900  | -0.33431100 |
| P  | -1.94989200 | -0.82501000 | 0.08403300  |
| C  | -2.79016300 | 0.74483800  | -0.45611300 |
| H  | -2.86335200 | 0.62256900  | -1.54195400 |
| H  | -3.80647800 | 0.70703700  | -0.05274000 |
| C  | -0.76744000 | 2.28352200  | -0.83922500 |
| C  | -2.15158400 | 2.12644200  | -0.14872700 |
| C  | -3.05515500 | 3.21984300  | -0.80462800 |
| H  | -2.72879000 | 4.20869300  | -0.46141700 |
| H  | -2.95040800 | 3.20894500  | -1.89916700 |
| P  | -4.86673700 | 3.10345000  | -0.49415600 |
| H  | -5.30602300 | 4.35148000  | -1.01374500 |
| H  | -5.30513700 | 2.22018000  | -1.51528700 |
| O  | -5.33687700 | 2.76291300  | 0.89105900  |
| H  | -0.42739500 | 3.31998900  | -0.73687200 |
| H  | -0.88725900 | 2.07747500  | -1.90645000 |
| C  | -2.07798200 | 2.41811800  | 1.36347400  |
| H  | -1.49354100 | 1.66996300  | 1.89949200  |
| H  | -1.60128700 | 3.38864600  | 1.53723600  |
| H  | -3.08057900 | 2.44635600  | 1.79567000  |
| C  | -2.27199600 | -0.99329800 | 1.88743000  |
| C  | -3.43360400 | -0.48962800 | 2.50449500  |
| C  | -1.34277500 | -1.71011000 | 2.66324300  |
| C  | -3.65046000 | -0.69331000 | 3.86816900  |
| H  | -4.16703200 | 0.07172700  | 1.93719800  |
| C  | -1.57062500 | -1.91556300 | 4.02668100  |
| H  | -0.44211100 | -2.09643500 | 2.19980200  |
| C  | -2.72154800 | -1.40695600 | 4.63070300  |
| H  | -4.54391600 | -0.29252900 | 4.33270300  |
| H  | -0.84757600 | -2.47169100 | 4.61304900  |
| H  | -2.89549400 | -1.56342800 | 5.68913600  |
| C  | -3.12370600 | -2.05536200 | -0.64495800 |
| C  | -3.20478700 | -2.15687700 | -2.04919000 |
| C  | -3.91051000 | -2.90821300 | 0.14649400  |
| C  | -4.06017400 | -3.08749500 | -2.63946900 |
| H  | -2.58440000 | -1.52031300 | -2.66986900 |
| C  | -4.76109300 | -3.84119100 | -0.45351400 |
| H  | -3.86363300 | -2.84316600 | 1.22598200  |
| C  | -4.83935800 | -3.93221500 | -1.84369100 |
| H  | -4.11272900 | -3.15454700 | -3.72033600 |

|   |             |             |             |
|---|-------------|-------------|-------------|
| H | -5.36256200 | -4.49388900 | 0.16904600  |
| H | -5.50054300 | -4.65673500 | -2.30498100 |
| C | 1.18853000  | 1.83644700  | 1.29784600  |
| C | 1.47104000  | 3.20732900  | 1.46179500  |
| C | 1.29773800  | 0.98006700  | 2.40464500  |
| C | 1.83724800  | 3.70806500  | 2.70997100  |
| H | 1.42002800  | 3.87764000  | 0.61077700  |
| C | 1.66555200  | 1.48900800  | 3.65463100  |
| H | 1.10987200  | -0.07836400 | 2.28118400  |
| C | 1.93013200  | 2.84937200  | 3.81056100  |
| H | 2.05156400  | 4.76443200  | 2.82534800  |
| H | 1.74195700  | 0.81864200  | 4.50321400  |
| H | 2.21160900  | 3.24175500  | 4.78094700  |
| C | 1.98423100  | 1.76297700  | -1.46581800 |
| C | 1.74297800  | 1.89550700  | -2.84648600 |
| C | 3.28433900  | 1.98914400  | -0.97878100 |
| C | 2.77754900  | 2.25953800  | -3.71011300 |
| H | 0.76643500  | 1.68480700  | -3.26262700 |
| C | 4.31361400  | 2.35043100  | -1.84948900 |
| H | 3.49171300  | 1.88763500  | 0.07932800  |
| C | 4.06293800  | 2.48896600  | -3.21585900 |
| H | 2.57513200  | 2.34993000  | -4.77105000 |
| H | 5.31017200  | 2.52191400  | -1.45839000 |
| H | 4.86401600  | 2.76748500  | -3.89081200 |
| C | 2.47012200  | -1.92422900 | 0.18749800  |
| O | 2.35560000  | -1.52503700 | -1.01119200 |
| O | 1.44707200  | -1.84740100 | 0.95730600  |
| C | 3.77724400  | -2.48149000 | 0.70033600  |
| H | 3.65926500  | -2.72662700 | 1.76013000  |
| H | 3.96780900  | -3.41973500 | 0.16239200  |
| H | 0.63571100  | -1.65527100 | -3.53234000 |
| C | -0.07050700 | -0.80067000 | -3.63236800 |
| O | -0.56406700 | -0.36735700 | -2.49791200 |
| O | -0.34041500 | -0.32753700 | -4.72513400 |
| H | 0.05845700  | -2.71992200 | -1.43911700 |
| H | -0.27620900 | -2.83739300 | -0.72352100 |
| C | 4.95828600  | -1.52039400 | 0.47916400  |
| H | 4.99615900  | -1.24738600 | -0.58105700 |
| H | 4.77209300  | -0.59043600 | 1.03346700  |
| C | 6.29963400  | -2.11789400 | 0.91933400  |
| H | 6.48335100  | -3.04693600 | 0.36067500  |
| H | 6.24423900  | -2.40695800 | 1.97885100  |
| C | 7.48400100  | -1.16417700 | 0.71709800  |
| H | 7.53573200  | -0.87355000 | -0.34079800 |
| H | 7.30102100  | -0.23740600 | 1.27806300  |
| C | 8.82474000  | -1.76655600 | 1.14904600  |
| H | 9.05231500  | -2.67527400 | 0.58016500  |
| H | 9.64891600  | -1.06264300 | 0.99367500  |

H 8.81428000 -2.03695100 2.21122900

TSIIIhex

Zero-point = -2888.376998

|    |             |             |             |
|----|-------------|-------------|-------------|
| Ru | 0.32194500  | -0.98910000 | -0.46519200 |
| P  | 0.57420900  | 1.34449700  | -0.54050500 |
| P  | -1.86744000 | -0.85825000 | 0.11397000  |
| C  | -2.82020600 | 0.58700800  | -0.59668300 |
| H  | -2.87772300 | 0.37338400  | -1.66968400 |
| H  | -3.83885100 | 0.50938400  | -0.20606600 |
| C  | -0.94292700 | 2.25725700  | -1.14667900 |
| C  | -2.29852400 | 2.03783100  | -0.41452200 |
| C  | -3.30140800 | 3.00147000  | -1.12765400 |
| H  | -3.05261900 | 4.03600300  | -0.86299500 |
| H  | -3.21175500 | 2.92251800  | -2.22141000 |
| P  | -5.09524600 | 2.76843700  | -0.78518400 |
| H  | -5.63285000 | 3.92726400  | -1.41008000 |
| H  | -5.46510100 | 1.76867000  | -1.72425900 |
| O  | -5.53835500 | 2.51512300  | 0.62627200  |
| H  | -0.71075500 | 3.32800800  | -1.15786400 |
| H  | -1.06067200 | 1.94919700  | -2.19144100 |
| C  | -2.22531900 | 2.44751800  | 1.06990200  |
| H  | -1.56337400 | 1.79667200  | 1.64143500  |
| H  | -1.83853300 | 3.46779900  | 1.16197800  |
| H  | -3.21734500 | 2.41108400  | 1.52539800  |
| C  | -2.29714800 | -0.86761300 | 1.90806000  |
| C  | -3.55448100 | -0.45703400 | 2.39221000  |
| C  | -1.34087400 | -1.35273800 | 2.81814100  |
| C  | -3.83936900 | -0.52179600 | 3.75649500  |
| H  | -4.31356000 | -0.07261700 | 1.72112500  |
| C  | -1.63722000 | -1.42188000 | 4.18291600  |
| H  | -0.36875100 | -1.66464200 | 2.45601500  |
| C  | -2.88283500 | -1.00542700 | 4.65399400  |
| H  | -4.80714500 | -0.19201400 | 4.11637800  |
| H  | -0.89170300 | -1.80042100 | 4.87356300  |
| H  | -3.10953500 | -1.05500200 | 5.71297200  |
| C  | -2.93711700 | -2.23373700 | -0.52353700 |
| C  | -3.23171600 | -2.32536400 | -1.89752000 |
| C  | -3.40474600 | -3.24589600 | 0.33179600  |
| C  | -3.97995200 | -3.39239700 | -2.39640600 |
| H  | -2.86130100 | -1.57312800 | -2.58432200 |
| C  | -4.14800700 | -4.31526700 | -0.17277600 |
| H  | -3.18943700 | -3.19700900 | 1.39174100  |
| C  | -4.44033100 | -4.39100600 | -1.53533700 |
| H  | -4.19866100 | -3.44639000 | -3.45717700 |
| H  | -4.50000400 | -5.08722800 | 0.50215300  |
| H  | -5.01890500 | -5.22096400 | -1.92395600 |
| C  | 1.07764300  | 2.34120100  | 0.93035000  |



|   |             |             |             |
|---|-------------|-------------|-------------|
| C | 1.24798200  | 3.73714300  | 0.84249300  |
| C | 1.25390900  | 1.71222900  | 2.17344900  |
| C | 1.57344000  | 4.48380900  | 1.97420900  |
| H | 1.14194200  | 4.23700900  | -0.11423500 |
| C | 1.58030500  | 2.46635100  | 3.30561100  |
| H | 1.14648300  | 0.63712100  | 2.24507000  |
| C | 1.73598000  | 3.84905800  | 3.21013600  |
| H | 1.70144300  | 5.55745900  | 1.89385700  |
| H | 1.70977900  | 1.96899500  | 4.26032900  |
| H | 1.98555500  | 4.43157200  | 4.08959200  |
| C | 1.81584000  | 1.87582900  | -1.80635300 |
| C | 1.53638700  | 1.71327000  | -3.17675200 |
| C | 3.08790800  | 2.34309800  | -1.43146500 |
| C | 2.49310900  | 2.03440800  | -4.14030500 |
| H | 0.58518900  | 1.30161000  | -3.49082200 |
| C | 4.04469000  | 2.65536500  | -2.39968000 |
| H | 3.33018100  | 2.46629800  | -0.38329800 |
| C | 3.74938200  | 2.50845700  | -3.75562600 |
| H | 2.25977300  | 1.90603800  | -5.19156600 |
| H | 5.02060900  | 3.01327000  | -2.09140200 |
| H | 4.49258800  | 2.75352300  | -4.50553700 |
| C | 2.55425000  | -1.48225100 | 0.66752700  |
| O | 2.52003200  | -1.32349500 | -0.58817100 |
| O | 1.47113900  | -1.31402600 | 1.33437200  |
| C | 3.81929000  | -1.89633000 | 1.38467500  |
| H | 3.77884100  | -2.99013300 | 1.49152300  |
| H | 3.77965600  | -1.49014800 | 2.40153500  |
| H | -0.19198600 | -1.99014000 | -4.26638300 |
| C | -0.04445600 | -1.99391700 | -3.17871800 |
| O | -0.23660100 | -0.91490600 | -2.55529800 |
| O | 0.30003700  | -3.09797200 | -2.65259300 |
| H | 0.29564200  | -2.87175800 | -1.46456700 |
| H | 0.18587900  | -2.69955200 | -0.42578500 |
| C | 5.10941800  | -1.48854000 | 0.66423500  |
| H | 5.08251400  | -1.88031900 | -0.35833100 |
| H | 5.13958400  | -0.39526800 | 0.56852100  |
| C | 6.37207300  | -1.97757300 | 1.38343500  |
| H | 6.33914100  | -3.07316100 | 1.47381200  |
| H | 6.38393200  | -1.59005300 | 2.41274100  |
| C | 7.67034400  | -1.56892100 | 0.67592900  |
| H | 7.70337700  | -0.47445700 | 0.58666100  |
| H | 7.65744600  | -1.95569900 | -0.35193100 |
| C | 8.93132000  | -2.06162000 | 1.39299500  |
| H | 8.94397500  | -3.15520900 | 1.46599900  |
| H | 9.83961900  | -1.75386700 | 0.86437000  |
| H | 8.98914200  | -1.66331000 | 2.41263500  |

IVhex

Zero-point = -2888.375896

|    |             |             |             |
|----|-------------|-------------|-------------|
| Ru | -0.11394400 | -0.79623200 | 0.87549300  |
| P  | -0.71936900 | 1.40909400  | 0.19106100  |
| P  | 2.00724200  | -0.66254000 | 0.10043900  |
| C  | 2.72578700  | 1.02813900  | -0.26042100 |
| H  | 2.96597200  | 1.45077200  | 0.72138300  |
| H  | 3.68237300  | 0.85215700  | -0.75886700 |
| C  | 0.69369600  | 2.57699300  | -0.19497800 |
| C  | 1.88660000  | 2.06563700  | -1.05174600 |
| C  | 2.77253800  | 3.32821100  | -1.30216100 |
| H  | 2.25808000  | 3.99037600  | -2.00865400 |
| H  | 2.91101100  | 3.90085400  | -0.37290300 |
| P  | 4.47647300  | 3.06012100  | -1.94517100 |
| H  | 4.84682900  | 4.39217200  | -2.27716100 |
| H  | 5.23165100  | 2.86599800  | -0.75772200 |
| O  | 4.69488000  | 2.03061800  | -3.01609800 |
| H  | 0.26907700  | 3.46639200  | -0.67495000 |
| H  | 1.08704500  | 2.88881800  | 0.78014400  |
| C  | 1.42439700  | 1.52626800  | -2.41879700 |
| H  | 0.82766700  | 0.61912100  | -2.31096600 |
| H  | 0.80503700  | 2.26983200  | -2.93126400 |
| H  | 2.28306900  | 1.29459300  | -3.05249400 |
| C  | 2.38191300  | -1.65874800 | -1.41029100 |
| C  | 3.41611900  | -1.34851200 | -2.31436500 |
| C  | 1.61130600  | -2.81581800 | -1.63326800 |
| C  | 3.66807700  | -2.17710300 | -3.40982800 |
| H  | 4.02089000  | -0.45731200 | -2.20060400 |
| C  | 1.87543200  | -3.64430800 | -2.72657000 |
| H  | 0.79594900  | -3.04655400 | -0.95992800 |
| C  | 2.90311800  | -3.32739600 | -3.61640300 |
| H  | 4.46054200  | -1.91629600 | -4.10183800 |
| H  | 1.27173900  | -4.53124000 | -2.88353400 |
| H  | 3.10355900  | -3.96734200 | -4.46825900 |
| C  | 3.32473200  | -1.25031500 | 1.27142300  |
| C  | 3.58916600  | -0.52246600 | 2.44860700  |
| C  | 4.03156800  | -2.44334800 | 1.04752300  |
| C  | 4.53798300  | -0.97322300 | 3.36747400  |
| H  | 3.04080300  | 0.38934300  | 2.65793400  |
| C  | 4.97622100  | -2.89396700 | 1.97310500  |
| H  | 3.84414200  | -3.01865200 | 0.14975200  |
| C  | 5.23408000  | -2.16155500 | 3.13261100  |
| H  | 4.73196400  | -0.39864200 | 4.26670800  |
| H  | 5.51240900  | -3.81694800 | 1.78323600  |
| H  | 5.96941900  | -2.51233400 | 3.84743100  |
| C  | -1.85965100 | 1.71393800  | -1.24055100 |
| C  | -2.55238800 | 2.93087900  | -1.38209100 |
| C  | -2.01955200 | 0.72367500  | -2.22595800 |
| C  | -3.37087900 | 3.15606100  | -2.48942700 |

|   |             |             |             |
|---|-------------|-------------|-------------|
| H | -2.46801400 | 3.69388500  | -0.61641700 |
| C | -2.84238500 | 0.95454800  | -3.33279600 |
| H | -1.51558800 | -0.22851400 | -2.11393400 |
| C | -3.51559400 | 2.16939500  | -3.46887900 |
| H | -3.90062000 | 4.09743100  | -2.58435500 |
| H | -2.95572700 | 0.18206100  | -4.08540600 |
| H | -4.15396800 | 2.34555500  | -4.32718300 |
| C | -1.59176900 | 2.35372200  | 1.52523600  |
| C | -1.33623000 | 3.69862900  | 1.84606000  |
| C | -2.58042100 | 1.66282100  | 2.25437400  |
| C | -2.04995000 | 4.33634300  | 2.86551700  |
| H | -0.58258500 | 4.26090300  | 1.30865200  |
| C | -3.29267300 | 2.30600700  | 3.26732400  |
| H | -2.77708900 | 0.62006600  | 2.03017300  |
| C | -3.02953600 | 3.64301800  | 3.57708000  |
| H | -1.83914600 | 5.37393100  | 3.10009600  |
| H | -4.04981500 | 1.75924000  | 3.81850800  |
| H | -3.58166500 | 4.13886600  | 4.36727000  |
| C | -2.25246400 | -1.94508400 | 0.08056800  |
| O | -2.24555800 | -1.39457800 | 1.22574700  |
| O | -1.20333600 | -1.85487300 | -0.64486400 |
| C | -3.46363600 | -2.69785900 | -0.41845200 |
| H | -3.27334800 | -3.01037000 | -1.44978100 |
| H | -3.55762700 | -3.60854900 | 0.18880200  |
| H | 0.61101500  | -0.28292400 | 4.77586200  |
| C | 0.45364800  | -0.69153500 | 3.77315800  |
| O | 0.43016600  | 0.06757000  | 2.78957600  |
| O | 0.30309900  | -1.97735700 | 3.72828300  |
| H | 0.29151600  | -2.33959300 | 1.38774000  |
| H | 0.22638100  | -2.21189300 | 2.70788600  |
| C | -4.76129000 | -1.87877500 | -0.31835500 |
| H | -4.89287100 | -1.55338500 | 0.71989500  |
| H | -4.65671800 | -0.96717700 | -0.92118300 |
| C | -5.99578600 | -2.66172400 | -0.78021400 |
| H | -6.09305600 | -3.57706300 | -0.17842800 |
| H | -5.85150500 | -2.99570600 | -1.81795900 |
| C | -7.29657600 | -1.85410600 | -0.68616400 |
| H | -7.44024300 | -1.52171200 | 0.35086400  |
| H | -7.19739800 | -0.93929300 | -1.28597700 |
| C | -8.52931700 | -2.63796800 | -1.14768600 |
| H | -8.67457200 | -3.54062500 | -0.54304300 |
| H | -9.44033400 | -2.03550600 | -1.06887600 |
| H | -8.42964700 | -2.95454700 | -2.19239000 |

TSIVhex

Zero-point = -2888.345428

|    |            |             |             |
|----|------------|-------------|-------------|
| Ru | 0.46242900 | -0.83275400 | -0.48340000 |
| P  | 0.36854300 | 1.52430700  | -0.45944600 |

|   |             |             |             |
|---|-------------|-------------|-------------|
| P | -1.71746500 | -1.01679500 | 0.10010100  |
| C | -2.85486700 | 0.21772200  | -0.72229400 |
| H | -2.80925600 | -0.05104600 | -1.78301600 |
| H | -3.86818000 | -0.00657100 | -0.37545000 |
| C | -1.22180800 | 2.14844500  | -1.21975800 |
| C | -2.58735700 | 1.74183200  | -0.59377800 |
| C | -3.65905400 | 2.48592800  | -1.45426400 |
| H | -3.60140000 | 3.56107100  | -1.24649200 |
| H | -3.45553800 | 2.35784500  | -2.52782200 |
| P | -5.41856800 | 1.98945400  | -1.24559400 |
| H | -6.06354400 | 2.99122000  | -2.02235000 |
| H | -5.53399400 | 0.87058100  | -2.11329900 |
| O | -5.95565200 | 1.78291900  | 0.14043500  |
| H | -1.16840100 | 3.24093900  | -1.28681600 |
| H | -1.17684000 | 1.77298700  | -2.24916400 |
| C | -2.72451700 | 2.23005200  | 0.86202600  |
| H | -2.00902100 | 1.74318900  | 1.52537300  |
| H | -2.54177900 | 3.30797200  | 0.91986700  |
| H | -3.73121500 | 2.03268100  | 1.23741600  |
| C | -2.16881900 | -0.97047600 | 1.88561000  |
| C | -3.49957100 | -0.80783600 | 2.31780200  |
| C | -1.15468000 | -1.14428800 | 2.84332900  |
| C | -3.80241700 | -0.80519100 | 3.67912500  |
| H | -4.30275100 | -0.67482700 | 1.60227300  |
| C | -1.46789400 | -1.14718200 | 4.20653600  |
| H | -0.12930800 | -1.27391400 | 2.51868100  |
| C | -2.78723000 | -0.97469800 | 4.62586800  |
| H | -4.82891800 | -0.66860800 | 3.99926900  |
| H | -0.67769500 | -1.28359500 | 4.93659900  |
| H | -3.02700800 | -0.97200300 | 5.68310700  |
| C | -2.55153800 | -2.58355900 | -0.44357000 |
| C | -2.85867800 | -2.79964500 | -1.80235800 |
| C | -2.81331200 | -3.61519300 | 0.47581200  |
| C | -3.42391700 | -4.00660800 | -2.22050200 |
| H | -2.63244600 | -2.03677500 | -2.53802300 |
| C | -3.37248900 | -4.82211600 | 0.05082600  |
| H | -2.58562900 | -3.47114400 | 1.52471500  |
| C | -3.68330100 | -5.02045500 | -1.29591100 |
| H | -3.65734700 | -4.15386600 | -3.26922300 |
| H | -3.57012000 | -5.60438800 | 0.77500600  |
| H | -4.12246500 | -5.95611100 | -1.62218400 |
| C | 0.59722200  | 2.57462700  | 1.04022300  |
| C | 0.32258700  | 3.95687800  | 1.04136700  |
| C | 1.06380400  | 1.97684300  | 2.22347200  |
| C | 0.50452900  | 4.71621000  | 2.19729100  |
| H | -0.02899700 | 4.44412800  | 0.13895000  |
| C | 1.24371900  | 2.74286000  | 3.37953200  |
| H | 1.28311400  | 0.91575200  | 2.23046900  |

|   |             |             |             |
|---|-------------|-------------|-------------|
| C | 0.96360700  | 4.10925500  | 3.37027600  |
| H | 0.28714200  | 5.77833600  | 2.18442600  |
| H | 1.59994800  | 2.26725800  | 4.28649000  |
| H | 1.10028200  | 4.70028100  | 4.26859100  |
| C | 1.58663500  | 2.23121000  | -1.66038300 |
| C | 1.71236600  | 1.58829000  | -2.90884900 |
| C | 2.39732500  | 3.34393900  | -1.38342700 |
| C | 2.60875700  | 2.07256300  | -3.86167000 |
| H | 1.13855700  | 0.69017300  | -3.11443600 |
| C | 3.29811500  | 3.81781800  | -2.34143900 |
| H | 2.33512100  | 3.83602400  | -0.42143900 |
| C | 3.40121500  | 3.18927800  | -3.58286300 |
| H | 2.69983700  | 1.56417600  | -4.81506600 |
| H | 3.92060300  | 4.67568600  | -2.11229300 |
| H | 4.10247200  | 3.55801300  | -4.32288800 |
| C | 2.75608400  | -0.97991000 | 0.66453100  |
| O | 1.65407800  | -1.01709600 | 1.32232200  |
| O | 2.70776800  | -0.84635700 | -0.59129200 |
| C | 4.07095100  | -1.05137200 | 1.41079500  |
| H | 3.91351800  | -1.64394800 | 2.31884800  |
| H | 4.30006200  | -0.02947100 | 1.74747300  |
| C | 0.30248700  | -2.25760200 | -2.27093600 |
| O | 1.50034400  | -2.54658700 | -2.88040600 |
| O | -0.17159900 | -1.07923300 | -2.52221100 |
| H | -0.40404100 | -3.09814600 | -2.24890200 |
| H | 1.81991100  | -3.40142500 | -2.55858000 |
| H | 0.56973500  | -2.49519200 | -0.73004400 |
| C | 5.23505800  | -1.59730000 | 0.57639900  |
| H | 5.31116000  | -1.01430700 | -0.34773700 |
| H | 5.00656500  | -2.62642800 | 0.26894900  |
| C | 6.57065800  | -1.57153000 | 1.32884300  |
| H | 6.48013700  | -2.14679900 | 2.26191900  |
| H | 6.79793000  | -0.53890000 | 1.63163500  |
| C | 7.74167600  | -2.12486100 | 0.50691500  |
| H | 7.51568800  | -3.15702600 | 0.20629400  |
| H | 7.83016000  | -1.55097700 | -0.42529900 |
| C | 9.07671500  | -2.09197600 | 1.25762900  |
| H | 9.02905700  | -2.68544300 | 2.17804400  |
| H | 9.89112700  | -2.49351000 | 0.64557900  |
| H | 9.34735200  | -1.06806400 | 1.54021300  |

Vhex

Zero-point = -2888.361105

|    |             |             |             |
|----|-------------|-------------|-------------|
| Ru | 0.53666100  | -0.63957700 | -0.38713200 |
| P  | 0.17110700  | 1.57375200  | -0.41719100 |
| P  | -1.62924300 | -1.08664700 | 0.08084400  |
| C  | -2.87919600 | -0.01934400 | -0.79909400 |
| H  | -2.76851700 | -0.30698700 | -1.85040500 |

|   |             |             |             |
|---|-------------|-------------|-------------|
| H | -3.87103700 | -0.35200500 | -0.47841200 |
| C | -1.42960400 | 2.04871800  | -1.25400200 |
| C | -2.78080100 | 1.52497000  | -0.69182500 |
| C | -3.87629700 | 2.14118700  | -1.61931100 |
| H | -3.94043900 | 3.21984700  | -1.43285200 |
| H | -3.60794300 | 2.01556800  | -2.67865900 |
| P | -5.58168500 | 1.46273200  | -1.47726300 |
| H | -6.29636400 | 2.38028700  | -2.29533100 |
| H | -5.53901500 | 0.32712900  | -2.32901900 |
| O | -6.14929600 | 1.21707800  | -0.10969000 |
| H | -1.46386100 | 3.14212300  | -1.31878200 |
| H | -1.30089200 | 1.67979800  | -2.27837700 |
| C | -3.03853900 | 2.02205500  | 0.74479900  |
| H | -2.31685800 | 1.61636900  | 1.45453300  |
| H | -2.96031300 | 3.11330700  | 0.78838000  |
| H | -4.04115200 | 1.73773100  | 1.07196900  |
| C | -2.15485600 | -1.11016200 | 1.84649100  |
| C | -3.50555000 | -1.04603900 | 2.23967700  |
| C | -1.16193900 | -1.24638500 | 2.83317900  |
| C | -3.84927900 | -1.10341800 | 3.59064100  |
| H | -4.29428500 | -0.94226200 | 1.50367300  |
| C | -1.51490600 | -1.31110900 | 4.18443000  |
| H | -0.11980100 | -1.29949700 | 2.53980400  |
| C | -2.85541200 | -1.23630000 | 4.56486600  |
| H | -4.89186700 | -1.04264900 | 3.88070300  |
| H | -0.74041200 | -1.41903400 | 4.93569900  |
| H | -3.12731100 | -1.28117800 | 5.61328800  |
| C | -2.19992500 | -2.74852800 | -0.50833700 |
| C | -2.26217200 | -3.01062500 | -1.89262100 |
| C | -2.53367100 | -3.77576100 | 0.39065300  |
| C | -2.66350700 | -4.26385800 | -2.35705600 |
| H | -1.95770100 | -2.24573000 | -2.59796500 |
| C | -2.92695700 | -5.03043200 | -0.08214000 |
| H | -2.49377400 | -3.59458500 | 1.45725800  |
| C | -2.99762600 | -5.27647500 | -1.45392600 |
| H | -2.70737300 | -4.45100800 | -3.42424700 |
| H | -3.18187100 | -5.81220300 | 0.62439100  |
| H | -3.30622700 | -6.24979500 | -1.81752300 |
| C | 0.23166100  | 2.62275900  | 1.09817900  |
| C | -0.13833900 | 3.98249100  | 1.07495500  |
| C | 0.66244800  | 2.05736000  | 2.30960900  |
| C | -0.08998000 | 4.74983200  | 2.23855500  |
| H | -0.45585500 | 4.44623000  | 0.14777600  |
| C | 0.70779500  | 2.83161900  | 3.47344400  |
| H | 0.96713700  | 1.01822800  | 2.33234500  |
| C | 0.32947300  | 4.17375000  | 3.44178900  |
| H | -0.37912700 | 5.79425800  | 2.20793400  |
| H | 1.03771100  | 2.38132500  | 4.40286300  |

|   |            |             |             |
|---|------------|-------------|-------------|
| H | 0.36176500 | 4.77078000  | 4.34587300  |
| C | 1.38274100 | 2.38887000  | -1.55047200 |
| C | 1.54096400 | 1.83815400  | -2.83901500 |
| C | 2.16652100 | 3.49255900  | -1.17743200 |
| C | 2.44836900 | 2.40291800  | -3.73559800 |
| H | 0.99072600 | 0.94267600  | -3.11356600 |
| C | 3.07702400 | 4.04766600  | -2.08109100 |
| H | 2.07154100 | 3.91699900  | -0.18618100 |
| C | 3.21580400 | 3.50948100  | -3.36100400 |
| H | 2.56571400 | 1.96758000  | -4.72177400 |
| H | 3.67827900 | 4.89844600  | -1.78039700 |
| H | 3.92410000 | 3.94173100  | -4.05866500 |
| C | 2.84703400 | -0.70436200 | 0.76510200  |
| O | 1.76966600 | -0.81179800 | 1.44275200  |
| O | 2.76472600 | -0.49724100 | -0.48988300 |
| C | 4.18947000 | -0.78236900 | 1.45620200  |
| H | 4.05535600 | -1.33492600 | 2.39187700  |
| H | 4.46050400 | 0.24588500  | 1.73734100  |
| C | 0.86558600 | -2.17081900 | -2.27977900 |
| O | 2.17401600 | -2.16387300 | -2.77608700 |
| O | 0.16064100 | -1.01403600 | -2.40117500 |
| H | 0.36087200 | -3.04140300 | -2.72289800 |
| H | 2.65107800 | -1.46007900 | -2.30531300 |
| H | 0.91434900 | -2.47243000 | -1.13972500 |
| C | 5.30251800 | -1.39300700 | 0.59485100  |
| H | 5.37232100 | -0.83207800 | -0.34352400 |
| H | 5.02420300 | -2.41879600 | 0.31944800  |
| C | 6.66267900 | -1.40316300 | 1.30238400  |
| H | 6.58118700 | -1.95657300 | 2.24923300  |
| H | 6.93865500 | -0.37426900 | 1.57613800  |
| C | 7.78286000 | -2.01754400 | 0.45337100  |
| H | 7.86266800 | -1.46478600 | -0.49232000 |
| H | 7.50665600 | -3.04502500 | 0.18061300  |
| C | 9.14226300 | -2.02361100 | 1.15965500  |
| H | 9.10227200 | -2.59831800 | 2.09221900  |
| H | 9.91920700 | -2.46807100 | 0.52900300  |
| H | 9.46199800 | -1.00629900 | 1.41344500  |

Vlhex

Zero-point = -2889.533494

|    |             |             |             |
|----|-------------|-------------|-------------|
| Ru | 0.30711900  | -1.04954900 | -0.29461400 |
| P  | 0.50456300  | 1.22707300  | -0.58387600 |
| P  | -1.88873600 | -0.86843200 | 0.23752800  |
| C  | -2.83936800 | 0.37657100  | -0.77283300 |
| H  | -2.81123200 | -0.05894100 | -1.77731100 |
| H  | -3.87678300 | 0.33632800  | -0.42689600 |
| C  | -0.94917800 | 1.96819400  | -1.48037000 |
| C  | -2.36952500 | 1.85347900  | -0.85708900 |

|   |             |             |             |
|---|-------------|-------------|-------------|
| C | -3.31076200 | 2.59343500  | -1.86118200 |
| H | -3.11183900 | 3.67075700  | -1.81376800 |
| H | -3.10773900 | 2.27528200  | -2.89423700 |
| P | -5.12390400 | 2.36493200  | -1.64012700 |
| H | -5.62330400 | 3.32347300  | -2.56421000 |
| H | -5.37785700 | 1.15960800  | -2.34645400 |
| O | -5.69564900 | 2.42703500  | -0.25326900 |
| H | -0.72287900 | 3.02208000  | -1.67644800 |
| H | -0.94497900 | 1.44260800  | -2.44018000 |
| C | -2.46716100 | 2.57644900  | 0.50130900  |
| H | -1.86540700 | 2.09061700  | 1.26956800  |
| H | -2.10703500 | 3.60644900  | 0.40862900  |
| H | -3.50411800 | 2.60613200  | 0.84328800  |
| C | -2.33417700 | -0.54918100 | 1.99632800  |
| C | -3.58575600 | -0.03600200 | 2.38817500  |
| C | -1.39800700 | -0.89438500 | 2.98797600  |
| C | -3.88476900 | 0.13581400  | 3.74066800  |
| H | -4.32846600 | 0.24185400  | 1.64923400  |
| C | -1.70726900 | -0.72611000 | 4.34053400  |
| H | -0.42991600 | -1.28606700 | 2.69648600  |
| C | -2.94765600 | -0.20967500 | 4.71852500  |
| H | -4.84840900 | 0.54028200  | 4.02819400  |
| H | -0.97757300 | -0.99865200 | 5.09506500  |
| H | -3.18502800 | -0.07576100 | 5.76775600  |
| C | -2.89980300 | -2.36888800 | -0.14829100 |
| C | -2.87734800 | -2.85716700 | -1.46953900 |
| C | -3.65856100 | -3.04979500 | 0.81686400  |
| C | -3.60560900 | -3.99548300 | -1.81428300 |
| H | -2.26941400 | -2.34838100 | -2.20855400 |
| C | -4.38156800 | -4.19365100 | 0.46550200  |
| H | -3.68872200 | -2.68861400 | 1.83686800  |
| C | -4.35906900 | -4.66701700 | -0.84697300 |
| H | -3.57740200 | -4.36270700 | -2.83414900 |
| H | -4.96249900 | -4.71176700 | 1.22016600  |
| H | -4.92066000 | -5.55464700 | -1.11470700 |
| C | 0.81436800  | 2.37094600  | 0.82485500  |
| C | 0.88334300  | 3.76414400  | 0.62303400  |
| C | 0.96483000  | 1.86348800  | 2.12510100  |
| C | 1.08047800  | 4.62591800  | 1.70087100  |
| H | 0.79632400  | 4.17313400  | -0.37759100 |
| C | 1.16150200  | 2.73341000  | 3.20285400  |
| H | 0.94144200  | 0.79332300  | 2.28412000  |
| C | 1.21451400  | 4.11135100  | 2.99486700  |
| H | 1.13021200  | 5.69593400  | 1.53382900  |
| H | 1.27001400  | 2.32913700  | 4.20292300  |
| H | 1.36292800  | 4.78358300  | 3.83212200  |
| C | 1.88865500  | 1.62950500  | -1.73928600 |
| C | 1.81357400  | 1.20176400  | -3.07904500 |



|   |             |             |             |
|---|-------------|-------------|-------------|
| C | 3.05286800  | 2.28204300  | -1.29927600 |
| C | 2.87179500  | 1.44163700  | -3.95612200 |
| H | 0.94434400  | 0.64563500  | -3.40800500 |
| C | 4.11120800  | 2.51223400  | -2.18186300 |
| H | 3.13354300  | 2.61349600  | -0.27170100 |
| C | 4.02252600  | 2.09767100  | -3.51141800 |
| H | 2.80048800  | 1.10715500  | -4.98522400 |
| H | 5.00338300  | 3.01629600  | -1.82748200 |
| H | 4.84481200  | 2.27850600  | -4.19417100 |
| C | 2.60172700  | -1.34974900 | 0.85889500  |
| O | 1.52395100  | -1.19821500 | 1.53288100  |
| O | 2.54418300  | -1.30078700 | -0.40771600 |
| C | 3.90724000  | -1.60290600 | 1.58127200  |
| H | 3.89588600  | -2.65462600 | 1.90166400  |
| H | 3.89648500  | -1.01029800 | 2.50342900  |
| C | 0.18426300  | -2.00173400 | -3.15308900 |
| O | 1.29558100  | -2.74014400 | -2.64704700 |
| O | -0.26950500 | -0.98629600 | -2.33198200 |
| H | 0.44807200  | -1.56519200 | -4.13702300 |
| H | 1.97269800  | -2.10636800 | -2.36115500 |
| H | -0.57436900 | -2.78711000 | -3.32863400 |
| H | 0.07974600  | -2.84456400 | 0.07667400  |
| H | 0.40459800  | -2.86834000 | -0.65130900 |
| C | 5.15907300  | -1.31688600 | 0.74532100  |
| H | 5.12446100  | -1.92206900 | -0.16739500 |
| H | 5.14034100  | -0.27131800 | 0.41258600  |
| C | 6.45861200  | -1.59569000 | 1.50990800  |
| H | 6.47045200  | -2.64449700 | 1.84082300  |
| H | 6.48340500  | -0.98963400 | 2.42744600  |
| C | 7.72070000  | -1.31340100 | 0.68494900  |
| H | 7.69563500  | -1.91945500 | -0.23064600 |
| H | 7.70858600  | -0.26585300 | 0.35438400  |
| C | 9.01837400  | -1.59378800 | 1.44941900  |
| H | 9.07533700  | -2.64274600 | 1.76225600  |
| H | 9.89959900  | -1.38264800 | 0.83465000  |
| H | 9.08785600  | -0.97689200 | 2.35289300  |

TSVIhex

Zero-point = -2889.511463

|    |             |             |             |
|----|-------------|-------------|-------------|
| Ru | 0.31607700  | -0.99663500 | -0.39617900 |
| P  | 0.56891100  | 1.34398300  | -0.51452300 |
| P  | -1.86258200 | -0.84595600 | 0.13932700  |
| C  | -2.79938600 | 0.51400300  | -0.73127000 |
| H  | -2.76747600 | 0.21816700  | -1.78639600 |
| H  | -3.84075100 | 0.45405800  | -0.39943000 |
| C  | -0.91578800 | 2.19041300  | -1.27378800 |
| C  | -2.31830700 | 1.98718100  | -0.62903300 |
| C  | -3.27858300 | 2.86572000  | -1.49503200 |

|   |             |             |             |
|---|-------------|-------------|-------------|
| H | -3.06466200 | 3.92382900  | -1.30263700 |
| H | -3.10131300 | 2.69617700  | -2.56769500 |
| P | -5.09075300 | 2.63608000  | -1.28245800 |
| H | -5.58100900 | 3.70143500  | -2.08757500 |
| H | -5.36482600 | 1.52649800  | -2.12837700 |
| O | -5.65991800 | 2.54025700  | 0.10206900  |
| H | -0.70832000 | 3.26384000  | -1.34509300 |
| H | -0.94275000 | 1.80679600  | -2.30011600 |
| C | -2.37538200 | 2.50771300  | 0.82074700  |
| H | -1.73108300 | 1.93223100  | 1.48597100  |
| H | -2.04157800 | 3.54953600  | 0.86447300  |
| H | -3.39724100 | 2.45687600  | 1.20414500  |
| C | -2.35043000 | -0.71487200 | 1.91469800  |
| C | -3.66996800 | -0.43197700 | 2.31300600  |
| C | -1.37613500 | -0.96373800 | 2.89633300  |
| C | -3.99996300 | -0.37929900 | 3.66690800  |
| H | -4.44269200 | -0.24689800 | 1.57530900  |
| C | -1.71643800 | -0.91780400 | 4.25202000  |
| H | -0.36100000 | -1.19523900 | 2.59447800  |
| C | -3.02382400 | -0.62157700 | 4.63865000  |
| H | -5.01720500 | -0.14962700 | 3.96262700  |
| H | -0.95803700 | -1.11443300 | 5.00199500  |
| H | -3.28501600 | -0.58139900 | 5.69005600  |
| C | -2.88992100 | -2.31739200 | -0.35047100 |
| C | -3.90339200 | -2.29487500 | -1.32218500 |
| C | -2.59596100 | -3.54194500 | 0.28273100  |
| C | -4.59858200 | -3.46326400 | -1.65597500 |
| H | -4.16652700 | -1.37450400 | -1.82678100 |
| C | -3.29273400 | -4.70186900 | -0.04800300 |
| H | -1.80969900 | -3.58128200 | 1.02858900  |
| C | -4.29620100 | -4.66708600 | -1.02219100 |
| H | -5.37803000 | -3.42527800 | -2.40891100 |
| H | -3.05267200 | -5.63353100 | 0.45186300  |
| H | -4.83595000 | -5.57065500 | -1.28095100 |
| C | 0.93824800  | 2.38710000  | 0.96495400  |
| C | 0.94121800  | 3.79484500  | 0.89841800  |
| C | 1.21100200  | 1.76813000  | 2.19579400  |
| C | 1.19460100  | 4.55941500  | 2.03681300  |
| H | 0.75764800  | 4.29468200  | -0.04622500 |
| C | 1.46459300  | 2.53938300  | 3.33501000  |
| H | 1.23197700  | 0.68712600  | 2.25176800  |
| C | 1.45247700  | 3.93191000  | 3.25992500  |
| H | 1.19130400  | 5.64171600  | 1.97159100  |
| H | 1.66862100  | 2.04755300  | 4.27956500  |
| H | 1.64459600  | 4.52771400  | 4.14489100  |
| C | 1.88601300  | 1.88018400  | -1.70420600 |
| C | 1.80436400  | 1.42913000  | -3.03750000 |
| C | 2.99441000  | 2.65380300  | -1.32101400 |

|   |             |             |             |
|---|-------------|-------------|-------------|
| C | 2.79057200  | 1.77284900  | -3.96232400 |
| H | 0.99126400  | 0.77376800  | -3.32905700 |
| C | 3.98408600  | 2.98569300  | -2.25079000 |
| H | 3.08585800  | 2.99999400  | -0.29957200 |
| C | 3.88214800  | 2.55426300  | -3.57348000 |
| H | 2.71235300  | 1.42112600  | -4.98548400 |
| H | 4.83331900  | 3.58282100  | -1.93743500 |
| H | 4.64939600  | 2.81617500  | -4.29316400 |
| C | 2.59364200  | -1.50090600 | 0.67911900  |
| O | 1.54811000  | -1.28255600 | 1.38057600  |
| O | 2.51393800  | -1.40915400 | -0.58669100 |
| C | 3.88831700  | -1.89182200 | 1.35787000  |
| H | 3.89731800  | -2.98981800 | 1.42202800  |
| H | 3.85409700  | -1.52430300 | 2.38890100  |
| C | -0.37478200 | -2.13638300 | -3.01669100 |
| O | 0.83749700  | -3.17447500 | -2.46366800 |
| O | -0.20168100 | -0.96390500 | -2.49206700 |
| H | -0.21400800 | -2.20861000 | -4.10118300 |
| H | 1.67067900  | -2.67396000 | -2.55886300 |
| H | -1.20866000 | -2.75841100 | -2.66403000 |
| H | 0.60328400  | -2.98969900 | -1.39476900 |
| H | 0.17146400  | -2.69610200 | -0.32534600 |
| C | 5.14627200  | -1.40366900 | 0.62844900  |
| H | 5.11935700  | -1.76514600 | -0.40539200 |
| H | 5.12538300  | -0.30777200 | 0.56629300  |
| C | 6.44297100  | -1.85645200 | 1.30975700  |
| H | 6.45754300  | -1.49772200 | 2.34927500  |
| H | 6.45981700  | -2.95460900 | 1.36935100  |
| C | 7.70809200  | -1.37074200 | 0.59093100  |
| H | 7.69267600  | -1.72898000 | -0.44729800 |
| H | 7.69094200  | -0.27396700 | 0.53227400  |
| C | 9.00310300  | -1.82652300 | 1.27078700  |
| H | 9.88658100  | -1.46412700 | 0.73481300  |
| H | 9.06297300  | -1.45419200 | 2.30003100  |
| H | 9.06534300  | -2.92008300 | 1.31263500  |

TSVIhex at T=160°C

Zero-point = -2889.511463

|    |             |             |             |
|----|-------------|-------------|-------------|
| Ru | 0.31607700  | -0.99663500 | -0.39617900 |
| P  | 0.56891100  | 1.34398300  | -0.51452300 |
| P  | -1.86258200 | -0.84595600 | 0.13932700  |
| C  | -2.79938600 | 0.51400300  | -0.73127000 |
| H  | -2.76747600 | 0.21816700  | -1.78639600 |
| H  | -3.84075100 | 0.45405800  | -0.39943000 |
| C  | -0.91578800 | 2.19041300  | -1.27378800 |
| C  | -2.31830700 | 1.98718100  | -0.62903300 |
| C  | -3.27858300 | 2.86572000  | -1.49503200 |
| H  | -3.06466200 | 3.92382900  | -1.30263700 |

|   |             |             |             |
|---|-------------|-------------|-------------|
| H | -3.10131300 | 2.69617700  | -2.56769500 |
| P | -5.09075300 | 2.63608000  | -1.28245800 |
| H | -5.58100900 | 3.70143500  | -2.08757500 |
| H | -5.36482600 | 1.52649800  | -2.12837700 |
| O | -5.65991800 | 2.54025700  | 0.10206900  |
| H | -0.70832000 | 3.26384000  | -1.34509300 |
| H | -0.94275000 | 1.80679600  | -2.30011600 |
| C | -2.37538200 | 2.50771300  | 0.82074700  |
| H | -1.73108300 | 1.93223100  | 1.48597100  |
| H | -2.04157800 | 3.54953600  | 0.86447300  |
| H | -3.39724100 | 2.45687600  | 1.20414500  |
| C | -2.35043000 | -0.71487200 | 1.91469800  |
| C | -3.66996800 | -0.43197700 | 2.31300600  |
| C | -1.37613500 | -0.96373800 | 2.89633300  |
| C | -3.99996300 | -0.37929900 | 3.66690800  |
| H | -4.44269200 | -0.24689800 | 1.57530900  |
| C | -1.71643800 | -0.91780400 | 4.25202000  |
| H | -0.36100000 | -1.19523900 | 2.59447800  |
| C | -3.02382400 | -0.62157700 | 4.63865000  |
| H | -5.01720500 | -0.14962700 | 3.96262700  |
| H | -0.95803700 | -1.11443300 | 5.00199500  |
| H | -3.28501600 | -0.58139900 | 5.69005600  |
| C | -2.88992100 | -2.31739200 | -0.35047100 |
| C | -3.90339200 | -2.29487500 | -1.32218500 |
| C | -2.59596100 | -3.54194500 | 0.28273100  |
| C | -4.59858200 | -3.46326400 | -1.65597500 |
| H | -4.16652700 | -1.37450400 | -1.82678100 |
| C | -3.29273400 | -4.70186900 | -0.04800300 |
| H | -1.80969900 | -3.58128200 | 1.02858900  |
| C | -4.29620100 | -4.66708600 | -1.02219100 |
| H | -5.37803000 | -3.42527800 | -2.40891100 |
| H | -3.05267200 | -5.63353100 | 0.45186300  |
| H | -4.83595000 | -5.57065500 | -1.28095100 |
| C | 0.93824800  | 2.38710000  | 0.96495400  |
| C | 0.94121800  | 3.79484500  | 0.89841800  |
| C | 1.21100200  | 1.76813000  | 2.19579400  |
| C | 1.19460100  | 4.55941500  | 2.03681300  |
| H | 0.75764800  | 4.29468200  | -0.04622500 |
| C | 1.46459300  | 2.53938300  | 3.33501000  |
| H | 1.23197700  | 0.68712600  | 2.25176800  |
| C | 1.45247700  | 3.93191000  | 3.25992500  |
| H | 1.19130400  | 5.64171600  | 1.97159100  |
| H | 1.66862100  | 2.04755300  | 4.27956500  |
| H | 1.64459600  | 4.52771400  | 4.14489100  |
| C | 1.88601300  | 1.88018400  | -1.70420600 |
| C | 1.80436400  | 1.42913000  | -3.03750000 |
| C | 2.99441000  | 2.65380300  | -1.32101400 |
| C | 2.79057200  | 1.77284900  | -3.96232400 |

|   |             |             |             |
|---|-------------|-------------|-------------|
| H | 0.99126400  | 0.77376800  | -3.32905700 |
| C | 3.98408600  | 2.98569300  | -2.25079000 |
| H | 3.08585800  | 2.99999400  | -0.29957200 |
| C | 3.88214800  | 2.55426300  | -3.57348000 |
| H | 2.71235300  | 1.42112600  | -4.98548400 |
| H | 4.83331900  | 3.58282100  | -1.93743500 |
| H | 4.64939600  | 2.81617500  | -4.29316400 |
| C | 2.59364200  | -1.50090600 | 0.67911900  |
| O | 1.54811000  | -1.28255600 | 1.38057600  |
| O | 2.51393800  | -1.40915400 | -0.58669100 |
| C | 3.88831700  | -1.89182200 | 1.35787000  |
| H | 3.89731800  | -2.98981800 | 1.42202800  |
| H | 3.85409700  | -1.52430300 | 2.38890100  |
| C | -0.37478200 | -2.13638300 | -3.01669100 |
| O | 0.83749700  | -3.17447500 | -2.46366800 |
| O | -0.20168100 | -0.96390500 | -2.49206700 |
| H | -0.21400800 | -2.20861000 | -4.10118300 |
| H | 1.67067900  | -2.67396000 | -2.55886300 |
| H | -1.20866000 | -2.75841100 | -2.66403000 |
| H | 0.60328400  | -2.98969900 | -1.39476900 |
| H | 0.17146400  | -2.69610200 | -0.32534600 |
| C | 5.14627200  | -1.40366900 | 0.62844900  |
| H | 5.11935700  | -1.76514600 | -0.40539200 |
| H | 5.12538300  | -0.30777200 | 0.56629300  |
| C | 6.44297100  | -1.85645200 | 1.30975700  |
| H | 6.45754300  | -1.49772200 | 2.34927500  |
| H | 6.45981700  | -2.95460900 | 1.36935100  |
| C | 7.70809200  | -1.37074200 | 0.59093100  |
| H | 7.69267600  | -1.72898000 | -0.44729800 |
| H | 7.69094200  | -0.27396700 | 0.53227400  |
| C | 9.00310300  | -1.82652300 | 1.27078700  |
| H | 9.88658100  | -1.46412700 | 0.73481300  |
| H | 9.06297300  | -1.45419200 | 2.30003100  |
| H | 9.06534300  | -2.92008300 | 1.31263500  |

Vllhex

Zero-point = -2889.536809

|    |             |             |             |
|----|-------------|-------------|-------------|
| Ru | 0.00617400  | -1.16830300 | -0.71536300 |
| P  | 0.69050500  | 1.20140600  | -0.48216300 |
| P  | -2.11899100 | -0.77458000 | -0.00794600 |
| C  | -2.80763400 | 0.90205000  | -0.46780400 |
| H  | -2.92000700 | 0.84915100  | -1.55492200 |
| H  | -3.81530500 | 0.93071500  | -0.04373500 |
| C  | -0.71741500 | 2.35687200  | -0.89537000 |
| C  | -2.05797400 | 2.21627200  | -0.11350600 |
| C  | -2.93508300 | 3.40968500  | -0.61488800 |
| H  | -2.52159300 | 4.34586700  | -0.22161300 |
| H  | -2.90568400 | 3.48426100  | -1.71194000 |

|   |             |             |             |
|---|-------------|-------------|-------------|
| P | -4.72658900 | 3.38417900  | -0.18783600 |
| H | -5.10716500 | 4.70016800  | -0.56810300 |
| H | -5.29184700 | 2.62859500  | -1.24916000 |
| O | -5.13400700 | 2.95260700  | 1.19136900  |
| H | -0.35235700 | 3.38522900  | -0.79570700 |
| H | -0.91103100 | 2.18822000  | -1.95982000 |
| C | -1.85698900 | 2.38290100  | 1.40551900  |
| H | -1.27700400 | 1.56402700  | 1.83259600  |
| H | -1.31516600 | 3.31058900  | 1.61715400  |
| H | -2.82099500 | 2.42111200  | 1.91704500  |
| C | -2.46985600 | -0.97779000 | 1.78715000  |
| C | -3.60164900 | -0.41264200 | 2.40724700  |
| C | -1.59319100 | -1.76717900 | 2.55349300  |
| C | -3.84077400 | -0.62877300 | 3.76478300  |
| H | -4.29331200 | 0.20935200  | 1.85110600  |
| C | -1.84418200 | -1.98354200 | 3.91167300  |
| H | -0.71529500 | -2.19816000 | 2.08801400  |
| C | -2.96469500 | -1.41507300 | 4.51870400  |
| H | -4.70969700 | -0.17955700 | 4.23156000  |
| H | -1.16156900 | -2.59538300 | 4.49091200  |
| H | -3.15570500 | -1.58038100 | 5.57291800  |
| C | -3.43045900 | -1.82599500 | -0.78438400 |
| C | -3.71642400 | -1.68737200 | -2.15755500 |
| C | -4.11645400 | -2.80498000 | -0.04668800 |
| C | -4.67121400 | -2.50215800 | -2.76746900 |
| H | -3.17181600 | -0.96168900 | -2.75101700 |
| C | -5.06811600 | -3.61999000 | -0.66451500 |
| H | -3.91067300 | -2.92840800 | 1.00902900  |
| C | -5.35057700 | -3.46949100 | -2.02293000 |
| H | -4.88006300 | -2.38424800 | -3.82502300 |
| H | -5.58978000 | -4.36976000 | -0.08058100 |
| H | -6.09143400 | -4.10156200 | -2.49872200 |
| C | 1.39337800  | 1.90875600  | 1.06673500  |
| C | 1.71430300  | 3.27669100  | 1.17174100  |
| C | 1.58964200  | 1.07678400  | 2.18187100  |
| C | 2.20989800  | 3.79786600  | 2.36641800  |
| H | 1.58964100  | 3.93058100  | 0.31536700  |
| C | 2.08759800  | 1.60524700  | 3.37758900  |
| H | 1.35602000  | 0.02147600  | 2.10871400  |
| C | 2.39453700  | 2.96246500  | 3.47309600  |
| H | 2.45284500  | 4.85216700  | 2.43536400  |
| H | 2.23092800  | 0.95330400  | 4.23184400  |
| H | 2.77732500  | 3.37034700  | 4.40148200  |
| C | 1.94082400  | 1.68700700  | -1.75376300 |
| C | 1.61033500  | 1.57279300  | -3.12001600 |
| C | 3.25217700  | 2.05493700  | -1.40457500 |
| C | 2.56249900  | 1.84374900  | -4.10291400 |
| H | 0.62894500  | 1.21454600  | -3.40622200 |

|   |             |             |             |
|---|-------------|-------------|-------------|
| C | 4.20453400  | 2.31429900  | -2.39542300 |
| H | 3.53424200  | 2.13382300  | -0.36265500 |
| C | 3.86185500  | 2.21555900  | -3.74601800 |
| H | 2.29494800  | 1.74349800  | -5.14865000 |
| H | 5.21311000  | 2.58973900  | -2.10859200 |
| H | 4.60285600  | 2.41276200  | -4.51174700 |
| C | 2.21456800  | -2.06674600 | 0.23918000  |
| O | 1.17174300  | -1.85350200 | 0.95402100  |
| O | 2.14318600  | -1.80227000 | -1.00098000 |
| C | 3.48306000  | -2.58844300 | 0.86567700  |
| H | 3.76796700  | -3.50197600 | 0.32903200  |
| H | 3.26887400  | -2.86007600 | 1.90392600  |
| C | -0.47508800 | -1.77118100 | -2.67659800 |
| O | -0.72877300 | -0.48436700 | -2.60918400 |
| H | 0.46657800  | -2.09609300 | -3.13833900 |
| H | -1.31825500 | -2.46061600 | -2.76936000 |
| H | -0.41166400 | -2.71534700 | -0.68904100 |
| O | 4.42140100  | -1.12991100 | -2.64343200 |
| H | 4.27013200  | -0.17681700 | -2.69204100 |
| H | 3.63012400  | -1.45960900 | -2.18446100 |
| C | 4.64017900  | -1.57057400 | 0.78754500  |
| H | 4.81967300  | -1.31799900 | -0.26373300 |
| H | 4.33699800  | -0.64582400 | 1.29806000  |
| C | 5.92933100  | -2.10446100 | 1.42282200  |
| H | 5.74272800  | -2.37353400 | 2.47298300  |
| H | 6.22272800  | -3.03529600 | 0.91686200  |
| C | 7.09226900  | -1.10653600 | 1.35406700  |
| H | 7.27586000  | -0.84267300 | 0.30438100  |
| H | 6.79853700  | -0.17438000 | 1.85638200  |
| C | 8.38330600  | -1.64043400 | 1.98282700  |
| H | 9.19386600  | -0.90686800 | 1.91863100  |
| H | 8.23851400  | -1.88392200 | 3.04188400  |
| H | 8.72093600  | -2.55298800 | 1.47842100  |

VIIIhex

Zero-point = -2813.125839

|    |             |             |             |
|----|-------------|-------------|-------------|
| Ru | 0.31302000  | -1.04957200 | -0.66435100 |
| P  | 0.64814600  | 1.39871800  | -0.40146100 |
| P  | -1.88286100 | -0.94608200 | -0.08293800 |
| C  | -2.77104600 | 0.60919200  | -0.62091900 |
| H  | -2.79968000 | 0.52772700  | -1.71165600 |
| H  | -3.79910100 | 0.50008400  | -0.26358200 |
| C  | -0.87771000 | 2.33906400  | -0.93208700 |
| C  | -2.24089700 | 2.02083500  | -0.24737700 |
| C  | -3.23560000 | 3.06963800  | -0.84399400 |
| H  | -2.98848600 | 4.06155700  | -0.44752500 |
| H  | -3.13255100 | 3.12886600  | -1.93758300 |
| P  | -5.03368000 | 2.80084000  | -0.55230000 |

|   |             |             |             |
|---|-------------|-------------|-------------|
| H | -5.56156800 | 4.03839600  | -1.01272300 |
| H | -5.40118500 | 1.94340400  | -1.62324800 |
| O | -5.48912100 | 2.35612200  | 0.80746900  |
| H | -0.66948900 | 3.41013600  | -0.83095500 |
| H | -0.96356500 | 2.13250900  | -2.00437200 |
| C | -2.18630300 | 2.23663900  | 1.27784800  |
| H | -1.52599600 | 1.52077200  | 1.76865500  |
| H | -1.80693800 | 3.23789300  | 1.50658000  |
| H | -3.18293900 | 2.13716300  | 1.71323700  |
| C | -2.30877000 | -1.16714400 | 1.69389500  |
| C | -3.55504300 | -0.78448800 | 2.22785700  |
| C | -1.36304500 | -1.77963400 | 2.53564100  |
| C | -3.83969000 | -1.00418600 | 3.57582800  |
| H | -4.30333900 | -0.30226100 | 1.60961000  |
| C | -1.65918500 | -2.00158000 | 3.88397000  |
| H | -0.39921300 | -2.06987400 | 2.13501600  |
| C | -2.89390900 | -1.61389300 | 4.40555800  |
| H | -4.79842200 | -0.69581800 | 3.97647000  |
| H | -0.92229600 | -2.47624400 | 4.52242000  |
| H | -3.12039200 | -1.78284500 | 5.45218900  |
| C | -2.99001800 | -2.18319500 | -0.90454000 |
| C | -3.22385300 | -2.10173200 | -2.29200100 |
| C | -3.56372900 | -3.24428400 | -0.18446400 |
| C | -4.02003900 | -3.05193000 | -2.93310400 |
| H | -2.76025000 | -1.31128100 | -2.87125600 |
| C | -4.35633200 | -4.19433000 | -0.83300000 |
| H | -3.39502300 | -3.32601700 | 0.88186000  |
| C | -4.58980700 | -4.09964600 | -2.20577600 |
| H | -4.19056100 | -2.97576600 | -4.00134400 |
| H | -4.79309400 | -5.00589000 | -0.26205500 |
| H | -5.20778100 | -4.83663400 | -2.70557500 |
| C | 1.10255400  | 2.18490000  | 1.20252900  |
| C | 1.16029600  | 3.58526100  | 1.35010300  |
| C | 1.36709000  | 1.37390700  | 2.31892800  |
| C | 1.46742700  | 4.15601300  | 2.58490500  |
| H | 0.97585100  | 4.22934500  | 0.49731300  |
| C | 1.67331000  | 1.95198600  | 3.55526700  |
| H | 1.33404100  | 0.29609600  | 2.21351700  |
| C | 1.72138100  | 3.33917800  | 3.69154600  |
| H | 1.50793700  | 5.23477500  | 2.68536100  |
| H | 1.86973700  | 1.31430700  | 4.40982900  |
| H | 1.95536500  | 3.78492800  | 4.65148800  |
| C | 1.90129200  | 2.08677200  | -1.57316800 |
| C | 1.74258900  | 1.82708700  | -2.95013100 |
| C | 3.03866900  | 2.79152500  | -1.14396100 |
| C | 2.68412400  | 2.29181900  | -3.86822700 |
| H | 0.90690100  | 1.22328800  | -3.28638000 |
| C | 3.98127300  | 3.24631300  | -2.07020900 |



|   |             |             |             |
|---|-------------|-------------|-------------|
| H | 3.19047300  | 2.98653300  | -0.09025500 |
| C | 3.80389600  | 3.00560900  | -3.43285100 |
| H | 2.54934600  | 2.08374300  | -4.92395000 |
| H | 4.85392900  | 3.78784600  | -1.72237100 |
| H | 4.53617100  | 3.36090700  | -4.14879000 |
| C | 2.56727000  | -1.63557700 | 0.38713600  |
| O | 1.47968800  | -1.54872700 | 1.06997300  |
| O | 2.52062800  | -1.38540100 | -0.84931400 |
| C | 3.84454500  | -2.05310300 | 1.07981800  |
| H | 3.76024500  | -3.13153300 | 1.27654100  |
| H | 3.86294300  | -1.57199800 | 2.06506500  |
| C | 0.02695300  | -1.73660600 | -2.63329400 |
| O | -0.40059000 | -0.49402100 | -2.60871900 |
| H | 1.02855200  | -1.93706100 | -3.03609600 |
| H | -0.70956000 | -2.53438400 | -2.76089200 |
| H | 0.11535100  | -2.63935700 | -0.63256200 |
| C | 5.12031400  | -1.75443600 | 0.28631100  |
| H | 5.04324800  | -2.22270800 | -0.70121100 |
| H | 5.18711800  | -0.67473700 | 0.10249900  |
| C | 6.38876300  | -2.23846900 | 0.99900200  |
| H | 6.45580200  | -1.76942600 | 1.99164100  |
| H | 6.31554400  | -3.32070000 | 1.18113100  |
| C | 7.67427300  | -1.94533500 | 0.21504000  |
| H | 7.60613400  | -2.41334300 | -0.77623600 |
| H | 7.74790800  | -0.86436400 | 0.03429100  |
| C | 8.94082500  | -2.43299500 | 0.92564500  |
| H | 9.83969900  | -2.20906100 | 0.34172100  |
| H | 9.05421900  | -1.95617400 | 1.90617500  |
| H | 8.91190400  | -3.51660300 | 1.08833700  |

TSIIIhex

Zero-point = -2813.120824

|    |             |             |             |
|----|-------------|-------------|-------------|
| Ru | 0.32344700  | -1.05114400 | -0.59496500 |
| P  | 0.60343800  | 1.31401800  | -0.44510700 |
| P  | -1.86758800 | -0.92405600 | -0.00264000 |
| C  | -2.79338800 | 0.54480800  | -0.69640400 |
| H  | -2.81863400 | 0.34739400  | -1.77350900 |
| H  | -3.82175600 | 0.46101900  | -0.33209400 |
| C  | -0.88428900 | 2.22195500  | -1.11973800 |
| C  | -2.27980100 | 1.99217300  | -0.47120000 |
| C  | -3.24086600 | 2.95990800  | -1.23449100 |
| H  | -3.00625600 | 3.99348200  | -0.95325500 |
| H  | -3.09053700 | 2.88327100  | -2.32157700 |
| P  | -5.05051300 | 2.72974500  | -0.98954700 |
| H  | -5.55132500 | 3.88290900  | -1.65436100 |
| H  | -5.37012800 | 1.72064500  | -1.93650000 |
| O  | -5.56921000 | 2.49256300  | 0.39887300  |
| H  | -0.66068500 | 3.29474400  | -1.12095200 |

|   |             |             |             |
|---|-------------|-------------|-------------|
| H | -0.92447700 | 1.91038800  | -2.17005000 |
| C | -2.29444700 | 2.38694500  | 1.01886600  |
| H | -1.65620800 | 1.73838500  | 1.61975000  |
| H | -1.92790600 | 3.41104700  | 1.14371900  |
| H | -3.30997800 | 2.33476900  | 1.41759600  |
| C | -2.27641000 | -0.95115800 | 1.79315200  |
| C | -3.53577000 | -0.55876100 | 2.28765500  |
| C | -1.30455000 | -1.42089000 | 2.69431300  |
| C | -3.80752500 | -0.62493600 | 3.65429400  |
| H | -4.30575400 | -0.19164400 | 1.61898800  |
| C | -1.58722300 | -1.48999400 | 4.06208600  |
| H | -0.33237600 | -1.72328300 | 2.32348600  |
| C | -2.83440100 | -1.09085200 | 4.54367800  |
| H | -4.77711300 | -0.31052100 | 4.02292300  |
| H | -0.83003400 | -1.85549000 | 4.74696000  |
| H | -3.05010500 | -1.14071300 | 5.60492000  |
| C | -2.96735600 | -2.26255000 | -0.66316400 |
| C | -3.19551500 | -2.35460800 | -2.05159000 |
| C | -3.54416100 | -3.22677100 | 0.18062700  |
| C | -3.99182100 | -3.37587500 | -2.57226400 |
| H | -2.71982100 | -1.64731400 | -2.72204100 |
| C | -4.33606100 | -4.24927800 | -0.34795400 |
| H | -3.38077500 | -3.17535000 | 1.24960400  |
| C | -4.56616100 | -4.32439700 | -1.72245200 |
| H | -4.15790300 | -3.43329200 | -3.64239100 |
| H | -4.77565200 | -4.98345800 | 0.31775600  |
| H | -5.18431900 | -5.11652900 | -2.12901100 |
| C | 1.02670000  | 2.22440000  | 1.10039800  |
| C | 1.02164100  | 3.63222900  | 1.16417800  |
| C | 1.35541300  | 1.49442300  | 2.25522200  |
| C | 1.33068900  | 4.28924400  | 2.35505400  |
| H | 0.78290500  | 4.21712300  | 0.28292100  |
| C | 1.66310300  | 2.15886900  | 3.44675700  |
| H | 1.37247100  | 0.41194600  | 2.21200300  |
| C | 1.64928000  | 3.55259700  | 3.50022400  |
| H | 1.32151900  | 5.37278700  | 2.39122500  |
| H | 1.91003000  | 1.58329000  | 4.33176100  |
| H | 1.88460800  | 4.06513900  | 4.42588400  |
| C | 1.89135200  | 1.88019400  | -1.64493400 |
| C | 1.83176400  | 1.35872900  | -2.95384400 |
| C | 2.93225900  | 2.76048500  | -1.30925400 |
| C | 2.77758300  | 1.74026400  | -3.90536200 |
| H | 1.07127600  | 0.62526000  | -3.20611800 |
| C | 3.88067500  | 3.13047400  | -2.26733000 |
| H | 3.00844400  | 3.15347400  | -0.30361800 |
| C | 3.80206600  | 2.62873500  | -3.56671000 |
| H | 2.72291400  | 1.33018700  | -4.90781400 |
| H | 4.68103000  | 3.80891300  | -1.99348600 |

|   |             |             |             |
|---|-------------|-------------|-------------|
| H | 4.53937900  | 2.91750800  | -4.30712800 |
| C | 2.59074800  | -1.60689000 | 0.46854500  |
| O | 1.52466300  | -1.49366900 | 1.17168900  |
| O | 2.52027400  | -1.39226200 | -0.77786000 |
| C | 3.88626900  | -2.01789400 | 1.13287900  |
| H | 3.87562300  | -1.63112600 | 2.15816200  |
| H | 3.86343900  | -3.11374700 | 1.22323800  |
| C | 0.02184100  | -2.27254600 | -2.36352800 |
| O | -0.33921100 | -1.02600500 | -2.62732700 |
| H | 1.01648200  | -2.59602600 | -2.69790200 |
| H | -0.75495400 | -3.04225800 | -2.44709400 |
| H | 0.14940900  | -2.68635400 | -0.80138400 |
| C | 5.14677000  | -1.57927100 | 0.37920500  |
| H | 5.09487000  | -1.95533400 | -0.64836800 |
| H | 5.15746400  | -0.48466400 | 0.29931200  |
| C | 6.43809900  | -2.06080500 | 1.05117300  |
| H | 6.47790300  | -1.68625000 | 2.08456900  |
| H | 6.42261800  | -3.15790500 | 1.12848200  |
| C | 7.70761100  | -1.62575000 | 0.30811900  |
| H | 7.66714000  | -2.00008000 | -0.72365200 |
| H | 7.72300800  | -0.53008600 | 0.23149500  |
| C | 8.99713400  | -2.11008800 | 0.97859000  |
| H | 9.88396100  | -1.78380100 | 0.42523400  |
| H | 9.08232000  | -1.72321600 | 2.00070800  |
| H | 9.02651400  | -3.20424200 | 1.03771000  |

IXhex

Zero-point = -2813.136806

|    |             |             |             |
|----|-------------|-------------|-------------|
| Ru | 0.45261600  | -0.74146700 | -0.58113500 |
| P  | 0.33823400  | 1.43906100  | -0.30068400 |
| P  | -1.71105900 | -1.00386100 | -0.02808800 |
| C  | -2.86798200 | 0.23458700  | -0.79141800 |
| H  | -2.76520400 | 0.02574300  | -1.86225000 |
| H  | -3.88979100 | -0.02594100 | -0.49854300 |
| C  | -1.20266200 | 2.18155000  | -1.04721500 |
| C  | -2.61026000 | 1.74725500  | -0.54587100 |
| C  | -3.61868200 | 2.55100300  | -1.42717700 |
| H  | -3.57165200 | 3.61223000  | -1.15472400 |
| H  | -3.34893600 | 2.48076600  | -2.49108900 |
| P  | -5.38749200 | 2.04881600  | -1.35117400 |
| H  | -5.98773500 | 3.09348500  | -2.10675300 |
| H  | -5.45135100 | 0.97890600  | -2.28246100 |
| O  | -6.00220100 | 1.76952600  | -0.01035000 |
| H  | -1.11697500 | 3.27211400  | -0.98075000 |
| H  | -1.10836300 | 1.90759000  | -2.10279500 |
| C  | -2.84231500 | 2.14782400  | 0.92492100  |
| H  | -2.18385400 | 1.60882500  | 1.60648600  |
| H  | -2.64705600 | 3.21696800  | 1.06025400  |

|   |             |             |             |
|---|-------------|-------------|-------------|
| H | -3.87720300 | 1.95336900  | 1.21531800  |
| C | -2.19853600 | -1.15763700 | 1.74094700  |
| C | -3.50972100 | -0.92791100 | 2.19895600  |
| C | -1.22268700 | -1.59424600 | 2.65567100  |
| C | -3.83036700 | -1.11909600 | 3.54415500  |
| H | -4.28405500 | -0.59211000 | 1.51909600  |
| C | -1.55274600 | -1.78969100 | 3.99927900  |
| H | -0.21096500 | -1.77726900 | 2.31108000  |
| C | -2.85358000 | -1.55024000 | 4.44581000  |
| H | -4.84170500 | -0.93019800 | 3.88539100  |
| H | -0.79227200 | -2.12841600 | 4.69418900  |
| H | -3.10699000 | -1.69829700 | 5.48938000  |
| C | -2.37055700 | -2.57935100 | -0.74375800 |
| C | -2.18607600 | -2.81219900 | -2.12225400 |
| C | -3.01797800 | -3.55477700 | 0.03365300  |
| C | -2.65481700 | -3.99038800 | -2.70503400 |
| H | -1.65898900 | -2.06630300 | -2.70913800 |
| C | -3.47847900 | -4.73374200 | -0.55788500 |
| H | -3.16568500 | -3.39339400 | 1.09371100  |
| C | -3.30056400 | -4.95355500 | -1.92511500 |
| H | -2.50865300 | -4.15886100 | -3.76637900 |
| H | -3.97724000 | -5.47873600 | 0.05182900  |
| H | -3.65906400 | -5.87049900 | -2.37892900 |
| C | 0.50022800  | 2.19790400  | 1.36901100  |
| C | 0.28382000  | 3.57609100  | 1.56748000  |
| C | 0.86328200  | 1.39956000  | 2.46510900  |
| C | 0.40713000  | 4.13440700  | 2.83900100  |
| H | 0.03137000  | 4.21463000  | 0.72826300  |
| C | 0.98475500  | 1.96575400  | 3.73845100  |
| H | 1.06108900  | 0.34585800  | 2.31231700  |
| C | 0.75228800  | 3.32780100  | 3.92850400  |
| H | 0.23578400  | 5.19542400  | 2.98111300  |
| H | 1.26044500  | 1.33838300  | 4.57853600  |
| H | 0.84302300  | 3.76327100  | 4.91698000  |
| C | 1.64479500  | 2.31330900  | -1.26965800 |
| C | 1.64949500  | 2.17173500  | -2.67097500 |
| C | 2.66267600  | 3.06284800  | -0.65621500 |
| C | 2.63714800  | 2.78928800  | -3.43769600 |
| H | 0.89742400  | 1.54763900  | -3.13976200 |
| C | 3.65386500  | 3.67088700  | -1.43074100 |
| H | 2.68024900  | 3.17554700  | 0.42039400  |
| C | 3.64079700  | 3.54078200  | -2.82034800 |
| H | 2.63031700  | 2.67348200  | -4.51585800 |
| H | 4.43466600  | 4.24599700  | -0.94577000 |
| H | 4.41118300  | 4.01461000  | -3.41794200 |
| C | 2.72337600  | -1.47239900 | 0.37721200  |
| O | 1.67989800  | -1.41260700 | 1.11913700  |
| O | 2.64029000  | -1.09846600 | -0.83456400 |

|   |             |             |             |
|---|-------------|-------------|-------------|
| C | 4.01774200  | -2.01620100 | 0.94205900  |
| H | 4.00419100  | -3.10383500 | 0.77940000  |
| H | 4.00091100  | -1.86880400 | 2.02716800  |
| C | 0.68582100  | -1.07769700 | -3.43662400 |
| O | -0.19133600 | -0.44911500 | -2.53250100 |
| H | 1.72517400  | -0.72290800 | -3.34605600 |
| H | 0.35200200  | -0.87275100 | -4.46792000 |
| H | 0.70938900  | -2.17856000 | -3.32551100 |
| C | 5.27730000  | -1.41268800 | 0.30869300  |
| H | 5.22395000  | -1.54349000 | -0.77747100 |
| H | 5.28535400  | -0.32880900 | 0.48373100  |
| C | 6.57087700  | -2.03106500 | 0.85178800  |
| H | 6.60979800  | -1.90583800 | 1.94380500  |
| H | 6.55945400  | -3.11622700 | 0.67276000  |
| C | 7.83815200  | -1.43079000 | 0.22986600  |
| H | 7.84981900  | -0.34717200 | 0.40979900  |
| H | 7.79798000  | -1.55551400 | -0.86060900 |
| C | 9.13002000  | -2.05281200 | 0.76942400  |
| H | 9.16349700  | -3.13057100 | 0.57243800  |
| H | 10.01513400 | -1.60340800 | 0.30711200  |
| H | 9.21463200  | -1.91391700 | 1.85348600  |

Xhex

Zero-point = -2814.310531

|    |             |             |             |
|----|-------------|-------------|-------------|
| Ru | 0.32889300  | -1.04492900 | -0.46965500 |
| P  | 0.53836300  | 1.24855100  | -0.43876900 |
| P  | -1.87708400 | -0.92779500 | 0.05719700  |
| C  | -2.81354000 | 0.44831800  | -0.77736100 |
| H  | -2.76515400 | 0.15965700  | -1.83301800 |
| H  | -3.85692800 | 0.36054800  | -0.45910500 |
| C  | -0.91131100 | 2.11435100  | -1.22533600 |
| C  | -2.33782600 | 1.91901900  | -0.63742300 |
| C  | -3.26530700 | 2.80444600  | -1.53032600 |
| H  | -3.06207900 | 3.86198700  | -1.32349300 |
| H  | -3.05355000 | 2.63998200  | -2.59698300 |
| P  | -5.08139200 | 2.55661800  | -1.36300100 |
| H  | -5.56656200 | 3.64154200  | -2.14403000 |
| H  | -5.33259600 | 1.46758800  | -2.23876200 |
| O  | -5.66908400 | 2.42133600  | 0.01199800  |
| H  | -0.67959400 | 3.18424000  | -1.26865000 |
| H  | -0.90342900 | 1.72824000  | -2.24889400 |
| C  | -2.44490900 | 2.43517400  | 0.81141800  |
| H  | -1.84719500 | 1.84255900  | 1.50428300  |
| H  | -2.08499800 | 3.46761300  | 0.87291700  |
| H  | -3.48401700 | 2.41501400  | 1.14743700  |
| C  | -2.35255600 | -0.87347500 | 1.83519800  |
| C  | -3.60771100 | -0.41921900 | 2.28392700  |
| C  | -1.42836900 | -1.36328400 | 2.77597000  |

|   |             |             |             |
|---|-------------|-------------|-------------|
| C | -3.92299500 | -0.44974300 | 3.64354300  |
| H | -4.33933600 | -0.02893000 | 1.58570800  |
| C | -1.75340000 | -1.39684100 | 4.13459300  |
| H | -0.45620800 | -1.70706700 | 2.43986300  |
| C | -2.99825900 | -0.93948800 | 4.57011000  |
| H | -4.88915200 | -0.08868400 | 3.97684000  |
| H | -1.03245100 | -1.77843000 | 4.84915900  |
| H | -3.24803800 | -0.96179000 | 5.62476300  |
| C | -2.86360300 | -2.36035700 | -0.57451700 |
| C | -2.71687500 | -2.70306900 | -1.93431900 |
| C | -3.72472100 | -3.11901100 | 0.23364700  |
| C | -3.42755300 | -3.77814500 | -2.46812000 |
| H | -2.03169700 | -2.12274500 | -2.54593600 |
| C | -4.42889900 | -4.19837700 | -0.30875700 |
| H | -3.84735000 | -2.86975000 | 1.28008300  |
| C | -4.28424900 | -4.52859300 | -1.65684300 |
| H | -3.30794800 | -4.03410300 | -3.51523600 |
| H | -5.08988100 | -4.77875700 | 0.32514800  |
| H | -4.83200100 | -5.36658400 | -2.07276600 |
| C | 0.84254200  | 2.17285800  | 1.12376200  |
| C | 0.90770800  | 3.58075900  | 1.12816300  |
| C | 0.99463700  | 1.48038200  | 2.33550300  |
| C | 1.10094200  | 4.27594100  | 2.32084000  |
| H | 0.82080800  | 4.13159900  | 0.19801700  |
| C | 1.18784100  | 2.18389600  | 3.52918000  |
| H | 0.97893500  | 0.39808700  | 2.33511700  |
| C | 1.23561900  | 3.57764300  | 3.52559600  |
| H | 1.14750200  | 5.35904400  | 2.31243200  |
| H | 1.29890200  | 1.63781600  | 4.45915600  |
| H | 1.38131200  | 4.12035900  | 4.45253100  |
| C | 1.92308300  | 1.82191700  | -1.51605100 |
| C | 1.83842500  | 1.62943600  | -2.90779200 |
| C | 3.09608900  | 2.37770000  | -0.97717800 |
| C | 2.89438000  | 2.00688600  | -3.73754600 |
| H | 0.96245200  | 1.14839600  | -3.32432500 |
| C | 4.15262300  | 2.74588600  | -1.81352200 |
| H | 3.18340700  | 2.52802100  | 0.09157800  |
| C | 4.05310200  | 2.56693400  | -3.19414100 |
| H | 2.81568900  | 1.85319500  | -4.80810200 |
| H | 5.05142000  | 3.17380900  | -1.38376900 |
| H | 4.87377000  | 2.85534200  | -3.84095700 |
| C | 2.62824500  | -1.53944600 | 0.60562600  |
| O | 1.57149200  | -1.46018300 | 1.32439500  |
| O | 2.53805900  | -1.34569800 | -0.64427100 |
| C | 3.95215300  | -1.88338400 | 1.25595400  |
| H | 3.94151200  | -2.96507800 | 1.45325300  |
| H | 3.97330700  | -1.40159100 | 2.24042000  |
| C | 0.44169900  | -1.48258100 | -3.35058400 |

|   |             |             |             |
|---|-------------|-------------|-------------|
| O | -0.29901100 | -0.71473700 | -2.44321600 |
| H | 1.53174300  | -1.37253800 | -3.22711400 |
| H | 0.19428200  | -1.17835900 | -4.38247500 |
| H | 0.21724700  | -2.56785300 | -3.27617400 |
| H | 0.29540700  | -2.80213900 | -1.03435900 |
| H | 0.10688000  | -2.85025300 | -0.25879900 |
| C | 5.18150800  | -1.50877500 | 0.42178500  |
| H | 5.11063700  | -1.99771800 | -0.55612300 |
| H | 5.16447800  | -0.43057300 | 0.21830200  |
| C | 6.50084800  | -1.88829000 | 1.10460100  |
| H | 6.56157500  | -1.39850200 | 2.08762000  |
| H | 6.51112600  | -2.96964200 | 1.30576000  |
| C | 7.73988800  | -1.51779900 | 0.27958000  |
| H | 7.72987000  | -0.43773900 | 0.07931000  |
| H | 7.67871200  | -2.00725500 | -0.70175600 |
| C | 9.05764600  | -1.89969000 | 0.96122400  |
| H | 9.11194600  | -2.97941400 | 1.14226900  |
| H | 9.92164800  | -1.62226100 | 0.34826200  |
| H | 9.16297600  | -1.39822100 | 1.93031300  |

TSXhex

Zero-point = -2814.280822

|    |             |             |             |
|----|-------------|-------------|-------------|
| Ru | 0.52154700  | -0.79291100 | -0.65714900 |
| P  | 0.42369500  | 1.50982800  | -0.30731000 |
| P  | -1.66281600 | -1.04824800 | -0.07046300 |
| C  | -2.83018500 | 0.27730000  | -0.67774900 |
| H  | -2.86080900 | 0.13650800  | -1.76436100 |
| H  | -3.82518900 | 0.04140000  | -0.28844100 |
| C  | -1.17085900 | 2.24444800  | -0.95133200 |
| C  | -2.53682700 | 1.77258100  | -0.37456200 |
| C  | -3.60178000 | 2.63033800  | -1.13250500 |
| H  | -3.53455600 | 3.66913300  | -0.78802800 |
| H  | -3.39666900 | 2.64070300  | -2.21342500 |
| P  | -5.36746000 | 2.13284200  | -0.99850400 |
| H  | -5.99341700 | 3.22497900  | -1.66021000 |
| H  | -5.48273700 | 1.12569200  | -1.99565200 |
| O  | -5.92248400 | 1.76831300  | 0.34628000  |
| H  | -1.10655000 | 3.33510500  | -0.86739000 |
| H  | -1.13878100 | 2.02149100  | -2.02470300 |
| C  | -2.66904400 | 2.07353900  | 1.13210000  |
| H  | -1.95191300 | 1.50800000  | 1.72774700  |
| H  | -2.48954200 | 3.13587200  | 1.32566200  |
| H  | -3.67485900 | 1.82721500  | 1.48082700  |
| C  | -2.08040900 | -1.22327700 | 1.72356200  |
| C  | -3.41830400 | -1.25210300 | 2.16151200  |
| C  | -1.05092100 | -1.39144100 | 2.66338700  |
| C  | -3.71479700 | -1.41697700 | 3.51351500  |
| H  | -4.23378000 | -1.15215100 | 1.45442300  |

|   |             |             |             |
|---|-------------|-------------|-------------|
| C | -1.35623600 | -1.56445300 | 4.01756200  |
| H | -0.02011800 | -1.39739400 | 2.33456700  |
| C | -2.68345000 | -1.57082600 | 4.44542100  |
| H | -4.74880700 | -1.42769600 | 3.83849200  |
| H | -0.55259800 | -1.69564800 | 4.73385800  |
| H | -2.91737400 | -1.70061400 | 5.49592700  |
| C | -2.51115600 | -2.57598500 | -0.69940400 |
| C | -3.73776600 | -2.58379200 | -1.38388600 |
| C | -1.87739700 | -3.80719600 | -0.44152100 |
| C | -4.30932300 | -3.78863200 | -1.80655900 |
| H | -4.25959400 | -1.65981500 | -1.59704500 |
| C | -2.45257600 | -5.00597900 | -0.85901500 |
| H | -0.92515900 | -3.81972300 | 0.07776600  |
| C | -3.67021400 | -5.00017900 | -1.54614000 |
| H | -5.25514200 | -3.77520800 | -2.33650500 |
| H | -1.94965000 | -5.94365800 | -0.65129300 |
| H | -4.11485500 | -5.93242900 | -1.87442000 |
| C | 0.66850400  | 2.32957900  | 1.32925600  |
| C | 0.35976200  | 3.68817900  | 1.54366000  |
| C | 1.19946300  | 1.58326800  | 2.39496100  |
| C | 0.57036800  | 4.27752200  | 2.79032200  |
| H | -0.04188300 | 4.29147900  | 0.73766400  |
| C | 1.40855800  | 2.17874400  | 3.64271700  |
| H | 1.44323500  | 0.53940900  | 2.24144500  |
| C | 1.09383900  | 3.52245900  | 3.84402900  |
| H | 0.32526900  | 5.32293300  | 2.94031600  |
| H | 1.81471700  | 1.58794000  | 4.45613100  |
| H | 1.25321800  | 3.98118900  | 4.81305000  |
| C | 1.63477700  | 2.39093900  | -1.39530000 |
| C | 1.80093600  | 1.90063800  | -2.70685400 |
| C | 2.39429700  | 3.49695700  | -0.97951200 |
| C | 2.68703000  | 2.52862100  | -3.58325300 |
| H | 1.27235000  | 1.00447000  | -3.01967900 |
| C | 3.28235200  | 4.11599200  | -1.86322500 |
| H | 2.30426600  | 3.86944500  | 0.03257400  |
| C | 3.42556700  | 3.63915400  | -3.16692700 |
| H | 2.81228600  | 2.13684200  | -4.58665600 |
| H | 3.86479600  | 4.96700600  | -1.52794300 |
| H | 4.11721400  | 4.12043800  | -3.84912200 |
| C | 2.80678700  | -1.15225600 | 0.43273000  |
| O | 1.71237500  | -1.27095400 | 1.09590200  |
| O | 2.74089800  | -0.79253200 | -0.77792700 |
| C | 4.12823100  | -1.40726100 | 1.12208300  |
| H | 3.97251800  | -2.19979500 | 1.86274700  |
| H | 4.36767900  | -0.49902200 | 1.69477400  |
| C | -0.93838600 | -1.00033800 | -3.55657300 |
| O | 0.25748100  | -0.88142500 | -2.82037000 |
| H | -0.69639200 | -1.25616600 | -4.59811600 |



|   |             |             |             |
|---|-------------|-------------|-------------|
| H | -1.49527000 | -0.04894600 | -3.57305000 |
| H | -1.60837800 | -1.77869800 | -3.16660300 |
| H | 0.50573300  | -1.95612300 | -2.07125000 |
| H | 0.65833600  | -2.47279300 | -1.25668800 |
| C | 5.27937300  | -1.74523900 | 0.16855500  |
| H | 5.03199500  | -2.66065100 | -0.38408800 |
| H | 5.36288500  | -0.95196800 | -0.58222400 |
| C | 6.61763300  | -1.92662800 | 0.89451600  |
| H | 6.86189900  | -1.00633200 | 1.44524200  |
| H | 6.52157800  | -2.71647000 | 1.65390600  |
| C | 7.77700500  | -2.27223200 | -0.04860700 |
| H | 7.87120500  | -1.48376800 | -0.80736300 |
| H | 7.53358200  | -3.19214400 | -0.59727600 |
| C | 9.11497400  | -2.44807900 | 0.67653900  |
| H | 9.92072200  | -2.69433200 | -0.02289400 |
| H | 9.40272100  | -1.53213200 | 1.20554200  |
| H | 9.06136600  | -3.25333300 | 1.41837700  |

Xlhex

Zero-point = -2814.289143

|    |             |             |             |
|----|-------------|-------------|-------------|
| Ru | -0.12517100 | -0.61780800 | 1.13695500  |
| P  | -0.70879200 | 1.45485500  | 0.04317600  |
| P  | 1.99365800  | -0.68337200 | 0.33151200  |
| C  | 2.73276900  | 0.90672000  | -0.33696600 |
| H  | 3.03557500  | 1.45119600  | 0.56674400  |
| H  | 3.65988300  | 0.62033500  | -0.84089300 |
| C  | 0.74395100  | 2.52358100  | -0.45165400 |
| C  | 1.91076200  | 1.86555000  | -1.24201100 |
| C  | 2.83845800  | 3.05259400  | -1.65684200 |
| H  | 2.33210100  | 3.65003700  | -2.42436200 |
| H  | 3.02694600  | 3.72171000  | -0.80412400 |
| P  | 4.50750400  | 2.62868600  | -2.30837600 |
| H  | 4.92729000  | 3.89015700  | -2.81167700 |
| H  | 5.29426400  | 2.53891400  | -1.12973700 |
| O  | 4.63645900  | 1.46823900  | -3.25337800 |
| H  | 0.35973500  | 3.37401100  | -1.02738300 |
| H  | 1.15218400  | 2.92219700  | 0.48542200  |
| C  | 1.40247500  | 1.18692700  | -2.52915500 |
| H  | 0.81466300  | 0.29463800  | -2.30873300 |
| H  | 0.76195300  | 1.87471900  | -3.09077500 |
| H  | 2.23649200  | 0.89629300  | -3.17006400 |
| C  | 2.25017800  | -1.92706300 | -1.01170600 |
| C  | 3.07460600  | -1.72553600 | -2.13493700 |
| C  | 1.62730700  | -3.17932000 | -0.84572100 |
| C  | 3.26538700  | -2.75205100 | -3.06477800 |
| H  | 3.57047500  | -0.77904600 | -2.31385600 |
| C  | 1.82704400  | -4.20012700 | -1.77534900 |
| H  | 0.97688400  | -3.33768500 | 0.00538700  |

|   |             |             |             |
|---|-------------|-------------|-------------|
| C | 2.64524200  | -3.98940300 | -2.88759100 |
| H | 3.90018700  | -2.57662200 | -3.92587000 |
| H | 1.33923800  | -5.15777400 | -1.63170700 |
| H | 2.79667500  | -4.78249000 | -3.61104500 |
| C | 3.41383100  | -1.11039700 | 1.45313500  |
| C | 3.26843400  | -1.05468500 | 2.84826900  |
| C | 4.67364200  | -1.44083100 | 0.91654800  |
| C | 4.36039000  | -1.30647500 | 3.68539100  |
| H | 2.30476100  | -0.84502900 | 3.29468400  |
| C | 5.75935200  | -1.69136600 | 1.75565500  |
| H | 4.80027300  | -1.53025500 | -0.15620900 |
| C | 5.60666300  | -1.62001400 | 3.14325000  |
| H | 4.22710500  | -1.26517100 | 4.76071200  |
| H | 6.72069900  | -1.95103200 | 1.32663100  |
| H | 6.45054000  | -1.81903200 | 3.79403100  |
| C | -1.79290200 | 1.54388400  | -1.45796400 |
| C | -2.40316700 | 2.74948500  | -1.85092400 |
| C | -2.00031200 | 0.39088900  | -2.23491500 |
| C | -3.18994400 | 2.80208300  | -3.00188700 |
| H | -2.27747600 | 3.64170800  | -1.24708900 |
| C | -2.79225100 | 0.44906800  | -3.38600000 |
| H | -1.54768400 | -0.54603100 | -1.93275200 |
| C | -3.38467600 | 1.65206000  | -3.77271600 |
| H | -3.65560900 | 3.73674800  | -3.29388400 |
| H | -2.94255600 | -0.44671800 | -3.97830200 |
| H | -3.99834000 | 1.69471800  | -4.66530800 |
| C | -1.63129000 | 2.60871300  | 1.16405800  |
| C | -1.25470100 | 3.93276800  | 1.44652800  |
| C | -2.78734400 | 2.08978500  | 1.78555200  |
| C | -2.00992200 | 4.71604600  | 2.32640300  |
| H | -0.37678800 | 4.36781000  | 0.98577200  |
| C | -3.53917400 | 2.87701400  | 2.65669800  |
| H | -3.08016300 | 1.06248000  | 1.59394800  |
| C | -3.15184100 | 4.19219600  | 2.93170100  |
| H | -1.70344300 | 5.73527800  | 2.53406600  |
| H | -4.42364900 | 2.46135400  | 3.12638100  |
| H | -3.73442800 | 4.80051500  | 3.61378300  |
| C | -2.21205200 | -1.90266400 | 0.45102100  |
| O | -1.12291400 | -1.91712600 | -0.22193000 |
| O | -2.27292700 | -1.16749200 | 1.48480200  |
| C | -3.38251300 | -2.75233100 | 0.01649200  |
| H | -3.46774400 | -3.58130000 | 0.73264300  |
| H | -3.14543000 | -3.18944500 | -0.95836700 |
| C | -0.05038200 | 0.39929600  | 3.44136200  |
| O | 0.35090600  | -0.59261500 | 4.34752600  |
| H | 0.25658900  | 1.37120800  | 3.84161800  |
| H | -1.12433200 | 0.42969900  | 3.25736100  |
| H | 0.60772700  | 0.39232400  | 2.47729700  |

|   |             |             |             |
|---|-------------|-------------|-------------|
| H | 0.26840700  | -1.99033300 | 1.93682600  |
| H | 0.13078300  | -1.43748900 | 3.92279500  |
| C | -4.70821000 | -1.97519500 | -0.02923400 |
| H | -4.88501400 | -1.52230800 | 0.95303800  |
| H | -4.61387300 | -1.14692200 | -0.74385000 |
| C | -5.90078000 | -2.85640100 | -0.41885000 |
| H | -5.71120900 | -3.31854600 | -1.39844900 |
| H | -5.98841300 | -3.68737600 | 0.29603600  |
| C | -7.22929700 | -2.09114100 | -0.47016100 |
| H | -7.14021500 | -1.26089500 | -1.18383100 |
| H | -7.41758500 | -1.62989300 | 0.50882400  |
| C | -8.42026500 | -2.97359500 | -0.85739100 |
| H | -9.35225900 | -2.39945800 | -0.88518100 |
| H | -8.27640000 | -3.42176900 | -1.84730000 |
| H | -8.55582800 | -3.79282900 | -0.14195900 |

## S12. Cartesian coordinates of the optimized stationary points along the side reaction

### Ru<sub>2</sub><sup>ace</sup>-H-acetic

Zero-point = -2959.099255

|    |             |             |             |
|----|-------------|-------------|-------------|
| Ru | -0.01040000 | -0.86923900 | -0.85165800 |
| P  | -1.99043200 | -0.30016600 | 0.35957000  |
| P  | 1.21508600  | 0.84054500  | -0.02846300 |
| C  | 0.62963200  | 1.70047500  | 1.52804200  |
| H  | 0.87748000  | 1.01359000  | 2.34479400  |
| H  | 1.27552900  | 2.57275400  | 1.65630500  |
| C  | -1.76485100 | 0.85194900  | 1.82020100  |
| C  | -0.86117200 | 2.10816000  | 1.66281800  |
| C  | -1.03623900 | 2.90017200  | 2.99841500  |
| H  | -2.03733600 | 3.34695400  | 3.01961500  |
| H  | -0.97050600 | 2.22616900  | 3.86562900  |
| P  | 0.17012900  | 4.24341800  | 3.35771800  |
| H  | -0.45250000 | 4.86652600  | 4.47393600  |
| H  | 1.22848600  | 3.54851900  | 4.00206700  |
| O  | 0.59184000  | 5.15857700  | 2.24464100  |
| H  | -2.76018100 | 1.17248500  | 2.14933200  |
| H  | -1.34242400 | 0.22919700  | 2.61817400  |
| C  | -1.32817300 | 3.01198500  | 0.50581000  |
| H  | -1.19982800 | 2.52377400  | -0.46158000 |
| H  | -2.39102000 | 3.25165800  | 0.61569500  |
| H  | -0.76202500 | 3.94578600  | 0.49318800  |
| C  | 1.58879700  | 2.21516200  | -1.20556800 |
| C  | 1.88126700  | 3.53241700  | -0.80248400 |
| C  | 1.62283600  | 1.90266100  | -2.57803000 |
| C  | 2.19952100  | 4.50645200  | -1.75114500 |
| H  | 1.84378100  | 3.82854900  | 0.23863600  |
| C  | 1.95098900  | 2.88070700  | -3.52000700 |
| H  | 1.37100300  | 0.89998900  | -2.89886800 |

|   |             |             |             |
|---|-------------|-------------|-------------|
| C | 2.23981600  | 4.18315800  | -3.10944900 |
| H | 2.41040900  | 5.51803100  | -1.42380800 |
| H | 1.97266200  | 2.62296700  | -4.57301300 |
| H | 2.48835100  | 4.94318600  | -3.84154800 |
| C | 2.91776500  | 0.38398100  | 0.56254000  |
| C | 3.06740800  | -0.42517500 | 1.70668200  |
| C | 4.07032300  | 0.76957400  | -0.14133900 |
| C | 4.33349600  | -0.82677000 | 2.13576000  |
| H | 2.19248500  | -0.75711800 | 2.25461600  |
| C | 5.33599300  | 0.36138500  | 0.28816300  |
| H | 3.97865500  | 1.38774100  | -1.02530400 |
| C | 5.47302500  | -0.43355900 | 1.42736900  |
| H | 4.43156400  | -1.44775600 | 3.01929800  |
| H | 6.21393800  | 0.66975200  | -0.26809000 |
| H | 6.45612800  | -0.74270200 | 1.76357900  |
| C | -3.47299400 | 0.44160900  | -0.47447300 |
| C | -4.74995600 | 0.39396800  | 0.11533300  |
| C | -3.32037600 | 1.09601900  | -1.70968100 |
| C | -5.84158300 | 1.00010400  | -0.50745000 |
| H | -4.89456500 | -0.13460600 | 1.05090700  |
| C | -4.41803500 | 1.70115600  | -2.32919800 |
| H | -2.34894900 | 1.11339900  | -2.18885800 |
| C | -5.67743000 | 1.65810100  | -1.72973100 |
| H | -6.82034200 | 0.95319200  | -0.04304400 |
| H | -4.28504800 | 2.20400200  | -3.28080200 |
| H | -6.52735200 | 2.12680000  | -2.21264600 |
| C | -2.76797000 | -1.76152500 | 1.19297600  |
| C | -3.27842000 | -1.75429600 | 2.50311100  |
| C | -2.85096700 | -2.95265300 | 0.44412700  |
| C | -3.85844100 | -2.90381000 | 3.04880200  |
| H | -3.23020000 | -0.85819900 | 3.10942300  |
| C | -3.43579900 | -4.09502400 | 0.99202200  |
| H | -2.44443600 | -2.97956500 | -0.56110100 |
| C | -3.94010000 | -4.07516900 | 2.29517500  |
| H | -4.24677500 | -2.88011100 | 4.06110600  |
| H | -3.49232000 | -5.00250800 | 0.40097200  |
| H | -4.39083100 | -4.96506300 | 2.71954500  |
| C | -1.17916600 | -1.35817800 | -3.07010000 |
| O | -1.10176600 | -2.28369400 | -2.20469900 |
| O | -0.69352100 | -0.21055300 | -2.78591800 |
| C | -1.86527400 | -1.57867900 | -4.39311300 |
| H | -2.88963200 | -1.19437900 | -4.32989000 |
| H | -1.34885500 | -1.03189100 | -5.18542300 |
| H | -1.90408100 | -2.64342700 | -4.62848200 |
| H | 1.36820500  | -1.29390100 | -1.69384600 |
| C | 4.92954200  | -3.35826500 | -0.43342700 |
| O | 4.97829200  | -2.83230500 | -1.47471100 |
| O | 4.91234200  | -3.90047200 | 0.60474900  |

|   |            |             |             |
|---|------------|-------------|-------------|
| C | 1.29043200 | -3.10310800 | 0.62171000  |
| O | 0.49755500 | -2.15845900 | 0.80905000  |
| O | 1.94306400 | -3.26717800 | -0.49909800 |
| C | 1.54998200 | -4.13161200 | 1.68267400  |
| H | 2.62356300 | -4.18723300 | 1.88153200  |
| H | 1.23321700 | -5.11352100 | 1.31746000  |
| H | 1.68428600 | -2.45518700 | -1.09999300 |
| H | 0.99961000 | -3.88386300 | 2.58969200  |

### Ru<sub>2</sub><sub>ace</sub>-H-CO<sub>2</sub>

Zero-point = -2959.070886

|    |             |             |             |
|----|-------------|-------------|-------------|
| Ru | 0.45274300  | -0.86424900 | 0.56306300  |
| P  | 0.98687700  | 1.40093200  | -0.41560000 |
| P  | -1.77722300 | -0.83334000 | 0.01365200  |
| C  | -2.24205200 | 0.30791800  | -1.38897700 |
| H  | -1.84329800 | -0.18166100 | -2.28462000 |
| H  | -3.33092100 | 0.24006700  | -1.45876300 |
| C  | -0.27844300 | 1.94977600  | -1.68364500 |
| C  | -1.79914900 | 1.79965800  | -1.39155600 |
| C  | -2.50223700 | 2.50523400  | -2.59746600 |
| H  | -2.34119700 | 3.58654800  | -2.51663900 |
| H  | -2.05607600 | 2.18779600  | -3.55123600 |
| P  | -4.31373100 | 2.23674300  | -2.80340400 |
| H  | -4.63246400 | 3.25329800  | -3.74341900 |
| H  | -4.36875200 | 1.08293100  | -3.62937300 |
| O  | -5.17425500 | 2.18130400  | -1.57345200 |
| H  | -0.07509800 | 3.00201200  | -1.91267200 |
| H  | -0.03609600 | 1.37015100  | -2.58207400 |
| C  | -2.19818900 | 2.54503200  | -0.10396600 |
| H  | -1.75823900 | 2.08539700  | 0.78246400  |
| H  | -1.84474900 | 3.58070500  | -0.14486000 |
| H  | -3.28229600 | 2.55405000  | 0.02205700  |
| C  | -2.92887000 | -0.42844700 | 1.38904600  |
| C  | -4.21140500 | 0.11199300  | 1.16794900  |
| C  | -2.53253600 | -0.72946600 | 2.70542100  |
| C  | -5.06850000 | 0.34838800  | 2.24385600  |
| H  | -4.55261600 | 0.37625500  | 0.17421800  |
| C  | -3.40030500 | -0.49462700 | 3.77514200  |
| H  | -1.54379500 | -1.12872000 | 2.88899400  |
| C  | -4.66718900 | 0.04432100  | 3.54729200  |
| H  | -6.04761900 | 0.77425100  | 2.05843700  |
| H  | -3.08112600 | -0.73124500 | 4.78383000  |
| H  | -5.33760400 | 0.22984400  | 4.37862900  |
| C  | -2.47691400 | -2.41006800 | -0.64843300 |
| C  | -2.00040800 | -2.93543500 | -1.86636100 |
| C  | -3.46381900 | -3.11977300 | 0.05644700  |
| C  | -2.50710300 | -4.13690200 | -2.36281900 |
| H  | -1.21358700 | -2.42701700 | -2.40972700 |

|   |             |             |             |
|---|-------------|-------------|-------------|
| C | -3.96383900 | -4.32311200 | -0.44637200 |
| H | -3.84239200 | -2.73362000 | 0.99388300  |
| C | -3.48984900 | -4.83323200 | -1.65552000 |
| H | -2.12598500 | -4.53206900 | -3.29753500 |
| H | -4.72477700 | -4.85891900 | 0.10937400  |
| H | -3.87886100 | -5.76792100 | -2.04223100 |
| C | 1.21702000  | 2.88799700  | 0.65445600  |
| C | 1.92039800  | 4.01952100  | 0.20254600  |
| C | 0.67009000  | 2.89877100  | 1.95088100  |
| C | 2.05280300  | 5.14199600  | 1.02089700  |
| H | 2.38532300  | 4.01193500  | -0.77650100 |
| C | 0.80583800  | 4.02646100  | 2.76509000  |
| H | 0.15710200  | 2.02149600  | 2.32687700  |
| C | 1.49227200  | 5.14977500  | 2.30112700  |
| H | 2.60073500  | 6.00614600  | 0.66278100  |
| H | 0.37767700  | 4.02280100  | 3.76125900  |
| H | 1.59916600  | 6.02241100  | 2.93510500  |
| C | 2.51656900  | 1.38124000  | -1.44182900 |
| C | 2.66346000  | 2.12965000  | -2.62655600 |
| C | 3.58475800  | 0.57020800  | -1.01761700 |
| C | 3.85208400  | 2.06847200  | -3.35664400 |
| H | 1.85824000  | 2.75648400  | -2.99060700 |
| C | 4.76881900  | 0.50395700  | -1.75626700 |
| H | 3.48651800  | -0.02262000 | -0.11711700 |
| C | 4.90310600  | 1.25534400  | -2.92475300 |
| H | 3.95234200  | 2.64974800  | -4.26661700 |
| H | 5.55920400  | -0.15944100 | -1.42310500 |
| H | 5.81817900  | 1.19968400  | -3.50296700 |
| C | 1.81754700  | -0.43367600 | 2.67202700  |
| O | 2.42145000  | -0.87757000 | 1.65259800  |
| O | 0.54981200  | -0.24827400 | 2.58209900  |
| C | 2.54014800  | -0.08340700 | 3.94185900  |
| H | 2.67113300  | 1.00351400  | 3.98401700  |
| H | 1.94991200  | -0.38553500 | 4.81024100  |
| H | 3.52169900  | -0.55837300 | 3.96338000  |
| H | 0.01006700  | -2.23373100 | 1.25971200  |
| C | 1.14825600  | -2.43960000 | -0.54010300 |
| O | 1.71686500  | -3.49224000 | -0.36965800 |
| O | 0.82108500  | -1.64929800 | -1.45507900 |
| C | 5.22031700  | -2.75550800 | 0.04939900  |
| O | 6.23797800  | -2.10181600 | -0.04002900 |
| O | 4.38545900  | -2.85279900 | -1.00573700 |
| C | 4.78700300  | -3.48169000 | 1.30774000  |
| H | 4.49134700  | -4.51264100 | 1.09003700  |
| H | 5.60611000  | -3.47389800 | 2.02663100  |
| H | 3.91894000  | -2.96738700 | 1.73325100  |
| H | 3.54907800  | -3.29989800 | -0.76928700 |

**Ru<sub>2</sub>dec-H-CO<sub>2</sub>**

Zero-point = -3273.377282

|    |             |             |             |
|----|-------------|-------------|-------------|
| Ru | -1.08858000 | -0.65622900 | 0.69375400  |
| P  | -3.28861000 | -1.27277500 | -0.37741100 |
| P  | -1.29316000 | 1.59586200  | 0.34301500  |
| C  | -3.00063600 | 2.24019100  | -0.07361200 |
| H  | -3.52127000 | 2.26332200  | 0.89058400  |
| H  | -2.84640300 | 3.28436200  | -0.35922500 |
| C  | -4.45528400 | 0.17764400  | -0.55686100 |
| C  | -3.90735900 | 1.52439400  | -1.11448000 |
| C  | -5.17916000 | 2.40561100  | -1.33612800 |
| H  | -5.74824900 | 1.99989700  | -2.18093500 |
| H  | -5.84102000 | 2.36673000  | -0.45837800 |
| P  | -4.92495900 | 4.19994800  | -1.66439800 |
| H  | -6.22793300 | 4.58177800  | -2.08391100 |
| H  | -4.89093500 | 4.75871300  | -0.35955400 |
| O  | -3.79575700 | 4.60963100  | -2.56585800 |
| H  | -5.29265100 | -0.14737900 | -1.18512400 |
| H  | -4.85238900 | 0.35534600  | 0.44954500  |
| C  | -3.21273600 | 1.33026000  | -2.47596900 |
| H  | -2.27945200 | 0.77267100  | -2.37578100 |
| H  | -3.86204700 | 0.76963800  | -3.15629400 |
| H  | -2.98194500 | 2.29263200  | -2.93586400 |
| C  | -0.17064800 | 2.25775300  | -0.95628800 |
| C  | -0.51924400 | 3.32617700  | -1.80543000 |
| C  | 1.12042600  | 1.70054500  | -1.05389300 |
| C  | 0.40006500  | 3.81347400  | -2.73702200 |
| H  | -1.49940100 | 3.78596300  | -1.77152300 |
| C  | 2.03441300  | 2.20250900  | -1.98286900 |
| H  | 1.41490200  | 0.88625300  | -0.40363600 |
| C  | 1.67641400  | 3.25425400  | -2.82812200 |
| H  | 0.11181100  | 4.63024500  | -3.38860900 |
| H  | 3.02496500  | 1.76621500  | -2.03978400 |
| H  | 2.38668400  | 3.63743500  | -3.55206000 |
| C  | -0.94831300 | 2.70093400  | 1.78432400  |
| C  | -1.71544000 | 2.56782600  | 2.95940000  |
| C  | 0.06780400  | 3.66961100  | 1.74237700  |
| C  | -1.47130300 | 3.39159200  | 4.05837600  |
| H  | -2.47656400 | 1.79942900  | 3.02912500  |
| C  | 0.30693600  | 4.48954100  | 2.84801700  |
| H  | 0.67211200  | 3.78034400  | 0.85147800  |
| C  | -0.46106900 | 4.35508800  | 4.00506900  |
| H  | -2.06218700 | 3.27125300  | 4.95926500  |
| H  | 1.09591000  | 5.23143700  | 2.80174100  |
| H  | -0.27030900 | 4.99055900  | 4.86210900  |
| C  | -3.41896800 | -2.12563200 | -2.01176600 |
| C  | -4.57715400 | -2.83747700 | -2.37491000 |
| C  | -2.35129200 | -2.05008000 | -2.92462800 |

|   |             |             |             |
|---|-------------|-------------|-------------|
| C | -4.67026100 | -3.44325400 | -3.62835500 |
| H | -5.39500000 | -2.93687300 | -1.67026900 |
| C | -2.45150600 | -2.65912400 | -4.17875600 |
| H | -1.44260000 | -1.52881500 | -2.64791700 |
| C | -3.60958300 | -3.35230500 | -4.53399300 |
| H | -5.56658500 | -3.99174100 | -3.89504200 |
| H | -1.62270300 | -2.59085300 | -4.87450000 |
| H | -3.68408400 | -3.82542300 | -5.50635200 |
| C | -4.25258000 | -2.39429800 | 0.72152600  |
| C | -5.63763100 | -2.27812900 | 0.93730300  |
| C | -3.54906400 | -3.43000600 | 1.36635700  |
| C | -6.30271700 | -3.17911400 | 1.77293500  |
| H | -6.20676300 | -1.48845200 | 0.46190200  |
| C | -4.22055100 | -4.32788700 | 2.19715100  |
| H | -2.47734900 | -3.51962300 | 1.22731000  |
| C | -5.59650900 | -4.20512800 | 2.40286200  |
| H | -7.37029500 | -3.07631900 | 1.93175100  |
| H | -3.66397300 | -5.11533700 | 2.69219600  |
| H | -6.11368900 | -4.89976600 | 3.05453400  |
| C | 0.16410200  | -2.51654300 | -0.50030400 |
| O | -0.39884800 | -2.79045400 | 0.60052000  |
| O | 0.05824900  | -1.31933600 | -0.95424500 |
| C | 0.90507400  | -3.55522700 | -1.29531900 |
| H | 0.24575400  | -3.93782200 | -2.08249600 |
| H | 1.78142500  | -3.11094100 | -1.77237000 |
| H | 1.20008000  | -4.38354300 | -0.64964000 |
| H | 0.36196300  | -0.19768700 | 1.12728800  |
| C | -0.87387900 | -0.64759500 | 2.72112400  |
| O | -0.04369000 | -0.77454800 | 3.59449000  |
| O | -2.11979200 | -0.52845800 | 2.60818200  |
| C | 3.30651000  | -0.76611700 | 2.27293800  |
| O | 2.80035600  | -0.13833200 | 1.35706900  |
| O | 2.63891500  | -1.24132600 | 3.32466100  |
| C | 4.78636500  | -1.10049600 | 2.35428000  |
| H | 4.87469500  | -2.18818400 | 2.47289100  |
| H | 5.16800100  | -0.67600100 | 3.29214900  |
| H | 1.67804500  | -1.00543300 | 3.27532600  |
| C | 5.59388600  | -0.60447500 | 1.15473600  |
| H | 5.17809500  | -1.03933700 | 0.23753400  |
| H | 5.45957900  | 0.47938800  | 1.05649500  |
| C | 7.08668400  | -0.93856600 | 1.25924500  |
| H | 7.49591500  | -0.50187900 | 2.18176800  |
| H | 7.21329300  | -2.02634400 | 1.35943800  |
| C | 7.90410700  | -0.44269500 | 0.05963700  |
| H | 7.49510700  | -0.87977900 | -0.86259000 |
| H | 7.77687400  | 0.64477100  | -0.03984700 |
| C | 9.39933400  | -0.77105900 | 0.15596800  |
| H | 9.52659600  | -1.85870200 | 0.25480200  |



|   |             |             |             |
|---|-------------|-------------|-------------|
| H | 9.80796200  | -0.33456900 | 1.07865900  |
| C | 10.21519100 | -0.27296900 | -1.04385200 |
| H | 10.08753800 | 0.81467300  | -1.14245100 |
| H | 9.80634700  | -0.70935200 | -1.96659500 |
| C | 11.71073300 | -0.60005300 | -0.94924200 |
| H | 11.83970600 | -1.68772900 | -0.85156300 |
| H | 12.12067200 | -0.16401200 | -0.02674900 |
| C | 12.52633100 | -0.10101400 | -2.14886900 |
| H | 12.39801800 | 0.98578900  | -2.24597700 |
| H | 12.11705200 | -0.53697000 | -3.07055100 |
| C | 14.01874900 | -0.43181000 | -2.04653400 |
| H | 14.18135500 | -1.51397900 | -1.98359600 |
| H | 14.57251000 | -0.06291600 | -2.91627400 |
| H | 14.46437900 | 0.01998400  | -1.15279400 |

**Ru<sub>2</sub><sub>hex</sub>-H-decanoic**

Zero-point = -3273.366735

|    |             |             |             |
|----|-------------|-------------|-------------|
| Ru | -0.44452700 | -0.04485300 | 0.88138800  |
| P  | -1.28199400 | 1.96271800  | -0.15896500 |
| P  | -1.97690800 | -1.40346600 | -0.03846800 |
| C  | -2.97416100 | -0.79048300 | -1.50450200 |
| H  | -2.29889900 | -0.86365500 | -2.36339300 |
| H  | -3.76250800 | -1.52893700 | -1.67131800 |
| C  | -2.45681600 | 1.71916200  | -1.60062100 |
| C  | -3.57508900 | 0.64212900  | -1.47750400 |
| C  | -4.45070400 | 0.83166600  | -2.75767500 |
| H  | -5.01611700 | 1.76708600  | -2.66854500 |
| H  | -3.81860500 | 0.92701500  | -3.65364500 |
| P  | -5.65547900 | -0.49272200 | -3.18134800 |
| H  | -6.37632300 | 0.13857200  | -4.23284500 |
| H  | -4.86437100 | -1.41033500 | -3.92362200 |
| O  | -6.48758500 | -1.10161600 | -2.09047100 |
| H  | -2.92041300 | 2.68568800  | -1.83197500 |
| H  | -1.82082700 | 1.44335600  | -2.44896300 |
| C  | -4.46922100 | 0.88274000  | -0.24595700 |
| H  | -3.91896700 | 0.72799400  | 0.68374400  |
| H  | -4.84280500 | 1.91225000  | -0.24307400 |
| H  | -5.32529100 | 0.20472100  | -0.25019700 |
| C  | -3.25336200 | -2.06942300 | 1.12754600  |
| C  | -4.54659200 | -2.46322300 | 0.73417700  |
| C  | -2.87759300 | -2.23467400 | 2.47462500  |
| C  | -5.43587200 | -3.00422400 | 1.66537200  |
| H  | -4.89272200 | -2.33854800 | -0.28427300 |
| C  | -3.76874400 | -2.78655400 | 3.39804500  |
| H  | -1.89400900 | -1.91202400 | 2.79076000  |
| C  | -5.04907800 | -3.17157000 | 2.99677800  |
| H  | -6.43133200 | -3.29002400 | 1.34514600  |
| H  | -3.46098300 | -2.90775700 | 4.43076600  |

|   |             |             |             |
|---|-------------|-------------|-------------|
| H | -5.74245000 | -3.59371600 | 3.71555300  |
| C | -1.34205100 | -2.98622900 | -0.79110900 |
| C | -0.63296600 | -2.96502700 | -2.00700200 |
| C | -1.48580700 | -4.21534900 | -0.12395000 |
| C | -0.09331500 | -4.13628800 | -2.54111300 |
| H | -0.48536000 | -2.02932900 | -2.53329500 |
| C | -0.93694100 | -5.38470600 | -0.65724900 |
| H | -2.02415800 | -4.25703000 | 0.81417000  |
| C | -0.24204100 | -5.35080200 | -1.86744000 |
| H | 0.44607700  | -4.10082500 | -3.48187000 |
| H | -1.05906600 | -6.32206800 | -0.12611300 |
| H | 0.17889400  | -6.25986900 | -2.28152900 |
| C | -2.14452100 | 3.31155900  | 0.78491500  |
| C | -2.24962500 | 4.62216800  | 0.28328400  |
| C | -2.73937700 | 3.01029100  | 2.02309900  |
| C | -2.94388700 | 5.60119300  | 0.99523000  |
| H | -1.77358700 | 4.88234300  | -0.65564000 |
| C | -3.43453100 | 3.99492800  | 2.73185700  |
| H | -2.64242300 | 2.01146900  | 2.43198000  |
| C | -3.54089700 | 5.28881100  | 2.21995300  |
| H | -3.01441200 | 6.60780000  | 0.59791300  |
| H | -3.89086900 | 3.74722400  | 3.68399600  |
| H | -4.07893800 | 6.05109800  | 2.77201400  |
| C | 0.06409100  | 2.95555200  | -0.97201100 |
| C | -0.00423900 | 3.51573000  | -2.26028900 |
| C | 1.25711300  | 3.11004600  | -0.23511300 |
| C | 1.08741700  | 4.20483000  | -2.80010000 |
| H | -0.90786600 | 3.42253400  | -2.85080300 |
| C | 2.34218200  | 3.80390400  | -0.77507800 |
| H | 1.33058800  | 2.66808900  | 0.75400700  |
| C | 2.26327700  | 4.34954100  | -2.06060900 |
| H | 1.01360600  | 4.63647700  | -3.79267700 |
| H | 3.24909000  | 3.91722300  | -0.19103400 |
| H | 3.10632400  | 4.88886100  | -2.47758000 |
| C | -0.15746400 | 0.96399100  | 3.20878000  |
| O | 0.79159300  | 1.09843400  | 2.38081400  |
| O | -1.22587800 | 0.36581200  | 2.83351700  |
| C | -0.07148900 | 1.53016600  | 4.60344100  |
| H | -0.57508100 | 2.50337000  | 4.62473700  |
| H | -0.57774400 | 0.87250900  | 5.31383700  |
| H | 0.97158500  | 1.67007800  | 4.89207100  |
| H | 0.14818500  | -1.39866000 | 1.55761300  |
| C | 1.76488300  | -3.61324300 | 1.25636600  |
| O | 2.36825000  | -3.23630800 | 0.32696300  |
| O | 1.20214900  | -4.03238500 | 2.19121600  |
| C | 1.47972700  | -0.00205100 | -1.69403700 |
| O | 1.13447400  | -0.23194600 | -0.55060500 |
| O | 0.54443600  | 0.16329200  | -2.66203100 |

|   |             |             |             |
|---|-------------|-------------|-------------|
| C | 2.92586300  | 0.11863500  | -2.11585200 |
| H | 3.10129400  | -0.58816200 | -2.94019400 |
| H | 3.05684500  | 1.12697700  | -2.53652000 |
| H | 0.97269500  | 0.43692600  | -3.48604300 |
| C | 3.91840300  | -0.11968700 | -0.97482700 |
| H | 3.71308000  | 0.60157600  | -0.17633500 |
| H | 3.73555400  | -1.11021300 | -0.54594700 |
| C | 5.37668400  | 0.00178600  | -1.43253900 |
| H | 5.57099200  | -0.71909600 | -2.24015900 |
| H | 5.54593500  | 0.99796200  | -1.86716600 |
| C | 6.37994200  | -0.23172800 | -0.29578000 |
| H | 6.20840300  | -1.22692200 | 0.13717000  |
| H | 6.18386300  | 0.48694100  | 0.51222400  |
| C | 7.84411000  | -0.11389000 | -0.73732400 |
| H | 8.01426800  | 0.88222300  | -1.17100000 |
| H | 8.03868900  | -0.83281700 | -1.54624500 |
| C | 8.84654700  | -0.34851500 | 0.39992600  |
| H | 8.67607400  | -1.34438100 | 0.83313400  |
| H | 8.65129600  | 0.36970600  | 1.20901600  |
| C | 10.31153600 | -0.23110400 | -0.03891100 |
| H | 10.48299200 | 0.76510200  | -0.47197300 |
| H | 10.50759700 | -0.94945100 | -0.84812600 |
| C | 11.31408400 | -0.46616700 | 1.09819900  |
| H | 11.14316800 | -1.46155900 | 1.53038400  |
| H | 11.11843900 | 0.25167800  | 1.90645100  |
| C | 12.77476900 | -0.34708800 | 0.65175400  |
| H | 12.98568300 | 0.64958700  | 0.24717100  |
| H | 13.46425400 | -0.51987300 | 1.48466800  |
| H | 13.01061600 | -1.07666200 | -0.13157300 |

### S13. References

- [1] D.H. Wertz, *J. Am. Chem. Soc.* 1980, **102**, 5316-5322.
- [2] M.-J. Cheng, R. J. Nielsen, W. A. Goddard III *Chem. Commun.* 2014, **50**, 10994-10996; V. Butera, N. Russo, U. Cosentino, C. Greco, G. Moro, D. Pitea, E. Sicilia, Computational Insight on CO<sub>2</sub> Fixation to Produce Styrene Carbonate Assisted by a Single-Center Aluminum(III) Catalyst and Quaternary Ammonium Salts. *ChemCatChem.* 2016, **8**, 1167.
